# Supplementary material
Source: publisher figshare collection journal article supplement (https://springernature.figshare.com/ndownloader/files/12543836)
Supplement: Supplementary file 1 [file 12543836]

## Sheet: Sheet1
Publication Type (J=Journal; B=Book; S=Series; P=Patent)	Authors	Book Authors	Book Editors	Book Group Authors	Author Full Name	Book Authors Full Name	Group Authors	Document Title	Publication Name	Book Series Title	Book Series Subtitle	Language	Document Type	Conference Title	Conference Date	Conference Location	Conference Sponsors	Conference Host	Author Keywords	Keywords Plus (Clarivate)	Abstract	Funding Agency and Grant Number	Funding Text	Cited References	Cited Reference Count	Web of Science Core Collection Times Cited Count	Total Times Cited Count (Web of Science Core Collection, BIOSIS Citation Index, Chinese Science Citation Database, Data Citation Index, Russian Science Citation Index, SciELO Citation Index)	Usage Count (Last 180 Days)	Usage Count (Since 2013)	Publisher	Publisher City	Publisher Address	International Standard Serial Number (ISSN)	Electronic International Standard Serial Number (eISSN)	International Standard Book Number (ISBN)	29-Character Source Abbreviation	ISO Source Abbreviation	Publication Date	Year Published	Volume	Issue	Part Number	Supplement	Special Issue	Meeting Abstract	Beginning Page	Ending Page	Article Number	Digital Object Identifier (DOI)
J	Qi, YF; Wang, DD; Wang, DY; Jin, TC; Yang, LP; Wu, H; Li, YY; Zhao, J; Du, FP; Song, MX; Wang, RJ				Qi, Yunfeng; Wang, Dadong; Wang, Daying; Jin, Taicheng; Yang, Liping; Wu, Hui; Li, Yaoyao; Zhao, Jing; Du, Fengping; Song, Mingxia; Wang, Renjun			HEDD: the human epigenetic drug database	DATABASE-THE JOURNAL OF BIOLOGICAL DATABASES AND CURATION			English	Article							GENE-EXPRESSION; CELL LYMPHOMA; DISCOVERY; INHIBITION; UPDATE; CHEMISTRY; PROTEINS; LEUKEMIA; INSIGHTS; PROVIDE	Epigenetic drugs are chemical compounds that target disordered post-translational modification of histone proteins and DNA through enzymes, and the recognition of these changes by adaptor proteins. Epigenetic drug-related experimental data such as gene expression probed by high-throughput sequencing, co-crystal structure probed by X-RAY diffraction and binding constants probed by bio-assay have b…	National Natural Science Foundation of China [31540035, 81202527, 31301043]; Siping Science and Technology Bureau, China [2015062]; National Natural Science Foundation of China	National Natural Science Foundation of China (Grant No. 31540035, 81202527 and 31301043); the Siping Science and Technology Bureau, China (Grant No. 2015062). Funding for open access charge: National Natural Science Foundation of China.	Amatori Stefano, 2010, Genes Cancer, V1, P197, DOI 10.1177/1947601910365081; Amberger JS, 2015, NUCLEIC ACIDS RES, V43, pD789, DOI 10.1093/nar/gku1205; Archin NM, 2010, PLOS ONE, V5, DOI 10.1371/journal.pone.0009390; Barrett T, 2013, NUCLEIC ACIDS RES, V41, pD991, DOI 10.1093/nar/gks1193; Bento AP, 2014, NUCLEIC ACIDS RES, V42, pD1083, DOI 10.1093/nar/gkt1031; Berman HM, 2000, NUCLEIC ACIDS RES, …	43	0	0	1	1	OXFORD UNIV PRESS	OXFORD	GREAT CLARENDON ST, OXFORD OX2 6DP, ENGLAND	1758-0463			DATABASE-OXFORD	Database	2018-12-26	2016									baw159	10.1093/database/baw159
J	van Gunsteren, WF; Allison, JR; Daura, X; Dolenc, J; Hansen, N; Mark, AE; Oostenbrink, C; Rusu, VH; Smith, LJ				van Gunsteren, Wilfred F.; Allison, Jane R.; Daura, Xavier; Dolenc, Jozica; Hansen, Niels; Mark, Alan E.; Oostenbrink, Chris; Rusu, Victor H.; Smith, Lorna J.			Deriving Structural Information from Experimentally Measured Data on Biomolecules	ANGEWANDTE CHEMIE-INTERNATIONAL EDITION			English	Review						biomolecular structure determination; averaging; ambiguities; experimental data; errors	NUCLEAR-MAGNETIC-RESONANCE; RESTRAINED MOLECULAR-DYNAMICS; HELICAL SECONDARY STRUCTURE; TIME-AVERAGED RESTRAINTS; MACROMOLECULAR STRUCTURE DETERMINATION; PANCREATIC TRYPSIN-INHIBITOR; LAC REPRESSOR HEADPIECE; LIPID TRANSFER PROTEINS; REPLICA-EXCHANGE METHOD; NMR SOLUTION STRUCTURE	During the past half century, the number and accuracy of experimental techniques that can deliver values of observables for biomolecular systems have been steadily increasing. The conversion of a measured value Q(exp) of an observable quantity Q into structural information is, however, a task beset with theoretical and practical problems: 1) insufficient or inaccurate values of Q(exp), 2)inaccura…	Swiss National Science Foundation [20020-137827]; European Research Council (ERC) [228076]; ICREA	This work was financially supported by grant No 20020-137827 of the Swiss National Science Foundation and by grant No 228076 of the European Research Council (ERC), which is gratefully acknowledged.	ABRAHAM RJ, 1962, MOL PHYS, V5, P513, DOI 10.1080/00268976200100581; Adams PD, 2016, STRUCTURE, V24, P502, DOI 10.1016/j.str.2016.02.017; Agirre J, 2015, NAT CHEM BIOL, V11, P303, DOI 10.1038/nchembio.1798; Allison JR, 2009, CHEMPHYSCHEM, V10, P3213, DOI 10.1002/cphc.200900400; Ando T, 2012, NANOTECHNOLOGY, V23, DOI 10.1088/0957-4484/23/6/062001; Bagchi S, 2012, J PHYS CHEM B, V116, P4034, DOI 10…	144	3	3	18	29	WILEY-V C H VERLAG GMBH	WEINHEIM	POSTFACH 101161, 69451 WEINHEIM, GERMANY	1433-7851	1521-3773		ANGEW CHEM INT EDIT	Angew. Chem.-Int. Edit.	2018-12-23	2016	55	52					15990	16010		10.1002/anie.201601828
J	Stular, T; Lesnik, S; Rozman, K; Schink, J; Zdouc, M; Ghysels, A; Liu, F; Aldrich, CC; Haupt, VJ; Salentin, S; Daminelli, S; Schroeder, M; Langer, T; Gobec, S; Janezic, D; Konc, J				Stular, Tanja; Lesnik, Samo; Rozman, Kaja; Schink, Julia; Zdouc, Mitja; Ghysels, An; Liu, Feng; Aldrich, Courtney C.; Haupt, V. Joachim; Salentin, Sebastian; Daminelli, Simone; Schroeder, Michael; Langer, Thierry; Gobec, Stanislav; Janezic, Dusanka; Konc, Janez			Discovery of Mycobacterium tuberculosis InhA Inhibitors by Binding Sites Comparison and Ligands Prediction	JOURNAL OF MEDICINAL CHEMISTRY			English	Article							REDUCTASE FABI INHIBITORS; CARRIER PROTEIN REDUCTASE; ENOYL-ACP REDUCTASE; ANTIMYCOBACTERIAL ACTIVITY; MOLECULAR DOCKING; COUPLED RECEPTOR; DRUG DISCOVERY; TARGETING INHA; DATA-BANK; DESIGN	Drug discovery is usually focused on a single protein target; in this process, existing compounds that bind to related proteins are often ignored. We describe ProBiS plugin, extension of our earlier ProBiSi-ligands approach, which for a given protein structure allows prediction of its binding:sites and, for each binding site, the ligands from similar binding sites in the Protein Data Bank. We dev…	NIAID NIH HHS [R01 AI070219]		Ankerst M, 1999, SIGMOD RECORD, VOL 28, NO 2 - JUNE 1999, P49; Aube J, 2012, ACS MED CHEM LETT, V3, P442, DOI 10.1021/ml300114c; Baell JB, 2010, J MED CHEM, V53, P2719, DOI 10.1021/jm901137j; Berman HM, 2000, NUCLEIC ACIDS RES, V28, P235, DOI 10.1093/nar/28.1.235; Brylinski M, 2009, PLOS COMPUT BIOL, V5, DOI 10.1371/journal.pcbi.1000405; Cavasotto CN, 2008, J MED CHEM, V51, P581, DOI 10.1021/jm07…	75	1	1	5	26	AMER CHEMICAL SOC	WASHINGTON	1155 16TH ST, NW, WASHINGTON, DC 20036 USA	0022-2623	1520-4804		J MED CHEM	J. Med. Chem.	2018-12-22	2016	59	24					11069	11078		10.1021/acs.jmedchem.6b01277
J	Belzile, MN; Godin, R; Durantini, AM; Cosa, G				Belzile, Mei-Ni; Godin, Robert; Durantini, Andres M.; Cosa, Gonzalo			Monitoring Chemical and Biological Electron Transfer Reactions with a Fluorogenic Vitamin K Analogue Probe	JOURNAL OF THE AMERICAN CHEMICAL SOCIETY			English	Article							ALPHA-TOCOPHEROL ADDUCT; QUINONE OXIDOREDUCTASES; FLUORESCENT-PROBES; APROTIC-SOLVENTS; DT-DIAPHORASE; CYTOCHROME-C; LIVING CELLS; BODIPY DYES; ELECTROCHEMISTRY; COMPLEXES	We report herein the design, synthesis, and characterization of a two-segment fluorogenic analogue of vitamin K, B-VKQ, prepared by coupling vitamin K-3, also known as menadione (a quinone redox center), to a boron-dipyrromethene (BODIPY) fluorophore (a lipophilic reporter segment). Oxidation reduction reactions, spectroelectrochemical studies, and enzymatic assays conducted in the presence of DT…	Natural Sciences and Engineering Research Council of Canada (NSERC); Canadian Foundation for Innovation (CFI); NSERC-CGS; NSERC; Drug Discovery and Training Program (CIHR) at McGill	G.C. is grateful to the Natural Sciences and Engineering Research Council of Canada (NSERC) and the Canadian Foundation for Innovation (CFI) for funding. M.-N.B is thankful to NSERC-CGS for a graduate scholarship, R.G. is thankful to NSERC for a postgraduate scholarship, and A.M.D. is thankful to the Drug Discovery and Training Program (CIHR) at McGill for a postdoctoral fellowship.	Aguilar-Martinez M, 2004, CURR ORG CHEM, V8, P1721, DOI 10.2174/1385272043369548; Alberts B. J. A., 2002, MOL BIOL CELL; ARNON DI, 1961, FED PROC, V20, P1012; Berman HM, 2000, NUCLEIC ACIDS RES, V28, P235, DOI 10.1093/nar/28.1.235; Bovicelli P, 2008, SYNTHETIC COMMUN, V38, P391, DOI 10.1080/00397910701771066; Cannes C, 2002, LANGMUIR, V18, P8134, DOI 10.1021/la0258906; Chan J, 2012, NAT CHEM, V4,…	57	1	1	16	44	AMER CHEMICAL SOC	WASHINGTON	1155 16TH ST, NW, WASHINGTON, DC 20036 USA	0002-7863			J AM CHEM SOC	J. Am. Chem. Soc.	2018-12-21	2016	138	50					16388	16397		10.1021/jacs.6b09735
J	Kang, WT; Vellasarny, KM; Rajamani, L; Beuerman, RW; Vadivelu, J				Kang, Wen Tyng; Vellasarny, Kumutha Malar; Rajamani, Lakshminarayanan; Beuerman, Roger W.; Vadivelu, Jamuna			Burkholderia pseudomallei III secreted protein BipC: role in actin modulation and translocation activities required for the bacterial intracellular lifecycle	PEERJ			English	Article						Burkholderia pseudomallei; Type III secretion system; Effector protein; Intracellular lifecycle; Protein expression and purification; Actin dynamics	GRAM-NEGATIVE BACTERIA; ANTIGEN-C IPAC; MOLECULAR-MECHANISMS; INVASIVE SALMONELLA; SHIGELLA-FLEXNERI; BINDING PROTEINS; EPITHELIAL-CELLS; DATA-BANK; F-ACTIN; MELIOIDOSIS	Melioidosis, an infection caused by the facultative intracellular pathogen Burkholderia pseudomallei, has been classified as an emerging disease with the number of patients steadily increasing at an alarming rate. B. pseudomalleipossess various virulence determinants that allow them to invade the host and evade the host immune response, such as the type III secretion systems (TTSS). The products …	Ministry of Higher Education (MOHE), Malaysia [E000013-20001]; University of Malaya Postgraduate Research Grant (PPP) [PG161-2015B]; University of Malaya Research Grant (UMRG) [RP013C-13HTM]	This study was supported by Ministry of Higher Education (MOHE), Malaysia under the High Impact Research (HIR)-MOHE project (E000013-20001), University of Malaya Postgraduate Research Grant (PPP; PG161-2015B), and University of Malaya Research Grant (UMRG) (RP013C-13HTM). The funders had no role in study design, data collection and analysis, decision to publish, or preparation of the manuscript.	ALTSCHUL SF, 1990, J MOL BIOL, V215, P403, DOI 10.1006/jmbi.1990.9999; Arnold R, 2009, PLOS PATHOG, V5, DOI 10.1371/journal.ppat.1000376; Ayscough KR, 1998, CURR OPIN CELL BIOL, V10, P102, DOI 10.1016/S0955-0674(98)80092-6; BAIROCH A, 1992, NUCLEIC ACIDS RES, V20, P2019; Berman HM, 2000, NUCLEIC ACIDS RES, V28, P235, DOI 10.1093/nar/28.1.235; BRADFORD MM, 1976, ANAL BIOCHEM, V72, P248, DOI 10.100…	52	2	2	0	6	PEERJ INC	LONDON	341-345 OLD ST, THIRD FLR, LONDON, EC1V 9LL, ENGLAND	2167-8359			PEERJ	PeerJ	2018-12-21	2016	4								e2532	10.7717/peerj.2532
J	Hall, M; Grundstrom, C; Begum, A; Lindberg, MJ; Sauer, UH; Almqvist, F; Johansson, J; Sauer-Eriksson, AE				Hall, Michael; Grundstrom, Christin; Begum, Afshan; Lindberg, Mikael J.; Sauer, Uwe H.; Almqvist, Fredrik; Johansson, Jorgen; Sauer-Eriksson, A. Elisabeth			Structural basis for glutathione-mediated activation of the virulence regulatory protein PrfA in Listeria	PROCEEDINGS OF THE NATIONAL ACADEMY OF SCIENCES OF THE UNITED STATES OF AMERICA			English	Article						PrfA; glutathione; activation; Listeria; virulence	INTRACELLULAR PATHOGEN; DNA-BINDING; MONOCYTOGENES; GENE; EXPRESSION; PREGNANCY; MUTATION	Infection by the human bacterial pathogen Listeria monocytogenes is mainly controlled by the positive regulatory factor A (PrfA), a member of the Crp/Fnr family of transcriptional activators. Published data suggest that PrfA requires the binding of a cofactor for full activity, and it was recently proposed that glutathione (GSH) could fulfill this function. Here we report the crystal structures o…	Berlin Electron Storage Ring Society for Synchrotron Radiation (BESSY); K.A. Wallenberg Foundation; Swedish Research Council	We thank Drs. C. O. Byrne and Tobias Hainzl for valuable comments. We also thank the staff of the Protein Expertise Platform at Umea University for cloning services and the beamline staff at the European Synchrotron Radiation Facility (ESRF) and Berlin Electron Storage Ring Society for Synchrotron Radiation (BESSY) for support and access to beamlines ID23-2 and ID29 at ESRF and BL14.1 at BESSY. T…	Adams PD, 2010, ACTA CRYSTALLOGR D, V66, P213, DOI 10.1107/S0907444909052925; Berman HM, 2000, NUCLEIC ACIDS RES, V28, P235, DOI 10.1093/nar/28.1.235; Bonnet M, 2013, J BIOL CHEM, V288, P14238, DOI 10.1074/jbc.M113.465484; CHAKRABORTY T, 1992, J BACTERIOL, V174, P568; Collaborative Computational Project, 1994, ACTA CRYSTALLOGR D, V50, P760, DOI DOI 10.1107/S0907444994003112; Cossart P, 2014, FEBS…	33	5	5	0	2	NATL ACAD SCIENCES	WASHINGTON	2101 CONSTITUTION AVE NW, WASHINGTON, DC 20418 USA	0027-8424			P NATL ACAD SCI USA	Proc. Natl. Acad. Sci. U. S. A.	2018-12-20	2016	113	51					14733	14738		10.1073/pnas.1614028114
J	Zafar, M; Khan, H; Rauf, A; Khan, A; Lodhi, MA				Zafar, Muhammad; Khan, Haroon; Rauf, Abdur; Khan, Ajmal; Lodhi, Muhammad Arif			In Silico Study of Alkaloids as alpha-Glucosidase Inhibitors: Hope for the Discovery of Effective Lead Compounds	FRONTIERS IN ENDOCRINOLOGY			English	Article						alpha-glucosidase inhibitors; homology modeling; molecular docking; Molecular Operating Environment; alpha-glucosidase	MALTASE-GLUCOAMYLASE; PROTEIN STRUCTURES; CONSTITUENTS; PURIFICATION; SEQUENCE; SEARCH; ENERGY	alpha-Glucosidase (extinction coefficient 3.2.1.20) is a primary carbohydrate metabolizing enzyme that acts on the 1-4 associated alpha-glucose residues. The inhibition of alpha-glucosidase slows down the process of carbohydrate digestion and avoids postprandial hyperglycemia, which is a major cause of chronic diabetes-associated complication. This study was designed to evaluate the binding capac…			Ain Qurrat-Ul-, 2016, Front Pharmacol, V7, P292; Altschul SF, 1997, NUCLEIC ACIDS RES, V25, P3389, DOI 10.1093/nar/25.17.3389; Berman HM, 2000, NUCLEIC ACIDS RES, V28, P235, DOI 10.1093/nar/28.1.235; BRUNI CB, 1970, BIOCHIM BIOPHYS ACTA, V212, P470, DOI 10.1016/0005-2744(70)90253-6; COLOVOS C, 1993, PROTEIN SCI, V2, P1511; Damsud T, 2013, PHYTOCHEM LETT, V6, P350, DOI 10.1016/j.phytol.2013.04.001…	34	0	0	2	7	FRONTIERS MEDIA SA	LAUSANNE	PO BOX 110, EPFL INNOVATION PARK, BUILDING I, LAUSANNE, 1015, SWITZERLAND	1664-2392			FRONT ENDOCRINOL	Front. Endocrinol.	2018-12-19	2016	7								153	10.3389/fendo.2016.00153
J	Peng, XB; Sieradzan, AK; Niemi, AJ				Peng, Xubiao; Sieradzan, Adam K.; Niemi, Antti J.			Thermal unfolding of myoglobin in the Landau-Ginzburg-Wilson approach	PHYSICAL REVIEW E			English	Article							DIFFUSION-COLLISION MODEL; PROTEIN-FOLDING PROBLEM; STRUCTURAL-CHARACTERIZATION; RENORMALIZATION-GROUP; APOMYOGLOBIN; INTERMEDIATE; KINETICS; DENATURATION; DYNAMICS; NMR	The Landau-Ginzburg-Wilson paradigm is applied to model the low-temperature crystallographic C alpha backbone structure of sperm whale myoglobin. The Glauber protocol is employed to simulate its response to an increase in ambient temperature. The myoglobin is found to unfold from its native state by a succession of alpha-helical intermediates, fully in line with the observed folding and unfolding…	National Science Centre, Poland Maestro (NCN) [DEC-2012/06/A/ST4/00376]; Foundation for Polish Science FNP [Mistrz7./2013]; Foundation for Polish Science [FNP START 100.2014]; Swedish Institute scholarship; Vetenskapsradet; Carl Trygger's Stiftelse for vetenskaplig forskning; Qian Ren Grant at BIT	A.K.S. was supported in part by National Science Centre, Poland Maestro (NCN, DEC-2012/06/A/ST4/00376), Foundation for Polish Science FNP (Mistrz7./2013), the Foundation for Polish Science (FNP START 100.2014), and a Swedish Institute scholarship. A.J.N. acknowledges support from the Vetenskapsradet, Carl Trygger's Stiftelse for vetenskaplig forskning and Qian Ren Grant at BIT. We thank H. Schera…	Ablowitz M., 2004, DISCRETE CONTINUOUS; Alberts B., 2014, MOL BIOL CELL; Anfinsen C B, 1975, Adv Protein Chem, V29, P205, DOI 10.1016/S0065-3233(08)60413-1; BASHFORD D, 1988, PROTEINS, V4, P211, DOI 10.1002/prot.340040308; Berg BA, 2005, LECT NOTES SER INST, V7, P1; Berman HM, 2000, NUCLEIC ACIDS RES, V28, P235, DOI 10.1093/nar/28.1.235; BISHOP RL, 1975, AM MATH MON, V82, P246, DOI 10.2307/231984…	78	0	0	1	1	AMER PHYSICAL SOC	COLLEGE PK	ONE PHYSICS ELLIPSE, COLLEGE PK, MD 20740-3844 USA	2470-0045	2470-0053		PHYS REV E	Phys. Rev. E	2018-12-16	2016	94	6							62405	10.1103/PhysRevE.94.062405
J	Li, QW; Dahl, DB; Vannucci, M; Joo, H; Tsai, JW				Li, Qiwei; Dahl, David B.; Vannucci, Marina; Joo, Hyun; Tsai, Jerry W.			KScons: a Bayesian approach for protein residue contact prediction using the knob-socket model of protein tertiary structure	BIOINFORMATICS			English	Article							AMINO-ACID CODE; CORRELATED MUTATIONS; SEQUENCE; PACKING; ALIGNMENT	Motivation: By simplifying the many-bodied complexity of residue packing into patterns of simple pairwise secondary structure interactions between a single knob residue with a three-residue socket, the knob-socket construct allows a more direct incorporation of structural information into the prediction of residue contacts. By modeling the preferences between the amino acid composition of a socke…	NIH-NIGMS [R01-GM104972]	This work was supported by a NIH-NIGMS grant R01-GM104972.	Altschul SF, 1997, NUCLEIC ACIDS RES, V25, P3389, DOI 10.1093/nar/25.17.3389; ANFINSEN CB, 1973, SCIENCE, V181, P223, DOI 10.1126/science.181.4096.223; Berman HM, 2000, NUCLEIC ACIDS RES, V28, P235, DOI 10.1093/nar/28.1.235; Cheng JL, 2007, BMC BIOINFORMATICS, V8, DOI 10.1186/1471-2105-8-113; Edgar RC, 2004, NUCLEIC ACIDS RES, V32, P1792, DOI 10.1093/nar/gkh340; Fox NK, 2014, NUCLEIC ACIDS RES, V…	32	0	0	0	0	OXFORD UNIV PRESS	OXFORD	GREAT CLARENDON ST, OXFORD OX2 6DP, ENGLAND	1367-4803	1460-2059		BIOINFORMATICS	Bioinformatics	2018-12-15	2016	32	24					3774	3781		10.1093/bioinformatics/btw553
J	Kavanagh, D; McGlasson, S; Jury, A; Williams, J; Scolding, N; Bellamy, C; Gunther, C; Ritchie, D; Gale, DP; Kanwar, YS; Challis, R; Buist, H; Overell, J; Weller, B; Flossmann, O; Blunden, M; Meyer, EP; Krucker, T; Evans, SJW; Campbell, IL; Jackson, AP; Chandran, S; Hunt, DPJ				Kavanagh, David; McGlasson, Sarah; Jury, Alexa; Williams, Jac; Scolding, Neil; Bellamy, Chris; Gunther, Claudia; Ritchie, Diane; Gale, Daniel P.; Kanwar, Yashpal S.; Challis, Rachel; Buist, Holly; Overell, James; Weller, Belinda; Flossmann, Oliver; Blunden, Mark; Meyer, Eric P.; Krucker, Thomas; Evans, Stephen J. W.; Campbell, Iain L.; Jackson, Andrew P.; Chandran, Siddharthan; Hunt, David P. J.			Type I interferon causes thrombotic microangiopathy by a dose-dependent toxic effect on the microvasculature	BLOOD			English	Article							HEMOLYTIC-UREMIC SYNDROME; AICARDI-GOUTIERES-SYNDROME; SYSTEMIC-LUPUS-ERYTHEMATOSUS; MULTIPLE-SCLEROSIS PATIENTS; THROMBOCYTOPENIC PURPURA; NEUROLOGICAL DISEASE; MUTATIONS; BETA; ALPHA; ASSOCIATION	Many drugs have been reported to cause thrombotic microangiopathy (TMA), yet evidence supporting a direct association is often weak. In particular, TMA has been reported in association with recombinant type I interferon (IFN) therapies, with recent concern regarding the use of IFN in multiple sclerosis patients. However, a causal association has yet to be demonstrated. Here, we adopt a combined c…	Wellcome Trust [WT101153MA]; Academy of Medical Sciences; Deutsche Forschungsgemeinschaft [KFO 249/GU1212/1-1, GU1212/1-2]; Medical Research Council; National Health Medical Research Council [512407]; National Institutes of Health, National Institute of Mental Health [MH47680]	D.P.J.H. and D.K. were supported by the Wellcome Trust (WT101153MA) (D.P.J.H.) and the Academy of Medical Sciences. C.G. was supported by a grant from the Deutsche Forschungsgemeinschaft (KFO 249/GU1212/1-1 and GU1212/1-2). A.P.J. was supported by the Medical Research Council. I.L.C. was supported by the National Health Medical Research Council (project grant 512407) and the National Institutes o…	Akwa Y, 1998, J IMMUNOL, V161, P5016; Al-Nouri ZL, 2015, BLOOD, V125, P616, DOI 10.1182/blood-2014-11-611335; Baechler EC, 2003, P NATL ACAD SCI USA, V100, P2610, DOI 10.1073/pnas.0337679100; Ben-Amor AF, 2015, ADV THER, V32, P445, DOI 10.1007/s12325-015-0212-6; Bennett L, 2003, J EXP MED, V197, P711, DOI 10.1084/jem.20021553; Berman HM, 2000, NUCLEIC ACIDS RES, V28, P235, DOI 10.1093/nar/28.1.23…	41	6	6	0	1	AMER SOC HEMATOLOGY	WASHINGTON	2021 L ST NW, SUITE 900, WASHINGTON, DC 20036 USA	0006-4971	1528-0020		BLOOD	Blood	2018-12-15	2016	128	24					2824	2833		10.1182/blood-2016-05-715987
J	Rawi, R; Mall, R; Kunji, K; El Anbari, M; Aupetit, M; Ullah, E; Bensmail, H				Rawi, Reda; Mall, Raghvendra; Kunji, Khalid; El Anbari, Mohammed; Aupetit, Michael; Ullah, Ehsan; Bensmail, Halima			COUSCOus: improved protein contact prediction using an empirical Bayes covariance estimator	BMC BIOINFORMATICS			English	Article						Residue-residue contact prediction; Shrinkage; GLasso	MULTIPLE SEQUENCE ALIGNMENTS; SECONDARY STRUCTURE; MUTUAL INFORMATION; RESIDUE CONTACTS; R-PACKAGE; COEVOLUTION; MUTATIONS; EVOLUTION; LASSO	Background: The post-genomic era with its wealth of sequences gave rise to a broad range of protein residue-residue contact detecting methods. Although various coevolution methods such as PSICOV, DCA and plmDCA provide correct contact predictions, they do not completely overlap. Hence, new approaches and improvements of existing methods are needed to motivate further development and progress in t…			Bakan A, 2014, BIOINFORMATICS, V30, P2681, DOI 10.1093/bioinformatics/btu336; Berman HM, 2000, NUCLEIC ACIDS RES, V28, P235, DOI 10.1093/nar/28.1.235; Burger L, 2010, PLOS COMPUT BIOL, V6, DOI 10.1371/journal.pcbi.1000633; de Juan D, 2013, NAT REV GENET, V14, P249, DOI 10.1038/nrg3414; Dunn SD, 2008, BIOINFORMATICS, V24, P333, DOI 10.1093/bioinformatics/btm604; Eickholt J, 2012, BIOINFORMATICS, V…	42	0	0	3	4	BIOMED CENTRAL LTD	LONDON	236 GRAYS INN RD, FLOOR 6, LONDON WC1X 8HL, ENGLAND	1471-2105			BMC BIOINFORMATICS	BMC Bioinformatics	2018-12-15	2016	17								533	10.1186/s12859-016-1400-3
J	Kollitz, EM; Zhang, GZ; Hawkins, MB; Whitfield, GK; Reif, DM; Kullman, SW				Kollitz, Erin M.; Zhang, Guozhu; Hawkins, Mary Beth; Whitfield, G. Kerr; Reif, David M.; Kullman, Seth W.			Evolutionary and Functional Diversification of the Vitamin D Receptor-Lithocholic Acid Partnership	PLoS One			English	Article							BILE-ACIDS; NUCLEAR RECEPTOR; VERTEBRATE EVOLUTION; LIGAND; GENOME; INSIGHTS; SALT; PXR; BIOTRANSFORMATIONS; CARCINOGENESIS	The evolution, molecular behavior, and physiological function of nuclear receptors are of particular interest given their diverse roles in regulating essential biological processes. The vitamin D receptor (VDR) is well known for its canonical roles in calcium homeostasis and skeletal maintenance. Additionally, VDR has received an increased amount of attention due to the discovery of numerous non-…	National Science Foundation [IOS818799]; NIEHS [T32-ES007046]; North Carolina State University; Mount Desert Island Biological Laboratory	This work was supported by the National Science Foundation Grant #IOS818799, NIEHS Training Grant #T32-ES007046, The Disseration Completion Grant from North Carolina State University, and the Stan and Judy Fellowship from Mount Desert Island Biological Laboratory. The funders had no role in study design, data collection and analysis, decision to publish, or preparation of the manuscript.	Ajouz H, 2014, WORLD J SURG ONCOL, V12, DOI 10.1186/1477-7819-12-164; Belorusova AY, 2014, J MED CHEM, V57, P4710, DOI 10.1021/jm5002524; Berman HM, 2000, NUCLEIC ACIDS RES, V28, P235, DOI 10.1093/nar/28.1.235; Bernstein H, 2005, MUTAT RES-REV MUTAT, V589, P47, DOI 10.1016/j.mrrev.2004.08.001; Bridgham JT, 2006, SCIENCE, V312, P97, DOI 10.1126/science.1123348; Broughton R.E., 2013, PLOS CURR, DOI…	51	0	0	1	1	PUBLIC LIBRARY SCIENCE	SAN FRANCISCO	1160 BATTERY STREET, STE 100, SAN FRANCISCO, CA 94111 USA	1932-6203			PLOS ONE	PLoS One	2018-12-12	2016	11	12							e0168278	10.1371/journal.pone.0168278
J	Ghanakota, P; Carlson, HA				Ghanakota, Phani; Carlson, Heather A.			Driving Structure-Based Drug Discovery through Cosolvent Molecular Dynamics	JOURNAL OF MEDICINAL CHEMISTRY			English	Article							COMPETITIVE SATURATION SILCS; BINDING HOT-SPOTS; SOLVENT CRYSTAL-STRUCTURES; COPY SIMULTANEOUS SEARCH; PROTEIN-LIGAND BINDING; HIV-1 PROTEASE; SITE-IDENTIFICATION; FREE-ENERGY; PROBE MOLECULES; DIHYDROFOLATE-REDUCTASE	Identifying binding hotspots on protein surfaces is of prime interest in structure-based drug discovery, either to assess the tractability of pursuing a protein target or to drive improved potency of lead compounds. Computational approaches to detect such regions have traditionally relied on energy minimization of probe molecules onto static protein conformations in the absence of the natural aqu…	National Institutes of Health [R01 GM65372]	This work has been supported by the National Institutes of Health (R01 GM65372).	Allen KN, 1996, J PHYS CHEM-US, V100, P2605, DOI 10.1021/jp952516o; Alvarez-Garcia D, 2014, J MED CHEM, V57, P8530, DOI [10.1021/jm5010418, 10.1021/jm50100418]; Alvarez-Garcia D, 2014, J CHEM THEORY COMPUT, V10, P2608, DOI 10.1021/ct500182z; Bakan A, 2012, J CHEM THEORY COMPUT, V8, P2435, DOI 10.1021/ct300117j; Barril X, 2013, WIRES COMPUT MOL SCI, V3, P327, DOI 10.1002/wcms.1134; Basse N, 2010, …	88	4	4	5	22	AMER CHEMICAL SOC	WASHINGTON	1155 16TH ST, NW, WASHINGTON, DC 20036 USA	0022-2623	1520-4804		J MED CHEM	J. Med. Chem.	2018-12-08	2016	59	23					10383	10399		10.1021/acs.jmedchem.6b00399
J	Lai, R; Li, H				Lai, Rui; Li, Hui			Hydrogen Abstraction of Camphor Catalyzed by Cytochrome P450(cam): A QM/MM Study	JOURNAL OF PHYSICAL CHEMISTRY B			English	Article							EFFECTIVE CORE POTENTIALS; COMPOUND-I; ALIPHATIC HYDROXYLATION; FORCE-FIELD; MOLECULAR CALCULATIONS; REBOUND MECHANISM; BASIS-SETS; P450CAM; CHEMISTRY; DISPERSION	A combined quantum mechanics and molecular mechanics (QM/MM, QM = UB3LYP-D3, MM = AMBER) method is used to study the hydrogen abstraction reaction in P450(cam) catalyzed hydroxylation of camphor in the quartet state. Compared to QM/MM calculations in the literature, this study uses larger basis sets for the most important atoms at the active site and QM/MM Hessian harmonic frequency calculations …			Altun A, 2006, J AM CHEM SOC, V128, P3924, DOI 10.1021/ja058196w; Altun A, 2006, J COMPUT CHEM, V27, P1324, DOI 10.1002/jcc.20398; Altun A, 2008, J PHYS CHEM A, V112, P12904, DOI 10.1021/jp802092w; Balabanov NB, 2005, J CHEM PHYS, V123, DOI 10.1063/1.1998907; BECKE AD, 1993, J CHEM PHYS, V98, P5648, DOI 10.1063/1.464913; BEEMAN D, 1976, J COMPUT PHYS, V20, P130, DOI 10.1016/0021-9991(76)90059-0; …	57	0	0	5	22	AMER CHEMICAL SOC	WASHINGTON	1155 16TH ST, NW, WASHINGTON, DC 20036 USA	1520-6106			J PHYS CHEM B	J. Phys. Chem. B	2018-12-08	2016	120	48					12312	12320		10.1021/acs.jpcb.6b09923
J	Adhikari, B; Nowotny, J; Bhattacharya, D; Hou, J; Cheng, JL				Adhikari, Badri; Nowotny, Jackson; Bhattacharya, Debswapna; Hou, Jie; Cheng, Jianlin			ConEVA: a toolbox for comprehensive assessment of protein contacts	BMC BIOINFORMATICS			English	Article						Protein contact assessment; Chord diagrams; Contact maps; Contact visualization; Jaccard similarity	SUPPORT VECTOR MACHINES; RESIDUE-RESIDUE CONTACTS; MODEL QUALITY ASSESSMENT; STRUCTURE PREDICTION; MAP PREDICTION; COEVOLUTION; RECONSTRUCTION; VISUALIZATION; NETWORKS; CASP8	Background: In recent years, successful contact prediction methods and contact-guided ab initio protein structure prediction methods have highlighted the importance of incorporating contact information into protein structure prediction methods. It is also observed that for almost all globular proteins, the quality of contact prediction dictates the accuracy of structure prediction. Hence, like ma…	US National Institutes of Health 10 (NIH) grant [R01GM093123]	This work has been supported in part by the US National Institutes of Health 10 (NIH) grant (R01GM093123) to J.C.	Adhikari B, 2015, PROTEINS, V83, P1436, DOI 10.1002/prot.24829; Baker FN, 2016, BMC BIOINFORMATICS, V17, DOI 10.1186/s12859-016-0975-z; Berman HM, 2000, NUCLEIC ACIDS RES, V28, P235, DOI 10.1093/nar/28.1.235; Bhattacharya D, 2016, BIOINFORMATICS, V32, P2791, DOI 10.1093/bioinformatics/btw316; Bhattacharya D, 2015, SCI REP-UK, V5, DOI 10.1038/srep16332; Cao RZ, 2016, SCI REP-UK, V6, DOI 10.1038/sr…	43	1	1	1	3	BIOMED CENTRAL LTD	LONDON	236 GRAYS INN RD, FLOOR 6, LONDON WC1X 8HL, ENGLAND	1471-2105			BMC BIOINFORMATICS	BMC Bioinformatics	2018-12-07	2016	17								517	10.1186/s12859-016-1404-z
J	Marcolino, ACS; Porto, WE; Pires, AS; Franco, OL; Alencar, SA				Marcolino, Antonio C. S.; Porto, William E.; Pires, Allan S.; Franco, Octavio L.; Alencar, Sergio A.			Structural impact analysis of missense SNPs present in the uroguanylin gene by long-term molecular dynamics simulations	JOURNAL OF THEORETICAL BIOLOGY			English	Article						Uroguanylin; Missense SNPs; Molecular dynamics; Structural impact	SINGLE NUCLEOTIDE POLYMORPHISMS; BIOLOGICAL FUNCTIONS; PROTEIN FUNCTION; COLLECTIVE MOTION; FUNCTIONAL IMPACT; MUTATIONS; STABILITY; GUANYLIN; DISEASE; SERVER	The guanylate cyclase activator 2B, also known as uroguanylin, is part of the guanylin peptide family, which includes peptides such as guanylin and lymphoguanylin. The guanylin peptides could be related to sodium absorption inhibition and water secretion induction and their dysfunction may be related to various pathologies such as chronic renal failure, congestive heart failure and nephrotic synd…	CNPq (Conselho Nacional de Desenvolvimento Cientifico e Tecnologico); CAPES (Coordenacao de Aperfeicoamento de Pessoal de Nivel Superior); FAPDF (Fundacao de Apoio a Pesquisa do Distrito Federal); UCB (Universidade Catolica de Brasilia)	This work was supported by CNPq (Conselho Nacional de Desenvolvimento Cientifico e Tecnologico); CAPES (Coordenacao de Aperfeicoamento de Pessoal de Nivel Superior); FAPDF (Fundacao de Apoio a Pesquisa do Distrito Federal); and UCB (Universidade Catolica de Brasilia).	Adcock SA, 2006, CHEM REV, V106, P1589, DOI 10.1021/cr040426m; Adzhubei IA, 2010, NAT METHODS, V7, P248, DOI 10.1038/nmeth0410-248; Armon A, 2001, J MOL BIOL, V307, P447, DOI 10.1006/jmbi.2000.4474; Baker NA, 2001, P NATL ACAD SCI USA, V98, P10037, DOI 10.1073/pnas.181342398; Bendl J, 2014, PLOS COMPUT BIOL, V10, DOI 10.1371/journal.pcbi.1003440; Berendsen H.J.C., 1969, INTERMOLECULAR FORCE, P191…	71	1	1	1	9	ACADEMIC PRESS LTD- ELSEVIER SCIENCE LTD	LONDON	24-28 OVAL RD, LONDON NW1 7DX, ENGLAND	0022-5193	1095-8541		J THEOR BIOL	J. Theor. Biol.	2018-12-07	2016	410						9	17		10.1016/j.jtbi.2016.09.008
J	Meyers, J; Brown, N; Blagg, J				Meyers, Joshua; Brown, Nathan; Blagg, Julian			Mapping the 3D structures of small molecule binding sites	JOURNAL OF CHEMINFORMATICS			English	Article						Binding site prediction; Binding site comparison; Mapping binding site space; Protein structure	PROTEIN DATA-BANK; SCREENING TECHNOLOGY; POCKET DETECTION; LIGAND DESIGN; DATABASE; SHAPE; SIMILARITY; PDB; GENERATION; PREDICTION	Background: Analysis of the 3D structures of protein-ligand binding sites can provide valuable insights for drug discovery. Binding site comparison (BSC) studies can be employed to elucidate the function of orphan proteins or to predict the potential for polypharmacology. Many previous binding site analyses only consider binding sites surrounding an experimentally observed bound ligand. Results: …	Wellcome Trust [102361/Z/13/Z]; Cancer Research UK [C309/A11566]	JM is supported by Wellcome Trust Grant 102361/Z/13/Z. NB and JB are supported by Cancer Research UK Grant C309/A11566.	Altschul SF, 1997, NUCLEIC ACIDS RES, V25, P3389, DOI 10.1093/nar/25.17.3389; Ballester PJ, 2009, J MOL GRAPH MODEL, V27, P836, DOI 10.1016/j.jmgm.2009.01.001; Batista J., 2014, J CHEMINF SUPPL 1, V6, pP57, DOI DOI 10.1186/1758-2946-6-S1-P57; Berman HM, 2000, NUCLEIC ACIDS RES, V28, P235, DOI 10.1093/nar/28.1.235; Blow D. M., 2002, OUTLINE CRYSTALLOGRA; Brylinski M, 2008, PROTEINS, V70, P363, DOI…	56	0	0	4	9	BIOMED CENTRAL LTD	LONDON	236 GRAYS INN RD, FLOOR 6, LONDON WC1X 8HL, ENGLAND	1758-2946			J CHEMINFORMATICS	J. Cheminformatics	2018-12-06	2016	8								70	10.1186/s13321-016-0180-0
J	McCafferty, CL; Sergeev, YV				McCafferty, Caitlyn L.; Sergeev, Yuri V.			Dataset of eye disease-related proteins analyzed using the unfolding mutation screen	SCIENTIFIC DATA			English	Article; Data Paper							MISSENSE MUTATIONS; RESIDUE DEPTH; WEB SERVER; ATOM DEPTH; PREDICTION; STABILITY; RECOGNITION; SURFACE	A number of genetic diseases are a result of missense mutations in protein structure. These mutations can lead to severe protein destabilization and misfolding. The unfolding mutation screen (UMS) is a computational method that calculates unfolding propensities for every possible missense mutation in a protein structure. The UMS validation demonstrated a good agreement with experimental and pheno…			Adzhubei IA, 2010, NAT METHODS, V7, P248, DOI 10.1038/nmeth0410-248; Baker D, 2000, NATURE, V405, P39, DOI 10.1038/35011000; Bava KA, 2004, NUCLEIC ACIDS RES, V32, pD120, DOI 10.1093/nar/gkh082; Berman HM, 2000, NUCLEIC ACIDS RES, V28, P235, DOI 10.1093/nar/28.1.235; Bross P, 1999, HUM MUTAT, V14, P186, DOI 10.1002/(SICI)1098-1004(1999)14:3<186::AID-HUMU2>3.0.CO;2-J; Capriotti E, 2005, NUCLEIC AC…	27	2	2	2	3	NATURE PUBLISHING GROUP	LONDON	MACMILLAN BUILDING, 4 CRINAN ST, LONDON N1 9XW, ENGLAND	2052-4463			SCI DATA	Sci. Data	2018-12-06	2016	3								UNSP 160112	10.1038/sdata.2016.112
J	Zhuang, XY; Zhao, B; Liu, S; Song, FR; Cui, FC; Liu, ZQ; Li, YQ				Zhuang, Xiaoyu; Zhao, Bing; Liu, Shu; Song, Fengrui; Cui, Fengchao; Liu, Zhiqiang; Li, Yunqi			Noncovalent Interactions between Superoxide Dismutase and Flavonoids Studied by Native Mass Spectrometry Combined with Molecular Simulations	ANALYTICAL CHEMISTRY			English	Article							AMYOTROPHIC-LATERAL-SCLEROSIS; DENSITY-FUNCTIONAL THERMOCHEMISTRY; AMYLOID DISEASE; SERUM-ALBUMIN; SPORADIC ALS; AGGREGATION; MUTANTS; SOD1; PATHWAY; INHIBITORS	Misfolding and aggregation of Cu, Zn superoxide dismutase (SOD1) is implicated in the etiology of amyotrophic lateral sclerosis (ALS). The use of small molecules may stabilize the spatial structure of SOD1 dimer, thus, preventing its dissociation and aggregation. In this study, "native" mass spectrometry (MS) was used to study the noncovalent interactions between SOD1 and flavonoid compounds. MS …	National Natural Science Foundation of China [81530094, 21673219, 21504092]	This work was supported by the National Natural Science Foundation of China (81530094, 21673219, and 21504092). We thank the Computing Center of Jilin Province to essential support in computational resources.	Auclair JR, 2010, P NATL ACAD SCI USA, V107, P21394, DOI 10.1073/pnas.1015463107; BECKE AD, 1992, J CHEM PHYS, V96, P2155, DOI 10.1063/1.462066; BECKE AD, 1992, J CHEM PHYS, V97, P9173, DOI 10.1063/1.463343; BECKE AD, 1993, J CHEM PHYS, V98, P5648, DOI 10.1063/1.464913; BECKE AD, 1988, PHYS REV A, V38, P3098, DOI 10.1103/PhysRevA.38.3098; Berman HM, 2000, NUCLEIC ACIDS RES, V28, P235, DOI 10.1093…	42	0	0	5	19	AMER CHEMICAL SOC	WASHINGTON	1155 16TH ST, NW, WASHINGTON, DC 20036 USA	0003-2700	1520-6882		ANAL CHEM	Anal. Chem.	2018-12-06	2016	88	23					11720	11726		10.1021/acs.analchem.6b03359
J	Fu, LL; Wang, SY; Wang, X; Wang, PQ; Zheng, YX; Yao, DH; Guo, MR; Zhang, L; Ouyang, L				Fu, Leilei; Wang, Shuya; Wang, Xuan; Wang, Peiqi; Zheng, Yaxin; Yao, Dahong; Guo, Mingrui; Zhang, Lan; Ouyang, Liang			Crystal structure-based discovery of a novel synthesized PARP1 inhibitor (OL-1) with apoptosis-inducing mechanisms in triple-negative breast cancer	SCIENTIFIC REPORTS			English	Article							SMALL-MOLECULE INHIBITORS; DNA-DAMAGE RESPONSE; POLY(ADP-RIBOSE); PHARMACOPHORE; DOCKING; REPAIR; INSIGHTS; STRESS; TUMORS	Poly (ADP-ribose) polymerase-1 (PARP1) is a highly conserved enzyme focused on the self-repair of cellular DNA damage. Until now, numbers of PARP inhibitors have been reported and used for breast cancer therapy in recent years, especially in TNBC. However, developing a new type PARP inhibitor with distinctive skeleton is alternatively promising strategy for TNBC therapy. In this study, based on c…	National Natural Science Foundation of China [81473091]; Distinguished Young Scholars of Sichuan University [2015SCU04A41]; China Postdoctoral Science Foundation [2015M580794, 2016M590893]	We are grateful to Prof. Yuquan Wei for providing the cell lines and antibodies used in the study, as well as his critical comments on the manuscript. This work was supported by grants from the National Natural Science Foundation of China (Grant No. 81473091), Distinguished Young Scholars of Sichuan University (No. 2015SCU04A41) and China Postdoctoral Science Foundation (Grant Nos 2015M580794 and…	Ashworth A, 2008, J CLIN ONCOL, V26, P3785, DOI 10.1200/JCO.2008.16.0812; Berman HM, 2000, NUCLEIC ACIDS RES, V28, P235, DOI 10.1093/nar/28.1.235; Blum G, 2014, ACS CHEM BIOL, V9, P2471, DOI 10.1021/cb500515r; Brooks BR, 2009, J COMPUT CHEM, V30, P1545, DOI 10.1002/jcc.21287; Csete B, 2009, PATHOL ONCOL RES, V15, P47, DOI 10.1007/s12253-008-9086-0; DelloRusso C, 2007, MOL CANCER RES, V5, P35, DOI…	42	1	1	6	10	NATURE PUBLISHING GROUP	LONDON	MACMILLAN BUILDING, 4 CRINAN ST, LONDON N1 9XW, ENGLAND	2045-2322			SCI REP-UK	Sci Rep	2018-12-05	2016	6								3	10.1038/s41598-016-0007-2
J	Chen, HF; Zhou, XR; Zheng, J; Kwoh, CK				Chen, Haifen; Zhou, Xinrui; Zheng, Jie; Kwoh, Chee-Keong			Rules of co-occurring mutations characterize the antigenic evolution of human influenza A/H3N2, A/H1N1 and B viruses	BMC MEDICAL GENOMICS			English	Article; Proceedings Paper	15th International Conference on Bioinformatics (InCoB) - Medical Genomics	SEP 21-23, 2016	Queenstown, SINGAPORE			Influenza virus; A/H3N2/H1N1 and B; Antigenic evolution; Co-occurring mutation; Influenza vaccine	HEMAGGLUTININ RECEPTOR-BINDING; A VIRUS; INFORMATION; SITES; H1N1	Background: The human influenza viruses undergo rapid evolution (especially in hemagglutinin (HA), a glycoprotein on the surface of the virus), which enables the virus population to constantly evade the human immune system. Therefore, the vaccine has to be updated every year to stay effective. There is a need to characterize the evolution of influenza viruses for better selection of vaccine candi…	AcRF Tier 2 grant, Ministry of Education, Singapore [MOE2014-T2-2-023]	Publication of this article was funded by AcRF Tier 2 grant MOE2014-T2-2-023, Ministry of Education, Singapore.	Agrawal R., 1993, SIGMOD Record, V22, P207, DOI 10.1145/170035.170072; Ambrose CS, 2012, HUM VACC IMMUNOTHER, V8, P81, DOI 10.4161/hv.8.1.17623; Bao YM, 2008, J VIROL, V82, P596, DOI 10.1128/JVI.02005-07; Bedford T, 2014, ELIFE, V3, DOI 10.7554/eLife.01914; Berman HM, 2000, NUCLEIC ACIDS RES, V28, P235, DOI 10.1093/nar/28.1.235; Bush RM, 1999, SCIENCE, V286, P1921, DOI 10.1126/science.286.5446.19…	48	1	1	2	6	BIOMED CENTRAL LTD	LONDON	236 GRAYS INN RD, FLOOR 6, LONDON WC1X 8HL, ENGLAND	1755-8794			BMC MED GENOMICS	BMC Med. Genomics	2018-12-05	2016	9			3					69	10.1186/s12920-016-0230-5
J	Hanebuth, MA; Kityk, R; Fries, SJ; Jain, A; Kriel, A; Albanese, V; Frickey, T; Peter, C; Mayer, MP; Frydman, J; Deuerling, E				Hanebuth, Marie A.; Kityk, Roman; Fries, Sandra J.; Jain, Alok; Kriel, Allison; Albanese, Veronique; Frickey, Tancred; Peter, Christine; Mayer, Matthias P.; Frydman, Judith; Deuerling, Elke			Multivalent contacts of the Hsp70 Ssb contribute to its architecture on ribosomes and nascent chain interaction	Nature Communications			English	Article							POLYPEPTIDE-ASSOCIATED COMPLEX; TETHERED MOLECULAR CHAPERONES; NEWLY SYNTHESIZED PROTEINS; SACCHAROMYCES-CEREVISIAE; EUKARYOTIC RIBOSOME; SUBSTRATE-BINDING; MULTIGENE FAMILY; CLOSE PROXIMITY; IN-VIVO; YEAST	Hsp70 chaperones assist de novo folding of newly synthesized proteins in all cells. In yeast, the specialized Hsp70 Ssb directly binds to ribosomes. The structural basis and functional mode of recruitment of Ssb to ribosomes is not understood. Here, we present the molecular details underlying ribosome binding of Ssb in Saccharomyces cerevisiae. This interaction is multifaceted, involving the co-c…	fellowships of the Konstanz Research School Chemical Biology; German Science Foundation (DFG) [SFB969]; NIH; Human Frontier in Science; State Baden-Wurttemberg; DFG	We thank Valentin Schoop, Martin Gamerdinger and Steffen Preissler for valuable support and discussion of the manuscript and Christina Schlatterer for proofreading. This work was supported by fellowships of the Konstanz Research School Chemical Biology to M.A.H. and S.J.F., by research grants from the German Science Foundation (DFG; SFB969) to E.D. and C.P., from NIH to J.F. and from Human Fronti…	Albanese V, 2010, J CELL BIOL, V189, P69, DOI 10.1083/jcb.201001054; BERENDSEN HJC, 1987, J PHYS CHEM-US, V91, P6269, DOI 10.1021/j100308a038; BERENDSEN HJC, 1984, J CHEM PHYS, V81, P3684, DOI 10.1063/1.448118; Berman HM, 2000, NUCLEIC ACIDS RES, V28, P235, DOI 10.1093/nar/28.1.235; Bertelsen EB, 2009, P NATL ACAD SCI USA, V106, P8471, DOI 10.1073/pnas.0903503106; BOORSTEIN WR, 1994, J MOL EVOL, …	57	4	4	0	11	NATURE PUBLISHING GROUP	LONDON	MACMILLAN BUILDING, 4 CRINAN ST, LONDON N1 9XW, ENGLAND	2041-1723			NAT COMMUN	Nat. Commun.	2018-12-05	2016	7								13695	10.1038/ncomms13695
J	Haimov, B; Srebnik, S				Haimov, Boris; Srebnik, Simcha			A closer look into the alpha-helix basin	Scientific Reports			English	Article							ISOLATED-PAIR HYPOTHESIS; PROTEIN DATA-BANK; POLY-L-ALANINE; MOLECULAR-DYNAMICS; HYDROGEN-BOND; CONFORMATIONAL-ANALYSIS; RAMACHANDRAN PLOT; ENERGY FUNCTIONS; FORCE-FIELD; PEPTIDES	alpha-Helices are the most abundant structures found within proteins and play an important role in the determination of the global structure of proteins and their function. Representation of alpha-helical structures with the common (phi,psi) dihedrals, as in Ramachandran maps, does not provide informative details regarding the helical structure apart for the abstract geometric meaning of the dihe…	Israel Science Foundation [318/11, 265/16]	This work was funded in part by the Israel Science Foundation Grants No. 318/11 and 265/16. B.H. dedicates this contribution to the memory of the grandfather and the mentor Kano Yakubov (1936-2016).	Baker EG, 2015, NAT CHEM BIOL, V11, P221, DOI 10.1038/nchembio.1739; Baldwin RL, 2000, P NATL ACAD SCI USA, V97, P12391, DOI 10.1073/pnas.97.23.12391; BENNAIM A, 1991, J PHYS CHEM-US, V95, P1437, DOI 10.1021/j100156a074; Berman H, 2007, NUCLEIC ACIDS RES, V35, pD301, DOI 10.1093/nar/gkl971; Berman HM, 2000, NUCLEIC ACIDS RES, V28, P235, DOI 10.1093/nar/28.1.235; Dill KA, 2012, SCIENCE, V338, P104…	45	0	0	4	6	NATURE PUBLISHING GROUP	LONDON	MACMILLAN BUILDING, 4 CRINAN ST, LONDON N1 9XW, ENGLAND	2045-2322			SCI REP-UK	Sci Rep	2018-12-05	2016	6								38341	10.1038/srep38341
J	Hamey, JJ; Hart-Smith, G; Erce, MA; Wilkins, MR				Hamey, Joshua J.; Hart-Smith, Gene; Erce, Melissa A.; Wilkins, Marc R.			The activity of a yeast Family 16 methyltransferase, Efm2, is affected by a conserved tryptophan and its N-terminal region	FEBS OPEN BIO			English	Article						lysine methylation; methyltransferase; Saccharomyces cerevisiae	PROTEIN LYSINE METHYLATION; ELECTRON-TRANSFER FLAVOPROTEIN; ARGININE METHYLTRANSFERASE; NONHISTONE PROTEINS; MASS-SPECTROMETRY; MULTIPLE-SCLEROSIS; HUMAN METTL20; IDENTIFICATION; MEMBER; ROLES	The Family 16 methyltransferases are a group of eukaryotic nonhistone protein methyltransferases. Sixteen of these have recently been described in yeast and human, but little is known about their sequence and structural features. Here we investigate one of these methyltransferases, Saccharomyces cerevisiae elongation factor methyltransferase 2 (Efm2), by site-directed mutagenesis and truncation. …			Adebali O, 2015, BIOINFORMATICS, V31, P1475, DOI 10.1093/bioinformatics/btu836; Alcina A, 2013, J MED GENET, V50, P25, DOI 10.1136/jmedgenet-2012-101085; Arnold K, 2006, BIOINFORMATICS, V22, P195, DOI 10.1093/bioinformatics/bti770; Berman HM, 2000, NUCLEIC ACIDS RES, V28, P235, DOI 10.1093/nar/28.1.235; Bernkopf M, 2014, HUM MOL GENET, V23, P4015, DOI 10.1093/hmg/ddu115; Biggar KK, 2015, NAT REV …	64	0	0	0	0	WILEY	HOBOKEN	111 RIVER ST, HOBOKEN 07030-5774, NJ USA	2211-5463			FEBS OPEN BIO	FEBS Open Bio	DEC	2016	6	12					1320	1330		10.1002/2211-5463.12153
J	Kumar, S; Ghorui, SK				Kumar, Sanjay; Ghorui, S. K.			ISOLATION AND MOLECULAR CHARACTERISATION OF ACTIN GENE OF Trypanosoma evansi FROM INDIAN DROMEDARIES	JOURNAL OF CAMEL PRACTICE AND RESEARCH			English	Article						Actin gene; Indian dromedaries; molecular characterisation; Trypanosoma evansi	ANTIGENIC VARIATION; PROTEIN; BRUCEI; IMMUNIZATION; ALIGNMENT; DATABASE	The present study was carried out to isolate the actin gene of Trypanosoma evansi by reverse transcription polymerase chain reaction, clone the amplicon in a suitable bacterial plasmid vector, characterisation of gene through sequencing and molecular modeling of obtained actin protein. Total RNA of T. evansi was used to amplify the actin gene by RT-PCR, amplification was done using gene specific …			Altschul SF, 1997, NUCLEIC ACIDS RES, V25, P3389, DOI 10.1093/nar/25.17.3389; ALTSCHUL SF, 1990, J MOL BIOL, V215, P403, DOI 10.1006/jmbi.1990.9999; Berman HM, 2000, NUCLEIC ACIDS RES, V28, P235, DOI 10.1093/nar/28.1.235; BORST P, 1994, SCIENCE, V264, P1872, DOI 10.1126/science.7516579; Broadhead R, 2006, NATURE, V440, P224, DOI 10.1038/nature04541; BROOKS BR, 1983, J COMPUT CHEM, V4, P187, DOI 1…	23	0	0	0	0	CAMEL PUBL HOUSE	BIKANER	67 GANDHI NAGAR WEST, NEAR LALGARH PALACE, BIKANER 334001, INDIA	0971-6777			J CAMEL PRACT RES	J. Camel Pract. Res.	DEC	2016	23	2					233	240		10.5958/2277-8934.2016.00040.0
J	Lopez-Vasquez, L; Albanez, S; Pestana, C; Porco, A				Lopez-Vasquez, Lucia; Albanez, Silvia; Pestana, Carolina; Porco, Antonietta			Detection of F8 mutations in carriers and patients with severe hemophilia A. Identification of a novel mutation	INVESTIGACION CLINICA			English	Article						carrier; factor VIII; molecular diagnosis; mutation; hemophilia A; Venezuela	FACTOR-VIII GENE; SENSITIVE GEL-ELECTROPHORESIS; COAGULATION-FACTOR-VIII; PRENATAL-DIAGNOSIS; GERM-CELLS; FACTOR-IX; INVERSIONS; POLYMORPHISM; INTRON-22; FAMILIES	The molecular diagnosis of haemophilia A (HA) patients has many benefits including diagnosis confirmation and inhibitor risk development prediction. In female carries of a mutation, the molecular diagnosis allows for genetic counseling and prenatal diagnosis, which have become part of the comprehensive care for HA in many countries. Therefore, the aim of this study was to determine the F8 mutatio…	LOCTI [4984-07]	The authors gratefully acknowledge Drs. Arlette Ruiz-Saez, Apsara Boadas and Norma de Bosch for sample collection and data compilation. This work was funded by LOCTI project 4984-07. The authors stated that they had no interests which might be perceived as posing a conflict or bias.	Adzhubei IA, 2010, NAT METHODS, V7, P248, DOI 10.1038/nmeth0410-248; Albanez S, 2011, HAEMOPHILIA, V17, pE913, DOI 10.1111/j.1365-2516.2011.02500.x; ARRUDA VR, 1995, BLOOD, V86, P3015; Becker J, 1996, AM J HUM GENET, V58, P657; Berman HM, 2000, NUCLEIC ACIDS RES, V28, P235, DOI 10.1093/nar/28.1.235; Borjas L, 2010, INVEST CLIN, V51, P391; Bowen DJ, 2003, THROMB HAEMOSTASIS, V89, P201; BROCKERVRIE…	36	0	0	3	3	INST INVESTIGACION CLINICA	MARACAIBO	APARTADO 23, MARACAIBO 4001-A, VENEZUELA	0535-5133			INVEST CLIN	Invest. Clin.	DEC	2016	57	4					377	387
J	Wang, W; Zhuo, QC; Han, SJ; Liu, Q				Wang, Wei; Zhuo, Qing-Cui; Han, Shi-Jie; Liu, Qian			QSAR-based targeting anaplastic lymphoma kinase (ALK) variants with noncognate inhibitors in pediatric acute lymphoblastic leukemia	JOURNAL OF CHEMOMETRICS			English	Article						anaplastic lymphoma kinase; chemometrics; chemotherapy drug; pediatric acute lymphoblastic leukemia; quantitative structure-activity relationship	CELL LUNG-CANCER; INTERACTION MAP; PREDICTION; CRIZOTINIB; MUTANTS	Human anaplastic lymphoma kinase (ALK) is a potential target for the treatment of pediatric acute lymphoblastic leukemia. However, a number of residue mutations in ALK kinase domain have been observed to cause drug resistance in pediatric acute lymphoblastic leukemia chemotherapy. Here, a chemometrics quantitative structure-activity relationship predictor was developed using a structure-based pan…	Xinxiang Central Hospital; Qilu Hospital	Xinxiang Central Hospital and Qilu Hospital	Ai XH, 2015, BIOCHIMIE, V112, P111, DOI 10.1016/j.biochi.2015.03.003; Awad Mark M, 2014, Clin Adv Hematol Oncol, V12, P429; Barreca A, 2011, J MOL ENDOCRINOL, V47, pR11, DOI 10.1530/JME-11-0004; Berman HM, 2000, NUCLEIC ACIDS RES, V28, P235, DOI 10.1093/nar/28.1.235; Cao Y, 2014, BIOINFORMATICS, V30, P1674, DOI 10.1093/bioinformatics/btu104; Chiarle R, 2008, NAT REV CANCER, V8, P11, DOI 10.1038/n…	27	0	0	1	1	WILEY-BLACKWELL	HOBOKEN	111 RIVER ST, HOBOKEN 07030-5774, NJ USA	0886-9383	1099-128X		J CHEMOMETR	J. Chemometr.	DEC	2016	30	12					759	765		10.1002/cem.2857
J	Vadivel, K; Kumar, Y; Ogueli, GI; Ponnuraj, SM; Wongkongkathep, P; Loo, JA; Bajaj, MS; Bajaj, SP				Vadivel, K.; Kumar, Y.; Ogueli, G. I.; Ponnuraj, S. M.; Wongkongkathep, P.; Loo, J. A.; Bajaj, M. S.; Bajaj, S. P.			S2 '-subsite variations between human and mouse enzymes (plasmin, factor XIa, kallikrein) elucidate inhibition differences by tissue factor pathway inhibitor-2 domain1-wild-type, Leu17Arg-mutant and aprotinin	JOURNAL OF THROMBOSIS AND HAEMOSTASIS			English	Article						antifibrinolytic agents; aprotinin; fibrinolysis; TFPI-2; tranexamic acid	EPSILON-AMINOCAPROIC ACID; ACTIVATABLE FIBRINOLYSIS INHIBITOR; 4 TANDEM REPEATS; TRANEXAMIC ACID; CARDIAC-SURGERY; CONVULSIVE SEIZURES; PROTEASE INHIBITOR; SERINE-PROTEASE; REACTIVE-SITE; BLEEDING-TIME	Background: Using tissue factor pathway inhibitor (TFPI)-2 Kunitz domain1 (KD1), we obtained a bifunctional antifibrinolytic molecule (KD1(L17R)-K-T) with C-terminal lysine (kringle domain binding) and P2'-residue arginine (improved specificity towards plasmin). KD1(L17R)-K-T strongly inhibited human plasmin (hPm), with no inhibition of human kallikrein (hKLK) or factor XIa (hXIa). Furthermore, K…	National Heart, Lung and Blood Institute [5R21HL122878]; US National Institutes of Health [R01 GM103479]; Development and Promotion of Science and Technology Talents Project (DPST), Royal Thai Government	We thank P. Liu of Orthopaedic Surgery and J. Ricks-Oddie of UCLA IDRE for statistical consulting services. This work was supported, in part, by National Heart, Lung and Blood Institute grant 5R21HL122878. Support from the US National Institutes of Health (R01 GM103479 to J. A. Loo) and the Development and Promotion of Science and Technology Talents Project (DPST), Royal Thai Government (to P. Wo…	Al-Horani RA, 2014, MED RES REV, V34, P1168, DOI 10.1002/med.21315; Bajaj MS, 2011, J BIOL CHEM, V286, P4329, DOI 10.1074/jbc.M110.191163; Baker NA, 2001, P NATL ACAD SCI USA, V98, P10037, DOI 10.1073/pnas.181342398; Beith JG, 1984, BIOCHEM MEDICA, V32, P387; Berman HM, 2000, NUCLEIC ACIDS RES, V28, P235, DOI 10.1093/nar/28.1.235; Bojar RM, 2005, MANUAL PERIOPERATIVE, P129; Bokesch PM, 2012, J TH…	72	0	0	0	3	WILEY-BLACKWELL	HOBOKEN	111 RIVER ST, HOBOKEN 07030-5774, NJ USA	1538-7933	1538-7836		J THROMB HAEMOST	J. Thromb. Haemost.	DEC	2016	14	12					2509	2523		10.1111/jth.13538
J	Garza-Fabre, M; Kandathil, SM; Handl, J; Knowles, J; Lovell, SC				Garza-Fabre, Mario; Kandathil, Shaun M.; Handl, Julia; Knowles, Joshua; Lovell, Simon C.			Generating, Maintaining, and Exploiting Diversity in a Memetic Algorithm for Protein Structure Prediction	EVOLUTIONARY COMPUTATION			English	Article						Protein structure prediction; Fragment assembly; Memetic algorithms	RELATE 2 SETS; SECONDARY STRUCTURE; SCORING FUNCTIONS; OPTIMIZATION; SEARCH; DESIGN; FRAGMENTS; RECOGNITION; REFINEMENT; ACCURACY	Computational approaches to de novo protein tertiary structure prediction, including those based on the preeminent "fragment-assembly" technique, have failed to scale up fully to larger proteins (on the order of 100 residues and above). A number of limiting factors are thought to contribute to the scaling problem over and above the simple combinatorial explosion, but the key ones relate to the la…			ANFINSEN CB, 1973, SCIENCE, V181, P223, DOI 10.1126/science.181.4096.223; Azoitei ML, 2011, SCIENCE, V334, P373, DOI 10.1126/science.1209368; Bateman A, 2015, NUCLEIC ACIDS RES, V43, pD204, DOI 10.1093/nar/gku989; Berman HM, 2000, NUCLEIC ACIDS RES, V28, P235, DOI 10.1093/nar/28.1.235; Beyer H.-G., 2002, Natural Computing, V1, P3, DOI 10.1023/A:1015059928466; Bowman GR, 2009, PROTEINS, V74, P777,…	65	2	2	0	1	MIT PRESS	CAMBRIDGE	ONE ROGERS ST, CAMBRIDGE, MA 02142-1209 USA	1063-6560	1530-9304		EVOL COMPUT	Evol. Comput.	WIN	2016	24	4			SI		577	607		10.1162/EVCO_a_00176
J	Bugge, K; Lindorff-Larsen, K; Kragelund, BB				Bugge, Katrine; Lindorff-Larsen, Kresten; Kragelund, Birthe B.			Understanding single-pass transmembrane receptor signaling from a structural viewpoint-what are we missing?	FEBS Journal			English	Review						dimerization; NMR; protein structure; signal transduction; single-pass TMDs	HELIX-HELIX INTERACTIONS; PROTEIN-PROTEIN INTERACTIONS; AMYLOID PRECURSOR PROTEIN; GROWTH-FACTOR RECEPTOR; NUCLEAR-MAGNETIC-RESONANCE; T-CELL-RECEPTOR; MEMBRANE-PROTEINS; NMR-SPECTROSCOPY; SPATIAL STRUCTURE; GLYCOPHORIN-A	Single-pass transmembrane receptors are involved in essential processes of both physiological and pathological nature and represent more than 1300 proteins in the human genome. Despite the high biological relevance of these receptors, the mechanisms of the signal transductions they facilitate are incompletely understood. One major obstacle is the lack of structures of the transmembrane domains th…	Lundbeck foundation; Danish Research Council for Health and Disease [12-125862]; Novo Nordisk Foundation; VELUX FOUNDATIONS	This work was supported by grants from the Lundbeck foundation (BBK), the Danish Research Council for Health and Disease (BBK, grant number 12-125862) and the Novo Nordisk Foundation (BBK and KLL). We thank the VELUX FOUNDATIONS for a generous grant to purchase new NMR equipment. This is a contribution from the Linderstrom-Lang Centre for Protein Science. We thank Gitte W. Haxholm for critical re…	Anbazhagan V, 2010, BBA-BIOMEMBRANES, V1798, P1899, DOI 10.1016/j.bbamem.2010.06.027; Arkhipov A, 2013, CELL, V152, P557, DOI 10.1016/j.cell.2012.12.030; Barrett PJ, 2012, SCIENCE, V336, P1168, DOI 10.1126/science.1219988; Bateman A, 2015, NUCLEIC ACIDS RES, V43, pD204, DOI 10.1093/nar/gku989; Battiste JL, 2000, BIOCHEMISTRY-US, V39, P5355, DOI 10.1021/bi000060h; Bennasroune A, 2004, MOL BIOL CEL…	141	2	2	6	16	WILEY-BLACKWELL	HOBOKEN	111 RIVER ST, HOBOKEN 07030-5774, NJ USA	1742-464X	1742-4658		FEBS J	FEBS J.	DEC	2016	283	24					4424	4451		10.1111/febs.13793
J	Chopra, G; Kaushik, S; Elkin, PL; Samudrala, R				Chopra, Gaurav; Kaushik, Sashank; Elkin, Peter L.; Samudrala, Ram			Combating Ebola with Repurposed Therapeutics Using the CANDO Platform	MOLECULES			English	Article						drug repurposing and discovery; multitarget docking; compound-proteome interaction; candock	PROTEIN-STRUCTURE REFINEMENT; DRUG DISCOVERY; APPROVED DRUGS; VIRUS; IDENTIFICATION; PATHOGENESIS; RESISTANCE; EVOLUTION; ALIGNMENT; DISEASES	Ebola virus disease (EVD) is extremely virulent with an estimated mortality rate of up to 90%. However, the state-of-the-art treatment for EVD is limited to quarantine and supportive care. The 2014 Ebola epidemic in West Africa, the largest in history, is believed to have caused more than 11,000 fatalities. The countries worst affected are also among the poorest in the world. Given the complexiti…	NIH [1DP1OD006779]; NCATS [UL1TR001412]; NCI/VA BD-STEP Fellowship in Big Data Sciences; Purdue University	This project was supported in part by a 2010 NIH Director's Pioneer Award (1DP1OD006779), a NCATS award (UL1TR001412), and a NCI/VA BD-STEP Fellowship in Big Data Sciences. The content is solely the responsibility of the authors and does not necessarily represent the official view of the NIH. G.C. acknowledges support from Purdue University start-up funds. We acknowledge former members of the Sam…	Baize S, 2014, NEW ENGL J MED, V371, P1418, DOI 10.1056/NEJMoa1404505; Berman HM, 2000, NUCLEIC ACIDS RES, V28, P235, DOI 10.1093/nar/28.1.235; Bernard B, 2009, PROTEINS, V76, P115, DOI 10.1002/prot.22323; Bonander N, 2009, EXPERT REV PROTEOMIC, V6, P501, DOI [10.1586/epr.09.65, 10.1586/EPR.09.65]; CDC, 2014, EB OUTBR W AFR CAS C; Chopra G, 2016, CURR PHARM DESIGN, V22, P3109, DOI 10.2174/1381612…	42	1	1	4	7	MDPI AG	BASEL	ST ALBAN-ANLAGE 66, CH-4052 BASEL, SWITZERLAND	1420-3049			MOLECULES	Molecules	DEC	2016	21	12							1537	10.3390/molecules21121537
J	Noel, F; Malpertuy, A; de Brevern, AG				Noel, Floriane; Malpertuy, Alain; de Brevern, Alexandre G.			Global analysis of VHHs framework regions with a structural alphabet	BIOCHIMIE			English	Article						Secondary structure; Sequence structure relationship; Structural alphabet; Antibodies; Frameworks	SINGLE-DOMAIN ANTIBODIES; HEAVY-CHAIN ANTIBODIES; PROTEIN DATA-BANK; THROMBOTIC THROMBOCYTOPENIC PURPURA; STRUCTURE PREDICTION SERVER; MODELING ASSESSMENT; VARIABLE REGION; SECONDARY STRUCTURE; CANCER-THERAPY; NANOBODY	The VHHs are antigen-binding region/domain of camelid heavy chain antibodies (HCAb). They have many interesting biotechnological and biomedical properties due to their small size, high solubility and stability, and high affinity and specificity for their antigens. HCAb and classical IgGs are evolutionary related and share a common fold. VHHs are composed of regions considered as constant, called …	French Ministry of Research; University Paris Diderot; Sorbonne Paris Cite; French National Institute for Blood Transfusion (INTS); French Institute for Health and Medical Research (INSERM); Indo-French Centre for the Promotion of Advanced Research/CEFIPRA [5302-2]; Laboratory of Excellence GR-Ex [ANR-11-LABX-0051]; programme "Investissements d'avenir" of the French National Research Agency [ANR-…	We would like to thanks Nicolas Shinada, Akhila Melarkode Vattekatte, Olivier Bertrand, Jean-Philippe Meyneil and Jean-Christophe Gelly for fruitful discussions, and Pierrick Craveur for his help with the VHH structures. This work was supported by grants from the French Ministry of Research, University Paris Diderot, Sorbonne Paris Cite, French National Institute for Blood Transfusion (INTS), Fre…	Almagro JC, 2008, FRONT BIOSCI-LANDMRK, V13, P1619, DOI 10.2741/2786; Almagro JC, 2014, PROTEINS, V82, P1553, DOI 10.1002/prot.24567; Almagro JC, 2011, PROTEINS, V79, P3050, DOI 10.1002/prot.23130; Andreani J, 2015, BIOINFORMATICS, V31, P1729, DOI 10.1093/bioinformatics/btv041; Banner DW, 2013, ACTA CRYSTALLOGR D, V69, P1124, DOI 10.1107/S0907444913006574; Berman H, 2003, NAT STRUCT BIOL, V10, P9…	92	0	0	6	10	ELSEVIER FRANCE-EDITIONS SCIENTIFIQUES MEDICALES ELSEVIER	PARIS	23 RUE LINOIS, 75724 PARIS, FRANCE	0300-9084	1638-6183		BIOCHIMIE	Biochimie	DEC	2016	131						11	19		10.1016/j.biochi.2016.09.005
J	Kern, C; Liao, L				Kern, Colin; Liao, Li			A post-decoding re-ranking algorithm for predicting interacting residues in proteins with hidden Markov models incorporating long-distance information	COMPUTATIONAL BIOLOGY AND CHEMISTRY			English	Article						Protein-protein interaction; Genetic algorithm		Protein-protein interactions play a central role in the biological processes of cells. Accurate prediction of the interacting residues in protein-protein interactions enhances understanding of the interaction mechanisms and enables in siiico mutagenesis, which can help facilitate drug design and deepen our understanding of the inner workings of cells. Correlations have been found among interactin…			Berman HM, 2000, NUCLEIC ACIDS RES, V28, P235, DOI 10.1093/nar/28.1.235; Braun P, 2009, NAT METHODS, V6, P91, DOI [10.1038/nmeth.1281, 10.1038/NMETH.1281]; Chen Chien Peter, 2002, Appl Bioinformatics, V1, P21; Crooks GE, 2004, BIOINFORMATICS, V20, P1603, DOI 10.1093/bioinformatics/bth132; Decanniere K, 1999, STRUCT FOLD DES, V7, P361, DOI 10.1016/S0969-2126(99)80049-5; DELCARDAYRE SB, 1995, PROTE…	18	0	0	0	1	ELSEVIER SCI LTD	OXFORD	THE BOULEVARD, LANGFORD LANE, KIDLINGTON, OXFORD OX5 1GB, OXON, ENGLAND	1476-9271	1476-928X		COMPUT BIOL CHEM	Comput. Biol. Chem.	DEC	2016	65						21	28		10.1016/j.compbiolchem.2016.09.015
J	Amic, A; Markovic, Z; Markovic, JMD; Jeremic, S; Lucic, B; Amic, D				Amic, Ana; Markovic, Zoran; Markovic, Jasmina M. Dimitric; Jeremic, Svetlana; Lucic, Bono; Amic, Dragan			Free radical scavenging and COX-2 inhibition by simple colon metabolites of polyphenols: A theoretical approach	COMPUTATIONAL BIOLOGY AND CHEMISTRY			English	Article						3-Hydroxyphenylacetic acid; 4-Hydroxyphenylpropionic acid; Free radical scavenging; DFT; COX-2; Docking	OXIDATIVE STRESS; PHENOLIC-ACIDS; PHYSICOCHEMICAL EXAMINATION; CYCLOOXYGENASE INHIBITORS; MICROBIAL FERMENTATION; DENSITY FUNCTIONALS; DIETARY POLYPHENOLS; URINARY-EXCRETION; ANTIOXIDANTS; MECHANISMS	Free radical scavenging and inhibitory potency against cyclooxygenase-2 (COX-2) by two abundant colon metabolites of polyphenols, i.e., 3-hydroxyphenylacetic acid (3-HPAA) and 4-hydroxyphenylpropionic acid (4-HPPA) were theoretically studied. Different free radical scavenging mechanisms are investigated in water and pentyl ethanoate as a solvent. By considering electronic properties of scavenged …			Alberto ME, 2013, PHYS CHEM CHEM PHYS, V15, P4642, DOI 10.1039/c3cp43319f; Alvarez-Diduk R, 2015, J PHYS CHEM B, V119, P3479, DOI 10.1021/acs.jpcb.5b00052; Amaravani M, 2006, INDIAN J CHEM A, V45, P174; Amaravani M, 2012, SPRINGERPLUS, V1, DOI 10.1186/2193-1801-1-58; Amic A, 2017, FOOD CHEM, V218, P144, DOI 10.1016/j.foodchem.2016.09.018; Amic D, 2013, J MOL MODEL, V19, P2593, DOI 10.1007/s00894-…	78	3	3	2	10	ELSEVIER SCI LTD	OXFORD	THE BOULEVARD, LANGFORD LANE, KIDLINGTON, OXFORD OX5 1GB, OXON, ENGLAND	1476-9271	1476-928X		COMPUT BIOL CHEM	Comput. Biol. Chem.	DEC	2016	65						45	53		10.1016/j.compbiolchem.2016.09.013
J	Lin, YF; Cheng, CW; Shih, CS; Hwang, JK; Yu, CS; Lu, CH				Lin, Yu-Feng; Cheng, Chih-Wen; Shih, Chung-Shiuan; Hwang, Jenn-Kang; Yu, Chin-Sheng; Lu, Chih-Hao			MI6: Metal Ion-Binding Site Prediction and Docking Server	JOURNAL OF CHEMICAL INFORMATION AND MODELING			English	Article							PROTEINS; SEQUENCE; IDENTIFICATION; CELLS	The structure of a protein determines its biological function(s) and its interactions with other factors; the binding regions tend to be conserved in sequence and structure, and the interacting residues involved are usually in close 3D space. The Protein Data Bank currently contains more than 110 000 protein structures, approximately one-third of which contain metal ions. Identifying and characte…	Academic Summit Program of Ministry of Science and Technology [99-2113-M-039-002-MY2, 105-2113-M-009-017-]	This research was supported in part by Academic Summit Program of Ministry of Science and Technology with grant number 99-2113-M-039-002-MY2 to C.-H.L. and 105-2113-M-009-017- to J.-K.H.	Babor M, 2008, PROTEINS, V70, P208, DOI 10.1002/prot.21587; Berman HM, 2000, NUCLEIC ACIDS RES, V28, P235, DOI 10.1093/nar/28.1.235; Binet MRB, 2003, ANAL BIOCHEM, V318, P30, DOI 10.1016/S0003-2697(03)00190-8; CHOTHIA C, 1986, EMBO J, V5, P823; Crichton RR, 2002, J INORG BIOCHEM, V91, P9, DOI 10.1016/S0162-0134(02)00461-0; GRUMBACH L, 1954, CIRC RES, V2, P452; HENIKOFF S, 1992, P NATL ACAD SCI US…	19	1	1	3	4	AMER CHEMICAL SOC	WASHINGTON	1155 16TH ST, NW, WASHINGTON, DC 20036 USA	1549-9596	1549-960X		J CHEM INF MODEL	J. Chem Inf. Model.	DEC	2016	56	12					2287	2291		10.1021/acs.jcim.6b00407
J	Fraczek, T				Fraczek, Tomasz			Simulation-Based Algorithm for Two-Dimensional Chemical Structure Diagram Generation of Complex Molecules and Ligand-Protein Interactions	JOURNAL OF CHEMICAL INFORMATION AND MODELING			English	Article							PROGRAM; DEPICTION; DISPLAY; SMILES	Computer programs for structure diagram generation (SDG) are indispensable cheminformatic tools that translate one- or three-dimensional (1D or 3D) chemical structure data stored in electronic formats to human-readable 2D depictions. Although many such programs are known, only a moderate part of chemical space can be handled by existing algorithms. For many classes of natural and synthetic compou…			Accelrys Software Inc, 2012, DISC STUD MOD ENV RE; [Anonymous], 2015, OSIRIS DATAWARRIOR 4; Assaf KI, 2015, CHEM SOC REV, V44, P394, DOI 10.1039/c4cs00273c; Berman HM, 2000, NUCLEIC ACIDS RES, V28, P235, DOI 10.1093/nar/28.1.235; Brecher J, 2008, PURE APPL CHEM, V80, P277, DOI 10.1351/pac200880020277; CARHART RE, 1976, J CHEM INF COMP SCI, V16, P82, DOI 10.1021/ci60006a011; Chemical Computing Gro…	30	0	0	4	4	AMER CHEMICAL SOC	WASHINGTON	1155 16TH ST, NW, WASHINGTON, DC 20036 USA	1549-9596	1549-960X		J CHEM INF MODEL	J. Chem Inf. Model.	DEC	2016	56	12					2320	2335		10.1021/acs.jcim.6b00391
J	Cappel, D; Hall, ML; Lenselink, EB; Beuming, T; Qi, J; Bradner, J; Sherman, W				Cappel, Daniel; Hall, Michelle Lynn; Lenselink, Eelke B.; Beuming, Thijs; Qi, Jun; Bradner, James; Sherman, Woody			Relative Binding Free Energy Calculations Applied to Protein Homology Models	JOURNAL OF CHEMICAL INFORMATION AND MODELING			English	Article							HIV-1 REVERSE-TRANSCRIPTASE; DRUG-LIKE MOLECULES; INDUCED FIT DOCKING; FORCE-FIELD; LEAD OPTIMIZATION; NONNUCLEOSIDE INHIBITORS; SCORING FUNCTIONS; ACCURATE DOCKING; REPLICA EXCHANGE; TYK2 INHIBITORS	A significant challenge and potential high-value application of computer-aided drug design is the accurate prediction of protein ligand binding affinities. Free energy perturbation (FEP) using molecular dynamics (MD) sampling is among the most suitable approaches to achieve accurate binding free energy predictions, due to the rigorous statistical framework of the methodology, correct representati…			Aldeghi M, 2016, CHEM SCI, V7, P207, DOI 10.1039/c5sc02678d; Berman HM, 2000, NUCLEIC ACIDS RES, V28, P235, DOI 10.1093/nar/28.1.235; Beuming T, 2012, J CHEM INF MODEL, V52, P3263, DOI [10.1021/ci300411b, 10.1021/ci3004111]; Borrelli KW, 2010, J COMPUT CHEM, V31, P1224, DOI 10.1002/jcc.21409; Boukharta L, 2014, PLOS COMPUT BIOL, V10, DOI 10.1371/journal.pcbi.1003585; Boyce SE, 2009, J MOL BIOL, V…	76	6	6	1	14	AMER CHEMICAL SOC	WASHINGTON	1155 16TH ST, NW, WASHINGTON, DC 20036 USA	1549-9596	1549-960X		J CHEM INF MODEL	J. Chem Inf. Model.	DEC	2016	56	12					2388	2400		10.1021/acs.jcim.6b00362
J	Allen, TEH; Goodman, JM; Gutsell, S; Russell, PJ				Allen, Timothy E. H.; Goodman, Jonathan M.; Gutsell, Steve; Russell, Paul J.			A History of the Molecular Initiating Event	CHEMICAL RESEARCH IN TOXICOLOGY			English	Article							ADVERSE OUTCOME PATHWAYS; HEALTH-RISK ASSESSMENT; IN-SILICO PROFILER; SKIN SENSITIZATION; CONCEPTUAL-FRAMEWORK; END-POINTS; TOXICITY; TOXICOLOGY; CHEMICALS; MODE	The adverse outcome pathway (AOP) framework provides an alternative to traditional in vivo experiments for the risk assessment of chemicals. AOPs consist of a number of key events (KEs) linked by key event relationships across a range of biological organization backed by scientific evidence. The first ICE in the pathway is the molecular initiating event (MIE) the initial chemical trigger that sta…	Unilever	The authors acknowledge financial support from Unilever.	Aardema MJ, 2002, MUTAT RES-FUND MOL M, V499, P13, DOI 10.1016/S0027-5107(01)00292-5; Allen TEH, 2014, CHEM RES TOXICOL, V27, P2100, DOI 10.1021/tx500345j; ANDERSEN ME, 1987, TOXICOL APPL PHARM, V87, P185, DOI 10.1016/0041-008X(87)90281-X; Angrish MM, 2015, CHEM RES TOXICOL, V28, P551, DOI 10.1021/acs.chemrestox.5b00024; Ankley GT, 2010, ENVIRON TOXICOL CHEM, V29, P730, DOI 10.1002/etc.34; Aptula…	61	0	0	2	9	AMER CHEMICAL SOC	WASHINGTON	1155 16TH ST, NW, WASHINGTON, DC 20036 USA	0893-228X	1520-5010		CHEM RES TOXICOL	Chem. Res. Toxicol.	DEC	2016	29	12					2060	2070		10.1021/acs.chemrestox.6b00341
J	Lin, JM; Tsai, YT; Liu, YH; Lin, Y; Tai, HC; Chen, CS				Lin, Jun-Mu; Tsai, Yu-Ting; Liu, Yu-Hsuan; Lin, Yun; Tai, Hwan-Ching; Chen, Chien-Sheng			Identification of 2-oxohistidine Interacting Proteins Using E-coli Proteome Chips	MOLECULAR & CELLULAR PROTEOMICS			English	Article							TANDEM MASS-SPECTROMETRY; METAL-CATALYZED OXIDATION; TRANSFER-RNA SYNTHETASE; BETA-AMYLOID PEPTIDE; AMINO-ACID-ANALYSIS; FLUORESCENCE POLARIZATION; ALZHEIMERS-DISEASE; POSTTRANSLATIONAL MODIFICATION; CU(II)-CATALYZED OXIDATION; SUPEROXIDE-DISMUTASE	Cellular proteins are constantly damaged by reactive oxygen species generated by cellular respiration. Because of its metal-chelating property, the histidine residue is easily oxidized in the presence of Cu/Fe ions and H2O2 via metal-catalyzed oxidation, usually converted to 2-oxohistidine. We hypothesized that cells may have evolved antioxidant defenses against the generation of 2-oxohistidine r…	Ministry of Science and Technology, R.O.C. [MOST 104-2320-B-008-002-MY3, MOST 104-2627-M-008-001]; Aim for the Top University Project [104G705-4]; Cathay General Hospital [104CGH-NCU-A1]; Landseed Hospital, Taiwan [NCU-LSH-104-A-001]; MOST [103-2113-M-002-007-MY2]	CSC was supported by the Ministry of Science and Technology, R.O.C. (MOST 104-2320-B-008-002-MY3 and MOST 104-2627-M-008-001), the Aim for the Top University Project (104G705-4), the Cathay General Hospital (104CGH-NCU-A1) and the Landseed Hospital, Taiwan (NCU-LSH-104-A-001). HCT was supported by grant MOST 103-2113-M-002-007-MY2.	Leon E, 2009, NUCLEIC ACIDS RES, V37, pD629, DOI 10.1093/nar/gkn853; Ashburner M, 2000, NAT GENET, V25, P25; Atwood CS, 2000, CELL MOL BIOL, V46, P777; Berman HM, 2000, NUCLEIC ACIDS RES, V28, P235, DOI 10.1093/nar/28.1.235; Bonifati V, 2003, SCIENCE, V299, P256, DOI 10.1126/science.1077209; Boyer R. F., 2005, CONCEPTS BIOCH; Brock M, 2002, EUR J BIOCHEM, V269, P6184, DOI 10.1046/j.1432-1033.2002…	80	0	0	4	7	AMER SOC BIOCHEMISTRY MOLECULAR BIOLOGY INC	BETHESDA	9650 ROCKVILLE PIKE, BETHESDA, MD 20814-3996 USA	1535-9476	1535-9484		MOL CELL PROTEOMICS	Mol. Cell. Proteomics	DEC	2016	15	12					3581	3593		10.1074/mcp.M116.060806
J	Vasaikar, S; Bhatia, P; Bhatia, PG; Yaiw, KC				Vasaikar, Suhas; Bhatia, Pooja; Bhatia, Partap G.; Yaiw, Koon Chu			Complementary Approaches to Existing Target Based Drug Discovery for Identifying Novel Drug Targets	BIOMEDICINES			English	Review						drug discovery; drug design; drug targets; repositioning; molecular imaging	RESEARCH-AND-DEVELOPMENT; DEVELOPMENT SUCCESS RATES; STEM-CELL TECHNOLOGY; HUMAN-DISEASE; PHARMACEUTICAL-INDUSTRY; INVESTIGATIONAL DRUGS; ANIMAL-MODELS; MOUSE MODELS; HUMAN GENOME; CANCER	In the past decade, it was observed that the relationship between the emerging New Molecular Entities and the quantum of R&D investment has not been favorable. There might be numerous reasons but few studies stress the introduction of target based drug discovery approach as one of the factors. Although a number of drugs have been developed with an emphasis on a single protein target, yet identifi…			Alabaster V, 2002, TRENDS PHARMACOL SCI, V23, P13, DOI 10.1016/S0165-6147(00)01882-4; Ashburn TT, 2004, NAT REV DRUG DISCOV, V3, P673, DOI 10.1038/nrd1468; Baker A., 2005, J COMMERCIAL BIOTECH, V12, P45, DOI 10.1057/palgrave.jcb.3040147; Berman HM, 2000, NUCLEIC ACIDS RES, V28, P235, DOI 10.1093/nar/28.1.235; Betz UAK, 2005, DRUG DISCOV TODAY, V10, P1057, DOI 10.1016/S1359-6446(05)03498-7; Bollag…	92	0	0	4	15	MDPI AG	BASEL	ST ALBAN-ANLAGE 66, CH-4052 BASEL, SWITZERLAND	2227-9059			BIOMEDICINES	Biomedicines	DEC	2016	4	4							27	10.3390/biomedicines4040027
J	Ghosh, M; Niyogi, S; Bhattacharyya, M; Adak, M; Nayak, DK; Chakrabarti, S; Chakrabartil, P				Ghosh, Mainak; Niyogi, Sougata; Bhattacharyya, Madhumita; Adak, Moumita; Nayak, Dipak K.; Chakrabarti, Saikat; Chakrabartil, Partha			Ubiquitin Ligase COP1 Controls Hepatic Fat Metabolism by Targeting ATGL for Degradation	DIABETES			English	Article							ADIPOSE TRIGLYCERIDE LIPASE; REGULATES C-JUN; LIVER-DISEASE; INSULIN-RESISTANCE; PROTEIN-STRUCTURE; LIPID DROPLETS; E3 LIGASE; LIPOLYSIS; EXPRESSION; MICE	Optimal control of hepatic lipid metabolism is critical for organismal metabolic fitness. In liver, adipose triglyceride lipase (ATGL) serves as a major triacylglycerol (TAG) lipase and controls the bulk of intracellular lipid turnover. However, regulation of ATGL expression and its functional implications in hepatic lipid metabolism, particularly in the context of fatty liver disease, is unclear…	Council of Scientific and Industrial Research, India; Department of Science and Technology-Innovation in Science Pursuit for Inspired Research; University Grants Commission, India; Council of Scientific and Industrial Research, India [BSC 0121, BSC 0206]; Department of Science and Technology, Ministry of Science and Technology, India [SB/S0/BB/007/2013]	M.G., M.B., and D.K.N. received research fellowships from the Council of Scientific and Industrial Research, India. S.N. and M.A. received research fellowships from the Department of Science and Technology-Innovation in Science Pursuit for Inspired Research and University Grants Commission, India, respectively. This work was supported by Council of Scientific and Industrial Research, India, grant…	Ahmed A, 2015, CLIN GASTROENTEROL H, V13, P2062, DOI 10.1016/j.cgh.2015.07.029; Berman HM, 2000, NUCLEIC ACIDS RES, V28, P235, DOI 10.1093/nar/28.1.235; Chakrabarti P, 2013, MOL CELL BIOL, V33, P3659, DOI 10.1128/MCB.01584-12; Chakrabarti P, 2010, DIABETES, V59, P775, DOI 10.2337/db09-1602; Chakrabarti P, 2009, J BIOL CHEM, V284, P13296, DOI 10.1074/jbc.C800241200; Chitraju C, 2013, J LIPID RES, …	49	2	2	3	7	AMER DIABETES ASSOC	ALEXANDRIA	1701 N BEAUREGARD ST, ALEXANDRIA, VA 22311-1717 USA	0012-1797	1939-327X		DIABETES	Diabetes	DEC	2016	65	12					3561	3572		10.2337/db16-0506
J	Li, M; Liu, FJ; Zhang, JZH				Li, Min; Liu, Fengjiao; Zhang, John Z. H.			TMFF-A Two-Bead Multipole Force Field for Coarse-Grained Molecular Dynamics Simulation of Protein	JOURNAL OF CHEMICAL THEORY AND COMPUTATION			English	Article							CLASSICAL DRUDE OSCILLATORS; ADENYLATE KINASE; ELECTROSTATIC INTERACTIONS; BIOMOLECULAR SIMULATION; 3-DIMENSIONAL STRUCTURE; MULTISCALE SIMULATIONS; ENERGY LANDSCAPE; HIV-1 PROTEASE; GAY-BERNE; MODEL	Coarse-grained (CG) models are desirable for studying large and complex biological systems. In this paper, we propose a new two-bead multipole force field (TMFF) in which electric multipoles up to the quadrupole are included in the CG force field. The inclusion of electric multipoles in the proposed CG force field enables a more realistic description of the anisotropic electrostatic interactions …	National Natural Science Foundation of China [21433004]; Ministry of Science and Technology of China [2016YFA0501700]; Shanghai Putuo District [2014-A-02]	This work was supported by the National Natural Science Foundation of China (Grant no. 21433004), Ministry of Science and Technology of China (Grant no. 2016YFA0501700), and Shanghai Putuo District (Grant 2014-A-02).	Alemani D, 2010, J CHEM THEORY COMPUT, V6, P315, DOI 10.1021/ct900457z; Ayton GS, 2009, CURR OPIN STRUC BIOL, V19, P138, DOI 10.1016/j.sbi.2009.03.001; Bahar I, 1997, J MOL BIOL, V266, P195, DOI 10.1006/jmbi.1996.0758; Bahar I, 1997, PROTEINS, V29, P292, DOI 10.1002/(SICI)1097-0134(199711)29:3<292::AID-PROT4>3.0.CO;2-D; Basdevant N, 2007, J PHYS CHEM B, V111, P9390, DOI 10.1021/jp0727190; Berman …	74	3	3	4	6	AMER CHEMICAL SOC	WASHINGTON	1155 16TH ST, NW, WASHINGTON, DC 20036 USA	1549-9618	1549-9626		J CHEM THEORY COMPUT	J. Chem. Theory Comput.	DEC	2016	12	12					6147	6156		10.1021/acs.jctc.6b00769
J	Patil, KK; Meshram, RJ; Gacche, RN				Patil, Kapil K.; Meshram, Rohan J.; Gacche, Rajesh N.			Effect of monohydroxylated flavonoids on glycation-induced lens opacity and protein aggregation	JOURNAL OF ENZYME INHIBITION AND MEDICINAL CHEMISTRY			English	Article						Cataractogenesis; flavonoids; glycation; protein aggregates	ALDOSE REDUCTASE; DIABETIC COMPLICATIONS; OXIDATIVE STRESS; BINDING; CATARACT; CRYSTALLINS; ENDPRODUCTS; MECHANISMS; INHIBITORS; STABILITY	Glycation-induced cataractogenesis and visual impairment is a major ophthalmic concern of altered sugar homeostasis in humans as well as animals. Searching antiglycating agents from natural sources is widely acknowledged as it can be made bioavailable through diet. The present study was designed to understand the positional suitability of hydroxylation in the flavonoid scaffold for maneuvering it…	DST-SERB, New Delhi [SR/SO/BB-0088/2012]; DST-SERB	Authors are thankful DST-SERB, New Delhi, for financial assistance (F. No. SR/SO/BB-0088/2012) and to Professor Pandit Vidyasagar, Vice Chancellor, SRTM University, for providing facilities and encouragement. KKP thanks DST-SERB for JRF.	Adrover M, 2014, BIOMACROMOLECULES, V15, P3449, DOI 10.1021/bm501077j; Ahmed N, 2005, DIABETES RES CLIN PR, V67, P3, DOI 10.1016/j.diabres.2004.09.004; Berman HM, 2000, NUCLEIC ACIDS RES, V28, P235, DOI 10.1093/nar/28.1.235; Birla SS, 2013, SCI WORLD J, DOI 10.1155/2013/796018; Bloemendal H, 2004, PROG BIOPHYS MOL BIO, V86, P407, DOI 10.1016/j.pbiomolbio.2003.11.012; Cervantes-Laurean D, 2006, J …	51	0	0	3	5	TAYLOR & FRANCIS LTD	ABINGDON	2-4 PARK SQUARE, MILTON PARK, ABINGDON OR14 4RN, OXON, ENGLAND	1475-6366	1475-6374		J ENZYM INHIB MED CH	J. Enzym. Inhib. Med. Chem.	DEC	2016	31			1			148	156		10.1080/14756366.2016.1180593
J	Itoh, T; Hibi, T; Suzuki, F; Sugimoto, I; Fujiwara, A; Inaka, K; Tanaka, H; Ohta, K; Fujii, Y; Taketo, A; Kimoto, H				Itoh, Takafumi; Hibi, Takao; Suzuki, Fumiko; Sugimoto, Ikumi; Fujiwara, Akihiro; Inaka, Koji; Tanaka, Hiroaki; Ohta, Kazunori; Fujii, Yutaka; Taketo, Akira; Kimoto, Hisashi			Crystal Structure of Chitinase ChiW from Paenibacillus sp str. FPU-7 Reveals a Novel Type of Bacterial Cell-Surface-Expressed Multi-Modular Enzyme Machinery	PLOS ONE			English	Article							CARBOHYDRATE-BINDING MODULES; X-RAY-DIFFRACTION; SP STRAIN FPU-7; BETA-1,3-GLUCANASE LIC16A; CLOSTRIDIUM-THERMOCELLUM; CATALYTIC DOMAINS; VIRULENCE FACTOR; HIGH-RESOLUTION; PROTEIN; CRYSTALLIZATION	The Gram-positive bacterium Paenibacillus sp. str. FPU-7 effectively hydrolyzes chitin by using a number of chitinases. A unique chitinase with two catalytic domains, ChiW, is expressed on the cell surface of this bacterium and has high activity towards various chitins, even crystalline chitin. Here, the crystal structure of ChiW at 2.1 angstrom resolution is presented and describes how the enzym…	High-Quality Protein Crystal Growth Experiment on JEM; FPU Promotion of Community Fund; Special Coordination Funds for Promoting Science and Technology of the Ministry of Education, Culture, Sports, Science and Technology, Japan; Japan Society for the Promotion of Science [25850234, 26450099, 16K08114]	This study was partially supported by the "High-Quality Protein Crystal Growth Experiment on JEM" promoted by JAXA (Japan Aerospace Exploration Agency). This work was also supported by a grant from the FPU Promotion of Community Fund, by the Special Coordination Funds for Promoting Science and Technology of the Ministry of Education, Culture, Sports, Science and Technology, Japan and by a Grant-i…	Aam BB, 2010, MAR DRUGS, V8, P1482, DOI 10.3390/md8051482; ALTSCHUL SF, 1990, J MOL BIOL, V215, P403, DOI 10.1006/jmbi.1990.9999; Berisio R, PROTEIN PEPT LETT, V19, P1045; Berman HM, 2000, NUCLEIC ACIDS RES, V28, P235, DOI 10.1093/nar/28.1.235; BRADFORD MM, 1976, ANAL BIOCHEM, V72, P248, DOI 10.1006/abio.1976.9999; Carvalho AL, 2003, P NATL ACAD SCI USA, V100, P13809, DOI 10.1073/pnas.1936124100;…	58	0	0	2	4	PUBLIC LIBRARY SCIENCE	SAN FRANCISCO	1160 BATTERY STREET, STE 100, SAN FRANCISCO, CA 94111 USA	1932-6203			PLOS ONE	PLoS One	2018-12-01	2016	11	12							e0167310	10.1371/journal.pone.0167310
J	Filippova, EV; Wawrzak, Z; Ruan, J; Pshenychnyi, S; Schultz, RM; Wolfe, AJ; Anderson, WF				Filippova, Ekaterina V.; Wawrzak, Zdzislaw; Ruan, Jiapeng; Pshenychnyi, Sergii; Schultz, Richard M.; Wolfe, Alan J.; Anderson, Wayne F.			Crystal structure of nonphosphorylated receiver domain of the stress response regulator RcsB from Escherichia coli	PROTEIN SCIENCE			English	Article						transcriptional regulator; Rcs phosphorelay; two-component signal transduction system; phosphorylation domain; FixJ/NarL family	2-COMPONENT SYSTEM; STREPTOCOCCUS-PNEUMONIAE; KLEBSIELLA-PNEUMONIAE; THERMOTOGA-MARITIMA; MOLECULAR-GRAPHICS; ERWINIA-AMYLOVORA; BIOFILM FORMATION; ENVELOPE STRESS; PROTEINS RCSA; PHOSPHORELAY	RcsB, the transcription-associated response regulator of the Rcs phosphorelay two-component signal transduction system, activates cell stress responses associated with desiccation, cell wall biosynthesis, cell division, virulence, biofilm formation, and antibiotic resistance in enteric bacterial pathogens. RcsB belongs to the FixJ/NarL family of transcriptional regulators, which are characterized…	Argonne National Laboratory, University of Chicago Argonne, LLC; U.S. Department of Energy, Office of Biological and Environmental Research [DE-AC02-06CH11357]; Michigan Economic Development Corporation; Michigan Technology Tri-Corridor [085P1000817]; National Institute of Allergy and Infectious Diseases, National Institutes of Health, Department of Health and Human Services [HHSN272200700058C, H…	Grant sponsor: Argonne National Laboratory, University of Chicago Argonne, LLC, U.S. Department of Energy, Office of Biological and Environmental Research; Grant number: DE-AC02-06CH11357; Grant sponsor: Michigan Economic Development Corporation and the Michigan Technology Tri-Corridor; Grant number: 085P1000817; Grant sponsors: National Institute of Allergy and Infectious Diseases, National Inst…	Adams PD, 2010, ACTA CRYSTALLOGR D, V66, P213, DOI 10.1107/S0907444909052925; Ahn DR, 2013, INT J BIOL MACROMOL, V54, P76, DOI 10.1016/j.ijbiomac.2012.12.003; Bachhawat P, 2007, J BACTERIOL, V189, P5987, DOI 10.1128/JB.00049-07; Baikalov I, 1996, BIOCHEMISTRY-US, V35, P11053, DOI 10.1021/bi960919o; Bent CJ, 2004, J BACTERIOL, V186, P2872, DOI 10.1128/JB.186.9.2872-2879.2004; Berman HM, 2000, NUCL…	54	2	2	1	7	WILEY-BLACKWELL	HOBOKEN	111 RIVER ST, HOBOKEN 07030-5774, NJ USA	0961-8368	1469-896X		PROTEIN SCI	Protein Sci.	DEC	2016	25	12					2216	2224		10.1002/pro.3050
J	Heimer, G; Keratar, JM; Riley, LG; Balasubramaniam, S; Eyal, E; Pietikainen, LP; Hiltunen, JK; Marek-Yagel, D; Hamada, J; Gregory, A; Rogers, C; Hogarth, P; Nance, MA; Shalva, N; Veber, A; Tzadok, M; Nissenkorn, A; Tonduti, D; Renaldo, F; Kraoua, I; Panteghini, C; Valletta, L; Garavaglia, B; Cowley, MJ; Gayevskiy, V; Roscioli, T; Silberstein, JM; Hoffmann, C; Raas-Rothschild, A; Tiranti, V; Aniks…				Heimer, Gali; Keraetaer, Juha M.; Riley, Lisa G.; Balasubramaniam, Shanti; Eyal, Eran; Pietikaeinen, Laura P.; Hiltunen, J. Kalervo; Marek-Yagel, Dina; Hamada, Jeffrey; Gregory, Allison; Rogers, Caleb; Hogarth, Penelope; Nance, Martha A.; Shalva, Nechama; Veber, Alvit; Tzadok, Michal; Nissenkorn, Andreea; Tonduti, Davide; Renaldo, Florence; Kraoua, Ichraf; Panteghini, Celeste; Valletta, Lorella; …		U Of Washington Ctr For Mendelian	MECR Mutations Cause Childhood-Onset Dystonia and Optic Atrophy, a Mitochondrial Fatty Acid Synthesis Disorder	AMERICAN JOURNAL OF HUMAN GENETICS			English	Article							2-ENOYL THIOESTER REDUCTASE; COLI SHUTTLE VECTORS; SYNTHESIS TYPE-II; LIPOIC ACID; SACCHAROMYCES-CEREVISIAE; RESTRICTION SITES; PROTEIN STABILITY; POINT MUTATIONS; PREDICTION; PATHWAY	Mitochondrial fatty acid synthesis (mtFAS) is an evolutionarily conserved pathway essential for the function of the respiratory chain and several mitochondrial enzyme complexes. We report here a unique neurometabolic human disorder caused by defective mtFAS. Seven individuals from five unrelated families presented with childhood-onset dystonia, optic atrophy, and basal ganglia signal abnormalitie…	Israel Science Foundation [2023/14]; Sigrid Juselius Foundation; Academy of Finland; NBIA Disorders Association; National Human Genome Research Institute and the National Heart, Lung and Blood Institute [2UM1HG006493]; New South Wales Office of Health and Medical Research Council Sydney Genomics Collaborative NHMRC [1026891]; Cancer Institute NSW [13/ECF/1-46]; Kinghorn Foundation; Pierfranco and…	The authors would like to acknowledge the families for their collaboration. The Israeli group was supported by funds from the Israel Science Foundation (grant number 2023/14) and the Pinchas Borenstein Talpiot Medical Leadership Program. The Finnish group was supported by the Sigrid Juselius Foundation and the Academy of Finland. The American group was funded by the NBIA Disorders Association and…	Adzhubei IA, 2010, NAT METHODS, V7, P248, DOI 10.1038/nmeth0410-248; Berman HM, 2000, NUCLEIC ACIDS RES, V28, P235, DOI 10.1093/nar/28.1.235; Brody S, 1997, FEBS LETT, V408, P217, DOI 10.1016/S0014-5793(97)00428-6; Campbell SE, 2004, J BIOL CHEM, V279, P36235, DOI 10.1074/jbc.M400566200; Capriotti E, 2005, NUCLEIC ACIDS RES, V33, pW306, DOI 10.1093/nar/gki375; Chen C, 2014, J BIOL CHEM, V289, P17…	58	2	2	1	5	CELL PRESS	CAMBRIDGE	600 TECHNOLOGY SQUARE, 5TH FLOOR, CAMBRIDGE, MA 02139 USA	0002-9297	1537-6605		AM J HUM GENET	Am. J. Hum. Genet.	2018-12-01	2016	99	6					1229	1244		10.1016/j.ajhg.2016.09.021
J	Kochubei, T; Kitam, V; Maksymchuk, O; Piven, O; Lukash, L				Kochubei, Tetiana; Kitam, Volodymyr; Maksymchuk, Oksana; Piven, Oksana; Lukash, Lyubov			lPossible mechanisms of Leukoagglutinin induced apoptosis in human cells in vitro	CELL BIOLOGY INTERNATIONAL			English	Article						cancer cells; docking; isolectin; lectin; phytohemagglutinin	PLANT-PROTEINS; RECEPTOR; LECTINS; THERAPY; BIOLOGY; SERIES	Leukoagglutinin is one of the phytohemagglutinin isolectins isolated from Phaseolus vulgaris. In our recent study, we showed that this lectin is able to influence the growth of human cancer cells in vitro. In addition, using the acridine orange and ethidium bromide staining, we found that leukoagglutinin can induce apoptosis. In order to understand the molecular mechanisms of induction of apoptos…			Antonyuk VO, 2005, LECTINS THEIRS SOURC; Berg J. M., 2002, BIOCHEMISTRY; Berman HM, 2000, NUCLEIC ACIDS RES, V28, P235, DOI 10.1093/nar/28.1.235; Burz C, 2009, ACTA ONCOL, V48, P811, DOI 10.1080/02841860902974175; Carter PH, 2001, P NATL ACAD SCI USA, V98, P11879, DOI 10.1073/pnas.211178398; Chodorge M, 2012, CELL DEATH DIFFER, V19, P1187, DOI 10.1038/cdd.2011.208; Chunhua R, 2013, ESSENTIALS MES…	28	1	1	3	6	WILEY-BLACKWELL	HOBOKEN	111 RIVER ST, HOBOKEN 07030-5774, NJ USA	1065-6995	1095-8355		CELL BIOL INT	Cell Biol. Int.	DEC	2016	40	12					1313	1319		10.1002/cbin.10683
J	Szalaj, P; Tang, ZH; Michalski, P; Pietal, MJ; Luo, OJ; Sadowski, M; Li, XW; Radew, K; Ruan, YJ; Plewczynski, D				Szalaj, Przemyslaw; Tang, Zhonghui; Michalski, Paul; Pietal, Michal J.; Luo, Oscar J.; Sadowski, Michat; Li, Xingwang; Radew, Kamen; Ruan, Yijun; Plewczynski, Dariusz			An integrated 3-Dimensional Genome Modeling Engine for data-driven simulation of spatial genome organization	GENOME RESEARCH			English	Article							CHIA-PET DATA; CHROMATIN INTERACTIONS; 3D STRUCTURE; RECONSTRUCTION; TRANSCRIPTION; DOMAINS; PRINCIPLES; MAPS; VISUALIZATION; INTERACTOME	ChIA-PET is a high-throughput mapping technology that reveals long-range chromatin interactions and provides insights into the basic principles of spatial genome organization and gene regulation mediated by specific protein factors. Recently, we showed that a single ChIA-PET experiment provides information at all genomic scales of interest, from the high-resolution locations of binding sites and …	Polish National Science Centre [2014/15/B/ST6/05082, 2013/09/B/NZ2/00121]; European Cooperation in Science and Technology action (COST) [BM1405, BM1408]; National Leading Research Centre in Bialystok; European Union under European Social Fund; National Cancer Institute (NCI) grant [R01 CA186714]; National Institutes of Health grant, "Nucleome Positioning System for Spatiotemporal Genome Organizat…	D.P., P.S., M.S., and M.J.P. are supported by grants from the Polish National Science Centre (2014/15/B/ST6/05082 and 2013/09/B/NZ2/00121), and the European Cooperation in Science and Technology action (COST BM1405 and BM1408). P.S. and D.P. are supported by funds from National Leading Research Centre in Bialystok and the European Union under the European Social Fund. Y.R. is supported by the Dir…	Bau D, 2012, METHODS, V58, P300, DOI 10.1016/j.ymeth.2012.04.004; Bau D, 2011, NAT STRUCT MOL BIOL, V18, P107, DOI 10.1038/nsmb.1936; Belmont AS, 2014, CURR OPIN CELL BIOL, V26, P69, DOI 10.1016/j.ceb.2013.10.002; Berman HM, 2000, NUCLEIC ACIDS RES, V28, P235, DOI 10.1093/nar/28.1.235; DeLano W, 2002, PYMOL MOL GRAPHICS S; Demsar J, 2013, J MACH LEARN RES, V14, P2349; Dixon JR, 2012, NATURE, V485…	44	3	3	6	17	COLD SPRING HARBOR LAB PRESS, PUBLICATIONS DEPT	COLD SPRING HARBOR	1 BUNGTOWN RD, COLD SPRING HARBOR, NY 11724 USA	1088-9051	1549-5469		GENOME RES	Genome Res.	DEC	2016	26	12					1697	1709		10.1101/gr.205062.116
J	Montiel-Garcia, DJ; Mannige, RV; Reddy, VS; Carrillo-Tripp, M				Montiel-Garcia, Daniel J.; Mannige, Ranjan V.; Reddy, Vijay S.; Carrillo-Tripp, Mauricio			Structure based sequence analysis of viral and cellular protein assemblies	JOURNAL OF STRUCTURAL BIOLOGY			English	Article						Viral capsid proteins; Sequence conservation; Protein-protein interactions; Subunit interface; Bioinformatics; Protein complexes	INTERFACES; CONSERVATION; DATABASE; SIMILARITY; ALIGNMENT; MUTATION; VIRUSES; PHAGE	It is well accepted that, in general, protein structural similarity is strongly related to the amino acid sequence identity. To analyze in great detail the correlation, distribution and variation levels of conserved residues in the protein structure, we analyzed all available high-resolution structural data of 5245 cellular complex-forming proteins and 293 spherical virus capsid proteins (VCPs). …	USA National Institutes of Health (NIH) [RR012255]; Mexican Consejo Nacional de Ciencia y Tecnologia (Conacyt) [132376]; Fulbright-Garcia Robles funding by USA J. William Fulbright Scholarship Board	We acknowledge the thoughtful suggestions of the editor and reviewers which greatly improved this article. V.S.R and M.C.T. would also like to acknowledge the discussions with Professor Charles L. Brooks III at the inception of this work. M.C.T. would like to thank Dr. Johan Van Horebeek from the Computer Science Department, CIMAT, Mexico, for his helpful advice on the statistical methodology. Th…	Abroi A, 2011, BIOESSAYS, V33, P626, DOI 10.1002/bies.201000126; Bahadur RP, 2008, PROTEINS, V71, P407, DOI 10.1002/prot.21710; Bahadur RP, 2007, J MOL BIOL, V367, P574, DOI 10.1016/j.jmb.2006.12.054; Berman HM, 2000, NUCLEIC ACIDS RES, V28, P235, DOI 10.1093/nar/28.1.235; Caffrey DR, 2004, PROTEIN SCI, V13, P190, DOI 10.1110/ps.03323604; Cann J.A., 2005, PRINCIPLES MOL VIROL; Carrillo-Tripp M, 2…	41	0	0	3	6	ACADEMIC PRESS INC ELSEVIER SCIENCE	SAN DIEGO	525 B ST, STE 1900, SAN DIEGO, CA 92101-4495 USA	1047-8477	1095-8657		J STRUCT BIOL	J. Struct. Biol.	DEC	2016	196	3					299	308		10.1016/j.jsb.2016.07.013
J	Kumar, P; Bansal, M				Kumar, Prasun; Bansal, Manju			Structural and functional analyses of PolyProline-II helices in globular proteins	JOURNAL OF STRUCTURAL BIOLOGY			English	Article						PPII-helix; ASSP; Amino acid propensity; Isolated strands	RAMAN OPTICAL-ACTIVITY; SECONDARY STRUCTURE; UNFOLDED PROTEINS; CRYSTAL-STRUCTURE; CIRCULAR-DICHROISM; DATA-BANK; CONFORMATION; PROLINE; ALPHA; RESOLUTION	PolyProline-II (PPII) helices are defined as a continuous stretch of a protein chain in which the constituent residues have backbone torsion angle (phi, psi) values of (-75 degrees, 145 degrees) and take up an extended left handed helical conformation, without any intra-chain hydrogen bonds. They are found to occur quite frequently in protein structures, with their number exceeding that of pi-hel…			ADZHUBEI AA, 1993, J MOL BIOL, V229, P472, DOI 10.1006/jmbi.1993.1047; ADZHUBEI AA, 1987, BIOCHEM BIOPH RES CO, V146, P934, DOI 10.1016/0006-291X(87)90736-4; Adzhubei AA, 2013, J MOL BIOL, V425, P2100, DOI 10.1016/j.jmb.2013.03.018; Axelrod HL, 2010, ACTA CRYSTALLOGR F, V66, P1335, DOI 10.1107/S1744309110020166; Babic AC, 2008, J MOL BIOL, V383, P186, DOI 10.1016/j.jmb.2008.08.032; Beck K, 1998, …	73	1	1	4	7	ACADEMIC PRESS INC ELSEVIER SCIENCE	SAN DIEGO	525 B ST, STE 1900, SAN DIEGO, CA 92101-4495 USA	1047-8477	1095-8657		J STRUCT BIOL	J. Struct. Biol.	DEC	2016	196	3					414	425		10.1016/j.jsb.2016.09.006
J	Bietz, S; Fahrrolfes, R; Rarey, M				Bietz, Stefan; Faehrrolfes, Rainer; Rarey, Matthias			The Art of Compiling Protein Binding Site Ensembles	MOLECULAR INFORMATICS			English	Article; Proceedings Paper	5th Biannual Strasbourg Summer Schools in Chemoinformatics (CS3)	JUN 27-JUL 01, 2016	Strasbourg, FRANCE			protein structure ensembles; protein data bank; protein binding sites; protein-ligand interactions; flexible docking	PROTONATION STATES; LIGAND COMPLEXES; WEB APPLICATION; HYDROGEN-ATOMS; DOCKING; ASSIGNMENT; ALIGNMENT; CONFORMATIONS; VISUALIZATION; OPTIMIZATION	Structure-based drug design starts with the collection, preparation, and initial analysis of protein structures. With more than 115,000 structures publically available in the Protein Data Bank (PDB), fully automated processes reliably performing these important preprocessing steps are needed. Several tools are available for these tasks, however, most of them do not address the special needs of sc…			ALTSCHUL SF, 1990, J MOL BIOL, V215, P403, DOI 10.1006/jmbi.1990.9999; Amaro RE, 2008, P NATL ACAD SCI USA, V105, P17278, DOI 10.1073/pnas.0805820105; Amaro RE, 2008, J COMPUT AID MOL DES, V22, P693, DOI 10.1007/s10822-007-9159-2; Barril X, 2005, J MED CHEM, V48, P4432, DOI 10.1021/jm048972v; BASS MB, 1992, PROTEINS, V12, P266, DOI 10.1002/prot.340120305; Bayden AS, 2009, J COMPUT AID MOL DES, V2…	43	1	1	4	7	WILEY-V C H VERLAG GMBH	WEINHEIM	POSTFACH 101161, 69451 WEINHEIM, GERMANY	1868-1743	1868-1751		MOL INFORM	Mol. Inf.	DEC	2016	35	2018-11-12					593	598		10.1002/minf.201600043
J	Muller, AT; Kaymaz, AC; Gabernet, G; Posselt, G; Wessler, S; Hiss, JA; Schneider, G				Muller, Alex T.; Kaymaz, Aral C.; Gabernet, Gisela; Posselt, Gernot; Wessler, Silja; Hiss, Jan A.; Schneider, Gisbert			Sparse Neural Network Models of Antimicrobial Peptide-Activity Relationships	MOLECULAR INFORMATICS			English	Article; Proceedings Paper	5th Biannual Strasbourg Summer Schools in Chemoinformatics (CS3)	JUN 27-JUL 01, 2016	Strasbourg, FRANCE			antibiotic; deep learning; evolutionary algorithm; machine learning; molecular dynamics simulation; structure-activity relationship	AMINO-ACID-SEQUENCES; SIMULATED MOLECULAR EVOLUTION; DRUG DISCOVERY; BIG DATA; DYNAMICS; PREDICTION; DESIGN; CLASSIFICATION; SELECTION; REGULARIZATION	We present an adaptive neural network model for chemical data classification. The method uses an evolutionary algorithm for optimizing the network structure by seeking sparsely connected architectures. The number of hidden layers, the number of neurons in each layer and their connectivity are free variables of the system. We used the method for predicting antimicrobial peptide activity from the a…			Abraham Mark James, 2015, SoftwareX, V1-2, P19, DOI 10.1016/j.softx.2015.06.001; Agatonovic-Kustrin S, 2000, J PHARMACEUT BIOMED, V22, P717, DOI 10.1016/S0731-7085(99)00272-1; Augasta MG, 2013, OPEN COMPUT SCI, V3, P105, DOI 10.2478/s13537-013-0109-x; Awasthi N., 2016, J CHEM THEO IN PRESS; Basak SC, 2015, CURR COMPUT-AID DRUG, V11, P197, DOI 10.2174/157340991103151124190920; Baskin Igor I., 2008…	94	3	3	2	19	WILEY-V C H VERLAG GMBH	WEINHEIM	POSTFACH 101161, 69451 WEINHEIM, GERMANY	1868-1743	1868-1751		MOL INFORM	Mol. Inf.	DEC	2016	35	2018-11-12					606	614		10.1002/minf.201600029
J	Ichiye, T				Ichiye, Toshiko			What makes proteins work: exploring life in P-T-X	PHYSICAL BIOLOGY			English	Article						proteins; enzyme; structure-function of enzymes; extremophiles; flexibility-stability; pressure adaptation; piezophiles	THERMOPHILIC PROTEINS; DYNAMICS; CONFORMATIONS; TEMPERATURE; STABILITY; NMR	Although considerable progress has been made in the molecular biophysics of proteins, it is still not possible to reliably design an enzyme for a given function. The current understanding of enzyme function is that both structure and flexibility are important. Much attention has been focused recently on protein folding and thus structure, spurred on by insights from the folding funnel concept. Fo…	National Science Foundation [CHE-1464766]; National Institutes of Health [R21-GM104500]; McGowan Foundation	The author is grateful for support from the National Science Foundation through Grant No. CHE-1464766, from the National Institutes of Health through Grant No. R21-GM104500, and from the McGowan Foundation. This work is a contribution to the Deep Carbon Observatory (DCO). She also thanks Dr Russell J Hemley and Dr Jocelyn M Rodgers for comments on the manuscript and other members of the DCO for h…	Ando N, 2008, BIOCHEMISTRY-US, V47, P11097, DOI 10.1021/bi801287m; Anthony D. J., 2012, P NATL ACAD SCI USA, V109, P6945; Berezovsky IN, 2005, P NATL ACAD SCI USA, V102, P12742, DOI 10.1073/pnas.0503890102; Berman HM, 2000, NUCLEIC ACIDS RES, V28, P235, DOI 10.1093/nar/28.1.235; Collins MD, 2011, ANNU REV BIOPHYS, V40, P81, DOI 10.1146/annurev-biophys-042910-155304; Feller G., 2013, SCIENTIFICA, …	29	1	1	2	7	IOP PUBLISHING LTD	BRISTOL	TEMPLE CIRCUS, TEMPLE WAY, BRISTOL BS1 6BE, ENGLAND	1478-3967	1478-3975		PHYS BIOL	Phys. Biol.	DEC	2016	13	6							63001	10.1088/1478-3975/13/6/063001
J	McCafferty, CL; Sergeev, YV				McCafferty, Caitlyn L.; Sergeev, Yuri V.			In silico Mapping of Protein Unfolding Mutations for Inherited Disease	SCIENTIFIC REPORTS			English	Article							DOMINANT RETINITIS-PIGMENTOSA; AMINO-ACID VARIANTS; RHODOPSIN GENE; OCULAR FINDINGS; PERSONALIZED MEDICINE; DISULFIDE-ISOMERASE; MISSENSE MUTATIONS; POLYPEPTIDE-CHAIN; STABILITY CHANGES; MECHANISMS	The effect of disease-causing missense mutations on protein folding is difficult to evaluate. To understand this relationship, we developed the unfolding mutation screen (UMS) for in silico evaluation of the severity of genetic perturbations at the atomic level of protein structure. The program takes into account the protein-unfolding curve and generates propensities using calculated free energy …			Adzhubei IA, 2010, NAT METHODS, V7, P248, DOI 10.1038/nmeth0410-248; Alyass A, 2015, BMC MED GENOMICS, V8, DOI 10.1186/s12920-015-0108-y; ANFINSEN CB, 1961, P NATL ACAD SCI USA, V47, P1309, DOI 10.1073/pnas.47.9.1309; ANTINOLO G, 1994, HUM MOL GENET, V3, P1421, DOI 10.1093/hmg/3.8.1421; Araya CL, 2011, TRENDS BIOTECHNOL, V29, P435, DOI 10.1016/j.tibtech.2011.04.003; Bareil C, 1999, Ophthalmic Gen…	64	2	2	2	7	NATURE PUBLISHING GROUP	LONDON	MACMILLAN BUILDING, 4 CRINAN ST, LONDON N1 9XW, ENGLAND	2045-2322			SCI REP-UK	Sci Rep	2018-12-01	2016	6								37298	10.1038/srep37298
J	Katari, SK; Natarajan, P; Swargam, S; Kanipakam, H; Pasala, C; Umamaheswari, A				Katari, Sudheer Kumar; Natarajan, Pradeep; Swargam, Sandeep; Kanipakam, Hema; Pasala, Chiranjeevi; Umamaheswari, Amineni			Inhibitor design against JNK1 through e-pharmacophore modeling docking and molecular dynamics simulations	JOURNAL OF RECEPTORS AND SIGNAL TRANSDUCTION			English	Article						JNK1; cancer; e-pharmacophore; molecular docking; MD simulations	ACTIVATED PROTEIN-KINASES; JUN NH2-TERMINAL KINASE; N-TERMINAL KINASE; SIGNAL-TRANSDUCTION PATHWAY; C-JUN; BINDING; PHOSPHORYLATION; DISCOVERY; RECEPTOR; MKK7	c-Jun-NH2 terminal kinases (JNKs) come under a class of serine/threonine protein kinases and are encoded by three genes, namely JNK1, JNK2 and JNK3. Human JNK1 is a cytosolic kinase belonging to mitogen-activated protein kinase (MAPK) family, which plays a major role in intracrinal signal transduction cascade mechanism. Overexpressed human JNK1, a key kinase interacts with other kinases involved …	DBT; DBT, Ministry of Science and Technology [BT/BI/25/001/2006]	Katari Sudheer Kumar is highly thankful for sanctioning as DBT-JRF by DBT and authors are thankful to DBT, Ministry of Science and Technology for providing Bioinformatics facility through BIF program (BT/BI/25/001/2006).	Amineni U, 2010, J Chem Biol, V3, P165, DOI 10.1007/s12154-010-0039-1; Asaoka Y, 2010, J BIOCHEM, V148, P393, DOI 10.1093/jb/mvq098; Bain J, 2007, BIOCHEM J, V408, P297, DOI 10.1042/BJ20070797; Barillari C, 2007, J AM CHEM SOC, V129, P2577, DOI 10.1021/ja066980q; Bennett BL, 2001, P NATL ACAD SCI USA, V98, P13681, DOI 10.1073/pnas.251194298; Berman HM, 2000, NUCLEIC ACIDS RES, V28, P235, DOI 10.1…	68	0	0	0	8	TAYLOR & FRANCIS LTD	ABINGDON	2-4 PARK SQUARE, MILTON PARK, ABINGDON OR14 4RN, OXON, ENGLAND	1079-9893	1532-4281		J RECEPT SIG TRANSD	J. Recept. Signal Transduct.	DEC	2016	36	6					558	571		10.3109/10799893.2016.1141955
J	Schuler, A; Bornberg-Bauer, E				Schueler, Andreas; Bornberg-Bauer, Erich			Evolution of Protein Domain Repeats in Metazoa	MOLECULAR BIOLOGY AND EVOLUTION			English	Article						protein evolution; domain rearrangements; protein repeats; concerted evolution	MULTIPLE SEQUENCE ALIGNMENT; INTRINSICALLY UNSTRUCTURED PROTEINS; TANDEM REPEATS; DROSOPHILA-MELANOGASTER; MULTIDOMAIN PROTEINS; DISORDERED REGIONS; ADAPTIVE BENEFITS; FAMILIES DATABASE; LINEAR MOTIFS; GENE	Repeats are ubiquitous elements of proteins and they play important roles for cellular function and during evolution. Repeats are, however, also notoriously difficult to capture computationally and large scale studies so far had difficulties in linking genetic causes, structural properties and evolutionary trajectories of protein repeats. Here we apply recently developed methods for repeat detect…	Volkswagen Foundation [I/84830]; DFG [BO2544/4-1]	The authors thank E. Dohmen for assembling a protein sequence dataset corresponding to the RepeatsDB annotations. A.S. was supported by the Volkswagen Foundation Grant I/84830 and a DFG grant BO2544/4-1 to E.B-B. E.B-B's. ORCID is 0000-0002-1826-3576, ResID is A-1563-2013.	Alexa A, 2006, BIOINFORMATICS, V22, P1600, DOI 10.1093/bioinformatics/btl140; Andrade MA, 2001, J STRUCT BIOL, V134, P117, DOI 10.1006/jsbi.2001.4392; Apic G, 2001, J MOL BIOL, V310, P311, DOI 10.1006/jmbi.2001.4776; Apic Gordana, 2003, Journal of Structural and Functional Genomics, V4, P67, DOI 10.1023/A:1026113408773; Berman HM, 2000, NUCLEIC ACIDS RES, V28, P235, DOI 10.1093/nar/28.1.235; Bieg…	98	1	1	2	9	OXFORD UNIV PRESS	OXFORD	GREAT CLARENDON ST, OXFORD OX2 6DP, ENGLAND	0737-4038	1537-1719		MOL BIOL EVOL	Mol. Biol. Evol.	DEC	2016	33	12					3170	3182		10.1093/molbev/msw194
J	McIntosh, CA; Owens, DK				McIntosh, Cecilia A.; Owens, Daniel K.			Advances in flavonoid glycosyltransferase research: integrating recent findings with long-term citrus studies	PHYTOCHEMISTRY REVIEWS			English	Article; Proceedings Paper	PSNA Meeting	AUG 08-12, 2015	IL	PSNA		Structure/function; Substrate specificity; Biotechnological potential; Enzymology; Protein structure analysis	GLUCOSE ANTHOCYANIDIN 3-O-GLUCOSYLTRANSFERASE; RECOMBINANT EXPRESSION; EXOGENOUS FLAVANONES; MEDICAGO-TRUNCATULA; CRYSTAL-STRUCTURES; CLITORIA-TERNATEA; STRUCTURAL BASIS; CELL-CULTURES; NARINGIN; PARADISI	Flavonoid glycosides are required for a number of crucial roles in planta and have the potential for development in a variety of agricultural, medicinal, and biotechnological applications. A number of recent advancements have been made in characterizing glycosyltransferases, the enzymes that are responsible for the synthesis of these important molecules. In this review, glycosyltransferases are c…			Alam MA, 2014, ADV NUTR, V5, P404, DOI 10.3945/an.113.005603; BARPELED M, 1991, J BIOL CHEM, V266, P20953; BARPELED M, 1993, PLANT PHYSIOL, V103, P1377; BARTHE GA, 1987, J PLANT PHYSIOL, V127, P55; BARTHE GA, 1988, PHYTOCHEMISTRY, V27, P249, DOI 10.1016/0031-9422(88)80625-3; Benavente-Garcia O, 2008, J AGR FOOD CHEM, V56, P6185, DOI 10.1021/jf8006568; Benavente-Garcia O, 1997, J AGR FOOD CHEM, V4…	70	0	0	10	26	SPRINGER	DORDRECHT	VAN GODEWIJCKSTRAAT 30, 3311 GZ DORDRECHT, NETHERLANDS	1568-7767	1572-980X		PHYTOCHEM REV	Phytochem. Rev.	DEC	2016	15	6			SI		1075	1091		10.1007/s11101-016-9460-6
J	Peng, YH; Alexov, E				Peng, Yunhui; Alexov, Emil			Cofactors-loaded quaternary structure of lysine-specific demethylase 5C (KDM5C) protein: Computational model	PROTEINS-STRUCTURE FUNCTION AND BIOINFORMATICS			English	Article						KDM5C gene; quaternary structure; missense mutations; X-linked mental retardation; homology modeling; inter-domain interactions	LINKED MENTAL-RETARDATION; MOLECULAR-DYNAMICS; SIDE-CHAIN; MUTATIONS; DOMAIN; PREDICTION; STABILITY; SERVER; H3K4; METHYLATION	The KDM5C gene (also known as JARID1C and SMCX) is located on the X chromosome and encodes a ubiquitously expressed 1560-aa protein, which plays an important role in lysine methylation (specifically reverses tri- and di-methylation of Lys4 of histone H3). Currently, 13 missense mutations in KDM5C have been linked to X-linked mental retardation. However, the molecular mechanism of disease is curre…	NIH [R01GM093937]	Grant sponsor: NIH; Grant number: R01GM093937.	ALTSCHUL SF, 1990, J MOL BIOL, V215, P403, DOI 10.1006/jmbi.1990.9999; Bairagya HR, 2011, J BIOMOL STRUCT DYN, V29, P441; Bannister AJ, 2011, CELL RES, V21, P381, DOI 10.1038/cr.2011.22; Berman HM, 2000, NUCLEIC ACIDS RES, V28, P235, DOI 10.1093/nar/28.1.235; Biasini M, 2014, NUCLEIC ACIDS RES, V42, pW252, DOI 10.1093/nar/gku340; Bonasio R, 2010, SCIENCE, V330, P612, DOI 10.1126/science.1191078; …	56	0	0	2	5	WILEY	HOBOKEN	111 RIVER ST, HOBOKEN 07030-5774, NJ USA	0887-3585	1097-0134		PROTEINS	Proteins	DEC	2016	84	12					1797	1809		10.1002/prot.25162
J	Na, H; Song, G				Na, Hyuntae; Song, Guang			Predicting the functional motions of p97 using symmetric normal modes	PROTEINS-STRUCTURE FUNCTION AND BIOINFORMATICS			English	Article						symmetry; pore loop; threading; mechanism; dynamics; cooperativity	ELASTIC NETWORK MODELS; PANCREATIC TRYPSIN-INHIBITOR; AAA-ATPASE; PROTEIN; DYNAMICS; P97/VCP; PEPTIDASE; MECHANISM; ANGSTROM; DOMAINS	p97 is a protein complex of the AAA+ family. Although functions of p97 are well understood, the mechanism by which p97 performs its unfolding activities remains unclear. In this work, we present a novel way of applying normal mode analysis to study this six-fold symmetric molecular machine. By selecting normal modes that are axial symmetric and give the largest movements at D1 or D2 pore residues…	National Science Foundation [CCF-0953517]	Grant sponsor: National Science Foundation; Grant number: CCF-0953517.	Atilgan AR, 2001, BIOPHYS J, V80, P505; Banerjee S, 2016, SCIENCE, V351, P871, DOI 10.1126/science.aad7974; Barthelme D, 2016, J MOL BIOL, V428, P1861, DOI 10.1016/j.jmb.2015.11.015; Barthelme D, 2013, P NATL ACAD SCI USA, V110, P3327, DOI 10.1073/pnas.1300408110; Berman HM, 2000, NUCLEIC ACIDS RES, V28, P235, DOI 10.1093/nar/28.1.235; Beuron F, 2003, J MOL BIOL, V327, P619, DOI 10.1016/S0022-283…	40	2	2	0	2	WILEY-BLACKWELL	HOBOKEN	111 RIVER ST, HOBOKEN 07030-5774, NJ USA	0887-3585	1097-0134		PROTEINS	Proteins	DEC	2016	84	12					1823	1835		10.1002/prot.25164
J	Dybas, JM; Fiser, A				Dybas, Joseph M.; Fiser, Andras			Development of a motif-based topology-independent structure comparison method to identify evolutionarily related folds	PROTEINS-STRUCTURE FUNCTION AND BIOINFORMATICS			English	Article						fold evolution; structure classification; Smotif; super-secondary structure motif; structure comparison	PROTEIN-STRUCTURE ALIGNMENT; PSI-BETA-BARRELS; SECONDARY STRUCTURE; STRUCTURE LIBRARY; SWAPPED-HAIRPIN; STRUCTURE SPACE; SEQUENCE; UNIVERSE; SCOP; CATH	Structure conservation, functional similarities, and homologous relationships that exist across diverse protein topologies suggest that some regions of the protein fold universe are continuous. However, the current structure classification systems are based on hierarchical organizations, which cannot accommodate structural relationships that span fold definitions. Here, we describe a novel, super…	NIH [GM096041, GM118709]; National Science Foundation (Extreme Science and Engineering Discovery Environment) [ACI-1053575]	Grant sponsor: NIH; Grant numbers: GM096041 and GM118709; Grant sponsor: National Science Foundation (Extreme Science and Engineering Discovery Environment); Grant number: ACI-1053575.	Alva V, 2010, PROTEIN SCI, V19, P124, DOI 10.1002/pro.297; Andreeva A, 2008, NUCLEIC ACIDS RES, V36, pD419, DOI 10.1093/nar/gkm993; Andreeva A, 2006, CURR OPIN STRUC BIOL, V16, P399, DOI 10.1016/j.sbi.2006.04.003; Andreeva A, 2014, NUCLEIC ACIDS RES, V42, pD310, DOI 10.1093/nar/gkt1242; Berman HM, 2000, NUCLEIC ACIDS RES, V28, P235, DOI 10.1093/nar/28.1.235; Bonet J, 2014, BIOINFORMATICS, V30, P1…	85	1	1	0	0	WILEY	HOBOKEN	111 RIVER ST, HOBOKEN 07030-5774, NJ USA	0887-3585	1097-0134		PROTEINS	Proteins	DEC	2016	84	12					1859	1874		10.1002/prot.25169
J	Raschka, S; Bemister-Buffington, J; Kuhn, LA				Raschka, Sebastian; Bemister-Buffington, Joseph; Kuhn, Leslie A.			Detecting the native ligand orientation by interfacial rigidity: SiteInterlock	PROTEINS-STRUCTURE FUNCTION AND BIOINFORMATICS			English	Article						binding determinants; binding mode prediction; coupled interactions; docking; flexibility; interface features; ligand stabilization of proteins; ProFlex; protein stability; scoring functions	PROMOTE PROTEIN STABILITY; CRYSTAL-STRUCTURE; MOLECULAR RECOGNITION; CONFORMER GENERATION; BINDING-AFFINITY; SINGLE-PARAMETER; STRUCTURAL BASIS; DRUG DISCOVERY; ATOM CONTACTS; DATA-BANK	Understanding the physical attributes of protein-ligand interfaces, the source of most biological activity, is a fundamental problem in biophysics. Knowing the characteristic features of interfaces also enables the design of molecules with potent and selective interactions. Prediction of native protein-ligand interactions has traditionally focused on the development of physics-based potential ene…			Achari A, 1997, NAT STRUCT BIOL, V4, P490, DOI 10.1038/nsb0697-490; Ala PJ, 1998, J BIOL CHEM, V273, P12325, DOI 10.1074/jbc.273.20.12325; Allen WJ, 2015, J COMPUT CHEM, V36, P1132, DOI 10.1002/jcc.23905; Bahar I, 1998, BIOCHEMISTRY-US, V37, P1067, DOI 10.1021/bi9720641; Bahar I, 1997, FOLD DES, V2, P173, DOI 10.1016/S1359-0278(97)00024-2; Berman HM, 2000, NUCLEIC ACIDS RES, V28, P235, DOI 10.109…	77	1	1	1	1	WILEY	HOBOKEN	111 RIVER ST, HOBOKEN 07030-5774, NJ USA	0887-3585	1097-0134		PROTEINS	Proteins	DEC	2016	84	12					1888	1901		10.1002/prot.25172
J	Unsal, E; Degirmenci, B; Harmanda, B; Erman, B; Ozlu, N				Unsal, Esra; Degirmenci, Bahar; Harmanda, Busra; Erman, Burak; Ozlu, Nurhan			A small molecule identified through an in silico screen inhibits Aurora B-INCENP interaction	CHEMICAL BIOLOGY & DRUG DESIGN			English	Article						Aurora B kinase; selective kinase inhibitor; structure-based virtual screening	PROTEIN DATA-BANK; CELL-DIVISION; A ACTIVATION; KINASE; SPINDLE; PHOSPHORYLATION; GROWTH; TPX2; CYTOKINESIS; HESPERADIN	Aurora B is a serine/threonine kinase that has a central role in the regulation of mitosis. The observation of Aurora B overexpression in cancer makes it a promising target to develop antitumoral inhibitors. We describe a new potential inhibitor that exclusively targets the interaction site of Aurora B and its activator INCENP. We performed a structure-based virtual screening and determined five …	EMBO (European Molecular Biology Organization) Installation Grant, European Union Marie Curie Career Integration Grant	N. Ozlu is funded by EMBO (European Molecular Biology Organization) Installation Grant, European Union Marie Curie Career Integration Grant. Authors would like to thank Hyman Laboratory (MPI-CBG, Dresden) for the HeLa Kyoto cells stably expressing Aurora B-LAP-tagged BAC transgenes and Drs Nazan Saner and Aynur Kaya-Copur for the critical reading of the manuscript.	Bayliss R, 2003, MOL CELL, V12, P851, DOI 10.1016/S1097-2765(03)00392-7; Berman HM, 2000, NUCLEIC ACIDS RES, V28, P235, DOI 10.1093/nar/28.1.235; Bischoff JR, 1999, TRENDS CELL BIOL, V9, P454, DOI 10.1016/S0962-8924(99)01658-X; Bishop JD, 2002, J BIOL CHEM, V277, P27577, DOI 10.1074/jbc.C200307200; Carmena M, 2003, NAT REV MOL CELL BIO, V4, P842, DOI 10.1038/nrm1245; Carmena M, 2012, NAT REV MOL …	33	0	0	2	9	WILEY	HOBOKEN	111 RIVER ST, HOBOKEN 07030-5774, NJ USA	1747-0277	1747-0285		CHEM BIOL DRUG DES	Chem. Biol. Drug Des.	DEC	2016	88	6					783	794		10.1111/cbdd.12816
J	Alam, A; Ali, S; Ahamad, S; Malik, MZ; Ishrat, R				Alam, Aftab; Ali, Shahnawaz; Ahamad, Shahzaib; Malik, Md. Zubbair; Ishrat, Romana			From ZikV genome to vaccine: in silico approach for the epitope-based peptide vaccine against Zika virus envelope glycoprotein	IMMUNOLOGY			English	Article						artificial neural network; epitopes; Immune Epitope Database; immunogenomics; MHC class; Zika virus	T-CELL EPITOPES; PROTEIN CONFORMATION; CLASS-II; PREDICTION; MHC; ANTIGENS; DESIGN; TOOL; RESPONSES; ALIGNMENT	Zika virus (ZikV) has emerged as a potential threat to human health worldwide. A member of the Flaviviridae, ZikV is transmitted to humans by mosquitoes. It is related to other pathogenic vector-borne flaviviruses including dengue, West Nile and Japanese encephalitis viruses, but produces a comparatively mild disease in humans. As a result of its epidemic outbreak and the lack of potential medica…	ICMR-SRF PhD fellowship	The authors are grateful to the Centre for Interdisciplinary Research in Basic Sciences (CIRBSc), Jamia Millia Islamia-110025 for providing the research infrastructure and we gratefully acknowledge the IEDB team. Shahnwaz Ali and Md Zubbair Malik are supported by ICMR-SRF PhD fellowship.	Aftab ALAM, 2016, GLOB J, V5, P212; ALTSCHUL SF, 1990, J MOL BIOL, V215, P403, DOI 10.1006/jmbi.1990.9999; Apweiler R, 2004, NUCLEIC ACIDS RES, V32, pD115, DOI 10.1093/nar/gkh131; Berman HM, 2000, NUCLEIC ACIDS RES, V28, P235, DOI 10.1093/nar/28.1.235; Bourdette DN, 2005, MULT SCLER, V11, P552, DOI 10.1191/1352458505ms1225oa; Brusic V, 2004, METHODS, V34, P436, DOI 10.1016/j.ymeth.2004.06.006; Bu…	54	7	7	2	27	WILEY-BLACKWELL	HOBOKEN	111 RIVER ST, HOBOKEN 07030-5774, NJ USA	0019-2805	1365-2567		IMMUNOLOGY	Immunology	DEC	2016	149	4					386	399		10.1111/imm.12656
J	Murtaza, S; Abbas, A; Iftikhar, K; Shamim, S; Akhtar, MS; Razzaq, Z; Naseem, K; Elgorban, AM				Murtaza, Shahzad; Abbas, Aadil; Iftikhar, Kiran; Shamim, Saima; Akhtar, Muhammad Shoaib; Razzaq, Zobia; Naseem, Khadija; Elgorban, Abdallah Mohamed			Synthesis, biological activities and docking studies of novel 2,4-dihydroxybenzaldehyde based Schiff base	MEDICINAL CHEMISTRY RESEARCH			English	Article						Antioxidant; Antimicrobial; Enzyme inhibition; DNA binding; Molecular docking	DERIVATIVES; ANTIOXIDANT; AGENTS	The present study describes the synthesis and characterization of a series of novel Schiff bases derived from 2,4-dihydroxybenzaldehyde. The biological activities of the newly synthesized compounds were examined by investigating their antioxidant, antibacterial, antifungal, enzyme inhibition and DNA interaction potential. The potential of these compounds as an antioxidant was determined by 2,2-di…	Deanship of Scientific Research at King Saud University [PRG-1437-34]	The authors gratefully acknowledged Dr. Safeer Ahmed, Quaid-i-Azam University Islamabad, Pakistan, for his help in the NMR analysis and Dr. Sajid Mahmood, University of Gujrat (UOG), Gujrat, Pakistan for biological studies. The authors extend their sincere appreciations to the Deanship of Scientific Research at King Saud University for its funding this Prolific Research Group (PRG-1437-34).	Abhishek Mathur, 2011, Advances in Applied Science Research, V2, P260; Akhtar MS, 2016, J CHEM SOC PAKISTAN, V38, P242; BENDARY E, 2013, ANN AGRIC SCI, V58, P173, DOI DOI 10.1016/j.aoas.2013.07.002; BENESI HA, 1949, J AM CHEM SOC, V71, P2703, DOI 10.1021/ja01176a030; Berman HM, 2000, NUCLEIC ACIDS RES, V28, P235, DOI 10.1093/nar/28.1.235; Boghaei DM, 2008, SPECTROCHIM ACTA A, V69, P624, DOI 10.10…	39	0	0	2	17	SPRINGER BIRKHAUSER	NEW YORK	233 SPRING STREET, 6TH FLOOR, NEW YORK, NY 10013 USA	1054-2523	1554-8120		MED CHEM RES	Med. Chem. Res.	DEC	2016	25	12					2860	2871		10.1007/s00044-016-1711-y
J	Yan, SJ; Chen, SA; Zhang, W; Yang, FP; Yang, Y; Zhu, QY; Zhu, HZ; Sun, XF; Jiang, ML; Su, Y; Zhang, LR; Xing, QH; Luo, XQ				Yan, Sijia; Chen, Sheng-an; Zhang, Wen; Yang, Fanping; Yang, Ying; Zhu, Qinyuan; Zhu, Huizhong; Sun, Xinfen; Jiang, Menglin; Su, Yu; Zhang, Lirong; Xing, Qinghe; Luo, Xiaoqun			HLA-A*02 alleles are associated with tetanus antitoxin-induced exanthematous drug eruptions in Chinese patients	PHARMACOGENETICS AND GENOMICS			English	Article						cutaneous adverse drug reactions; human leukocyte antigen; pharmacogenetics; tetanus antitoxin	CUTANEOUS ADVERSE-REACTIONS; TOXIC EPIDERMAL NECROLYSIS; STEVENS-JOHNSON-SYNDROME; HLA CLASS-I; MAJOR HISTOCOMPATIBILITY COMPLEX; PEPTIDE BINDING; SYSTEMIC SYMPTOMS; JAPANESE PATIENTS; HYPERSENSITIVITY; MOLECULES	Objective Tetanus antitoxin (TAT) is an effective antitetanus medicine, but may sometimes cause adverse drug reactions such as rapid-onset anaphylactic shock and late-onset cutaneous adverse drug reactions, including exanthematous drug eruptions (EDE). Human leukocyte antigen (HLA) class I alleles are strongly associated with different types of cutaneous adverse drug reactions. This study aimed t…	National Natural Science Foundation of China [11179012, 81472873, 81071287, 30971582, 31371274]; 973 Projects [2011CB710801]; Shanghai Municipal Commission of Science and Technology Program [14DJ1400100]; Scientific and Technological Research in Open Collaborative Projects of Henan Province [152106000044]	This work was supported by the National Natural Science Foundation of China (grants 11179012, 81472873, 81071287, 30971582, and 31371274), the 973 Projects (2011CB710801), the Shanghai Municipal Commission of Science and Technology Program(14DJ1400100) and Scientific and Technological Research in Open Collaborative Projects of Henan Province (152106000044).	ARBESMAN CE, 1960, J ALLERGY, V31, P257, DOI 10.1016/0021-8707(60)90054-X; Bade-Doeding C, 2007, IMMUNOGENETICS, V59, P253, DOI 10.1007/s00251-007-0197-7; BAROUCH D, 1995, J EXP MED, V182, P1847, DOI 10.1084/jem.182.6.1847; Berman HM, 2000, NUCLEIC ACIDS RES, V28, P235, DOI 10.1093/nar/28.1.235; Bettiol J, 2002, ALLERGY, V57, P1145, DOI 10.1034/j.1398-9995.2002.23586.x; Bharadwaj M, 2012, ANNU RE…	62	1	1	0	3	LIPPINCOTT WILLIAMS & WILKINS	PHILADELPHIA	TWO COMMERCE SQ, 2001 MARKET ST, PHILADELPHIA, PA 19103 USA	1744-6872	1744-6880		PHARMACOGENET GENOM	Pharmacogenet. Genomics	DEC	2016	26	12					538	546		10.1097/FPC.0000000000000248
J	Starzyk, A; Wojciechowski, M; Cieplak, M				Starzyk, Anna; Wojciechowski, Michal; Cieplak, Marek			Structural fluctuations and thermal stability of proteins in crowded environments: effects of the excluded volume	PHYSICAL BIOLOGY			English	Article						molecular crowding; proteins; contact map; coarse-grained models; structure-based models; molecular dynamics simulations	FOLDING MECHANISMS; CONFINEMENT; THERMODYNAMICS; SIMULATIONS; DIFFUSION; SELECTION; DYNAMICS; RATES	We perform molecular dynamics simulations for a simple coarse-grained model of a protein placed inside of a softly repulsive sphere of radius R. The protein is surrounded either by a number of same molecules or a number of spherical crowding particles that immitate other biomolecules such as the osmolytes. The two descriptions are shown to lead to distinct results when testing thermal stability a…	National Science Centre [2014/15/B/ST3/01905]; EU Joint Programme in Neurodegenerative Diseases project through the National Science Centre in Poland [JPND CD FP-688-059, 2014/15/Z/NZ1/00037]	The project has been supported by the National Science Centre, Grant No. 2014/15/B/ST3/01905 and by the EU Joint Programme in Neurodegenerative Diseases project (JPND CD FP-688-059) through the National Science Centre (2014/15/Z/NZ1/00037) in Poland.	Banks DS, 2005, BIOPHYS J, V89, P2960, DOI 10.1529/biophysj.104.051078; Baumketner A, 2003, J MOL BIOL, V332, P701, DOI 10.1016/S0022-2836(03)00929-X; Berman HM, 2000, NUCLEIC ACIDS RES, V28, P235, DOI 10.1093/nar/28.1.235; Bolen DW, 2001, J MOL BIOL, V310, P955, DOI 10.1006/jmbi.2001.4819; Burg MB, 2008, J BIOL CHEM, V283, P7309, DOI 10.1074/jbc.R700042200; Cheung MS, 2005, P NATL ACAD SCI USA, …	37	1	1	3	9	IOP PUBLISHING LTD	BRISTOL	TEMPLE CIRCUS, TEMPLE WAY, BRISTOL BS1 6BE, ENGLAND	1478-3967	1478-3975		PHYS BIOL	Phys. Biol.	DEC	2016	13	6							66002	10.1088/1478-3975/13/6/066002
J	Farid, DM; Al-Mamun, MA; Manderick, B; Nowe, A				Farid, Dewan Md; Al-Mamun, Mohammad Abdullah; Manderick, Bernard; Nowe, Ann			An adaptive rule-based classifier for mining big biological data	EXPERT SYSTEMS WITH APPLICATIONS			English	Article						Brugada syndrome; Classification; Decision tree; Genomic data; Rule-based classifier	FEATURE-SELECTION; DECISION TREE; BIOINFORMATICS; PERFORMANCE; CHALLENGES; PREDICTION	In this paper, we introduce a new adaptive rule-based classifier for multi-class classification of biological data, where several problems of classifying biological data are addressed: overfitting, noisy instances and class-imbalance data. It is well known that rules are interesting way for representing data in a human interpretable way. The proposed rule-based classifier combines the random subs…	BRiDGEIris (BRussels big Data platform for sharing and discovery in clinical GEnomics) project; INNOVIRIS (Brussels Institute for Research and Innovation); FWO [G004414N]	We appreciate the support for this research received from the BRiDGEIris (BRussels big Data platform for sharing and discovery in clinical GEnomics) project that is being hosted by IB<SUP>2</SUP> (Interuniversity Institute of Bioinformatics in Brussels) and funded by INNOVIRIS (Brussels Institute for Research and Innovation). Also, FWO research project G004414N "Machine Learning for Data Mining A…	Al-Jarrah OY, 2015, BIG DATA RES, V2, P87, DOI 10.1016/j.bdr.2015.04.001; Al-Mamun MA, 2016, J THEOR BIOL, V388, P37, DOI 10.1016/j.jtbi.2015.10.007; Alter MD, 2011, PLOS ONE, V6, DOI 10.1371/journal.pone.0016715; Apte C, 1997, FUTURE GENER COMP SY, V13, P197, DOI 10.1016/S0167-739X(97)00021-6; Artimo P, 2012, NUCLEIC ACIDS RES, V40, pW597, DOI 10.1093/nar/gks400; Assuncao MD, 2015, J PARALLEL DI…	46	2	2	3	113	PERGAMON-ELSEVIER SCIENCE LTD	OXFORD	THE BOULEVARD, LANGFORD LANE, KIDLINGTON, OXFORD OX5 1GB, ENGLAND	0957-4174	1873-6793		EXPERT SYST APPL	Expert Syst. Appl.	2018-12-01	2016	64						305	316		10.1016/j.eswa.2016.08.008
J	Gomez-Gutierrez, P; Campos, PM; Vega, M; Perez, JJ				Gomez-Gutierrez, Patricia; Campos, Pedro M.; Vega, Miguel; Perez, Juan J.			Identification of a Novel Inhibitory Allosteric Site in p38 alpha	PLoS One			English	Article							CRYSTAL-STRUCTURE; PROTEIN-KINASES; COMPLEX; SELECTIVITY; SUBSTRATE; DISEASE	In the present study, we report the discovery of a novel allosteric inhibitory site for p38 alpha, a subclass of the mitogen-activated protein kinases (MAPK) family. The putative site was discovered after inspection of the crystallographic structure of the p38 alpha-MK2 complex. MK2 (MAPK-activated protein kinase 2) is an interesting protein playing a dual role as modulator and substrate of p38 a…			Bender A, 2009, J CHEM INF MODEL, V49, P108, DOI 10.1021/ci800249s; Berman HM, 2000, NUCLEIC ACIDS RES, V28, P235, DOI 10.1093/nar/28.1.235; Cargnello M, 2011, MICROBIOL MOL BIOL R, V75, P50, DOI 10.1128/MMBR.00031-10; Case D. A., 2012, AMBER 12; [Anonymous], MOE MOL OP ENV VERS; Cohen P, 2001, EUR J BIOCHEM, V268, P5001, DOI 10.1046/j.0014-2956.2001.02473.x; Cuadrado A, 2010, BIOCHEM J, V429, P4…	30	0	0	0	6	PUBLIC LIBRARY SCIENCE	SAN FRANCISCO	1160 BATTERY STREET, STE 100, SAN FRANCISCO, CA 94111 USA	1932-6203			PLOS ONE	PLoS One	2018-11-29	2016	11	11							e0167379	10.1371/journal.pone.0167379
J	Silva, D; Olsen, KW; Bednarz, MN; Droste, A; Lenkeit, CP; Chaharbakhshi, E; Temple-Wood, ER; Jemc, JC				Silva, Diane; Olsen, Kenneth W.; Bednarz, Magdalena N.; Droste, Andrew; Lenkeit, Christopher P.; Chaharbakhshi, Edwin; Temple-Wood, Emily R.; Jemc, Jennifer C.			Regulation of Gonad Morphogenesis in Drosophila melanogaster by BTB Family Transcription Factors	PLoS One			English	Article							ZINC-FINGER PROTEINS; AXON GUIDANCE GENE; POZ-DOMAIN; BALANCER CHROMOSOMES; MOLECULAR-DYNAMICS; CELL-MIGRATION; SALIVARY-GLAND; LOLA ENCODES; EXPRESSION; RIBBON	During embryogenesis, primordial germ cells (PGCs) and somatic gonadal precursor cells (SGPs) migrate and coalesce to form the early gonad. A failure of the PGCs and SGPs to form a gonad with the proper architecture not only affects germ cell development, but can also lead to infertility. Therefore, it is critical to identify the molecular mechanisms that function within both the PGCs and SGPs to…	Loyola University Chicago	DS KWO MNB AD CPL EC ERTW and JCJ were recipients of funding from Loyola University Chicago to support this research. The funders has no role in study design, data collection and analysis, decision to publish, or preparation of the manuscript.	Ahmad KF, 1998, P NATL ACAD SCI USA, V95, P12123, DOI 10.1073/pnas.95.21.12123; Altschul SF, 1997, NUCLEIC ACIDS RES, V25, P3389, DOI 10.1093/nar/25.17.3389; Arnold K, 2006, BIOINFORMATICS, V22, P195, DOI 10.1093/bioinformatics/bti770; BARDWELL VJ, 1994, GENE DEV, V8, P1664, DOI 10.1101/gad.8.14.1664; Bartoletti M, 2012, PLOS ONE, V7, DOI 10.1371/journal.pone.0049958; Bass BP, 2007, DEV BIOL, V30…	67	0	0	1	2	PUBLIC LIBRARY SCIENCE	SAN FRANCISCO	1160 BATTERY STREET, STE 100, SAN FRANCISCO, CA 94111 USA	1932-6203			PLOS ONE	PLoS One	2018-11-29	2016	11	11							e0167283	10.1371/journal.pone.0167283
J	Das Gupta, D; Kaushik, R; Jayaram, B				Das Gupta, Debarati; Kaushik, Rahul; Jayaram, B.			Protein folding is a convergent problem!	BIOCHEMICAL AND BIOPHYSICAL RESEARCH COMMUNICATIONS			English	Article						Protein folding; Higher order Ramachandran maps; Allowed regions; Configurational volume; Tripeptide unit	TERTIARY STRUCTURES; STRUCTURE PREDICTION; PATHWAYS; WATER; RECOGNITION; BHAGEERATH; LEVINTHAL; SOLVATION; SEQUENCE; PARADOX	Protein folding, tagged as a grand challenge/NP hard problem, has been an open area of research in diverse fields. Exploring folding from the configurational volume perspective in terms of phi (phi), psi(psi) backbone dihedral angles, we asked ourselves a fundamental question as to when do the neighborhood effects on the allowed phi, psi values of each residue take over to assure convergence of p…	Department of Science & Technology, Govt. of India; Department of Biotechnology, Govt. of India	Support from the Department of Science & Technology, Govt. of India and Department of Biotechnology, Govt. of India to the Supercomputing Facility for Bioinformatics & Computational Biology (SCFBio), IIT Delhi, is gratefully acknowledged.	ANFINSEN CB, 1973, SCIENCE, V181, P223, DOI 10.1126/science.181.4096.223; Anishetty Sharmila, 2002, BMC Struct Biol, V2, P9, DOI 10.1186/1472-6807-2-9; Baker D, 2000, NATURE, V405, P39, DOI 10.1038/35011000; Baldwin RL, 1999, TRENDS BIOCHEM SCI, V24, P26, DOI 10.1016/S0968-0004(98)01346-2; Berman HM, 2000, NUCLEIC ACIDS RES, V28, P235, DOI 10.1093/nar/28.1.235; Bonneau R, 2001, PROTEINS, P119; BR…	35	0	0	4	4	ACADEMIC PRESS INC ELSEVIER SCIENCE	SAN DIEGO	525 B ST, STE 1900, SAN DIEGO, CA 92101-4495 USA	0006-291X	1090-2104		BIOCHEM BIOPH RES CO	Biochem. Biophys. Res. Commun.	2018-11-25	2016	480	4					741	744		10.1016/j.bbrc.2016.10.119
J	Granchi, C; Rizzolio, F; Palazzolo, S; Carmignani, S; Macchia, M; Saccomanni, G; Manera, C; Martinelli, A; Minutolo, F; Tuccinardi, T				Granchi, Carlotta; Rizzolio, Flavio; Palazzolo, Stefano; Carmignani, Sara; Macchia, Marco; Saccomanni, Giuseppe; Manera, Clementina; Martinelli, Adriano; Minutolo, Filippo; Tuccinardi, Tiziano			Structural Optimization of 4-Chlorobenzoylpiperidine Derivatives for the Development of Potent, Reversible, and Selective Monoacylglycerol Lipase (MAGL) Inhibitors	JOURNAL OF MEDICINAL CHEMISTRY			English	Article							ENDOCANNABINOID SYSTEM; ASSAY INTERFERENCE; BLOCKADE; HYDROLYSIS; BREAST; PAINS	Monoacylglycerol lipase (MAGL) inhibitors are considered potential therapeutic agents for a variety of pathological conditions, including several types of cancer. Many MAGL inhibitors are reported in literature; however, most of them showed an irreversible mechanism of action, which caused important side effects. The use of reversible MAGL inhibitors has been only partially investigated so far, m…	University of Pisa under the PRA program [PRA 2016_27, PRA_2016_59]	This work was supported by the University of Pisa under the PRA program (projects PRA 2016_27 and PRA_2016_59).	Baell JB, 2010, J MED CHEM, V53, P2719, DOI 10.1021/jm901137j; Berman HM, 2000, NUCLEIC ACIDS RES, V28, P235, DOI 10.1093/nar/28.1.235; Bertrand T, 2010, J MOL BIOL, V396, P663, DOI 10.1016/j.jmb.2009.11.060; Case D. A., 2015, AMBER VERSION 14; Dahlin JL, 2016, ASSAY DRUG DEV TECHN, V14, P168, DOI 10.1089/adt.2015.674; Dahlin JL, 2015, J MED CHEM, V58, P2091, DOI 10.1021/jm5019093; Del Carlo S, 2…	38	0	0	3	12	AMER CHEMICAL SOC	WASHINGTON	1155 16TH ST, NW, WASHINGTON, DC 20036 USA	0022-2623	1520-4804		J MED CHEM	J. Med. Chem.	2018-11-24	2016	59	22					10299	10314		10.1021/acs.jmedchem.6b01459
J	Pan, PC; Sun, HY; Liu, H; Li, D; Zhou, WF; Kong, XT; Li, YY; Yu, HD; Hou, TJ				Pan, Peichen; Sun, Huiyong; Liu, Hui; Li, Dan; Zhou, Wenfang; Kong, Xiaotian; Li, Youyong; Yu, Huidong; Hou, Tingjun			In Silico Exploration for Novel Type-I Inhibitors of Tie-2/TEK: The Performance of Different Selection Strategy in Selecting Virtual Screening Candidates	SCIENTIFIC REPORTS			English	Article							ANTI-ANGIOGENIC THERAPY; PEPTIDE INTERACTION INTERFACE; FORCE-FIELD; MECHANICAL CALCULATIONS; BIOLOGICAL EVALUATION; PROTEIN FLEXIBILITY; MOLECULAR-MECHANICS; VEGF INHIBITORS; DRUG DISCOVERY; SH3 DOMAIN	The receptor tyrosine kinase Tie-2 is involved in vessel remodeling and maturation, and has been regarded as a potential target for the treatment of various solid tumors. The absence of novel, potent and selective inhibitors severely hampers the understanding of the therapeutic potential of Tie-2. In the present work, we describe the discovery of novel type-I inhibitors of Tie-2 by structure-base…	National Science Foundation of China [21575128]; National Major Basic Research Program of China [2016YFB0201700, 2016YFA0501701]; Innovation fund for Technology based Firms [14C26214402675, 2013J4400175]	This study was supported by the National Science Foundation of China (21575128), the National Major Basic Research Program of China (2016YFB0201700 and 2016YFA0501701), and the Innovation fund for Technology based Firms (14C26214402675, 2013J4400175).	[Anonymous], 2009, DISC STUD 2 5; [Anonymous], 2011, ACD ADME SUIT 5 0; Augustin HG, 2009, NAT REV MOL CELL BIO, V10, P165, DOI 10.1038/nrm2639; BAYLY CI, 1993, J PHYS CHEM-US, V97, P10269, DOI 10.1021/j100142a004; Bergers G, 2008, NAT REV CANCER, V8, P592, DOI 10.1038/nrc2442; Berman HM, 2000, NUCLEIC ACIDS RES, V28, P235, DOI 10.1093/nar/28.1.235; Biel N. M., 2014, CANC LETT IN PRESS; Brown JL,…	64	0	0	3	9	NATURE PUBLISHING GROUP	LONDON	MACMILLAN BUILDING, 4 CRINAN ST, LONDON N1 9XW, ENGLAND	2045-2322			SCI REP-UK	Sci Rep	2018-11-23	2016	6								37628	10.1038/srep37628
J	Captain, I; Deblonde, GJP; Rupert, PB; An, DD; Illy, MC; Rostan, E; Ralston, CY; Strong, RK; Abergel, RJ				Captain, Ilya; Deblonde, Gauthier J. -P.; Rupert, Peter B.; An, Dahlia D.; Illy, Marie-Claire; Rostan, Emeline; Ralston, Corie Y.; Strong, Roland K.; Abergel, Rebecca J.			Engineered Recognition of Tetravalent Zirconium and Thorium by Chelator Protein Systems: Toward Flexible Radiotherapy and Imaging Platforms	INORGANIC CHEMISTRY			English	Article							IMMUNE-SYSTEM; COMPLEX STABILITY; AGENTS; 3,4,3-LI(1,2-HOPO); DECORPORATION; RADIOPHARMACEUTICALS; ENTEROBACTIN; ACTINIDES; EFFICACY; THERAPY	Targeted a therapy holds tremendous potential as a cancer treatment: it offers the possibility of delivering a highly cytotoxic dose to targeted cells while minimizing damage to surrounding healthy tissue. The metallic alpha-generating radioisotopes Ac-225 and Th-227 are promising radionuclides for therapeutic use, provided adequate chelation and targeting. Here we demonstrate a new chelating pla…	U.S. Department of Energy, Office of Science, Office of Basic Energy Sciences, Chemical Sciences, Geosciences, and Biosciences Division at the Lawrence Berkeley National Laboratory [DE-AC02-05CH11231]; National Institutes of Health [R01DK073462]; U.S. Department of Energy, Office of Science Early Career Award; ParisTech chair of nuclear engineering by Areva; Office of Science, Office of Basic Ene…	This material is based upon work supported by the U.S. Department of Energy, Office of Science, Office of Basic Energy Sciences, Chemical Sciences, Geosciences, and Biosciences Division at the Lawrence Berkeley National Laboratory under Contract DE-AC02-05CH11231 (R.J.A.), and by the National Institutes of Health under award number R01DK073462 (subcontract to R.K.S.). R.J.A. is the recipient of a…	Abergel RJ, 2006, P NATL ACAD SCI USA, V103, P18499, DOI 10.1073/pnas.0607055103; Abergel RJ, 2006, J AM CHEM SOC, V128, P10998, DOI 10.1021/ja062476+; Abergel RJ, 2009, INORG CHEM, V48, P10868, DOI 10.1021/ic9013703; Aghevlian S., 2015, ADV DRUG DELIV REV, DOI [10.1016/j.addr.2015.12.003, DOI 10.1016/J.ADDR.2015.12.003]; Allred BE, 2015, P NATL ACAD SCI USA, V112, P10342, DOI 10.1073/pnas.150890…	33	2	2	9	14	AMER CHEMICAL SOC	WASHINGTON	1155 16TH ST, NW, WASHINGTON, DC 20036 USA	0020-1669	1520-510X		INORG CHEM	Inorg. Chem.	2018-11-21	2016	55	22					11930	11936		10.1021/acs.inorgchem.6b02041
J	Peled, S; Leiderman, O; Charar, R; Efroni, G; Shav-Tal, Y; Ofran, Y				Peled, Sapir; Leiderman, Olga; Charar, Rotem; Efroni, Gilat; Shav-Tal, Yaron; Ofran, Yanay			De-novo protein function prediction using DNA binding and RNA binding proteins as a test case	NATURE COMMUNICATIONS			English	Article							GROWTH-FACTOR FAMILY; ONE-HYBRID SYSTEM; MOONLIGHTING PROTEINS; TRANSCRIPTION FACTORS; CHIP-SEQ; SEQUENCE; CLASSIFICATION; IDENTIFICATION; PROFILES; SOFTWARE	Of the currently identified protein sequences, 99.6% have never been observed in the laboratory as proteins and their molecular function has not been established experimentally. Predicting the function of such proteins relies mostly on annotated homologs. However, this has resulted in some erroneous annotations, and many proteins have no annotated homologs. Here we propose a de-novo function pred…			Ahmad S, 2004, BIOINFORMATICS, V20, P477, DOI 10.1093/bioinformatics/btg432; ALTSCHUL SF, 1990, J MOL BIOL, V215, P403, DOI 10.1006/jmbi.1990.9999; Ashburner M, 2000, NAT GENET, V25, P25; Ashkenazi S, 2012, BIOINFORMATICS, V28, P3203, DOI 10.1093/bioinformatics/bts608; Attwood TK, 2012, DATABASE-OXFORD, DOI 10.1093/database/bas019; Bailey TL, 2009, NUCLEIC ACIDS RES, V37, pW202, DOI 10.1093/nar/g…	48	0	0	3	12	NATURE PUBLISHING GROUP	LONDON	MACMILLAN BUILDING, 4 CRINAN ST, LONDON N1 9XW, ENGLAND	2041-1723			NAT COMMUN	Nat. Commun.	2018-11-21	2016	7								13424	10.1038/ncomms13424
J	Romao, CV; Vicente, JB; Borges, PT; Victor, BL; Lamosa, P; Silva, E; Pereira, L; Bandeiras, TM; Soares, CM; Carrondo, MA; Turner, D; Teixeira, M; Frazao, C				Romao, Celia V.; Vicente, Joao B.; Borges, Patricia T.; Victor, Bruno L.; Lamosa, Pedro; Silva, Elisio; Pereira, Luis; Bandeiras, Tiago M.; Soares, Claudio M.; Carrondo, Maria A.; Turner, David; Teixeira, Miguel; Frazao, Carlos			Structure of Escherichia coli Flavodiiron Nitric Oxide Reductase	JOURNAL OF MOLECULAR BIOLOGY			English	Article						flavorubredoxin; flavodiiron protein; NorV; diiron center; nitric oxide	PARASITE GIARDIA-INTESTINALIS; SITE-DIRECTED MUTAGENESIS; DESULFOVIBRIO-GIGAS; ELECTRON-TRANSFER; CLOSTRIDIUM-PASTEURIANUM; STRUCTURE REFINEMENT; NITROSATIVE STRESS; PROTEIN-STRUCTURE; MOORELLA-THERMOACETICA; DIELECTRIC-PROPERTIES	Flavodiiron proteins (FDPs) are present in organisms from all domains of life and have been described so far to be involved in the detoxification of oxygen or nitric oxide (NO), acting as O-2 and/or NO reductases. The Escherichia coli FDP, named flavorubredoxin (FIRd), is the most extensively studied FDP. Biochemical and in vivo studies revealed that FIRd is involved in NO detoxification as part …	Portuguese Fundacao para a Ciencia e Tecnologia (FCT) [PTDC/BBB-BQB/3135/2014]; FCT [SFRH/BPD/94050/2013, SFRH/BD/85106/2012]; MOSTMICRO Research Unit - FCT [LISBOA-01-0145-FEDER-007660]; iNOVA4Health Research Unit - FCT [LISBOA-01-0145-FEDER-007344]; FEDER	This work was financed by the Portuguese Fundacao para a Ciencia e Tecnologia (FCT) through grant PTDC/BBB-BQB/3135/2014 (M.T.). C.V.R. and P.T.B. acknowledge the FCT grants SFRH/BPD/94050/2013 and SFRH/BD/85106/2012. J.B.V. is an FCT Investigator (IF/01004/2014). This work was further financially supported by MOSTMICRO (LISBOA-01-0145-FEDER-007660), by iNOVA4Health (LISBOA-01-0145-FEDER-007344) …	ADAMS MWW, 1992, ADV INORG CHEM RAD, V38, P341; Adams PD, 2010, ACTA CRYSTALLOGR D, V66, P213, DOI 10.1107/S0907444909052925; Afonine PV, 2012, ACTA CRYSTALLOGR D, V68, P352, DOI 10.1107/S0907444912001308; Auchere F, 2004, J BIOL INORG CHEM, V9, P839, DOI 10.1007/s00775-004-0584-6; Ayhan M, 1996, INORG CHEM, V35, P5902, DOI 10.1021/ic951653x; Baker NA, 2001, P NATL ACAD SCI USA, V98, P10037, DOI …	110	1	1	11	19	ACADEMIC PRESS LTD- ELSEVIER SCIENCE LTD	LONDON	24-28 OVAL RD, LONDON NW1 7DX, ENGLAND	0022-2836	1089-8638		J MOL BIOL	J. Mol. Biol.	2018-11-20	2016	428	23					4686	4707		10.1016/j.jmb.2016.10.008
J	Tse, A; Verkhivker, GM				Tse, Amanda; Verkhivker, Gennady M.			Exploring Molecular Mechanisms of Paradoxical Activation in the BRAF Kinase Dimers: Atomistic Simulations of Conformational Dynamics and Modeling of Allosteric Communication Networks and Signaling Pathways	PLOS ONE			English	Article							B-RAF KINASE; PROTEIN-TYROSINE KINASES; GROWTH-FACTOR RECEPTOR; RESIDUE INTERACTION NETWORKS; FREE-ENERGY CALCULATIONS; ONCOGENIC MUTATIONS; EGF RECEPTOR; FORCE-FIELD; NEGATIVE COOPERATIVITY; DELETION MUTATIONS	The recent studies have revealed that most BRAF inhibitors can paradoxically induce kinase activation by promoting dimerization and enzyme transactivation. Despite rapidly growing number of structural and functional studies about the BRAF dimer complexes, the molecular basis of paradoxical activation phenomenon is poorly understood and remains largely hypothetical. In this work, we have explored …			Aguilar D, 2012, PLOS ONE, V7, DOI 10.1371/journal.pone.0041430; Amitai G, 2004, J MOL BIOL, V344, P1135, DOI 10.1016/j.jmb.2004.10.055; Anandakrishnan R, 2012, NUCLEIC ACIDS RES, V40, pW537, DOI 10.1093/nar/gks375; Arora R, 2015, J MED CHEM, V58, P1818, DOI 10.1021/jm501667n; Artim SC, 2012, BIOCHEM J, V448, P213, DOI 10.1042/BJ20121365; Atilgan AR, 2004, BIOPHYS J, V86, P85, DOI 10.1016/S0006-3…	150	1	1	2	3	PUBLIC LIBRARY SCIENCE	SAN FRANCISCO	1160 BATTERY STREET, STE 100, SAN FRANCISCO, CA 94111 USA	1932-6203			PLOS ONE	PLoS One	2018-11-18	2016	11	11							e0166583	10.1371/journal.pone.0166583
J	Orlando, G; Raimondi, D; Vranken, WF				Orlando, G.; Raimondi, D.; Vranken, W. F.			Observation selection bias in contact prediction and its implications for structural bioinformatics	SCIENTIFIC REPORTS			English	Article							PROTEIN SECONDARY STRUCTURE; DIRECT-COUPLING ANALYSIS; EVOLUTIONARY INFORMATION; COMPUTATIONAL PREDICTION; FOLDING PROBLEM; SEQUENCE; DISORDER; NETWORKS	Next Generation Sequencing is dramatically increasing the number of known protein sequences, with related experimentally determined protein structures lagging behind. Structural bioinformatics is attempting to close this gap by developing approaches that predict structure-level characteristics for uncharacterized protein sequences, with most of the developed methods relying heavily on evolutionar…			Altschul SF, 1997, NUCLEIC ACIDS RES, V25, P3389, DOI 10.1093/nar/25.17.3389; ANFINSEN CB, 1973, SCIENCE, V181, P223, DOI 10.1126/science.181.4096.223; Bateman A, 2015, NUCLEIC ACIDS RES, V43, pD204, DOI 10.1093/nar/gku989; Berman HM, 2000, NUCLEIC ACIDS RES, V28, P235, DOI 10.1093/nar/28.1.235; Casbon JA, 2004, BMC BIOINFORMATICS, V5, DOI 10.1186/1471-2105-5-200; Chandonia JM, 2006, SCIENCE, V31…	47	1	1	0	3	NATURE PUBLISHING GROUP	LONDON	MACMILLAN BUILDING, 4 CRINAN ST, LONDON N1 9XW, ENGLAND	2045-2322			SCI REP-UK	Sci Rep	2018-11-18	2016	6								36679	10.1038/srep36679
J	Hafner, AK; Beilstein, K; Graab, P; Ball, AK; Saul, MJ; Hofmann, B; Steinhilber, D				Haefner, Ann-Kathrin; Beilstein, Kim; Graab, Philipp; Ball, Ann-Katrin; Saul, Meike J.; Hofmann, Bettina; Steinhilber, Dieter			Identification and Characterization of a New Protein Isoform of Human 5-Lipoxygenase	PLOS ONE			English	Article							ARACHIDONIC-ACID; ACTIVATING PROTEIN; HUMAN-LYMPHOCYTES; ENZYME-ACTIVITY; C2-LIKE DOMAIN; MESSENGER-RNA; T-LYMPHOCYTES; B-LYMPHOCYTES; CELL-LINE; EXPRESSION	Leukotrienes (LTs) are inflammatory mediators that play a pivotal role in many diseases like asthma bronchiale, atherosclerosis and in various types of cancer. The key enzyme for generation of LTs is the 5-lipoxygenase (5-LO). Here, we present a novel putative protein isoform of human 5-LO that lacks exon 4, termed 5-LO Delta 4, identified in cells of lymphoid origin, namely the Burkitt lymphoma …	Deutsche Forschungsgemeinschaft Else Kroner Fresenius-Stiftung [SFB 1039, 2013_A265]	Deutsche Forschungsgemeinschaft (SFB 1039) Else Kroner Fresenius-Stiftung (2013_A265). The funders had no role in study design, data collection and analysis, decision to publish, or preparation of the manuscript.	ABRAHAM RT, 1986, J IMMUNOPHARMACOL, V8, P165; Allain EP, 2015, PLOS ONE, V10, DOI 10.1371/journal.pone.0132607; AMBRUS JL, 1988, J IMMUNOL, V140, P2382; Berman HM, 2000, NUCLEIC ACIDS RES, V28, P235, DOI 10.1093/nar/28.1.235; Boudreau LH, 2011, FASEB J, V25, P1097, DOI 10.1096/fj.10-173856; Busch S, 2015, J IMMUNOL, V194, P1646, DOI 10.4049/jimmunol.1402163; CHEN CA, 1988, BIOTECHNIQUES, V6, P63…	48	3	3	2	7	PUBLIC LIBRARY SCIENCE	SAN FRANCISCO	1160 BATTERY STREET, STE 100, SAN FRANCISCO, CA 94111 USA	1932-6203			PLOS ONE	PLoS One	2018-11-17	2016	11	11							e0166591	10.1371/journal.pone.0166591
J	Guivernau, B; Bonet, J; Valls-Comamala, V; Bosch-Morato, M; Godoy, JA; Inestrosa, NC; Peralvarez-Marin, A; Fernandez-Busquets, X; Andreu, D; Oliva, B; Munoz, FJ				Guivernau, Biuse; Bonet, Jaume; Valls-Comamala, Victoria; Bosch-Morato, Monica; Godoy, Juan A.; Inestrosa, Nibaldo C.; Peralvarez-Marin, Alex; Fernandez-Busquets, Xavier; Andreu, David; Oliva, Baldomero; Munoz, Francisco J.			Amyloid-beta Peptide Nitrotyrosination Stabilizes Oligomers and Enhances NMDAR-Mediated Toxicity	JOURNAL OF NEUROSCIENCE			English	Article						Alzheimer; amyloid; nitrotyrosination; NMDA Rc; oligomers; peroxynitrite	IMPAIR SYNAPTIC PLASTICITY; ALZHEIMERS-DISEASE; NITRIC-OXIDE; OXIDATIVE STRESS; PRECURSOR PROTEIN; PROTEOMIC IDENTIFICATION; ENDOPLASMIC-RETICULUM; SECONDARY STRUCTURE; SOLUBLE OLIGOMERS; IMAGE-ANALYSIS	Alzheimer's disease (AD) is a neurodegenerative disorder characterized by the pathological aggregation of the amyloid-beta peptide (A beta). Monomeric soluble A beta can switch from helicoidal to beta-sheet conformation, promoting its assembly into oligomers and subsequently to amyloid fibrils. Oligomers are highly toxic to neurons and have been reported to induce synaptic transmission impairment…	Spanish Plan Estatal de I + D + I; ISCIII-Subdireccion General de Evaluacion y Fomento de la Investigacion [PI13/00408, Red HERACLES RD12/0042/0014]; FEDER Funds; panish Ministerio de Economia y Competitividad [BIO2014-57518-R, BIO2014-52872-R, AGL2014-52395-C2-2-R]; Generalitat de Catalunya (Spain) [2014-SGR-938]; Chilean Funds for Science [CONICYT-PFB 12/2007]; FONDECYT [1160724]; Universitat A…	This work was supported by Spanish Plan Estatal de I + D + I 2013-2016 and the ISCIII-Subdireccion General de Evaluacion y Fomento de la Investigacion Grants PI13/00408 and Red HERACLES RD12/0042/0014 and FEDER Funds, Spanish Ministerio de Economia y Competitividad BIO2014-57518-R, BIO2014-52872-R, and AGL2014-52395-C2-2-R and FEDER Funds, the Generalitat de Catalunya (Spain) 2014-SGR-938, and Ch…	Arimon M, 2005, FASEB J, V19, P1344, DOI 10.1096/fj.04-3137fje; Beckman JS, 1996, AM J PHYSIOL-CELL PH, V271, pC1424; Berman HM, 2000, NUCLEIC ACIDS RES, V28, P235, DOI 10.1093/nar/28.1.235; Berridge MJ, 2010, PFLUG ARCH EUR J PHY, V459, P441, DOI 10.1007/s00424-009-0736-1; Bitan Gal, 2005, Methods Mol Biol, V299, P3; Bolte S, 2006, J MICROSC-OXFORD, V224, P213, DOI 10.1111/j.1365-2818.2006.01706…	59	5	5	5	12	SOC NEUROSCIENCE	WASHINGTON	11 DUPONT CIRCLE, NW, STE 500, WASHINGTON, DC 20036 USA	0270-6474			J NEUROSCI	J. Neurosci.	2018-11-16	2016	36	46					11693	11703		10.1523/JNEUROSCI.1081-16.2016
J	Skjaerven, L; Jariwala, S; Yao, XQ; Grant, BJ				Skjaerven, Lars; Jariwala, Shashank; Yao, Xin-Qiu; Grant, Barry J.			Online interactive analysis of protein structure ensembles with Bio3D-web	BIOINFORMATICS			English	Article							WEB SERVER; FLEXIBILITY	Bio3D-web is an online application for analyzing the sequence, structure and conformational heterogeneity of protein families. Major functionality is provided for identifying protein structure sets for analysis, their alignment and refined structure superposition, sequence and structure conservation analysis, mapping and clustering of conformations and the quantitative comparison of their predict…	University of Michigan; National Institutes of Health [GM070862]; University of Bergen	This work was supported by the University of Michigan, National Institutes of Health (GM070862 to BG) and the University of Bergen.	Bakan A, 2011, BIOINFORMATICS, V27, P1575, DOI 10.1093/bioinformatics/btr168; Berman HM, 2000, NUCLEIC ACIDS RES, V28, P235, DOI 10.1093/nar/28.1.235; Eyal E, 2015, BIOINFORMATICS, V31, P1487, DOI 10.1093/bioinformatics/btu847; Finn RD, 2014, NUCLEIC ACIDS RES, V42, pD222, DOI 10.1093/nar/gkt1223; Grant BJ, 2006, BIOINFORMATICS, V22, P2695, DOI 10.1093/bioinformatics/btl461; Hrabe T, 2016, NUCLEI…	12	2	2	4	4	OXFORD UNIV PRESS	OXFORD	GREAT CLARENDON ST, OXFORD OX2 6DP, ENGLAND	1367-4803	1460-2059		BIOINFORMATICS	Bioinformatics	2018-11-15	2016	32	22					3510	3512		10.1093/bioinformatics/btw482
J	Gundersen, GW; Jagodnik, KM; Woodland, H; Fernandez, NF; Sani, K; Dohlman, AB; Ung, PMU; Monteiro, CD; Schlessinger, A; Ma'ayan, A				Gundersen, Gregory W.; Jagodnik, Kathleen M.; Woodland, Holly; Fernandez, Nicholas F.; Sani, Kevin; Dohlman, Anders B.; Ung, Peter Man-Un; Monteiro, Caroline D.; Schlessinger, Avner; Ma'ayan, Avi			GEN3VA: aggregation and analysis of gene expression signatures from related studies	BMC BIOINFORMATICS			English	Article						Systems Biology; Microarrays; Data mining; Interactive reports	NF-KAPPA-B; GLUCOCORTICOID-RECEPTOR; OMNIBUS; TOOL; ACTIVATION; REPOSITORY; ONTOLOGY; ENRICHR; BIOLOGY; UPDATE	Background: Genome-wide gene expression profiling of mammalian cells is becoming a staple of many published biomedical and biological research studies. Such data is deposited into data repositories such as the Gene Expression Omnibus (GEO) for potential reuse. However, these repositories currently do not provide simple interfaces to systematically analyze collections of related studies. Results: …	National Institutes of Health (NIH) grants [U54HL127624, U54CA189201, R01GM098316]	This work is partially supported by the National Institutes of Health (NIH) grants U54HL127624, U54CA189201, and R01GM098316 to AM.	Altonsy MO, 2014, J BIOL CHEM, V289, P8231, DOI 10.1074/jbc.M113.545178; Ashburner M, 2000, NAT GENET, V25, P25; Barrett T, 2013, NUCLEIC ACIDS RES, V41, pD991, DOI 10.1093/nar/gks1193; Berger SI, 2007, BMC BIOINFORMATICS, V8, DOI 10.1186/1471-2105-8-372; Berman HM, 2000, NUCLEIC ACIDS RES, V28, P235, DOI 10.1093/nar/28.1.235; Bernstein BE, 2010, NAT BIOTECHNOL, V28, P1045, DOI 10.1038/nbt1010-10…	38	2	2	0	0	BIOMED CENTRAL LTD	LONDON	236 GRAYS INN RD, FLOOR 6, LONDON WC1X 8HL, ENGLAND	1471-2105			BMC BIOINFORMATICS	BMC Bioinformatics	2018-11-15	2016	17								461	10.1186/s12859-016-1321-1
J	Miao, ZC; Cao, Y				Miao, Zhichao; Cao, Yang			Quantifying side-chain conformational variations in protein structure	SCIENTIFIC REPORTS			English	Article							STRUCTURE PREDICTION; ROTAMER LIBRARY; RNA-PUZZLES; BACKBONE; PACKING; MODELS; ENVIRONMENT; PROGRAMS; SYSTEM; CASP	Protein side-chain conformation is closely related to their biological functions. The side-chain prediction is a key step in protein design, protein docking and structure optimization. However, side-chain polymorphism comprehensively exists in protein as various types and has been long overlooked by side-chain prediction. But such conformational variations have not been quantitatively studied and…	French Government [ANR-10-BINF-02-02]; National Natural Science Foundation of China [31401130]	We gratefully thank Mr. Luigi D'Ascenzo, Dr. Filip Leonarski and Prof. Pascal Auffinger for helpful discussion. We thank Prof. Roland Dunbrack and Prof. Yang Zhang, Dr. Jianyi Yang for insightful discussion of rotamer library and B factor. Z.M. is supported by the French Government grant ANR-10-BINF-02-02 "BACNET". Y.C. is supported by the National Natural Science Foundation of China (#31401130 t…	Adams PD, 2010, ACTA CRYSTALLOGR D, V66, P213, DOI 10.1107/S0907444909052925; Altschul SF, 1997, NUCLEIC ACIDS RES, V25, P3389, DOI 10.1093/nar/25.17.3389; ALTSCHUL SF, 1990, J MOL BIOL, V215, P403, DOI 10.1006/jmbi.1990.9999; Argyriou AI, 2015, BIOMOL NMR ASSIGN, V9, P219, DOI 10.1007/s12104-014-9578-7; Bai XC, 2015, TRENDS BIOCHEM SCI, V40, P49, DOI 10.1016/j.tibs.2014.10.005; Barad BA, 2015, N…	36	1	1	1	3	NATURE PUBLISHING GROUP	LONDON	MACMILLAN BUILDING, 4 CRINAN ST, LONDON N1 9XW, ENGLAND	2045-2322			SCI REP-UK	Sci Rep	2018-11-15	2016	6								37024	10.1038/srep37024
J	Moise, IM; Bicu, E; Dubois, J; Farce, A; Rigo, B; Ghinet, A				Moise, Iuliana-Monica; Bicu, Elena; Dubois, Joelle; Farce, Amaury; Rigo, Benoit; Ghinet, Alina			Methylene versus carbonyl bridge in the structure of new tubulin polymerization inhibitors with tricyclic A-rings	BIOORGANIC & MEDICINAL CHEMISTRY			English	Article						Tubulin inhibitor; Phenothiazine; Azaphenothiazine; Phenoxazine; Iminodibenzyl; 9(10H)Acridone; Antitumor agent	ANTINEOPLASTIC AGENTS; ANTIMITOTIC AGENTS; COLCHICINE; DISCOVERY; COMBRETASTATIN-A-4; PHENOTHIAZINES; CYTOTOXICITY; MICROTUBULES; DERIVATIVES; PHOSPHATE	The phenothiazine group has been identified as a suitable A ring in the structure of tubulin polymerization inhibitors. In our search to identify more potent inhibitors, a study of different isosteric tricyclic groups as new potential A rings was first realized and permitted to identify 1-azaphenothiazine and iminodibenzyl as favorable modulations providing compounds with improved activity agains…	Ministerul Educatiei, Cercetarii, Tineretului si Sportului (Romania)	We are grateful for financial support from the "Ministerul Educatiei, Cercetarii, Tineretului si Sportului" (Romania) for the I.-M. M.'s scholarship, and the NCI (National Cancer Institute) for the biological evaluation of compounds on their 60-cell panel and for the access to NCI Compare; the testing was performed by the Developmental Therapeutics Program, Division of Cancer Treatment and Diagno…	Abuhaie CM, 2013, BIOORG MED CHEM LETT, V23, P147, DOI 10.1016/j.bmcl.2012.10.135; Barron DM, 2003, ANAL BIOCHEM, V315, P49, DOI 10.1016/S0003-2697(02)00691-7; Berger G, 2014, BIOORGAN MED CHEM, V22, P3527, DOI 10.1016/j.bmc.2014.04.017; Berman HM, 2000, NUCLEIC ACIDS RES, V28, P235, DOI 10.1093/nar/28.1.235; Boyd R. B., 1997, ANTICANCER DRUG DEV, P23; Dohle W, 2014, CHEMMEDCHEM, V9, P1783, DOI 1…	41	2	2	5	11	PERGAMON-ELSEVIER SCIENCE LTD	OXFORD	THE BOULEVARD, LANGFORD LANE, KIDLINGTON, OXFORD OX5 1GB, ENGLAND	0968-0896	1464-3391		BIOORGAN MED CHEM	Bioorg. Med. Chem.	2018-11-15	2016	24	22					6021	6030		10.1016/j.bmc.2016.09.063
J	Jha, S; Kanaujia, SP; Limaye, AM				Jha, Shalinee; Kanaujia, Shankar Prasad; Limaye, Anil M.			Direct inhibition of matrix metalloproteinase-2 (MMP-2) by (-)-epigallocatechin-3-gallate: A possible role for the fibronectin type II repeats	GENE			English	Article						Epigallocatechin-3-gallate; Fibronectin type II repeat; Green tea polyphenol; Matrix metalloproteinase-2; Molecular docking	COLLAGEN-BINDING DOMAIN; GREEN TEA POLYPHENOL; BREAST-CANCER; SUBSTRATE-BINDING; INVASION; CELLS; MODULATION; EPIGALLOCATECHIN-3-GALLATE; GELATINASES; EXPRESSION	Matrix metalloproteinases (MMPs)-2 and -9, also called gelatinases, constitute a distinct subgroup within the MMP family of extracellular matrix remodeling proteases. Gelatinases are implicated in tumor cell invasion and metastasis, and are attractive therapeutic targets. Several synthetic small molecule inhibitors of MMPs developed till date have failed in clinical trials. This has prompted expl…	Department of Science and Technology, Govt. of India [SR/FT/LS-028/2009]; Indian Council of Medical Research, Govt. of India [5/7/773/12-RCH]; IIT Guwahati	AML acknowledges research funding from the Department of Science and Technology, Govt. of India (Letter No. SR/FT/LS-028/2009) and the Indian Council of Medical Research, Govt. of India (Letter No. 5/7/773/12-RCH). SPK acknowledges the financial support from IIT Guwahati in form of the start-up grant.	Annabi B, 2002, BBA-MOL CELL RES, V1542, P209, DOI 10.1016/S0167-4889(01)00187-2; Berman HM, 2000, NUCLEIC ACIDS RES, V28, P235, DOI 10.1093/nar/28.1.235; Bhattacharya D, 2013, PROTEINS, V81, P119, DOI 10.1002/prot.24167; Chabottaux V, 2007, CLIN EXP METASTAS, V24, P647, DOI 10.1007/s10585-007-9113-7; Comeau SR, 2004, NUCLEIC ACIDS RES, V32, pW96, DOI 10.1093/nar/gkh354; Demeule M, 2000, BBA-PROT…	35	1	1	1	8	ELSEVIER SCIENCE BV	AMSTERDAM	PO BOX 211, 1000 AE AMSTERDAM, NETHERLANDS	0378-1119	1879-0038		GENE	Gene	2018-11-15	2016	593	1					126	130		10.1016/j.gene.2016.07.061
J	Koehl, P				Koehl, Patrice			Minimum action transition paths connecting minima on an energy surface	JOURNAL OF CHEMICAL PHYSICS			English	Article							PROTEIN CONFORMATIONAL TRANSITIONS; MOLECULAR-DYNAMICS SIMULATIONS; ELASTIC NETWORK MODELS; LOCAL-STRUCTURE MODEL; UNFOLDING TRANSITION; GLOBULAR-PROTEINS; SINGLE-PARAMETER; STATE STRUCTURE; SADDLE-POINTS; STRING METHOD	Dynamics is essential to the biological functions of many bio-molecules, yet our knowledge of dynamics remains fragmented. Experimental techniques for studying bio-molecules either provide high resolution information on static conformations of the molecule or provide low-resolution, ensemble information that does not shed light on single molecule dynamics. In parallel, bio-molecular dynamics occu…	Ministry of Education from Singapore [MOE2012-T3-1-008]	We thank Marc Delarue and Frederic Poitevin for continuous and constructive discussions on this research. We also thank Marc Delarue for carefully reading and commenting on the manuscript. We acknowledge support from the Ministry of Education from Singapore through Grant No. MOE2012-T3-1-008.	ABE H, 1981, BIOPOLYMERS, V20, P1013, DOI 10.1002/bip.1981.360200512; Anderson E., 1990, CS90105 U TENN; Bahar I, 1997, FOLD DES, V2, P173, DOI 10.1016/S1359-0278(97)00024-2; Barrett R., 1993, TEMPLATES SOLUTION L; Berman HM, 2000, NUCLEIC ACIDS RES, V28, P235, DOI 10.1093/nar/28.1.235; Best RB, 2005, STRUCTURE, V13, P1755, DOI 10.1016/j.str.2005.08.009; Bolhuis PG, 2002, ANNU REV PHYS CHEM, V53,…	104	3	3	4	6	AMER INST PHYSICS	MELVILLE	1305 WALT WHITMAN RD, STE 300, MELVILLE, NY 11747-4501 USA	0021-9606	1089-7690		J CHEM PHYS	J. Chem. Phys.	2018-11-14	2016	145	18							184111	10.1063/1.4966974
J	Luo, ZP				Luo, Zhipu			Selenourea: a convenient phasing vehicle for macromolecular X-ray crystal structures	SCIENTIFIC REPORTS			English	Article							ANOMALOUS DIFFRACTION; CRYSTALLOGRAPHY; PROTEINS; SIGNAL; DNA; DERIVATIZATION; SULFUR; MAD	Majority of novel X-ray crystal structures of proteins are currently solved using the anomalous diffraction signal provided by selenium after incorporation of selenomethionine instead of natural methionine by genetic engineering methods. However, selenium can be inserted into protein crystals in the form of selenourea (SeC(NH2)(2)), by adding the crystalline powder of selenourea into mother liquo…	Intramural Research Program of the National Cancer Institute	This work was supported by the Intramural Research Program of the National Cancer Institute. The help of Zbigniew Dauter in preparation of this manuscript is gratefully appreciated. The instruction for CFP expression and purification and growth of HPP crystals by Milosz Ruszkowski are appreciated. Provision of thaumatin and trypsin crystals by Miroslawa Dauter is gratefully acknowledged.	Adams PD, 2010, ACTA CRYSTALLOGR D, V66, P213, DOI 10.1107/S0907444909052925; Berman HM, 2000, NUCLEIC ACIDS RES, V28, P235, DOI 10.1093/nar/28.1.235; Blake C. C. F., 2001, INT TABLES CRYSTALLO, VF, P745; Blundell T., 1976, PROTEIN CRYSTALLOGRA, P183; Dauter Z, 2005, CR CHIM, V8, P1808, DOI 10.1016/j.crci.2005.02.032; Dauter Z, 1999, J MOL BIOL, V289, P83, DOI 10.1006/jmbi.1999.2743; Dauter Z, 20…	29	2	2	1	5	NATURE PUBLISHING GROUP	LONDON	MACMILLAN BUILDING, 4 CRINAN ST, LONDON N1 9XW, ENGLAND	2045-2322			SCI REP-UK	Sci Rep	2018-11-14	2016	6								37123	10.1038/srep37123
J	Nobrega, FL; Ferreira, D; Martins, IM; Suarez-Diez, M; Azeredo, J; Kluskens, LD; Rodrigues, LR				Nobrega, Franklin L.; Ferreira, Debora; Martins, Ivone M.; Suarez-Diez, Maria; Azeredo, Joana; Kluskens, Leon D.; Rodrigues, Ligia R.			Screening and characterization of novel specific peptides targeting MDA-MB-231 claudin-low breast carcinoma by computer-aided phage display methodologies	BMC CANCER			English	Article						Claudin-low breast cancer; Phage display; MDA-MB-231; PRWAVSP; DTFNSFGRVRIE	STRUCTURE PREDICTION; CANCER; SELECTION; IDENTIFICATION; VALIDATION; DYNAMICS; PATTERNS; LIGANDS; DOCKING; LIBRARY	Background: Claudin-low breast carcinoma represents 19% of all breast cancer cases and is characterized by an aggressive progression with metastatic nature and high rates of relapse. Due to a lack of known specific molecular biomarkers for this breast cancer subtype, there are no targeted therapies available, which results in the worst prognosis of all breast cancer subtypes. Hence, the identific…	Portuguese Foundation for Science and Technology (FCT); European Community fund FEDER, through Program COMPETE [FCOMP-01-0124-FEDER-021053 (PTDC/SAU-BMA/121028/2010), RECI/BBB-EBI/0179/2012 (FCOMP-01-0124-FEDER-027462), UID/BIO/04469/2013, NORTE-07-0124-FEDER-000027, NORTE-07-0124-FEDER-000028]; Programa Operacional Regional do Norte (ON.2 - O Novo Norte), QREN, FEDER; FCT [SFRH/BD/86462/2012]	This study was supported by the Portuguese Foundation for Science and Technology (FCT) and the European Community fund FEDER, through Program COMPETE, under the scope of the Projects FCOMP-01-0124-FEDER-021053 (PTDC/SAU-BMA/121028/2010), RECI/BBB-EBI/0179/2012 (FCOMP-01-0124-FEDER-027462), the strategic funding of UID/BIO/04469/2013 unit, and the Projects "BioHealth - Biotechnology and Bioenginee…	Abbineni G, 2010, MOL PHARMACEUT, V7, P1629, DOI 10.1021/mp100052y; Annecke K, 2008, ADV CLIN CHEM, V45, P31, DOI 10.1016/S0065-2423(07)00002-9; Bar H, 2008, BMC BIOTECHNOL, V8, DOI 10.1186/1472-6750-8-37; Berman HM, 2000, NUCLEIC ACIDS RES, V28, P235, DOI 10.1093/nar/28.1.235; Bertos NR, 2011, J CLIN INVEST, V121, P3789, DOI 10.1172/JCI57100; Bigelow RLH, 2009, BREAST CANCER RES TR, V117, P31, D…	46	0	0	0	5	BIOMED CENTRAL LTD	LONDON	236 GRAYS INN RD, FLOOR 6, LONDON WC1X 8HL, ENGLAND	1471-2407			BMC CANCER	BMC Cancer	2018-11-14	2016	16								881	10.1186/s12885-016-2937-2
J	Zhou, W; Wang, JN; Wu, ZY; Huang, C; Lu, AP; Wang, YH				Zhou, Wei; Wang, Jinan; Wu, Ziyin; Huang, Chao; Lu, Aiping; Wang, Yonghua			Systems pharmacology exploration of botanic drug pairs reveals the mechanism for treating different diseases	SCIENTIFIC REPORTS			English	Article							SALVIANOLIC-ACID-B; TRADITIONAL CHINESE MEDICINE; TUMOR-NECROSIS-FACTOR; IN-VITRO; CARDIOVASCULAR-DISEASE; MOLECULAR-MECHANICS; CYPERUS-ROTUNDUS; HERBAL MEDICINES; NEUROPATHIC PAIN; HEART-FAILURE	Multi-herb therapy has been widely used in Traditional Chinese medicine and tailored to meet the specific needs of each individual. However, the potential molecular or systems mechanisms of them to treat various diseases have not been fully elucidated. To address this question, a systems pharmacology approach, integrating pharmacokinetics, pharmacology and systems biology, is used to comprehensiv…	Fund of Northwest A F University; National Natural Science Foundation of China [31170796, 81373892]	The research is supported by the Fund of Northwest A & F University and is financially supported by the National Natural Science Foundation of China (Grant No. 31170796 and 81373892).	Aamand R, 2009, AM J PHYSIOL-HEART C, V297, pH2068, DOI 10.1152/ajpheart.00525.2009; Adam F, 2008, J THROMB HAEMOST, V6, P2007, DOI 10.1111/j.1538-7836.2008.03169.x; Adams J. D., 2006, CHIN MED, V1; Akerlund M, 1979, ACTA OBSTET GYN SCAN, V58, P27; Altman RB, 2007, NAT GENET, V39, P426, DOI 10.1038/ng0407-426; BERENBAUM MC, 1981, ADV CANCER RES, V35, P269, DOI 10.1016/S0065-230X(08)60912-4; Berma…	118	2	2	10	28	NATURE PUBLISHING GROUP	LONDON	MACMILLAN BUILDING, 4 CRINAN ST, LONDON N1 9XW, ENGLAND	2045-2322			SCI REP-UK	Sci Rep	2018-11-14	2016	6								36985	10.1038/srep36985
J	Pucci, F; Rooman, M				Pucci, Fabrizio; Rooman, Marianne			Improved insights into protein thermal stability: from the molecular to the structurome scale	PHILOSOPHICAL TRANSACTIONS OF THE ROYAL SOCIETY A-MATHEMATICAL PHYSICAL AND ENGINEERING SCIENCES			English	Article						amino acid interactions; statistical potentials; stability prediction; protein mutations; evolutionary pressure	STATISTICAL POTENTIALS; THERMOPHILIC ADAPTATION; ANION-PI; EVOLUTION; ELUCIDATION	Despite the intense efforts of the last decades to understand the thermal stability of proteins, the mechanisms responsible for its modulation still remain debated. In this investigation, we tackle this issue by showing how a multiscale perspective can yield new insights. With the help of temperature-dependent statistical potentials, we analysed some amino acid interactions at the molecular level…	FNRS through an FRFC grant	F.P. is Postdoctoral Researcher and M.R. Research Director at the Belgian Fund for Scientific Research (FNRS). Financial support from the FNRS through an FRFC grant is acknowledged.	Ashenberg O, 2013, P NATL ACAD SCI USA, V110, P21071, DOI 10.1073/pnas.1314781111; Berezovsky IN, 2005, P NATL ACAD SCI USA, V102, P12742, DOI 10.1073/pnas.0503890102; Berman HM, 2000, NUCLEIC ACIDS RES, V28, P235, DOI 10.1093/nar/28.1.235; Chakravarty S, 2000, FEBS LETT, V470, P65, DOI 10.1016/S0014-5793(00)01267-9; Chakravarty S, 2002, BIOCHEMISTRY-US, V41, P8152, DOI 10.1021/bi025523t; Chakrav…	37	2	2	4	9	ROYAL SOC	LONDON	6-9 CARLTON HOUSE TERRACE, LONDON SW1Y 5AG, ENGLAND	1364-503X	1471-2962		PHILOS T R SOC A	Philos. Trans. R. Soc. A-Math. Phys. Eng. Sci.	2018-11-13	2016	374	2080							20160141	10.1098/rsta.2016.0141
J	Sanllehi, P; Abad, JL; Bujons, J; Casas, J; Delgado, A				Sanllehi, Pol; Abad, Jose-Luis; Bujons, Jordi; Casas, Josefina; Delgado, Antonio			Studies on the inhibition of sphingosine-1-phosphate lyase by stabilized reaction intermediates and stereodefined azido phosphates	EUROPEAN JOURNAL OF MEDICINAL CHEMISTRY			English	Article						Sphingolipids; Enzyme inhibitor; Sphingosine lyase; Synthesis; Stereocontrolled	SPHINGOSINE 1-PHOSPHATE LYASE; D-ERYTHRO-SPHINGOSINE; THREO-SPHINGOSINE; SPHINGOLIPID METABOLISM; CERAMIDE 1-PHOSPHATE; ACCURATE DOCKING; RECEPTORS; PROTEIN; GLIDE; DIAZOTRANSFER	Two kinds of inhibitors of the PLP-dependent enzyme sphingosine-1-phosphate lyase have been designed and tested on the bacterial (StS1PL) and the human (hS1PL) enzymes. Amino phosphates 1, 12, and 32, mimicking the intermediate aldimines of the catalytic process, were weak inhibitors on both enzyme sources. On the other hand, a series of stereodefined azido phosphates, resulting from the replacem…	Ministerio de Ciencia e Innovacion, Spain [CTQ2014-54743-R]; Fundacio la Marato de TV3 [20112130, 20112132]	We are grateful to Prof. Andreas Billich (Novartis) for a generous gift of recombinant hS1PL. Partial financial support from the "Ministerio de Ciencia e Innovacion", Spain (Project CTQ2014-54743-R is acknowledged). The authors also want to thank "Fundacio la Marato de TV3" for financial support through Projects 20112130 and 20112132.	Adada M, 2013, FEBS J, V280, P6354, DOI 10.1111/febs.12446; Arana L, 2010, LIPIDS HEALTH DIS, V9, DOI 10.1186/1476-511X-9-15; Argiriadi M.A., 2016, BIOORG MED CHEM LETT; Bagdanoff JT, 2010, J MED CHEM, V53, P8650, DOI 10.1021/jm101183p; Bagdanoff JT, 2009, J MED CHEM, V52, P3941, DOI 10.1021/jm900278w; Bandhuvula P, 2005, J BIOL CHEM, V280, P33697, DOI 10.1074/jbc.C500294200; Bedia C, 2009, CHEMB…	65	0	0	0	4	ELSEVIER FRANCE-EDITIONS SCIENTIFIQUES MEDICALES ELSEVIER	PARIS	23 RUE LINOIS, 75724 PARIS, FRANCE	0223-5234	1768-3254		EUR J MED CHEM	Eur. J. Med. Chem.	2018-11-10	2016	123						905	915		10.1016/j.ejmech.2016.08.008
J	Coucke, A; Uguzzoni, G; Oteri, F; Cocco, S; Monasson, R; Weigt, M				Coucke, Alice; Uguzzoni, Guido; Oteri, Francesco; Cocco, Simona; Monasson, Remi; Weigt, Martin			Direct coevolutionary couplings reflect biophysical residue interactions in proteins	JOURNAL OF CHEMICAL PHYSICS			English	Article							QUASI-CHEMICAL APPROXIMATION; STATISTICAL-MECHANICS; CONTACT PREDICTION; INFORMATION-THEORY; PAIR POTENTIALS; SEQUENCE; FAMILIES; SIMILARITY; DERIVATION; ENSEMBLES	Coevolution of residues in contact imposes strong statistical constraints on the sequence variability between homologous proteins. Direct-Coupling Analysis (DCA), a global statistical inference method, successfully models this variability across homologous protein families to infer structural information about proteins. For each residue pair, DCA infers 21 x 21 matrices describing the coevolution…	Institut des Systemes Complexes (ISC-PIF); Region Ile-de-France; [ANR-13-BS04-0012-01]	We are grateful to H. Jacquin for useful discussions regarding LP and to E. Westhof and R. Guerois for discussions concerning the structural interpretation of the results. S.C., R.M., and M.W. are partially funded by Grant No. ANR-13-BS04-0012-01 (Coevstat). A.C. thanks the Institut des Systemes Complexes (ISC-PIF) and the Region Ile-de-France for financial support.	Balakrishnan S, 2011, PROTEINS, V79, P1061, DOI 10.1002/prot.22934; Barton JP, 2016, BIOINFORMATICS, V32, P3089, DOI 10.1093/bioinformatics/btw328; Barton JP, 2014, PHYS REV E, V90, DOI 10.1103/PhysRevE.90.012132; Berman HM, 2000, NUCLEIC ACIDS RES, V28, P235, DOI 10.1093/nar/28.1.235; Cocco S, 2011, PHYS REV LETT, V106, DOI 10.1103/PhysRevLett.106.090601; Cocco S, 2013, PLOS COMPUT BIOL, V9, DOI…	36	0	0	2	5	AMER INST PHYSICS	MELVILLE	1305 WALT WHITMAN RD, STE 300, MELVILLE, NY 11747-4501 USA	0021-9606	1089-7690		J CHEM PHYS	J. Chem. Phys.	2018-11-07	2016	145	17							174102	10.1063/1.4966156
J	Leenaraj, DR; Manimaran, D; Joe, IH				Leenaraj, D. R.; Manimaran, D.; Joe, I. Hubert			Molecular docking and structural analysis of non-opioid analgesic drug acemetacin with halogen substitution: A DFT approach	JOURNAL OF MOLECULAR STRUCTURE			English	Article						DFT; NBO; NHO; NPA; Hyperconjugation; Molecular docking	VIBRATIONAL-SPECTRA; BROMOBENZENE DERIVATIVES; FT-RAMAN; DENSITY; ACID; CHLOROBENZENE; ASSIGNMENT; IR	Acemetacin is a non-opioid analgesic which belongs to the class, the non-steroidal anti-inflammatory drug. The bioactive conformer was identified through potential energy surface scan studies. Spectral features of acemetacin have been probed by the techniques of Fourier transform infrared, Raman and Nuclear magnetic resonance combined with density functional theory calculations at the B3LYP level…			Al Weiss, 1990, PROGR PHYS ORGANIC C; Arjunan V, 2006, SPECTROCHIM ACTA A, V64, P233, DOI 10.1016/j.saa.2005.05.045; Auer ME, 2003, J MOL STRUCT, V661, P307, DOI 10.1016/j.molstruc.2003.09.002; Bayari S, 2005, J MOL STRUC-THEOCHEM, V726, P225, DOI 10.1016/j.theochem.2005.02.078; BECKE AD, 1993, J CHEM PHYS, V98, P5648, DOI 10.1063/1.464913; BECKE AD, 1988, PHYS REV A, V38, P3098, DOI 10.1103/Phys…	50	2	2	1	31	ELSEVIER SCIENCE BV	AMSTERDAM	PO BOX 211, 1000 AE AMSTERDAM, NETHERLANDS	0022-2860	1872-8014		J MOL STRUCT	J. Mol. Struct.	2018-11-05	2016	1123						180	190		10.1016/j.molstruc.2016.06.035
J	Kim, S; Bolton, EE; Bryant, SH				Kim, Sunghwan; Bolton, Evan E.; Bryant, Stephen H.			Similar compounds versus similar conformers: complementarity between PubChem 2-D and 3-D neighboring sets	JOURNAL OF CHEMINFORMATICS			English	Article						PubChem; PubChem3D; Molecular similarity; Neighboring; Neighbor Preference Index (NPI)	MOLECULAR DESCRIPTOR SPACE; GAUSSIAN DESCRIPTION; SHAPE; 2D; COEFFICIENTS; INFORMATION; DIVERSITY; RESOURCE; DATABASE	Background: PubChem is a public repository for biological activities of small molecules. For the efficient use of its vast amount of chemical information, PubChem performs 2-dimensional (2-D) and 3-dimensional (3-D) neighborings, which precompute "neighbor" relationships between molecules in the PubChem Compound database, using the PubChem subgraph fingerprints-based 2-D similarity and the Gaussi…	Intramural Research Program of the National Library of Medicine, National Institutes of Health, U.S. Department of Health and Human Services	We are grateful to the NCBI Systems staff, especially Ron Patterson, Charlie Cook, and Don Preuss, whose efforts helped make the PubChem3D project possible. We also thank Cindy Clark, NIH Library Editing Service, for reviewing the manuscript. This research was supported by the Intramural Research Program of the National Library of Medicine, National Institutes of Health, U.S. Department of Health…	Acland A, 2013, NUCLEIC ACIDS RES, V41, pD8, DOI 10.1093/nar/gks1189; Bender A, 2009, J CHEM INF MODEL, V49, P108, DOI 10.1021/ci800249s; Berman HM, 2000, NUCLEIC ACIDS RES, V28, P235, DOI 10.1093/nar/28.1.235; Bolton EE, 2011, J CHEMINFORMATICS, V3, DOI 10.1186/1758-2946-3-32; Bolton EE, 2011, J CHEMINFORMATICS, V3, DOI 10.1186/1758-2946-3-13; Bolton EE, 2011, J CHEMINFORMATICS, V3, DOI 10.1186/…	35	0	0	4	7	BIOMED CENTRAL LTD	LONDON	236 GRAYS INN RD, FLOOR 6, LONDON WC1X 8HL, ENGLAND	1758-2946			J CHEMINFORMATICS	J. Cheminformatics	2018-11-04	2016	8								62	10.1186/s13321-016-0163-1
J	Sima, M; Novotny, M; Pravda, L; Sumova, P; Rohousova, I; Volf, P				Sima, Michal; Novotny, Marian; Pravda, Lukas; Sumova, Petra; Rohousova, Iva; Volf, Petr			The Diversity of Yellow-Related Proteins in Sand Flies (Diptera: Psychodidae)	PLOS ONE			English	Article							FLY LUTZOMYIA-LONGIPALPIS; LEISHMANIA-BRAZILIENSIS INFECTION; SALIVARY-GLAND TRANSCRIPTOMES; VISCERAL LEISHMANIASIS; ANTIBODY-RESPONSE; CUTANEOUS LEISHMANIASIS; PHLEBOTOMINE SANDFLIES; ENDEMIC AREAS; IDENTIFICATION; VECTOR	Yellow-related proteins (YRPs) present in sand fly saliva act as affinity binders of bioamines, and help the fly to complete a bloodmeal by scavenging the physiological signals of damaged cells. They are also the main antigens in sand fly saliva and their recombinant form is used as a marker of host exposure to sand flies. Moreover, several salivary proteins and plasmids coding these proteins ind…	Charles University (GAUK) [120516/B-BIO]; UNCE [204013]; Ministry of Education, Youth and Sports of the Czech Republic under the project CEITEC [LQ1601]; Czech Science Foundation [P506 13-05292S]	This work was supported by Charles University (GAUK project no. 120516/B-BIO, http://www.cuni.cz/UKEN-1.html, PS; UNCE 204013, http://www.cuni.cz/UKEN-1.html, MS). LP was supported by Ministry of Education, Youth and Sports of the Czech Republic under the project CEITEC 2020 (LQ1601) (http://www.msmt.cz/?lang=2, LP) Czech Science Foundation (Project Number: P506 13-05292S, https://gacr.cz/en/, to…	Abascal F, 2005, BIOINFORMATICS, V21, P2104, DOI 10.1093/bioinformatics/bti263; Abdeladhim M, 2014, INFECT GENET EVOL, V28, P691, DOI 10.1016/j.meegid.2014.07.028; Abdeladhim M, 2012, PLOS ONE, V7, DOI 10.1371/journal.pone.0047347; Abrudan J, 2013, INSECT MOL BIOL, V22, P211, DOI 10.1111/imb.12015; Adeladhim M, 2016, PLOS NEGLECT TROP D, V10, DOI [10.1371/journal.pntd.0004771, DOI 10.1371/JOURNAL…	59	1	1	6	10	PUBLIC LIBRARY SCIENCE	SAN FRANCISCO	1160 BATTERY STREET, STE 100, SAN FRANCISCO, CA 94111 USA	1932-6203			PLOS ONE	PLoS One	2018-11-03	2016	11	11							e0166191	10.1371/journal.pone.0166191
J	Luo, H; Zhang, P; Cao, XH; Du, DZ; Ye, H; Huang, H; Li, C; Qin, SY; Wan, CL; Shi, LM; He, L; Yang, L				Luo, Heng; Zhang, Ping; Cao, Xi Hang; Du, Dizheng; Ye, Hao; Huang, Hui; Li, Can; Qin, Shengying; Wan, Chunling; Shi, Leming; He, Lin; Yang, Lun			DPDR-CPI, a server that predicts Drug Positioning and Drug Repositioning via Chemical-Protein Interactome	SCIENTIFIC REPORTS			English	Article							PERSONALIZED MEDICINE; WEB SERVER; ROSIGLITAZONE; DISEASE; DISCOVERY; RESPONSES; RESOURCE; UPDATE; CELLS	The cost of developing a new drug has increased sharply over the past years. To ensure a reasonable return-on-investment, it is useful for drug discovery researchers in both industry and academia to identify all the possible indications for early pipeline molecules. For the first time, we propose the term computational "drug candidate positioning" or "drug positioning", to describe the above proc…			Ashburn TT, 2004, NAT REV DRUG DISCOV, V3, P673, DOI 10.1038/nrd1468; Avorn J, 2015, NEW ENGL J MED, V372, P1877, DOI 10.1056/NEJMp1500848; Barratt M. J., 2012, DRUG REPOSITIONING B, V66; Benton CR, 2008, J PHYSIOL-LONDON, V586, P1755, DOI 10.1113/jphysiol.2007.146563; Berman HM, 2000, NUCLEIC ACIDS RES, V28, P235, DOI 10.1093/nar/28.1.235; Bienfait B, 2013, J CHEMINFORMATICS, V5, DOI 10.1186/175…	56	0	0	8	11	NATURE PUBLISHING GROUP	LONDON	MACMILLAN BUILDING, 4 CRINAN ST, LONDON N1 9XW, ENGLAND	2045-2322			SCI REP-UK	Sci Rep	2018-11-02	2016	6								35996	10.1038/srep35996
J	Malathi, K; Anbarasu, A; Ramaiah, S				Malathi, K.; Anbarasu, Anand; Ramaiah, Sudha			Ethyl Iso-allocholate from a Medicinal Rice Karungkavuni Inhibits Dihydropteroate Synthase in Escherichia coli: A Molecular Docking and Dynamics Study	INDIAN JOURNAL OF PHARMACEUTICAL SCIENCES			English	Article						Dihydropteroate synthase; drug resistance; sulfonamide; binding affinity; folate biosynthesis; molecular docking; molecular simulation	CRYSTAL-STRUCTURE; DRUG DISCOVERY; SULFONAMIDE; MECHANISM; EXTRACTS; DESIGN	Medicinal rice varieties have defensive and therapeutic properties against many human disorders. Drug resistance has become a major problem in recent years. Escherichia coli have developed resistance to most of the antibiotics including sulfonamides that target dihydropteroate synthase. In the present study, we attempted to identify a novel inhibitor for the dihydropteroate synthase from a medici…	Indian Council of Medical Research (ICMR), Government of India Agency [2014-0099]	RS and AA gratefully acknowledge the Indian Council of Medical Research (ICMR), Government of India Agency for the research Grant (IRIS ID: 2014-0099). The authors would like to thank Mr. Krishnanunni and R. G. Swetha for their help in the initial part of our study. The authors would also like to thank the management of VIT University for providing the necessary facilities to carry out this resea…	Achari A, 1997, NAT STRUCT BIOL, V4, P490, DOI 10.1038/nsb0697-490; Adil Gani, 2012, Journal of Food Processing and Technology, V3, P146; Babaoglu K, 2004, STRUCTURE, V12, P1705, DOI 10.1016/j.star.2004.07.011; Berman HM, 2000, NUCLEIC ACIDS RES, V28, P235, DOI 10.1093/nar/28.1.235; Esa N. M., 2013, J RICE RES, V1, P107, DOI DOI 10.4172/JRR.1000107; Fernandez ML, 2005, CARDIOVASC DRUG REV, V23, P…	34	0	0	0	0	MEDKNOW PUBLICATIONS & MEDIA PVT LTD	MUMBAI	B-9, KANARA BUSINESS CENTRE, OFF LINK RD, GHAKTOPAR-E, MUMBAI, 400075, INDIA	0250-474X	1998-3743		INDIAN J PHARM SCI	Indian J. Pharm. Sci.	NOV-DEC	2016	78	6					780	788		10.4172/pharmaceutical-sciences.1000184
J	Rahaman, J; Siltberg-Liberles, J				Rahaman, Jordon; Siltberg-Liberles, Jessica			Avoiding Regions Symptomatic of Conformational and Functional Flexibility to Identify Antiviral Targets in Current and Future Coronaviruses	GENOME BIOLOGY AND EVOLUTION			English	Article						structural disorder; evolutionary dynamics; Coronavirus; evolution; divergence; MERS-CoV	RESPIRATORY SYNDROME CORONAVIRUS; STRUCTURE PREDICTION SERVER; MERS-COV; EVOLUTIONARY DYNAMICS; STRUCTURAL DISORDER; PROTEIN SEQUENCES; ENERGY CONTENT; MIDDLE-EAST; INFERENCE; REARRANGEMENT	Within the last 15 years, two related coronaviruses (Severe Acute Respiratory Syndrome [SARS]-CoV and Middle East Respiratory Syndrome [MERS]-CoV) expanded their host range to include humans, with increased virulence in their new host. Coronaviruses were recently found to have little intrinsic disorder compared with many other virus families. Because intrinsically disordered regions have been pro…			Anderson LJ, 2010, INT J ANTIMICROB AG, V36, pS21, DOI 10.1016/j.ijantimicag.2010.06.016; Berman HM, 2000, NUCLEIC ACIDS RES, V28, P235, DOI 10.1093/nar/28.1.235; Bermingham A, 2012, EUROSURVEILLANCE, V17, P6; Bornholdt ZA, 2013, CELL, V154, P763, DOI 10.1016/j.cell.2013.07.015; Bryson K, 2005, NUCLEIC ACIDS RES, V33, pW36, DOI 10.1093/nar/gki410; Campen A, 2008, PROTEIN PEPTIDE LETT, V15, P956, …	53	0	0	3	5	OXFORD UNIV PRESS	OXFORD	GREAT CLARENDON ST, OXFORD OX2 6DP, ENGLAND	1759-6653			GENOME BIOL EVOL	Genome Biol. Evol.	NOV	2016	8	11					3471	3484		10.1093/gbe/evw246
J	Etheve, L; Martin, J; Lavery, R				Etheve, Loic; Martin, Juliette; Lavery, Richard			Protein-DNA interfaces: a molecular dynamics analysis of time-dependent recognition processes for three transcription factors	NUCLEIC ACIDS RESEARCH			English	Article							NUCLEIC-ACIDS; ION-PAIRS; INDIRECT READOUT; UCSF CHIMERA; SIDE-CHAINS; FORCE-FIELD; SEQUENCE; COMPLEX; BINDING; AMBER	We have studied the dynamics of three transcription factor-DNA complexes using all-atom, microsecond-scale MD simulations. In each case, the salt bridges and hydrogen bond interactions formed at the protein-DNA interface are found to be dynamic, with lifetimes typically in the range of tens to hundreds of picoseconds, although some interactions, notably those involving specific binding to DNA bas…	ANR project CHROME [ANR-12-BSV5-0017-01]; Rhone-Alpes ARC 1 Sante Doctoral Grant	ANR project CHROME [ANR-12-BSV5-0017-01]; Rhone-Alpes ARC 1 Sante Doctoral Grant (to L.E.). Funding for open access charge: ANR project CHROME [ANR-12-BSV5-0017-01].	Anderson KM, 2015, J BIOMOL NMR, V62, P1, DOI 10.1007/s10858-015-9909-8; Anderson KM, 2013, J AM CHEM SOC, V135, P3613, DOI 10.1021/ja312314b; Badis G, 2009, SCIENCE, V324, P1720, DOI 10.1126/science.1162327; BERENDSEN HJC, 1987, J PHYS CHEM-US, V91, P6269, DOI 10.1021/j100308a038; BERENDSEN HJC, 1984, J CHEM PHYS, V81, P3684, DOI 10.1063/1.448118; Berman HM, 2000, NUCLEIC ACIDS RES, V28, P235, D…	43	1	1	6	8	OXFORD UNIV PRESS	OXFORD	GREAT CLARENDON ST, OXFORD OX2 6DP, ENGLAND	0305-1048	1362-4962		NUCLEIC ACIDS RES	Nucleic Acids Res.	NOV	2016	44	20					9990	10002		10.1093/nar/gkw841
J	Vandermarliere, E; Stes, E; Gevaert, K; Martens, L				Vandermarliere, Elien; Stes, Elisabeth; Gevaert, Kris; Martens, Lennart			RESOLUTION OF PROTEIN STRUCTURE BY MASS SPECTROMETRY	MASS SPECTROMETRY REVIEWS			English	Review						conformational proteomics; mass spcetrometry; protein dynamics; protein structures	CHEMICAL CROSS-LINKING; COLLAGEN-BINDING DOMAIN; CIRCULAR-DICHROISM SPECTROSCOPY; LIMITED PROTEOLYSIS; LINKED PEPTIDES; CONFORMATIONAL-CHANGES; ELECTRON-MICROSCOPY; MACROMOLECULAR ASSEMBLIES; CLOSTRIDIUM-HISTOLYTICUM; GLUTATHIONE TRANSFERASE	Typically, mass spectrometry is used to identify the peptides present in a complex peptide mixture and subsequently the precursor proteins. As such, mass spectrometry focuses mainly on the primary structure, the (modified) amino acid sequence of peptides and proteins. In contrast, the three-dimensional structure of a protein is typically determined with protein X-ray crystallography or NMR. Despi…	Belgian government agency for Innovation by Science and Technolog [IWT 110431]; Scientific Research (FWO)-Flanders	Contract grant sponsor: Belgian government agency for Innovation by Science and Technolog; Contract grant number: IWT 110431; Contract grant sponsor: Scientific Research (FWO)-Flanders.	Apweiler R, 2014, NUCLEIC ACIDS RES, V42, pD191, DOI 10.1093/nar/gkt1140; Armstrong RN, 1997, CHEM RES TOXICOL, V10, P2, DOI 10.1021/tx960072x; Back JW, 2003, J MOL BIOL, V331, P303, DOI 10.1016/S0022-2836(03)00721-6; Badalamente MA, 2000, J HAND SURG-AM, V25A, P629, DOI 10.1053/jhsu.2000.6918; Balakrishnan G, 2008, CURR OPIN STRUC BIOL, V18, P623, DOI 10.1016/j.sbi.2008.06.001; Baumeister W, 200…	122	3	3	4	12	WILEY-BLACKWELL	HOBOKEN	111 RIVER ST, HOBOKEN 07030-5774, NJ USA	0277-7037	1098-2787		MASS SPECTROM REV	Mass Spectrom. Rev.	NOV-DEC	2016	35	6					653	665		10.1002/mas.21450
J	Pfau, T; Pacheco, MP; Sauter, T				Pfau, Thomas; Pacheco, Maria Pires; Sauter, Thomas			Towards improved genome-scale metabolic network reconstructions: unification, transcript specificity and beyond	BRIEFINGS IN BIOINFORMATICS			English	Article						metabolic network reconstruction; gene-protein-reaction association; unification	ALTERNATIVE SPLICING DATABASE; PROTEIN FAMILIES DATABASE; SACCHAROMYCES-CEREVISIAE; ESCHERICHIA-COLI; SYSTEMS BIOLOGY; GLOBAL RECONSTRUCTION; SOFTWARE APPLICATIONS; HUMAN TISSUES; DATA-BANK; MODELS	Genome-scale metabolic network reconstructions provide a basis for the investigation of the metabolic properties of an organism. There are reconstructions available for multiple organisms, from prokaryotes to higher organisms and methods for the analysis of a reconstruction. One example is the use of flux balance analysis to improve the yields of a target chemical, which has been applied successf…	Life Science Research Unit, University of Luxembourg; Fond National de la Recherche Luxembourg [AFR 6041230]	T.S. and T.P. are funded by the Life Science Research Unit, University of Luxembourg. M.P.P. was supported by a fellowship from the Fond National de la Recherche Luxembourg (AFR 6041230).	Abelo A, 2000, DRUG METAB DISPOS, V28, P966; Agren R, 2013, PLOS COMPUT BIOL, V9, DOI 10.1371/journal.pcbi.1002980; Agren R, 2012, PLOS COMPUT BIOL, V8, DOI 10.1371/journal.pcbi.1002518; Alarcon MA, 2013, NEUROBIOL AGING, V34, DOI 10.1016/j.neurobiolaging.2012.11.004; Apweiler R, 2014, NUCLEIC ACIDS RES, V42, pD191, DOI 10.1093/nar/gkt1140; Ashburner M, 2000, NAT GENET, V25, P25; Aung Hnin W, 201…	126	2	2	0	2	OXFORD UNIV PRESS	OXFORD	GREAT CLARENDON ST, OXFORD OX2 6DP, ENGLAND	1467-5463	1477-4054		BRIEF BIOINFORM	Brief. Bioinform.	NOV	2016	17	6					1060	1069		10.1093/bib/bbv100
J	Santos, DA; Costa, MGD; Alves, CR; Caffarena, ER				Santos, Deborah Antunes; de Souza Costa, Mauricio Garcia; Alves, Carlos Roberto; Caffarena, Ernesto Raul			Structural and dynamic insights into the C-terminal extension of cysteine proteinase B from Leishmania amazonensis	JOURNAL OF MOLECULAR GRAPHICS & MODELLING			English	Article						C-Terminal extension of cysteine proteinase B; Leishmania amazonensis; Protein structure prediction; Molecular dynamics	SECONDARY STRUCTURE PREDICTION; AMINO-ACID-SEQUENCE; CONNECTIVITY PREDICTION; MOLECULAR-DYNAMICS; VIRULENCE FACTORS; BONDING STATE; FORCE-FIELD; WEB SERVER; INFECTION; SIMULATION	Cysteine proteinase B (CPB) is a significant virulence factor for Leishmania infections. Upon processing from its zymogen form, it happens a release of the immunomodulatory CPB C-terminal extension (cyspep) into the cytoplasm of the macrophage. Epitopes derived from this fragment were shown to influence the proportion of lymphocytes CD8+ upon infection, favoring the parasite escaping from the hos…	CNPq; CAPES; FAPERJ	The authors thank CNPq, CAPES, and FAPERJ for the financial support.	Alexander J, 1998, J IMMUNOL, V161, P6794; Alves CR, 2005, EXP PARASITOL, V109, P38, DOI 10.1016/j.exppara.2004.10.005; Alves CR, 2004, PARASITE IMMUNOL, V26, P127, DOI 10.1111/j.0141-9838.2004.00691.x; Alves CR, 2001, J MOL STRUC-THEOCHEM, V539, P289, DOI 10.1016/S0166-1280(00)00799-5; Alves CR, 2001, CYTOBIOS, V104, P33; Antuch W, 1996, NAT STRUCT BIOL, V3, P662, DOI 10.1038/nsb0896-662; BARRAL…	70	0	0	1	1	ELSEVIER SCIENCE INC	NEW YORK	360 PARK AVE SOUTH, NEW YORK, NY 10010-1710 USA	1093-3263	1873-4243		J MOL GRAPH MODEL	J. Mol. Graph.	NOV	2016	70						30	39		10.1016/j.jmgm.2016.08.007
J	Xu, XM; Ma, SF; Feng, ZW; Hu, GX; Wang, LR; Xie, XQ				Xu, Xiaomeng; Ma, Shifan; Feng, Zhiwei; Hu, Guanxing; Wang, Lirong; Xie, Xiang-Qun			Chemogenomics knowledgebase and systems pharmacology for hallucinogen target identification-Salvinorin A as a case study	JOURNAL OF MOLECULAR GRAPHICS & MODELLING			English	Article						Hallucinogen; Salvinorin A; Drug abuse; Chemogenomics database; Target identification; Systems pharmacology	RECEPTOR KNOCKOUT MICE; DOPAMINE D3 RECEPTOR; PROTEIN DATA-BANK; SALVIA-DIVINORUM; CANNABINOID RECEPTOR; MOLECULAR-DYNAMICS; DRUG DISCOVERY; LSD TREATMENT; LIGANDS; ANTAGONIST	Drug abuse is a serious problem worldwide. Recently, hallucinogens have been reported as a potential preventative and auxiliary therapy for substance abuse. However, the use of hallucinogens as a drug abuse treatment has potential risks, as the fundamental mechanisms of hallucinogens are not clear. So far, no scientific database is available for the mechanism research of hallucinogens. We constru…	NIH NIDA [P30DA035778]	This project was supported by NIH NIDA P30DA035778 (XQXie). We gratefully acknowledge the professional discussion provided by Dr. Rao Rapaka from NIDA, which became the stimulus for this work.	Aghajanian GK, 1999, NEUROPSYCHOPHARMACOL, V21, pS16; Ahn KH, 2009, MOL PHARMACOL, V76, P833, DOI 10.1124/mol.109.057356; Berger SI, 2011, WIRES SYST BIOL MED, V3, P129, DOI 10.1002/wsbm.114; Berman HM, 2000, NUCLEIC ACIDS RES, V28, P235, DOI 10.1093/nar/28.1.235; BERNSTEIN FC, 1977, EUR J BIOCHEM, V80, P319, DOI 10.1111/j.1432-1033.1977.tb11885.x; Boran ADW, 2010, CURR OPIN DRUG DISC, V13, P297;…	78	0	0	1	2	ELSEVIER SCIENCE INC	NEW YORK	360 PARK AVE SOUTH, NEW YORK, NY 10010-1710 USA	1093-3263	1873-4243		J MOL GRAPH MODEL	J. Mol. Graph.	NOV	2016	70						284	295		10.1016/j.jmgm.2016.08.001
J	Schwarz, S; Shen, JZ; Kadlec, K; Wang, Y; Michael, GB; Fessler, AT; Vester, B				Schwarz, Stefan; Shen, Jianzhong; Kadlec, Kristina; Wang, Yang; Michael, Geovana Brenner; Fessler, Andrea T.; Vester, Birte			Lincosamides, Streptogramins, Phenicols, and Pleuromutilins: Mode of Action and Mechanisms of Resistance	COLD SPRING HARBOR PERSPECTIVES IN MEDICINE			English	Article							MULTIRESISTANCE GENE CFR; 23S RIBOSOMAL-RNA; COAGULASE-NEGATIVE STAPHYLOCOCCI; PEPTIDYL TRANSFERASE CENTER; MEDIATED ANTIMICROBIAL RESISTANCE; VIRGINIAMYCIN-LIKE ANTIBIOTICS; BOVINE RESPIRATORY-DISEASE; PLASMIDS CARRYING CFR; MULTIDRUG EFFLUX PUMP; ABC TRANSPORTER GENE	Lincosamides, streptogramins, phenicols, and pleuromutilins (LSPPs) represent four structurally different classes of antimicrobial agents that inhibit bacterial protein synthesis by binding to particular sites on the 50S ribosomal subunit of the ribosomes. Members of all four classes are used for different purposes in human and veterinary medicine in various countries worldwide. Bacteria have dev…	German Federal Ministry of Education and Research (BMBF) through the German Aerospace Center (DLR) Grant [01KI1313D, 01KI1301D]; German Research Foundation (DFG) [SCHW382/10-1, SCHW382/10-2]; National Basic Research Program of China [2013CB127200]; National Natural Science Foundation of China [31370046]; Danish National Research Foundation [12-125943]	We thank our technical staff, Kerstin Meyer, Roswitha Becker, Vivian Hensel, Ute Beermann, Marita Meurer, and Regina Ronge for their invaluable help and support and our colleagues and cooperation partners for the fruitful collaboration in the various research projects that formed the basis of this article. Work in our laboratories is supported by the German Federal Ministry of Education and Resea…	Aarestrup FM, 2000, VET MICROBIOL, V74, P353, DOI 10.1016/S0378-1135(00)00197-8; Achard A, 2005, ANTIMICROB AGENTS CH, V49, P2716, DOI 10.1128/AAC.49.7.2716-2719.2005; AHONKHAI VI, 1982, ANTIMICROB AGENTS CH, V21, P902; Allignet J, 1999, PLASMID, V42, P134, DOI 10.1006/plas.1999.1412; Allignet J, 1996, ANTIMICROB AGENTS CH, V40, P2523; ALLIGNET J, 1993, GENE, V130, P91, DOI 10.1016/0378-1119(93)9…	205	1	1	2	4	COLD SPRING HARBOR LAB PRESS, PUBLICATIONS DEPT	COLD SPRING HARBOR	1 BUNGTOWN RD, COLD SPRING HARBOR, NY 11724 USA	2157-1422			CSH PERSPECT MED	Cold Spring Harb. Perspect. Med.	NOV	2016	6	11							a027037	10.1101/cshperspect.a027037
J	Hu, B; Kuang, ZK; Feng, SY; Wang, D; He, SB; Kong, DX				Hu, Ben; Kuang, Zheng-Kun; Feng, Shi-Yu; Wang, Dong; He, Song-Bing; Kong, De-Xin			Three-Dimensional Biologically Relevant Spectrum (BRS-3D): Shape Similarity Profile Based on PDB Ligands as Molecular Descriptors	MOLECULES			English	Article						BRS-3D; molecular similarity profile; QSAR; SVM; ligand-based virtual screening; subtype selectivity	SUPPORT VECTOR MACHINE; PROTEIN-COUPLED RECEPTORS; PREDICTING SUBTYPE SELECTIVITY; DRUG DISCOVERY; SCOP DATABASE; NEURODEGENERATIVE DISEASES; MEDICINAL CHEMISTRY; CHEMICAL SPACE; PHARMACOLOGY; INHIBITORS	The crystallized ligands in the Protein Data Bank (PDB) can be treated as the inverse shapes of the active sites of corresponding proteins. Therefore, the shape similarity between a molecule and PDB ligands indicated the possibility of the molecule to bind with the targets. In this paper, we proposed a shape similarity profile that can be used as a molecular descriptor for ligand-based virtual sc…	Fundamental Research Funds for the Central Universities [2014PY007]; Special Program for Applied Research on Super Computation of the NSFC-Guangdong Joint Fund; National Natural Science Foundation of China [21075046, 21275061]	This work was supported by Fundamental Research Funds for the Central Universities (grant 2014PY007), Special Program for Applied Research on Super Computation of the NSFC-Guangdong Joint Fund (the second phase) and the National Natural Science Foundation of China (grant 21075046 and 21275061). The funders had no role in study design, data collection and analysis, decision to publish, or preparat…	[Anonymous], 2011, PIP PIL VERS 8 5; Alexander DLJ, 2015, J CHEM INF MODEL, V55, P1316, DOI 10.1021/acs.jcim.5b00206; Andreeva A, 2004, NUCLEIC ACIDS RES, V32, pD226, DOI 10.1093/nar/gkh039; Andreeva A, 2008, NUCLEIC ACIDS RES, V36, pD419, DOI 10.1093/nar/gkm993; Andreeva A, 2014, NUCLEIC ACIDS RES, V42, pD310, DOI 10.1093/nar/gkt1242; Beaulieu JM, 2011, PHARMACOL REV, V63, P182, DOI 10.1124/pr.1…	74	0	0	10	12	MDPI AG	BASEL	ST ALBAN-ANLAGE 66, CH-4052 BASEL, SWITZERLAND	1420-3049			MOLECULES	Molecules	NOV	2016	21	11							1554	10.3390/molecules21111554
J	Garcia-Godoy, MJ; Lopez-Camacho, E; Garcia-Nieto, J; Nebro, AJ; Aldana-Montes, JF				Jesus Garcia-Godoy, Maria; Lopez-Camacho, Esteban; Garcia-Nieto, Jose; Nebro, Antonio J.; Aldana-Montes, Jose F.			Molecular Docking Optimization in the Context of Multi-Drug Resistant and Sensitive EGFR Mutants	MOLECULES			English	Article						molecular docking; metaheuristics; multi-objective optimization; drug resistance; epidermal growth factor; Epidermal Growth Factor Receptor; Epidermal Growth Factor Receptor mutants	GROWTH-FACTOR RECEPTOR; CELL LUNG-CANCER; GENETIC ALGORITHM; KINASE DOMAIN; MUTATION; GEFITINIB	The human Epidermal Growth Factor (EGFR) plays an important role in signaling pathways, such as cell proliferation and migration. Mutations like G719S, L858R, T790M, G719S/T790M or T790M/L858R can alter its conformation, and, therefore, drug responses from lung cancer patients. In this context, candidate drugs are being tested and in silico studies are necessary to know how these mutations affect…	Ministerio de Ciencia e Innovacion [TIN2011-25840]; Plan Andaluz de Investigacion, Desarrollo e Innovacion [P11-TIC-7529, P12-TIC-1519]	This work is partially funded by Grants TIN2011-25840 (Ministerio de Ciencia e Innovacion) and P11-TIC-7529 and P12-TIC-1519 (Plan Andaluz de Investigacion, Desarrollo e Innovacion).	Berman HM, 2000, NUCLEIC ACIDS RES, V28, P235, DOI 10.1093/nar/28.1.235; Boisson J.C., 2008, P 2008 IEEE S COMP I, P187; Bursulaya BD, 2003, J COMPUT AID MOL DES, V17, P755, DOI 10.1023/B:JCAM.0000017496.76572.6f; Deb K, 2002, IEEE T EVOLUT COMPUT, V6, P182, DOI 10.1109/4235.996017; Doss GPC, 2014, SCI REP-UK, V4, DOI 10.1038/srep05868; Grosdidier A, 2007, PROTEINS, V67, P1010, DOI 10.1002/prot.2…	27	0	0	2	6	MDPI AG	BASEL	ST ALBAN-ANLAGE 66, CH-4052 BASEL, SWITZERLAND	1420-3049			MOLECULES	Molecules	NOV	2016	21	11							1575	10.3390/molecules21111575
J	Uehara, S; Tanaka, S				Uehara, Shota; Tanaka, Shigenori			AutoDock-GIST: Incorporating Thermodynamics of Active-Site Water into Scoring Function for Accurate Protein-Ligand Docking	MOLECULES			English	Article						protein-ligand docking; virtual screening; grid inhomogeneous solvation theory (GIST); AutoDock4; binding-site water	MOLECULAR-DYNAMICS SIMULATIONS; ENTHALPY-ENTROPY COMPENSATION; INHOMOGENEOUS FLUID APPROACH; BINDING-AFFINITY PREDICTION; PARTICLE MESH EWALD; FACTOR XA; FORCE-FIELD; HIV-1 PROTEASE; FREE-ENERGY; SOLVATION THERMODYNAMICS	Water plays a significant role in the binding process between protein and ligand. However, the thermodynamics of water molecules are often underestimated, or even ignored, in protein-ligand docking. Usually, the free energies of active-site water molecules are substantially different from those of waters in the bulk region. The binding of a ligand to a protein causes a displacement of these water…	Ministry of Education, Culture, Sports, Science and Technology (MEXT) [26460035]	The authors would like to thank Kohei Shimamura for useful comments and encouragement throughout this work. One of the authors (S.T.) would like to acknowledge the Grants-in-Aid for Scientific Research (No. 26460035) from the Ministry of Education, Culture, Sports, Science and Technology (MEXT).	Abel R, 2008, J AM CHEM SOC, V130, P2817, DOI 10.1021/ja0771033; Adachi M, 2009, P NATL ACAD SCI USA, V106, P4641, DOI 10.1073/pnas.0809400106; Adler M, 2000, BIOCHEMISTRY-US, V39, P12534, DOI 10.1021/bi001477q; Ahmad M, 2015, J CHEM THEORY COMPUT, V11, P1410, DOI 10.1021/ct501161t; Alvarez-Garcia D, 2014, J MED CHEM, V57, P8530, DOI [10.1021/jm5010418, 10.1021/jm50100418]; BALDWIN ET, 1995, STRU…	100	1	1	7	20	MDPI AG	BASEL	ST ALBAN-ANLAGE 66, CH-4052 BASEL, SWITZERLAND	1420-3049			MOLECULES	Molecules	NOV	2016	21	11							1604	10.3390/molecules21111604
J	Carugo, O				Carugo, Oliviero			Waters in room temperature and cryo protein crystal structures	ZEITSCHRIFT FUR KRISTALLOGRAPHIE-CRYSTALLINE MATERIALS			English	Article						crystallography; protein data bank; protein hydration; protein structure; water	CONCANAVALIN-A; DATA-BANK; MACROMOLECULAR STRUCTURES; RADIATION-DAMAGE; HYDRATION WATER; CRYSTALLOGRAPHY; RESOLUTION; REFINEMENT; MOLECULES; DYNAMICS	Since it has been observed that low temperature protein crystal structures may differ from room temperature structures, it is necessary to compare systematically the protein hydration structure in low and room protein crystal structures. High quality data sets of protein structures were built in an extremely rigorous manner and crystal symmetry was included in the identification of four types of …	Pavia University	I thank Kristina Djinovic for her constant support. This work would have been impossible without the generous funding of the Pavia University.	Ayyer K, 2016, NATURE, V530, P202, DOI 10.1038/nature16949; Berman HM, 2000, NUCLEIC ACIDS RES, V28, P235, DOI 10.1093/nar/28.1.235; BERNSTEIN FC, 1977, J MOL BIOL, V112, P535, DOI 10.1016/S0022-2836(77)80200-3; Blakeley MP, 2004, P NATL ACAD SCI USA, V101, P16405, DOI 10.1073/pnas.0405109101; Burgess J., 1978, METAL IONS SOLUTION; Djinovic Carugo K., 2015, INTRINSICALLY DISORD, V3, P1; CARUGO O,…	36	0	0	3	4	WALTER DE GRUYTER GMBH	BERLIN	GENTHINER STRASSE 13, D-10785 BERLIN, GERMANY	2194-4946	2196-7105		Z KRIST-CRYST MATER	Z. Krist.-Cryst. Mater.	NOV	2016	231	11					681	689		10.1515/zkri-2016-1986
J	Fahs, S; Lujan, P; Kohn, M				Fahs, Sara; Lujan, Pablo; Koehn, Maja			Approaches to Study Phosphatases	ACS CHEMICAL BIOLOGY			English	Review							PROTEIN-TYROSINE PHOSPHATASES; QUANTITATIVE PHOSPHOPROTEOMICS REVEALS; VOLTAGE-SENSING PHOSPHATASE; RESONANCE ENERGY-TRANSFER; SMALL-MOLECULE INHIBITORS; LIVING CELLS; MASS-SPECTROMETRY; PHOSPHATIDYLINOSITOL 4,5-BISPHOSPHATE; SERINE/THREONINE PHOSPHATASES; PHOSPHORYLATION SITES	Phosphatases play key roles in normal physiology and diseases. Studying phosphatases has been both essential and challenging, and the application of conventional genetic and biochemical methods has led to crucial but still limited understanding of their mechanisms, substrates, and exclusive functions within highly intricate networks. With the advances in technologies such as cellular imaging and …			Alonso A, 2004, CELL, V117, P699, DOI 10.1016/j.cell.2004.05.018; Alonso A, 2016, FEBS J, V283, P1404, DOI 10.1111/febs.13600; Ammosova T, 2012, PLOS ONE, V7, DOI 10.1371/journal.pone.0039481; Andersen JN, 2005, METHODS, V35, P90, DOI 10.1016/j.ymeth.2004.07.012; Apweiler R, 2004, NUCLEIC ACIDS RES, V32, pD115, DOI 10.1093/nar/gkh131; Bai YP, 2016, CANCER RES, V76, P4805, DOI 10.1158/0008-5472.CA…	205	2	2	6	14	AMER CHEMICAL SOC	WASHINGTON	1155 16TH ST, NW, WASHINGTON, DC 20036 USA	1554-8929	1554-8937		ACS CHEM BIOL	ACS Chem. Biol.	NOV	2016	11	11					2944	2961		10.1021/acschembio.6b00570
J	Mwalongo, F; Krone, M; Becher, M; Reina, G; Ertl, T				Mwalongo, Finian; Krone, Michael; Becher, Michael; Reina, Guido; Ertl, Thomas			GPU-based remote visualization of dynamic molecular data on the web	GRAPHICAL MODELS			English	Article						Remote visualization; Dynamic data visualization; Web-based visualization; Molecular data visualization; WebGL; GPU-based ray casting		Visualization of dynamic data from molecular dynamics simulations is crucial for understanding the functioning of molecules. Many existing visualization tools have mainly focused on supporting a single user working on a desktop computer. Technical advancements in browser features increase the potential for the development of web-based collaborative visualization tools. Although web-based molecula…	German Academic Exchange Service (DAAD); German Research Foundation (DFG) as part of Collaborative Research Center [SFB 716]	This work was partially funded by German Academic Exchange Service (DAAD) and by German Research Foundation (DFG) as part of Collaborative Research Center SFB 716.	Berman HM, 2000, NUCLEIC ACIDS RES, V28, P235, DOI 10.1093/nar/28.1.235; Blinn JF, 1977, SIGGRAPH 77, P192, DOI DOI 10.1145/563858.563893; Callieri M., 2010, WEB3D 2010; Doulamis N, 2010, STUD COMPUT INTELL, V321, P211; Fette I., 2011, WEBSOCKET PROTOCOL; Grottel S, 2015, IEEE T VIS COMPUT GR, V21, P201, DOI 10.1109/TVCG.2014.2350479; Grottel S, 2012, IEEE PAC VIS SYMP, P209, DOI 10.1109/PacificV…	29	0	0	1	3	ACADEMIC PRESS INC ELSEVIER SCIENCE	SAN DIEGO	525 B ST, STE 1900, SAN DIEGO, CA 92101-4495 USA	1524-0703	1524-0711		GRAPH MODELS	Graph. Models	NOV	2016	88						57	65		10.1016/j.gmod.2016.05.001
J	Kuo, TH; Li, KB				Kuo, Tzu-Hao; Li, Kuo-Bin			Predicting Protein-Protein Interaction Sites Using Sequence Descriptors and Site Propensity of Neighboring Amino Acids	INTERNATIONAL JOURNAL OF MOLECULAR SCIENCES			English	Article						Protein-Protein Interaction; intrinsically-disorder protein; machine learning algorithms	SUPPORT VECTOR MACHINES; PSEUDO NUCLEOTIDE COMPOSITION; LYSINE SUCCINYLATION SITES; PHYSICOCHEMICAL PROPERTIES; EVOLUTIONARY CONSERVATION; STATISTICAL-ANALYSIS; DISORDERED PROTEINS; ENSEMBLE CLASSIFIER; GENOMIC SEQUENCES; BINDING-SITES	Information about the interface sites of Protein-Protein Interactions (PPIs) is useful for many biological research works. However, despite the advancement of experimental techniques, the identification of PPI sites still remains as a challenging task. Using a statistical learning technique, we proposed a computational tool for predicting PPI interaction sites. As an alternative to similar approa…	Ministry of Science and Technology [NSC 101-2221-E-010-010]; National Yang-Ming University, Taiwan	This work was supported by the Ministry of Science and Technology grant (NSC 101-2221-E-010-010) and the National Yang-Ming University, Taiwan.	Altschul SF, 1997, NUCLEIC ACIDS RES, V25, P3389, DOI 10.1093/nar/25.17.3389; Ansari S, 2005, PROTEINS, V61, P344, DOI 10.1002/prot.20593; Ashkenazy H, 2010, NUCLEIC ACIDS RES, V38, pW529, DOI 10.1093/nar/gkq399; Atchley WR, 2005, P NATL ACAD SCI USA, V102, P6395, DOI 10.1073/pnas.0408677102; Berman HM, 2000, NUCLEIC ACIDS RES, V28, P235, DOI 10.1093/nar/28.1.235; Bitbol AF, 2016, P NATL ACAD SCI…	96	0	0	7	9	MDPI AG	BASEL	ST ALBAN-ANLAGE 66, CH-4052 BASEL, SWITZERLAND	1422-0067			INT J MOL SCI	Int. J. Mol. Sci.	NOV	2016	17	11							1788	10.3390/ijms17111788
J	Mirza, MU; Ikram, N				Mirza, Muhammad Usman; Ikram, Nazia			Integrated Computational Approach for Virtual Hit Identification against Ebola Viral Proteins VP35 and VP40	INTERNATIONAL JOURNAL OF MOLECULAR SCIENCES			English	Article						Ebola virus; phytochemicals; molecular docking; VP35; VP40; retrospective validation; virtual screening	MULTIPLE SEQUENCE ALIGNMENT; HIGH-THROUGHPUT; SCORING FUNCTION; VIRUS DISEASE; PROMISCUOUS INHIBITORS; KINASE INHIBITORS; MOLECULAR-DOCKING; PREDICTION; INFECTION; OUTBREAK	The Ebola virus (EBOV) has been recognised for nearly 40 years, with the most recent EBOV outbreak being in West Africa, where it created a humanitarian crisis. Mortalities reported up to 30 March 2016 totalled 11,307. However, up until now, EBOV drugs have been far from achieving regulatory (FDA) approval. It is therefore essential to identify parent compounds that have the potential to be devel…			Abazari D., 2015, BIOINFORMATION; Altschul SF, 1997, NUCLEIC ACIDS RES, V25, P3389, DOI 10.1093/nar/25.17.3389; Babaoglu K, 2008, J MED CHEM, V51, P2502, DOI 10.1021/jm701500e; Baell JB, 2010, J MED CHEM, V53, P2719, DOI 10.1021/jm901137j; Barelier S, 2015, ACS CHEM BIOL, V10, P2772, DOI 10.1021/acschembio.5b00683; Basler CF, 2000, P NATL ACAD SCI USA, V97, P12289, DOI 10.1073/pnas.220398297; Bas…	100	1	1	1	2	MDPI AG	BASEL	ST ALBAN-ANLAGE 66, CH-4052 BASEL, SWITZERLAND	1422-0067			INT J MOL SCI	Int. J. Mol. Sci.	NOV	2016	17	11							1748	10.3390/ijms17111748
J	Wang, Q; Sciabola, S; Barreiro, G; Hou, XJ; Bai, GY; Shapiro, MJ; Koehn, F; Villalobos, A; Jacobson, MP				Wang, Qin; Sciabola, Simone; Barreiro, Gabriela; Hou, Xinjun; Bai, Guoyun; Shapiro, Michael J.; Koehn, Frank; Villalobos, Anabella; Jacobson, Matthew P.			Dihedral Angle-Based Sampling of Natural Product Polyketide Conformations: Application to Permeability Prediction	Journal of Chemical Information and Modeling			English	Article							PASSIVE MEMBRANE-PERMEABILITY; LOCAL OPTIMIZATION PROGRAM; LONG LOOP PREDICTION; MACROLIDE ANTIBIOTICS; CYCLIC-PEPTIDES; MEDICINAL CHEMISTRY; SMALL MOLECULES; SIDE-CHAIN; DISCOVERY; PROTEINS	Macrocycles pose challenges for computer-aided drug design due to their conformational complexity. One fundamental challenge is identifying all low-energy conformations of the macrocyclic ring, which is important for modeling target binding, passive membrane permeation, and other conformation-dependent properties. Macrocyclic polyketides are medically and biologically important natural products c…	Pfizer, Inc.	Gratitude is expressed to Pfizer, Inc., for financial support.	ALBERTS AW, 1988, AM J CARDIOL, V62, pJ10, DOI 10.1016/0002-9149(88)90002-1; Allen FH, 2002, ACTA CRYSTALLOGR B, V58, P380, DOI 10.1107/S0108768102003890; Awan A, 2000, J CHEM SOC PERK T 2, P1645, DOI 10.1039/b003000g; Berman HM, 2000, NUCLEIC ACIDS RES, V28, P235, DOI 10.1093/nar/28.1.235; Bhattacharya A, 2007, PROTEINS, V66, P778, DOI 10.1002/prot.21165; Bonnet P, 2009, J CHEM INF MODEL, V49, P…	52	1	1	3	6	AMER CHEMICAL SOC	WASHINGTON	1155 16TH ST, NW, WASHINGTON, DC 20036 USA	1549-9596	1549-960X		J CHEM INF MODEL	J. Chem Inf. Model.	NOV	2016	56	11					2194	2206		10.1021/acs.jcim.6b00237
J	de Souza, RC; Muniz, GD; Siqueira, AS; Lima, ADM; da Silva, AP; Goncalves, EC; Vianez, JLDG				Conceicao de Souza, Rafael; de Medeiros Muniz, Gabriela; Santos Siqueira, Andrei; de Melo Lima, Adonis; Pereira da Silva, Alessandra; Costa Goncalves, Evonnildo; Goncalves Vianez Junior, Joao Lidio da Silva			Investigating the effects of point mutations on the affinity between the cyanobacterial lectin microvirin and high mannose-type glycans present on the HIV envelope glycoprotein	JOURNAL OF MOLECULAR MODELING			English	Article						Antiviral activity; Bind free energy; Lectin; Microvirin; Molecular dynamics	CYANOVIRIN-N; ALGAL LECTINS; MICROBICIDE; DYNAMICS	Human immunodeficiency virus (HIV) infections continue to exert an enormous impact on global human health. This led experts to emphasize the importance of new measures for preventing HIV infections, including the development of vaccines and novel drugs. In this context, a promising approach involves the use of lectins that can bind the surface envelope glycoprotein gp120 of HIV with high affinity…	Evandro Chagas Institute CNPq/PIBIC program	We would like to thank the Evandro Chagas Institute CNPq/PIBIC program for financial support.	Berman HM, 2000, NUCLEIC ACIDS RES, V28, P235, DOI 10.1093/nar/28.1.235; Case D. A., 2012, AMBER 12 REFERENCE M; DARDEN T, 1993, J CHEM PHYS, V98, P10089, DOI 10.1063/1.464397; Houa T, 2011, J CHEM INF COMP SCI, V51, P69, DOI [10.1021/ci100275a.Assessing, DOI 10.1021/CI100275A.ASSESSING]; Huskens D, 2012, MAR DRUGS, V10, P1476, DOI 10.3390/md10071476; Huskens D, 2010, J BIOL CHEM, V285, P24845, D…	18	0	0	0	3	SPRINGER	NEW YORK	233 SPRING ST, NEW YORK, NY 10013 USA	1610-2940	0948-5023		J MOL MODEL	J. Mol. Model.	NOV	2016	22	11							269	10.1007/s00894-016-3137-3
J	Proietti, G; Abelak, KK; Bishop-Bailey, D; Macchiarulo, A; Nobeli, I				Proietti, G.; Abelak, K. K.; Bishop-Bailey, D.; Macchiarulo, A.; Nobeli, I.			Computational modelling of the binding of arachidonic acid to the human monooxygenase CYP2J2	JOURNAL OF MOLECULAR MODELING			English	Article						CYP2J2; Arachidonic acid; Homology model; Induced fit docking; Molecular dynamics	HUMAN CYTOCHROME-P450 2J2; MUTATION-INDUCED DYSFUNCTION; MOLECULAR-CLONING; CRYSTAL-STRUCTURE; METABOLISM; DISCOVERY; INHIBITORS; IDENTIFICATION; EXPRESSION; SUBSTRATE	An experimentally determined structure for human CYP2J2-a member of the cytochrome P450 family with significant and diverse roles across a number of tissues-does not yet exist. Our understanding of how CYP2J2 accommodates its cognate substrates and how it might be inhibited by other ligands thus relies on our ability to computationally predict such interactions using modelling techniques. In this…	Erasmus Placement Grant from the University of Perugia; Bloomsbury Colleges	G.P. was funded for this work by an Erasmus Placement Grant (2013/2014) received from the University of Perugia. K.K.A. is funded by a Bloomsbury Colleges PhD studentship.	Askari A, 2013, PROSTAG OTH LIPID M, V107, P56, DOI 10.1016/j.prostaglandins.2013.02.003; Askari AA, 2014, BIOCHEM BIOPH RES CO, V446, P633, DOI 10.1016/j.bbrc.2014.03.020; Banks JL, 2005, J COMPUT CHEM, V26, P1752, DOI 10.1002/jcc.20292; Benkert P, 2009, NUCLEIC ACIDS RES, V37, pW510, DOI 10.1093/nar/gkp322; Berman HM, 2000, NUCLEIC ACIDS RES, V28, P235, DOI 10.1093/nar/28.1.235; Bhattarai S, 20…	51	0	0	6	10	SPRINGER	NEW YORK	233 SPRING ST, NEW YORK, NY 10013 USA	1610-2940	0948-5023		J MOL MODEL	J. Mol. Model.	NOV	2016	22	11							279	10.1007/s00894-016-3134-6
J	Doak, BC; Norton, RS; Scanlon, MJ				Doak, Bradley C.; Norton, Raymond S.; Scanlon, Martin J.			The ways and means of fragment-based drug design	PHARMACOLOGY & THERAPEUTICS			English	Review						Screening; Protein; Medicinal chemistry; Structure-based drug design	DYNAMIC COMBINATORIAL CHEMISTRY; ASPARTIC PROTEASE ENDOTHIAPEPSIN; DIRECTED LIGAND DISCOVERY; TARGET-GUIDED SYNTHESIS; SITU CLICK CHEMISTRY; IN-SITU; LEAD DISCOVERY; CHEMICAL SPACE; LACTATE-DEHYDROGENASE; SUCCESSFUL GENERATION	Fragment-based drug design (FBDD) has emerged as a mainstream approach for the rapid and efficient identification of building blocks that can be used to develop high-affinity ligands against protein targets. One of the strengths of FBDD is the relative ease and low cost of the primary screen to identify fragments that bind. However, the fragments that emerge from primary screens often have low af…			Addie M, 2013, J MED CHEM, V56, P2059, DOI 10.1021/jm301762v; Allen CE, 2015, ORG LETT, V17, P458, DOI 10.1021/ol503486t; ANDREWS PR, 1984, J MED CHEM, V27, P1648, DOI 10.1021/jm00378a021; Baker M, 2013, NAT REV DRUG DISCOV, V12, P5, DOI 10.1038/nrd3926; Bamborough P, 2011, J MED CHEM, V54, P5131, DOI 10.1021/jm200349b; Banerjee S, 2016, SCIENCE, V351, P871, DOI 10.1126/science.aad7974; Berman HM…	111	0	0	10	30	PERGAMON-ELSEVIER SCIENCE LTD	OXFORD	THE BOULEVARD, LANGFORD LANE, KIDLINGTON, OXFORD OX5 1GB, ENGLAND	0163-7258			PHARMACOL THERAPEUT	Pharmacol. Ther.	NOV	2016	167						28	37		10.1016/j.pharmthera.2016.07.003
J	Rajendran, V; Gopalakrishnan, C; Purohit, R				Rajendran, Vidya; Gopalakrishnan, Chandrasekhar; Purohit, Rituraj			Impact of point mutation P29S in RAC1 on tumorigenesis	TUMOR BIOLOGY			English	Article						Interaction energy; Molecular dynamics; Regulatory partner; Docking	PROTEIN; PREDICTION; BINDING; FAMILY; GTPASE	A point mutation (P29S) in the RAS-related C3 botulinum toxin substrate 1 (RAC1) was considered to be a trigger for melanoma, a form of skin cancer with highest mortality rate. In this study, we have investigated the pathogenic role of P29S based on the conformational behavior of RAC1 protein toward guanosine triphosphate (GTP). Molecular interaction, molecular dynamics trajectory analysis (RMSD,…			Agarwal PK, 2004, S COMP GEO, V20, P357; AMADEI A, 1993, PROTEINS, V17, P412, DOI 10.1002/prot.340170408; BERENDSEN HJC, 1984, J CHEM PHYS, V81, P3684, DOI 10.1063/1.448118; Berendsen HJC, 1981, INTERMOL FORCES, V14, P331, DOI [10.1007/978-94-015-7658-1_21, DOI 10.1007/978-94-015-7658-1_21]; Berman HM, 2000, NUCLEIC ACIDS RES, V28, P235, DOI 10.1093/nar/28.1.235; Bristow JM, 2009, J CELL SCI, V12…	40	5	5	2	3	SPRINGER	DORDRECHT	VAN GODEWIJCKSTRAAT 30, 3311 GZ DORDRECHT, NETHERLANDS	1010-4283	1423-0380		TUMOR BIOL	Tumor Biol.	NOV	2016	37	11					15293	15304		10.1007/s13277-016-5329-y
J	Xu, C; Ishikawa, H; Izumikawa, K; Li, L; He, H; Nobe, Y; Yamauchi, Y; Shahjee, HM; Wu, XH; Yu, YT; Isobe, T; Takahashi, N; Min, J				Xu, Chao; Ishikawa, Hideaki; Izumikawa, Keiichi; Li, Li; He, Hao; Nobe, Yuko; Yamauchi, Yoshio; Shahjee, Hanief M.; Wu, Xian-Hui; Yu, Yi-tao; Isobe, Toshiaki; Takahashi, Nobuhiro; Min, Jinrong			Structural insights into Gemin5-guided selection of pre-snRNAs for snRNP assembly	GENES & DEVELOPMENT			English	Article						SMN complex; WD40 domain; X-ray crystal structure	TANDEM MASS-SPECTROMETRY; CAP-BINDING PROTEIN; X-RAY-DIFFRACTION; SMN COMPLEX; MESSENGER-RNA; WD-REPEAT; SMALL NUCLEAR; DATA-BANK; U1 SNRNA; IDENTIFICATION	In cytoplasm, the survival of motor neuron (SMN) complex delivers pre-small nuclear RNAs (pre-snRNAs) to the heptameric Sm ring for the assembly of the ring complex on pre-snRNAs at the conserved Sm site [ A(U) 4-6G]. Gemin5, a WD40 protein component of the SMN complex, is responsible for recognizing pre-snRNAs. In addition, Gemin5 has been reported to specifically bind to the m7G cap. In this st…	National Cancer Institute [ACB-12002]; National Institute of General Medical Sciences [AGM-12006]; DOE Office of Science by Argonne National Laboratory [DE-AC02-06CH11357]; AbbVie; Bayer Pharma AG; BoehringerIngelheim; Canada Foundation for Innovation; Eshelman Institute for Innovation; Genome Canada through the Ontario Genomics Institute; Innovative Medicines Initiative (European Union/European …	We thank Dr. Tanja Cerovina, Dr. Wolfram Tempel, Dr. Aiping Dong, and Dr. Qi Zhang for technical assistance, and Peter J. Brown for stimulating discussion. We also thank Shelton S. Bradrick for kindly providing the DNA templates and plasmids and for helpful discussions. We also thank Dr. Rui-ming Xu for communication of his data and helpful discussion prior to publication. Results shown in this r…	Agafonov DE, 2016, SCIENCE, V351, P1416, DOI 10.1126/science.aad2085; Battle DJ, 2006, COLD SPRING HARB SYM, V71, P313, DOI 10.1101/sqb.2006.71.001; Battle DJ, 2007, J BIOL CHEM, V282, P27953, DOI 10.1074/jbc.M702317200; Battle DJ, 2006, MOL CELL, V23, P273, DOI 10.1016/j.molcel.2006.05.036; Berman HM, 2000, NUCLEIC ACIDS RES, V28, P235, DOI 10.1093/nar/28.1.235; Bradrick SS, 2009, PLOS ONE, V4, …	66	5	5	1	6	COLD SPRING HARBOR LAB PRESS, PUBLICATIONS DEPT	COLD SPRING HARBOR	1 BUNGTOWN RD, COLD SPRING HARBOR, NY 11724 USA	0890-9369	1549-5477		GENE DEV	Genes Dev.	2018-11-01	2016	30	21					2376	2390		10.1101/gad.288340.116
J	Singh, A; Tessier, MB; Pederson, K; Wang, XC; Venot, AP; Boons, GJ; Prestegard, JH; Woods, RJ				Singh, Arunima; Tessier, Matthew B.; Pederson, Kari; Wang, Xiaocong; Venot, Andre P.; Boons, Geert-Jan; Prestegard, James H.; Woods, Robert J.			Extension and validation of the GLYCAM force field parameters for modeling glycosaminoglycans	CANADIAN JOURNAL OF CHEMISTRY			English	Article						force field development; GLYCAM; glycosaminoglycans; heparin	MOLECULAR-DYNAMICS SIMULATIONS; SOLUTION CONFORMATION; GENERALIZED BORN; NMR-SPECTROSCOPY; HEPARAN-SULFATE; LIPID-BILAYERS; IDURONIC ACID; PROTEOGLYCANS; ELECTRONEGATIVITIES; MONOSACCHARIDES	Glycosaminoglycans (GAGs) are an important class of carbohydrates that serve critical roles in blood clotting, tissue repair, cell migration and adhesion, and lubrication. The variable sulfation pattern and iduronate ring conformations in GAGs influence their polymeric structure and nature of interaction. This study characterizes several heparin-like GAG disaccharides and tetrasaccharides using N…	National Institutes of Health [R01 GM100058, P41 GM103390]	The authors thank the National Institutes of Health for support (R01 GM100058, P41 GM103390).	Allen FH, 2002, ACTA CRYSTALLOGR B, V58, P380, DOI 10.1107/S0108768102003890; ALTONA C, 1994, MAGN RESON CHEM, V32, P670, DOI 10.1002/mrc.1260321107; San Antonio J. D., 2001, ELS, DOI [10.1038/npg.els.0000704, DOI 10.1038/NPG.ELS.0000704]; Basma M, 2001, J COMPUT CHEM, V22, P1125, DOI 10.1002/jcc.1072; Bazin HG, 1998, CARBOHYD RES, V309, P135, DOI 10.1016/S0008-6215(98)00118-9; BERENDSEN HJC, 198…	51	4	4	4	9	CANADIAN SCIENCE PUBLISHING, NRC RESEARCH PRESS	OTTAWA	65 AURIGA DR, SUITE 203, OTTAWA, ON K2E 7W6, CANADA	0008-4042	1480-3291		CAN J CHEM	Can. J. Chem.	NOV	2016	94	11			SI		927	935		10.1139/cjc-2015-0606
J	Tan, YX; Hu, Y; Liu, XX; Yin, ZN; Chen, XW; Liu, M				Tan, Yuxiang; Hu, Yong; Liu, Xiaoxiao; Yin, Zhinan; Chen, Xue-wen; Liu, Mei			Improving drug safety: From adverse drug reaction knowledge discovery to clinical implementation	METHODS			English	Article						Drug-target interaction; Drug safety; Adverse drug reaction; Pharmacogenomic	ELECTRONIC HEALTH RECORDS; TARGET INTERACTION NETWORKS; GENE-EXPRESSION SIGNATURES; SIGNAL-DETECTION METHODS; GENOME-WIDE ASSOCIATION; POSTMARKETING SURVEILLANCE; HOSPITALIZED-PATIENTS; EMPIRICAL-EVALUATION; GENOTYPE IMPUTATION; DOSAGE ADJUSTMENT	Adverse drug reactions (ADRs) are a major public health concern, causing over 100,000 fatalities in the United States every year with an annual cost of $136 billion. Early detection and accurate prediction of ADRs is thus vital for drug development and patient safety. Multiple scientific disciplines, namely pharmacology, pharmacovigilance, and pharmacoinformatics, have been addressing the ADR pro…	Guangdong Innovative and Entrepreneurial Research Team Program [201301S0105240297]; Major International Joint Research Program of China [31420103901]; National Science Foundation of China [71271061, 70801020]; Science and Technology Planning Project of Guangdong Province, China [2010B010600034, 2012B091100192]; National Science Foundation [OIA-1028098]	The authors would like to thank the support from a number of research grants. Y.T. is supported by Guangdong Innovative and Entrepreneurial Research Team Program (No. 201301S0105240297) and Major International Joint Research Program of China (Grant 31420103901). Y.H. is supported by the National Science Foundation of China (71271061, 70801020), Science and Technology Planning Project of Guangdong…	Ahmed I, 2010, CLIN PHARMACOL THER, V88, P492, DOI 10.1038/clpt.2010.111; Ahmed I, 2010, BIOMETRICS, V66, P301, DOI 10.1111/j.1541-0420.2009.01262.x; Ahmed I, 2009, STAT MED, V28, P1774, DOI 10.1002/sim.3586; Aliferis CF, 2010, J MACH LEARN RES, V11, P171; Almenoff JS, 2007, CLIN PHARMACOL THER, V82, P157, DOI 10.1038/sj.clpt.2007.6100258; An LH, 2010, J BIOPHARM STAT, V20, P998, DOI 10.1080/1054…	138	2	3	4	11	ACADEMIC PRESS INC ELSEVIER SCIENCE	SAN DIEGO	525 B ST, STE 1900, SAN DIEGO, CA 92101-4495 USA	1046-2023	1095-9130		METHODS	Methods	2018-11-01	2016	110						14	25		10.1016/j.ymeth.2016.07.023
J	Hu, J; Zhang, XL				Hu, Jing; Zhang, Xiaolong			Improving hot region prediction by parameter optimization of density clustering in PPI	METHODS			English	Article						Hot region; Density; Clustering; Parameter selection; Protein-protein interaction	PROTEIN INTERFACES; SOLVENT ACCESSIBILITY; SPOTS; DATABASE	This paper proposed an optimized algorithm which combines density clustering of parameter selection with feature-based classification for hot region prediction. First, all the residues are classified by SVM to remove non-hot spot residues, then density clustering of parameter selection is used to find hot regions. In the density clustering, this paper studies how to select input parameters. There…	National Natural Science Foundation of China [61273225, 61201423]; Young Science and Technology Outstanding Training Plan of Wuhan University of Science and Technology [2013xz014]	This work is supported by the National Natural Science Foundation of China (Nos. 61273225, 61201423), Young Science and Technology Outstanding Training Plan of Wuhan University of Science and Technology (No. 2013xz014). Thanks to Dongfang Nan, Bingqing Tan and Jing Ye in our lab for their meaningful discussion.	Berman HM, 2000, NUCLEIC ACIDS RES, V28, P235, DOI 10.1093/nar/28.1.235; Bogan AA, 1998, J MOL BIOL, V280, P1, DOI 10.1006/jmbi.1998.1843; CORTES C, 1995, MACH LEARN, V20, P273, DOI 10.1023/A:1022627411411; Cukuroglu E, 2012, NUCLEIC ACIDS RES, V40, pD829, DOI 10.1093/nar/gkr929; Cukuroglu E, 2010, ANN BIOMED ENG, V38, P2068, DOI 10.1007/s10439-010-0048-9; Guney E, 2008, NUCLEIC ACIDS RES, V36, p…	21	1	1	3	8	ACADEMIC PRESS INC ELSEVIER SCIENCE	SAN DIEGO	525 B ST, STE 1900, SAN DIEGO, CA 92101-4495 USA	1046-2023	1095-9130		METHODS	Methods	2018-11-01	2016	110						35	43		10.1016/j.ymeth.2016.07.017
J	Hu, J; Li, JR; Chen, NS; Zhang, XL				Hu, Jing; Li, Jiarui; Chen, Nansheng; Zhang, Xiaolong			Conservation of hot regions in protein-protein interaction in evolution	METHODS			English	Article						Hot region; Protein-protein interaction; Conservation; Evolution	PREDICTION; ORGANIZATION; INTERFACES; RESIDUES; DATABASE; BINDING; SITES	The hot regions of protein-protein interactions refer to the active area which formed by those most important residues to protein combination process. With the research development on protein interactions, lots of predicted hot regions can be discovered efficiently by intelligent computing methods, while performing biology experiments to verify each every prediction is hardly to be done due to th…	National Natural Science Foundation of China [61273225, 61201423]; Young Science and Technology Outstanding Training Plan of Wuhan University of Science and Technology [2013xz014]; Natural Science and Engineering Research Council of Canada [RGPIN-2014-06018]	This work is supported by the National Natural Science Foundation of China (No. 61273225, 61201423), Young Science and Technology Outstanding Training Plan of Wuhan University of Science and Technology (No. 2013xz014), Natural Science and Engineering Research Council of Canada (No. RGPIN-2014-06018). Thanks to all the members in Chen lab of Molecular Biology and Biochemistry department in Simon F…	Aloy P, 2001, J MOL BIOL, V311, P395, DOI 10.1006/jmbi.2001.4870; Berman HM, 2000, NUCLEIC ACIDS RES, V28, P235, DOI 10.1093/nar/28.1.235; Bogan AA, 1998, J MOL BIOL, V280, P1, DOI 10.1006/jmbi.1998.1843; Caffrey DR, 2004, PROTEIN SCI, V13, P190, DOI 10.1110/ps.03323604; Chen F, 2006, NUCLEIC ACIDS RES, V34, pD363, DOI 10.1093/nar/gkj123; Cukuroglu E, 2012, NUCLEIC ACIDS RES, V40, pD829, DOI 10.1…	22	2	2	1	10	ACADEMIC PRESS INC ELSEVIER SCIENCE	SAN DIEGO	525 B ST, STE 1900, SAN DIEGO, CA 92101-4495 USA	1046-2023	1095-9130		METHODS	Methods	2018-11-01	2016	110						73	80		10.1016/j.ymeth.2016.06.020
J	Krupa, P; Mozolewska, MA; Wisniewska, M; Yin, YP; He, Y; Sieradzan, AK; Ganzynkowicz, R; Lipska, AG; Karczynska, A; Slusarz, M; Slusarz, R; Gieldon, A; Czaplewski, C; Jagiela, D; Zaborowski, B; Scheraga, HA; Liwo, A				Krupa, Pawel; Mozolewska, Magdalena A.; Wisniewska, Marta; Yin, Yanping; He, Yi; Sieradzan, Adam K.; Ganzynkowicz, Robert; Lipska, Agnieszka G.; Karczynska, Agnieszka; Slusarz, Magdalena; Slusarz, Rafal; Gieldon, Artur; Czaplewski, Cezary; Jagiela, Dawid; Zaborowski, Bartlomiej; Scheraga, Harold A.; Liwo, Adam			Performance of protein-structure predictions with the physics-based UNRES force field in CASP11	BIOINFORMATICS			English	Article							POTENTIAL-ENERGY FUNCTION; MOLECULAR-DYNAMICS SIMULATION; LOCAL CONFORMATIONAL STATES; UNITED-RESIDUE MODEL; MONTE-CARLO; GLOBAL OPTIMIZATION; POLYPEPTIDE-CHAINS; ALL-ATOM; BACKBONE; SYSTEMS	Participating as the Cornell-Gdansk group, we have used our physics-based coarsegrained UNited RESidue (UNRES) force field to predict protein structure in the 11th Community Wide Experiment on the Critical Assessment of Techniques for Protein Structure Prediction (CASP11). Our methodology involved extensive multiplexed replica exchange simulations of the target proteins with a recently improved U…	Polish National Science Centre [UMO-2012/06/A/ST4/00376, UMO-2015/17/N/ST4/03937]; Foundation for Polish Science (FNP) [Mistrz 7./2013]; US National Institutes of Health [GM-14312]; US National Science Foundation [MCB10-19767]	This work was supported by grant UMO-2012/06/A/ST4/00376 and grant UMO-2015/17/N/ST4/03937 from the Polish National Science Centre, by grant Mistrz 7./2013 from the Foundation for Polish Science (FNP), by grants from the US National Institutes of Health (GM-14312) and the US National Science Foundation (MCB10-19767). This research was supported by an allocation of advanced computing resources pro…	ANFINSEN CB, 1973, SCIENCE, V181, P223, DOI 10.1126/science.181.4096.223; Ayton GS, 2007, CURR OPIN STRUC BIOL, V17, P192, DOI 10.1016/j.sbi.2007.03.004; Berman HM, 2000, NUCLEIC ACIDS RES, V28, P235, DOI 10.1093/nar/28.1.235; Buchan DWA, 2013, NUCLEIC ACIDS RES, V41, pW349, DOI 10.1093/nar/gkt381; Czaplewski C, 2009, J CHEM THEORY COMPUT, V5, P627, DOI 10.1021/ct800397z; Dill KA, 2012, SCIENCE, …	62	6	6	0	7	OXFORD UNIV PRESS	OXFORD	GREAT CLARENDON ST, OXFORD OX2 6DP, ENGLAND	1367-4803	1460-2059		BIOINFORMATICS	Bioinformatics	2018-11-01	2016	32	21					3270	3278		10.1093/bioinformatics/btw404
J	Buyuk, I; Inal, B; Ilhan, E; Tanriseven, M; Aras, S; Erayman, M				Buyuk, Ilker; Inal, Behcet; Ilhan, Emre; Tanriseven, Mehmet; Aras, Sumer; Erayman, Mustafa			Genome-wide identification of salinity responsive HSP70s in common bean	MOLECULAR BIOLOGY REPORTS			English	Article						HSP70; Genome-wide analysis; RNAseq; qRT-PCR; Salt stress; Phaseolus vulgaris	HEAT-SHOCK PROTEINS; DROUGHT-STRESS TOLERANCE; GENE FAMILY; ARABIDOPSIS-THALIANA; MOLECULAR CHAPERONES; TRANSCRIPTION FACTOR; EXPRESSION ANALYSIS; CONFERS TOLERANCE; OVER-EXPRESSION; KEY REGULATOR	The present study is aimed to identify and characterize HSP70 (PvHSP70) genes in two different common bean cultivars under salt stress. For this purpose various in silico methods such as RNAseq data and qRT-PCR analysis were used. A total of 24 candidate PvHSP70 gene were identified. Except for chromosome 4 and 7, these candidate PvHSP70 genes were distributed on the remaining chromosomes. While …			Ahuja I, 2010, TRENDS PLANT SCI, V15, P664, DOI 10.1016/j.tplants.2010.08.002; Alvim FC, 2001, PLANT PHYSIOL, V126, P1042, DOI 10.1104/pp.126.3.1042; Augustine SM, 2015, PLANT CELL PHYSIOL, V56, P2368, DOI 10.1093/pcp/pcv142; Bailey TL, 2006, NUCLEIC ACIDS RES, V34, pW369, DOI 10.1093/nar/gkl198; Bartels D, 2005, CRIT REV PLANT SCI, V24, P23, DOI 10.1080/07352680590910410; Berman HM, 2000, NUCLEI…	77	3	3	5	18	SPRINGER	DORDRECHT	VAN GODEWIJCKSTRAAT 30, 3311 GZ DORDRECHT, NETHERLANDS	0301-4851	1573-4978		MOL BIOL REP	Mol. Biol. Rep.	NOV	2016	43	11					1251	1266		10.1007/s11033-016-4057-0
J	Seufert, F; Kuhn, M; Hein, M; Weiwad, M; Vivoli, M; Norville, IH; Sarkar-Tyson, M; Marshall, LE; Schweimer, K; Bruhn, H; Rosch, P; Harmer, NJ; Sotriffer, CA; Holzgrabe, U				Seufert, Florian; Kuhn, Maximilian; Hein, Michael; Weiwad, Matthias; Vivoli, Mirella; Norville, Isobel H.; Sarkar-Tyson, Mitali; Marshall, Laura E.; Schweimer, Kristian; Bruhn, Heike; Roesch, Paul; Harmer, Nicholas J.; Sotriffer, Christoph A.; Holzgrabe, Ulrike			Development, synthesis and structure-activity-relationships of inhibitors of the macrophage infectivity potentiator (Mip) proteins of Legionella pneumophila and Burkholderia pseudomallei	BIOORGANIC & MEDICINAL CHEMISTRY			English	Article						Burkholderia pseudomallei; Legionella pneumophila; Macrophage infectivity potentiator protein; Synthesis; Docking analysis; Structure-activity-relationships	ISOMERASE ACTIVITY; INTRACELLULAR INFECTION; GENETIC ALGORITHM; RAPAMYCIN; COMPLEX; MELIOIDOSIS; VIRULENCE; CELLS; DERIVATIVES; ENABLES	The bacteria Burkholderia pseudomallei and Legionella pneumophila cause severe diseases like melioidosis and Legionnaire's disease with high mortality rates despite antibiotic treatment. Due to increasing antibiotic resistances against these and other Gram-negative bacteria, alternative therapeutical strategies are in urgent demand. As a virulence factor, the macrophage infectivity potentiator (M…	Deutsche Forschungsgemeinschaft (Bonn, Germany) [SFB 630]; North Atlantic Treaty Organization (NATO, Brussels, Belgium); [DSTLX-1000094053]	This work was financially supported by the Deutsche Forschungsgemeinschaft (Bonn, Germany; grant SFB 630) and by grant DSTLX-1000094053 for Nicholas J. Harmer, as well as the North Atlantic Treaty Organization (NATO, Brussels, Belgium). Thanks are due to Svetlana Sologub for conducting the cytotoxicity assays.	Allen FH, 2002, ACTA CRYSTALLOGR B, V58, P380, DOI 10.1107/S0108768102003890; Begley DW, 2014, ANTIMICROB AGENTS CH, V58, P1458, DOI 10.1128/AAC.01875-13; Berman HM, 2000, NUCLEIC ACIDS RES, V28, P235, DOI 10.1093/nar/28.1.235; Butler D, 2012, NATURE, V490, P456, DOI 10.1038/490456a; Case D. A., 2012, AMBER 12; Ceymann A, 2008, BMC STRUCT BIOL, V8, DOI 10.1186/1472-6807-8-17; Chemical Computing G…	54	1	1	1	4	PERGAMON-ELSEVIER SCIENCE LTD	OXFORD	THE BOULEVARD, LANGFORD LANE, KIDLINGTON, OXFORD OX5 1GB, ENGLAND	0968-0896	1464-3391		BIOORGAN MED CHEM	Bioorg. Med. Chem.	2018-11-01	2016	24	21					5134	5147		10.1016/j.bmc.2016.08.025
J	Khomenko, T; Zakharenko, A; Odarchenko, T; Arabshahi, HJ; Sannikova, V; Zakharova, O; Korchagina, D; Reynisson, J; Volcho, K; Salakhutdinov, N; Lavrik, O				Khomenko, Tatyana; Zakharenko, Alexandra; Odarchenko, Tatyana; Arabshahi, Homayon John; Sannikova, Victoriya; Zakharova, Olga; Korchagina, Dina; Reynisson, Johannes; Volcho, Konstantin; Salakhutdinov, Nariman; Lavrik, Olga			New inhibitors of tyrosyl-DNA phosphodiesterase I (Tdp 1) combining 7-hydroxycoumarin and monoterpenoid moieties	BIOORGANIC & MEDICINAL CHEMISTRY			English	Article						Tyrosyl-DNA Phosphodiesterase I inhibitor; Coumarin; Monoterpene; Molecular modeling	EMPIRICAL SCORING FUNCTIONS; PROTEIN-LIGAND DOCKING; BIOLOGICAL EVALUATION; NATURAL-PRODUCTS; DATA-BANK; DERIVATIVES; DRUG; MODULATION; COMPLEXES; DISCOVERY	A number of derivatives of 7-hydroxycoumarins containing aromatic or monoterpene substituents at hydroxy-group were synthesized based on a hit compound from a virtual screen. The ability of these compounds to inhibit tyrosyl-DNA phosphodiesterase I (Tdp 1), important target for anti-cancer therapy, was studied for the first time. It was found that the 7-hydroxycoumarin derivatives with monoterpen…	Russian Scientific Foundation [16-13-10074]	This work was supported by Russian Scientific Foundation (grant 16-13-10074).	ALLINGER NL, 1977, J AM CHEM SOC, V99, P8127, DOI 10.1021/ja00467a001; Arabshahi HJ, 2015, MEDCHEMCOMM, V6, P1987, DOI 10.1039/c5md00245a; ARAKI S, 1991, J ORG CHEM, V56, P2538, DOI 10.1021/jo00007a050; Axerio-Cilies P, 2009, EUR J MED CHEM, V44, P1128, DOI 10.1016/j.ejmech.2008.06.013; Bade R, 2010, EUR J MED CHEM, V45, P5646, DOI 10.1016/j.ejmech.2010.09.018; Beretta GL, 2010, CURR MED CHEM, V1…	45	3	3	1	10	PERGAMON-ELSEVIER SCIENCE LTD	OXFORD	THE BOULEVARD, LANGFORD LANE, KIDLINGTON, OXFORD OX5 1GB, ENGLAND	0968-0896	1464-3391		BIOORGAN MED CHEM	Bioorg. Med. Chem.	2018-11-01	2016	24	21					5573	5581		10.1016/j.bmc.2016.09.016
J	Buchholz, PCF; Vogel, C; Reusch, W; Pohl, M; Rother, D; Spiess, AC; Pleiss, J				Buchholz, Patrick C. F.; Vogel, Constantin; Reusch, Waldemar; Pohl, Martina; Rother, Doerte; Spiess, Antje C.; Pleiss, Juergen			BioCatNet: A Database System for the Integration of Enzyme Sequences and Biocatalytic Experiments	CHEMBIOCHEM			English	Article						biocatalysis; data management; enzymes; kinetics; protein design; sequence-function relationship	ENGINEERING DATABASE; PROTEIN FAMILIES; IDENTIFICATION; SELECTIVITY; TOOL; THERMOSTABILITY; SUPERFAMILY; SPECIFICITY; NAVIGATION; POSITIONS	The development of novel enzymes for biocatalytic processes requires knowledge on substrate profile and selectivity; this can be derived from databases and from publications. Often, these sources lack time-course data for the substrate or product, and an unambiguous link between experiment and enzyme sequence. The lack of integrated, original data hampers the comprehensive analysis of enzyme kine…	Deutsche Forschungsgemeinschaft [FOR 1296]	The authors thank Anna Baierl, Maryam Beigi, Saskia Bock, Alexander Fries, Sabrina Loschonsky, Michael Muller, Rudiger Ohs, Simon Waltzer, and Robert Westphal for valuable discussion on the data model and the necessary standardization in biocatalysis, as well as helpful suggestions concerning the user interface. Support of Michael Widmann in the early phase of the development of the BioCatNet sys…	Adrio Jose L, 2014, Biomolecules, V4, P117, DOI 10.3390/biom4010117; Anbar M, 2012, APPL ENVIRON MICROB, V78, P3458, DOI 10.1128/AEM.07985-11; Apweiler R, 2014, NUCLEIC ACIDS RES, V42, pD191, DOI 10.1093/nar/gkt1140; Apweiler R, 2010, NAT CHEM BIOL, V6, P785, DOI 10.1038/nchembio.460; Benson DA, 2011, NUCLEIC ACIDS RES, V39, pD32, DOI 10.1093/nar/gkq1079; Berman HM, 2000, NUCLEIC ACIDS RES, V28, …	57	0	0	1	6	WILEY-V C H VERLAG GMBH	WEINHEIM	POSTFACH 101161, 69451 WEINHEIM, GERMANY	1439-4227	1439-7633		CHEMBIOCHEM	ChemBioChem	NOV	2016	17	21					2093	2098		10.1002/cbic.201600462
J	Barrett, CL; Li, TJX; Reidys, CM				Barrett, Christopher L.; Li, Thomas J. X.; Reidys, Christian M.			RNA Secondary Structures Having a Compatible Sequence of Certain Nucleotide Ratios	JOURNAL OF COMPUTATIONAL BIOLOGY			English	Article						compatible sequence; generating function; nucleotide ratio; RNA secondary structure; singularity analysis	FOLDING FREE-ENERGIES; MESSENGER-RNAS; COMBINATORICS	Given a random RNA secondary structure, S, we study RNA sequences having fixed ratios of nucleotides that are compatible with S. We perform this analysis for RNA secondary structures subject to various base-pairing rules and minimum arc-and stack-length restrictions. Our main result reads as follows: in the simplex of nucleotide ratios, there exists a convex region, in which, in the limit of long…			Bender E. A., 1973, J COMB THEORY A, V15, P91, DOI 10.1016/0097-3165(73)90038-1; Berman HM, 2000, NUCLEIC ACIDS RES, V28, P235, DOI 10.1093/nar/28.1.235; Buratti E, 2004, MOL CELL BIOL, V24, P10505, DOI 10.1128/MCB.24.24.10505-10514.2004; Diprose JM, 2002, J VIROL, V76, P9533, DOI 10.1128/JVI.76.18.9533-9536.2002; Flajolet P., 2009, ANAL COMBINATORICS; FONTANA W, 1993, BIOPOLYMERS, V33, P1389, DO…	32	0	0	0	0	MARY ANN LIEBERT, INC	NEW ROCHELLE	140 HUGUENOT STREET, 3RD FL, NEW ROCHELLE, NY 10801 USA	1066-5277	1557-8666		J COMPUT BIOL	J. Comput. Biol.	NOV	2016	23	11					857	873		10.1089/cmb.2016.0049
J	Singh, AR; Joshi, S; Burgoyne, AM; Sicklick, JK; Ikeda, S; Kono, Y; Garlich, JR; Morales, GA; Durden, DL				Singh, Alok R.; Joshi, Shweta; Burgoyne, Adam M.; Sicklick, Jason K.; Ikeda, Sadakatsu; Kono, Yuko; Garlich, Joseph R.; Morales, Guillermo A.; Durden, Donald L.			Single Agent and Synergistic Activity of the "First-in-Class" Dual PI3K/BRD4 Inhibitor SF1126 with Sorafenib in Hepatocellular Carcinoma	MOLECULAR CANCER THERAPEUTICS			English	Article							BET BROMODOMAIN INHIBITION; ANTIANGIOGENIC ACTIVITY; MOLECULAR THERAPIES; CELL-PROLIFERATION; TUMOR-GROWTH; C-MYC; CANCER; ANTITUMOR; KINASE; BRD4	Deregulated PI3K/AKT/mTOR, Ras/Raf/MAPK, and c-Myc signaling pathways are of prognostic significance in hepatocellular carcinoma (HCC). Sorafenib, the only drug clinically approved for patients with advanced HCC, blocks the Ras/Raf/ MAPK pathway but it does not inhibit the PI3K/AKT/mTOR pathway or c-Myc activation. Hence, there is an unmet medical need to identify potent PI3K/BRD4 inhibitors, whi…	NIH [RO1 CA94233-09]; FDA [FD-004385, R41 CA192656]; ALSF (Springboard Grant); Hyundai Hope on Wheels Foundation; Olivia Hudson Foundation NIH [K08 CA168999, P30CA023100]; Hope Grant	This work was supported by NIH grant RO1 CA94233-09, FDA RO1 grant FD-004385, R41 CA192656 (to D.L. Durden), and grants from ALSF (Springboard Grant) and Hyundai Hope on Wheels Foundation, Hope Grant and the Olivia Hudson Foundation NIH K08 CA168999 (to J. K. Sicklick) and P30CA023100 (to S. Lippmann).	Berman HM, 2000, NUCLEIC ACIDS RES, V28, P235, DOI 10.1093/nar/28.1.235; Chaparro M, 2008, ALIMENT PHARM THER, V28, P1269, DOI 10.1111/j.1365-2036.2008.03857.x; Chen Chuan, 2015, World J Hepatol, V7, P1964, DOI 10.4254/wjh.v7.i15.1964; CHOU TC, 1984, ADV ENZYME REGUL, V22, P27, DOI 10.1016/0065-2571(84)90007-4; Dang CV, 2012, CELL, V149, P22, DOI 10.1016/j.cell.2012.03.003; Delmore JE, 2011, CELL…	47	3	3	2	6	AMER ASSOC CANCER RESEARCH	PHILADELPHIA	615 CHESTNUT ST, 17TH FLOOR, PHILADELPHIA, PA 19106-4404 USA	1535-7163	1538-8514		MOL CANCER THER	Mol. Cancer Ther.	2018-11-01	2016	15	11					2553	2562		10.1158/1535-7163.MCT-15-0976
J	Torres, MP; Dewhurst, H; Sundararaman, N				Torres, Matthew P.; Dewhurst, Henry; Sundararaman, Niveda			Proteome-wide Structural Analysis of PTM Hotspots Reveals Regulatory Elements Predicted to Impact Biological Function and Disease	MOLECULAR & CELLULAR PROTEOMICS			English	Article							CARDIAC TROPONIN-I; POSTTRANSLATIONAL MODIFICATIONS; DILATED CARDIOMYOPATHY; PHOSPHORYLATION; IDENTIFICATION; INTEGRATION; PREVALENCE; MUTATIONS; PROTEINS; NETWORK	Post-translational modifications (PTMs) regulate protein behavior through modulation of protein-protein interactions, enzymatic activity, and protein stability essential in the translation of genotype to phenotype in eukaryotes. Currently, less than 4% of all eukaryotic PTMs are reported to have biological function - a statistic that continues to decrease with an increasing rate of PTM detection.…	Georgia Tech; GaTech BINF GRA; [R01-GM117400]; [R00-GM094533]	This work was supported by Georgia Tech startup funding to M.T., as well as R01-GM117400 to M.T., R00-GM094533 to M.T., and GaTech BINF GRA funding to N.S.	Arkowitz RA, 2009, CSH PERSPECT BIOL, V1, DOI 10.1101/cshperspect.a001958; Asimaki A, 2007, AM J HUM GENET, V81, P964, DOI 10.1086/521633; Bandyopadhyay PK, 2008, VITAM HORM, V78, P157, DOI 10.1016/S0083-6729(07)00008-8; Beltrao P, 2012, CELL, V150, P413, DOI 10.1016/j.cell.2012.05.036; Berman HM, 2000, NUCLEIC ACIDS RES, V28, P235, DOI 10.1093/nar/28.1.235; BURNETT G, 1954, J BIOL CHEM, V211, P9…	47	3	3	1	6	AMER SOC BIOCHEMISTRY MOLECULAR BIOLOGY INC	BETHESDA	9650 ROCKVILLE PIKE, BETHESDA, MD 20814-3996 USA	1535-9476	1535-9484		MOL CELL PROTEOMICS	Mol. Cell. Proteomics	NOV	2016	15	11					3513	3528		10.1074/mcp.M116.062331
J	Chen, YF; Black, DS; Reilly, PJ				Chen, Yingfei; Black, Daniel S.; Reilly, Peter J.			Carboxylic ester hydrolases: Classification and database derived from their primary, secondary, and tertiary structures	PROTEIN SCIENCE			English	Review						carboxylesterases; cholinesterases; cocaine esterases; cutinases; lysopholipases; phospholipases; triacylglycerol lipases	PROTEINS DATABASE; ACTIVE ENZYMES; FOLD; SEQUENCES; ESTHER; UPDATE	We classified the carboxylic ester hydrolases (CEHs) into families and clans by use of multiple sequence alignments, secondary structure analysis, and tertiary structure superpositions. Our work for the first time has fully established their systematic structural classification. Family members have similar primary, secondary, and tertiary structures, and their active sites and reaction mechanisms…			Altschul SF, 1997, NUCLEIC ACIDS RES, V25, P3389, DOI 10.1093/nar/25.17.3389; Bateman A, 2015, NUCLEIC ACIDS RES, V43, pD204, DOI 10.1093/nar/gku989; Benson DA, 2013, NUCLEIC ACIDS RES, V41, pD36, DOI 10.1093/nar/gks1195; Berman HM, 2000, NUCLEIC ACIDS RES, V28, P235, DOI 10.1093/nar/28.1.235; Cantu DC, 2011, NUCLEIC ACIDS RES, V39, pD342, DOI 10.1093/nar/gkq1072; Cantu DC, 2010, PROTEIN SCI, V19…	26	1	1	3	8	WILEY-BLACKWELL	HOBOKEN	111 RIVER ST, HOBOKEN 07030-5774, NJ USA	0961-8368	1469-896X		PROTEIN SCI	Protein Sci.	NOV	2016	25	11					1942	1953		10.1002/pro.3016
J	Hu, J; Han, K; Li, Y; Yang, JY; Shen, HB; Yu, DJ				Hu, Jun; Han, Ke; Li, Yang; Yang, Jing-Yu; Shen, Hong-Bin; Yu, Dong-Jun			TargetCrys: protein crystallization prediction by fusing multi-view features with two-layered SVM	AMINO ACIDS			English	Article						Protein crystallization prediction; Multi-view; feature fusion; Support vector machine; Machine learning	AMINO-ACID-COMPOSITION; ATP-BINDING RESIDUES; SEQUENCE-BASED PREDICTION; PROPENSITY PREDICTION; STRUCTURAL GENOMICS; WEB SERVER; INFORMATION REDUNDANCY; SCREENING EFFICIENCY; ISOELECTRIC POINT; MEMBRANE-PROTEINS	The accurate prediction of whether a protein will crystallize plays a crucial role in improving the success rate of protein crystallization projects. A common critical problem in the development of machine-learning-based protein crystallization predictors is how to effectively utilize protein features extracted from different views. In this study, we aimed to improve the efficiency of fusing mult…	National Natural Science Foundation of China [61373062, 61175024, 61222306, 61233011]; Natural Science Foundation of Jiangsu [BK20141403]; Jiangsu University Graduate Research and Innovation Project [KYZZ_0123]; Jiangsu Postdoctoral Science Foundation [1201027C]; Science and Technology Commission of Shanghai Municipality [16JC1404300]; "The Six Top Talents" of Jiangsu Province [2013-XXRJ-022]; Fu…	This work was supported by the National Natural Science Foundation of China (No. 61373062, 61175024, 61222306, and 61233011), the Natural Science Foundation of Jiangsu (No. BK20141403), the Jiangsu University Graduate Research and Innovation Project (No. KYZZ_0123), Jiangsu Postdoctoral Science Foundation (No. 1201027C), the Science and Technology Commission of Shanghai Municipality (No. 16JC1404…	Babnigg Gyoergy, 2010, Journal of Structural and Functional Genomics, V11, P71, DOI 10.1007/s10969-010-9080-0; Berman HM, 2000, NUCLEIC ACIDS RES, V28, P235, DOI 10.1093/nar/28.1.235; Bradshaw NJ, 2012, SCHIZOPHR RES, V136, pS74; Charoenkwan P, 2013, PLOS ONE, V8, DOI 10.1371/journal.pone.0072368; Chauhan JS, 2009, BMC BIOINFORMATICS, V10, DOI 10.1186/1471-2105-10-434; Chen C, 2008, J THEOR BIOL,…	57	4	4	2	7	SPRINGER WIEN	WIEN	SACHSENPLATZ 4-6, PO BOX 89, A-1201 WIEN, AUSTRIA	0939-4451	1438-2199		AMINO ACIDS	Amino Acids	NOV	2016	48	11					2533	2547		10.1007/s00726-016-2274-4
J	Jedryczka, M; Sadys, M; Gilski, M; Grinn-Gofron, A; Kaczmarek, J; Strzelczak, A; Kennedy, R				Jedryczka, Malgorzata; Sadys, Magdalena; Gilski, Miroslaw; Grinn-Gofron, Agnieszka; Kaczmarek, Joanna; Strzelczak, Agnieszka; Kennedy, Roy			Contribution of Leptosphaeria species ascospores to autumn asthma in areas of oilseed rape production	ANNALS OF ALLERGY ASTHMA & IMMUNOLOGY			English	Article							STEM CANKER; FUNGAL SPORES; METEOROLOGICAL FACTORS; BRASSICA-NAPUS; AIR-POLLUTION; L.-BIGLOBOSA; MACULANS; POLAND; ALTERNARIA; ALLERGENS	Background: An increase in the number of hospital admissions from September to November in the northern hemisphere has been frequently reported. At this time, some species of fungal genus Leptosphaeria produce numerous ascospores, which are easily airborne. However, we lack knowledge about whether Leptosphaeria produces allergenic proteins. Objective: To evaluate the potential of Leptosphaeria as…			Aalberse RC, 2000, J ALLERGY CLIN IMMUN, V106, P228, DOI 10.1067/mai.2000.108434; Altschul SF, 1997, NUCLEIC ACIDS RES, V25, P3389, DOI 10.1093/nar/25.17.3389; Atkinson RW, 2006, OCCUP ENVIRON MED, V63, P580, DOI 10.1136/oem.2005.024448; Attard A, 2002, MOL PLANT MICROBE IN, V15, P672, DOI 10.1094/MPMI.2002.15.7.672; Berman HM, 2000, NUCLEIC ACIDS RES, V28, P235, DOI 10.1093/nar/28.1.235; Bielory…	60	0	0	3	13	ELSEVIER SCIENCE INC	NEW YORK	360 PARK AVE SOUTH, NEW YORK, NY 10010-1710 USA	1081-1206	1534-4436		ANN ALLERG ASTHMA IM	Ann. Allergy Asthma Immunol.	NOV	2016	117	5					495	+		10.1016/j.anai.2016.08.027
J	Cheng, X; Guinn, EJ; Buechel, E; Wong, R; Sengupta, R; Shkel, IA; Record, MT				Cheng, Xian; Guinn, Emily J.; Buechel, Evan; Wong, Rachel; Sengupta, Rituparna; Shkel, Irina A.; Record, M. Thomas, Jr.			Basis of Protein Stabilization by K Glutamate: Unfavorable Interactions with Carbon, Oxygen Groups	BIOPHYSICAL JOURNAL			English	Article							ESCHERICHIA-COLI K-12; DNA HELIX FORMATION; OSMOTIC-STRESS; GLYCINE BETAINE; POTASSIUM GLUTAMATE; IN-VIVO; PREFERENTIAL INTERACTIONS; POLYETHYLENE-GLYCOLS; FUNCTIONAL-GROUPS; SURFACE-AREA	Potassium glutamate (KGlu) is the primary Escherichia coli cytoplasmic salt. After sudden osmotic upshift, cytoplasmic KGlu concentration increases, initially because of water efflux and subsequently by K+ transport and Glu(-) synthesis, allowing water uptake and resumption of growth at high osmolality. In vitro, KGlu ranks with Hofmeister salts KF and K2SO4 in driving protein folding and assembl…	National Institutes of Health [GM047022]; University of Wisconsin-Madison	Support from National Institutes of Health grant No. GM047022 (to M.T.R.) and the University of Wisconsin-Madison is gratefully acknowledged.	ARAKAWA T, 1984, J BIOL CHEM, V259, P4979; ARAKAWA T, 1985, BIOPHYS J, V47, P411; Auton M, 2011, BIOPHYS CHEM, V159, P90, DOI 10.1016/j.bpc.2011.05.012; BERG OG, 1990, BIOPOLYMERS, V30, P1027, DOI 10.1002/bip.360301104; Berman HM, 2000, NUCLEIC ACIDS RES, V28, P235, DOI 10.1093/nar/28.1.235; Bujacz A, 2012, ACTA CRYSTALLOGR D, V68, P1278, DOI 10.1107/S0907444912027047; Capp MW, 2009, BIOCHEMISTRY…	63	4	4	4	10	CELL PRESS	CAMBRIDGE	50 HAMPSHIRE ST, FLOOR 5, CAMBRIDGE, MA 02139 USA	0006-3495	1542-0086		BIOPHYS J	Biophys. J.	2018-11-01	2016	111	9					1854	1865		10.1016/j.bpj.2016.08.050
J	Hernandez-Flores, A; Almaraz-Barrera, MD; Lozano-Amado, D; Correa-Basurto, J; Rojo-Dominguez, A; Luna-Rivera, E; Schnoor, M; Guillen, N; Hernandez-Rivas, R; Vargas, M				Hernandez-Flores, Araceli; de Jesus Almaraz-Barrera, Ma; Lozano-Amado, Daniela; Correa-Basurto, Jose; Rojo-Dominguez, Arturo; Luna-Rivera, Eva; Schnoor, Michael; Guillen, Nancy; Hernandez-Rivas, Rosaura; Vargas, Miguel			A new nucleocytoplasmic RhoGAP protein contributes to control the pathogenicity of Entamoeba histolytica by regulating EhRacC and EhRacD activity	CELLULAR MICROBIOLOGY			English	Article							GTPASE-ACTIVATING PROTEIN; MOLECULAR-DYNAMICS; PROTEOMIC ANALYSIS; DOMAIN; PHAGOCYTOSIS; CHEMOTAXIS; HOMOLOGY; BINDING; FAMILY; GENES	Small GTPases are signalling molecules that regulate important cellular processes. GTPases are deactivated by GTPase-activating proteins (GAPs). While human GAPs have been intensively studied, no GAP has yet been characterized in Entamoeba histolytica. In this study, we identified and characterized a novel nucleocytoplasmic RhoGAP in E.histolytica termed EhRhoGAPnc. In silico analyses of the doma…	CONACyT Mexico [ANR-CONACyT 140364, CONACYT 153334]	This work was supported by CONACyT Mexico (Grant ANR-CONACyT 140364 and CONACYT 153334).	Aguilar-Rojas A, 2005, EXP PARASITOL, V109, P150, DOI 10.1016/j.exppara.2004.12.013; AHMED S, 1994, J BIOL CHEM, V269, P17642; Arias-Romero LE, 2007, CELL MOTIL CYTOSKEL, V64, P390, DOI 10.1002/cm.20191; Barrett T, 1997, NATURE, V385, P458, DOI 10.1038/385458a0; Batcho PF, 2000, PHYS REV E, V61, P7169, DOI 10.1103/PhysRevE.61.7169; Benson DA, 2013, NUCLEIC ACIDS RES, V41, pD36, DOI 10.1093/nar/gk…	60	0	0	1	3	WILEY-BLACKWELL	HOBOKEN	111 RIVER ST, HOBOKEN 07030-5774, NJ USA	1462-5814	1462-5822		CELL MICROBIOL	Cell Microbiol.	NOV	2016	18	11					1653	1672		10.1111/cmi.12603
J	Afiqah, RN; Paital, B; Kumar, S; Majeed, ABA; Tripathy, M				Afiqah, Radin Nur; Paital, Biswaranjan; Kumar, Sunil; Majeed, Abu Bakar Abdul; Tripathy, Minaketan			AgNO3 dependant modulation of glucose mediated respiration kinetics in Escherichia coli at different pH and temperature	JOURNAL OF MOLECULAR RECOGNITION			English	Article						silver nitrate; E. coli; respiration; respiratory enzymes	SILVER NANOPARTICLES; ANTIBACTERIAL ACTION; MECHANISM; NITRATE; GROWTH; IONS; VALIDATION; CATABOLISM; PLASMA; RATES	The inhibitory role of AgNO3 on glucose-mediated respiration in Escherichia coli has been investigated as a function of pH and temperature using Clark-type electrode, environmental scanning electron microscopy, and computational tools. In the given concentration of bacterial suspension (1x10(8)CFU/ml), E.coli showed an increasing nonlinear trend of tetra-phasic respiration between 1-133M glucose …	UiTM; Ministry of Education (MOE) Malaysia [55/2013]	R. N. A. is highly thankful to UiTM, and Ministry of Education (MOE) Malaysia, for financial support through Fundamental Research Grant Scheme 600-RMI/FRGS 5/3 (55/2013).	ALTSCHUL SF, 1990, J MOL BIOL, V215, P403, DOI 10.1006/jmbi.1990.9999; Amir MC, 2012, REV BIOL TROP IN J T, V60, P1567; ANDERSEN KB, 1980, J BACTERIOL, V144, P114; Balogh L, 2001, NANO LETT, V1, P18, DOI 10.1021/nl005502p; Berman HM, 2000, NUCLEIC ACIDS RES, V28, P235, DOI 10.1093/nar/28.1.235; Chen Xin-xin, 2009, Zoological Research, V30, P171, DOI 10.3724/SP.J.1141.2009.02171; Colman BP, 2012, …	46	0	0	1	4	WILEY	HOBOKEN	111 RIVER ST, HOBOKEN 07030-5774, NJ USA	0952-3499	1099-1352		J MOL RECOGNIT	J. Mol. Recognit.	NOV	2016	29	11					544	554		10.1002/jmr.2554
J	Agostino, M; Mancera, RL; Ramsland, PA; Fernandez-Recio, J				Agostino, Mark; Mancera, Ricardo L.; Ramsland, Paul A.; Fernandez-Recio, Juan			Optimization of protein-protein docking for predicting Fc-protein interactions	JOURNAL OF MOLECULAR RECOGNITION			English	Article						fragment crystallizable; immune response; infectious disease; structural bioinformatics; structure-based design; structural immunology	HUMAN-IMMUNOGLOBULIN G; IGA-BINDING PEPTIDE; HUMAN IGG1 FC; CRYSTAL-STRUCTURE; STRUCTURAL BASIS; ALPHA/MU RECEPTOR; LIGAND-BINDING; NORMAL-MODES; AFFINITY-CHROMATOGRAPHY; CONFORMATIONAL-CHANGES	The antibody crystallizable fragment (Fc) is recognized by effector proteins as part of the immune system. Pathogens produce proteins that bind Fc in order to subvert or evade the immune response. The structural characterization of the determinants of Fc-protein association is essential to improve our understanding of the immune system at the molecular level and to develop new therapeutic agents.…	Spanish Government [BIO2013-48213-R]; NHMRC Early Career Fellowship [GNT1054245]; Australian Government through the Victorian Life Sciences Computational Initiative under the National Computational Merit Allocation Scheme [dq3]	This work was supported by grant number BIO2013-48213-R from Spanish Government. M.A. is a recipient of an NHMRC Early Career Fellowship (GNT1054245). We acknowledge the computational resources provided by the Australian Government through the Victorian Life Sciences Computational Initiative under the National Computational Merit Allocation Scheme (project dq3). The authors gratefully acknowledge…	Berman HM, 2000, NUCLEIC ACIDS RES, V28, P235, DOI 10.1093/nar/28.1.235; Bidgood SR, 2014, P NATL ACAD SCI USA, V111, P13463, DOI 10.1073/pnas.1410980111; Carrington BJ, 2004, J MOL GRAPH MODEL, V23, P167, DOI 10.1016/j.jmgm.2004.05.003; Chelliah V, 2006, J MOL BIOL, V357, P1669, DOI 10.1016/j.jmb.2006.01.001; Chen K, 2011, CURR OPIN IMMUNOL, V23, P345, DOI 10.1016/j.coi.2011.01.006; Chen R, 2003…	81	0	0	2	6	WILEY-BLACKWELL	HOBOKEN	111 RIVER ST, HOBOKEN 07030-5774, NJ USA	0952-3499	1099-1352		J MOL RECOGNIT	J. Mol. Recognit.	NOV	2016	29	11					555	568		10.1002/jmr.2555
J	Sartorelli, J; de Castro, AA; Ramalho, TC; Giacoppo, JOS; Mancini, DT; Caetano, MS; da Cunha, EFF				Sartorelli, Jaqueline; de Castro, Alexandre A.; Ramalho, Teodorico C.; Giacoppo, Juliana O. S.; Mancini, Daiana T.; Caetano, Melissa S.; da Cunha, Elaine F. F.			Asymmetric biocatalysis of the nerve agent VX by human serum paraoxonase 1: molecular docking and reaction mechanism calculations	MEDICINAL CHEMISTRY RESEARCH			English	Article						Molecular; docking; HuPON1; VX; QM/MM; Mutation; Homology modeling	MYCOBACTERIUM-TUBERCULOSIS; HUMAN ACETYLCHOLINESTERASE; PROTEIN; REACTIVATION; HYDROLYSIS; TOXICITY; BINDING; PHOSPHOTRIESTERASE; ATHEROSCLEROSIS; ALIGNMENT	Organophosphorus compounds have been employed in agricultural activity for a long time, causing serious public health problems. Due to their toxic properties, these compounds have also been used as chemical weapons. In view of this scenario, the catalytic degradation and the development of bioremediation processes of organophosphorus compounds have been of wide interest. Among several enzymes cap…	Conselho Nacional de Desenvolvimento Cientifico e Tecnologico (CNPq); Fundacao de Amparo ao Ensino e Pesquisa de Minas Gerais (FAPEMIG); Coordenacao de Aperfeicoamento de Pessoal de Nivel Superior/Ministerio da Defesa (CAPES/MD); Federal University of Lavras (UFLA); Excellence project FIM UHK	The authors wish to thank the Brazilian financial agencies Conselho Nacional de Desenvolvimento Cientifico e Tecnologico (CNPq), Fundacao de Amparo ao Ensino e Pesquisa de Minas Gerais (FAPEMIG) and Coordenacao de Aperfeicoamento de Pessoal de Nivel Superior/Ministerio da Defesa (CAPES/MD) for financial support, and the Federal University of Lavras (UFLA) for providing the physical infrastructure…	Aharoni A, 2005, NAT GENET, V37, P73, DOI 10.1038/ng1482; Ahmed Z, 2002, BIOCHEM BIOPH RES CO, V290, P391, DOI 10.1006/bbrc.2001.6150; Altschul SF, 1997, NUCLEIC ACIDS RES, V25, P3389, DOI 10.1093/nar/25.17.3389; ALTSCHUL SF, 1990, J MOL BIOL, V215, P403, DOI 10.1006/jmbi.1990.9999; Aubert SD, 2004, BIOCHEMISTRY-US, V43, P5707, DOI 10.1021/bi0497805; Ben-David M, 2012, J MOL BIOL, V418, P181, DOI…	64	0	0	6	20	SPRINGER BIRKHAUSER	NEW YORK	233 SPRING STREET, 6TH FLOOR, NEW YORK, NY 10013 USA	1054-2523	1554-8120		MED CHEM RES	Med. Chem. Res.	NOV	2016	25	11					2521	2533		10.1007/s00044-016-1704-x
J	Sen, S; Kundu, S; Dutta, SK				Sen, Saswati; Kundu, Sangeeta; Dutta, Samir Kr.			Proteomic analysis of JAZ interacting proteins under methyl jasmonate treatment in finger millet	PLANT PHYSIOLOGY AND BIOCHEMISTRY			English	Article						Finger millet; In-silico modeling; Jasmonate ZIM domain protein; JAZ; JAZ-interacting proteins; JA co-receptor complex; Proteomics analysis	TRANSCRIPTION FACTORS; SIGNAL-TRANSDUCTION; STAMEN DEVELOPMENT; DEFENSE RESPONSES; ARABIDOPSIS; ACID; RICE; BINDING; PERCEPTION; REPRESSION	Jasmonic acid (JA) signaling pathway in plants is activated against various developmental processes as well as biotic and abiotic stresses. The Jasmonate ZIM-domain (JAZ) protein family, the key regulator of plant JA signaling pathway, also participates in phytohormone crosstalk. This is the first study revealing the in vivo interactions of finger millet (Eleusine coracana (L) Gaertn.) JAZ protei…	WOS-A scheme of Department of Science and Technology, Government of India [SR/WOS-A/LS-431/2011(G)]; SERB Young Scientist Grant [SB/YS/LS-65/2013]	This study is supported by WOS-A scheme of Department of Science and Technology, Government of India (Grant No. SR/WOS-A/LS-431/2011(G)). The authors are thankful to the Director, CSIR-IICB for kindly allowing us to carry out this work. The authors are also thankful to Mr. S. Chakraborty of CSIR-IICB for MALDI-TOF-TOF operation. SK acknowledges SERB Young Scientist Grant (SB/YS/LS-65/2013) for co…	Berman HM, 2000, NUCLEIC ACIDS RES, V28, P235, DOI 10.1093/nar/28.1.235; Bu QY, 2008, CELL RES, V18, P756, DOI 10.1038/cr.2008.53; Chico JM, 2014, PLANT CELL, V26, P1967, DOI 10.1105/tpc.114.125047; Chini A, 2009, PLANT J, V59, P77, DOI 10.1111/j.1365-313X.2009.03852.x; Chung HS, 2009, PLANT CELL, V21, P131, DOI 10.1105/tpc.108.064097; Deng HQ, 2012, PLANT PHYSIOL, V158, P876, DOI 10.1104/pp.111.…	41	1	1	4	19	ELSEVIER FRANCE-EDITIONS SCIENTIFIQUES MEDICALES ELSEVIER	PARIS	23 RUE LINOIS, 75724 PARIS, FRANCE	0981-9428			PLANT PHYSIOL BIOCH	Plant Physiol. Biochem.	NOV	2016	108						79	89		10.1016/j.plaphy.2016.05.033
J	Bhatnagar, A; Apostol, MI; Bandyopadhyay, D				Bhatnagar, Akshay; Apostol, Marcin I.; Bandyopadhyay, Debashree			Amino acid function relates to its embedded protein microenvironment: A study on disulfide-bridged cystine	PROTEINS-STRUCTURE FUNCTION AND BIOINFORMATICS			English	Article						amino acid function; embedded protein microenvironment; disulphide bridged cystine; half-cystine; redox active cystine; enzyme class; enzyme active site; protein microenvironment cluster; protein dielectric medium; sequence conservation	SIDE-CHAINS; EVOLUTIONARY CONSERVATION; SECONDARY-STRUCTURE; ALIGNMENT; SEQUENCES; RESIDUES; BILAYERS; DATABASE; FAMILY; SITES	In our previous study, we have shown that the microenvironments around conserved amino acids are also conserved in protein families (Bandyopadhyay and Mehler, Proteins 2008; 72:646-659). In this study, we have hypothesized that amino acids perform similar functions when embedded in a certain type of protein microenvironment. We have tested this hypothesis on the microenvironments around disulfide…	University Grants Commission; Basic Research Start-up grant, India; BITS-PILANI	Grant sponsor: University Grants Commission; Basic Research Start-up grant, India; BITS-PILANI, research initiation Grant.	Andreeva A, 2008, NUCLEIC ACIDS RES, V36, pD419, DOI 10.1093/nar/gkm993; Ashkenazy H, 2010, NUCLEIC ACIDS RES, V38, pW529, DOI 10.1093/nar/gkq399; Bairoch A, 2000, NUCLEIC ACIDS RES, V28, P304, DOI 10.1093/nar/28.1.304; Bandyopadhyay D, 2008, PROTEINS, V72, P646, DOI 10.1002/prot.21958; Berman HM, 2000, NUCLEIC ACIDS RES, V28, P235, DOI 10.1093/nar/28.1.235; Braberg H, 2012, BIOINFORMATICS, V28, …	43	0	0	2	3	WILEY-BLACKWELL	HOBOKEN	111 RIVER ST, HOBOKEN 07030-5774, NJ USA	0887-3585	1097-0134		PROTEINS	Proteins	NOV	2016	84	11					1576	1589		10.1002/prot.25101
J	Bernhofer, M; Kloppmann, E; Reeb, J; Rost, B				Bernhofer, Michael; Kloppmann, Edda; Reeb, Jonas; Rost, Burkhard			TMSEG: Novel prediction of transmembrane helices	PROTEINS-STRUCTURE FUNCTION AND BIOINFORMATICS			English	Article						membrane protein; protein structure prediction; transmembrane helices; -helical integral membrane protein; transmembrane protein prediction; transmembrane helix prediction	PROTEIN STRUCTURE DETERMINATION; MEMBRANE-PROTEINS; DATA-BANK; TOPOLOGY; ACCURACY; DATABASE; INFORMATION; GENERATION; PROTEOMES; RESIDUES	Transmembrane proteins (TMPs) are important drug targets because they are essential for signaling, regulation, and transport. Despite important breakthroughs, experimental structure determination remains challenging for TMPs. Various methods have bridged the gap by predicting transmembrane helices (TMHs), but room for improvement remains. Here, we present TMSEG, a novel method identifying TMPs an…	Alexander von Humboldt Foundation; National Institutes of Health (NIH) [U54 GM095315]	Grant sponsor: Alexander von Humboldt Foundation; Grant sponsor: National Institutes of Health (NIH); Grant number: U54 GM095315.	Altschul SF, 1997, NUCLEIC ACIDS RES, V25, P3389, DOI 10.1093/nar/25.17.3389; Berman HM, 2000, NUCLEIC ACIDS RES, V28, P235, DOI 10.1093/nar/28.1.235; Bigelow HR, 2004, NUCLEIC ACIDS RES, V32, P2566, DOI 10.1093/nar/gkh580; Caffrey M, 2015, ACTA CRYSTALLOGR F, V71, P3, DOI 10.1107/S2053230X14026843; Chen CP, 2002, PROTEIN SCI, V11, P2774, DOI 10.1110/ps.0214502; Efron B., 1993, INTRO BOOTSTRAP; E…	45	1	1	2	10	WILEY-BLACKWELL	HOBOKEN	111 RIVER ST, HOBOKEN 07030-5774, NJ USA	0887-3585	1097-0134		PROTEINS	Proteins	NOV	2016	84	11					1706	1716		10.1002/prot.25155
J	Ivanov, SM; Huber, RG; Warwicker, J; Bond, PJ				Ivanov, Stefan M.; Huber, Roland G.; Warwicker, Jim; Bond, Peter J.			Energetics and Dynamics Across the Bcl-2-Regulated Apoptotic Pathway Reveal Distinct Evolutionary Determinants of Specificity and Affinity	STRUCTURE			English	Article							PROTEIN-PROTEIN INTERACTIONS; BCL-X-L; FREE-ENERGY CALCULATIONS; BIM BH3 DOMAIN; BH3-ONLY PROTEINS; CRYSTAL-STRUCTURE; CONFORMATIONAL ENTROPY; GENE DUPLICATION; PEPTIDE BINDING; CELL-SURVIVAL	Critical regulatory pathways are replete with instances of intra-and interfamily protein-protein interactions due to the pervasiveness of gene duplication throughout evolution. Discerning the specificity determinants within these systems has proven a challenging task. Here, we present an energetic analysis of the specificity determinants within the Bcl-2 family of proteins (key regulators of the …	A*STAR Graduate Academy (A*GA) Singapore	We thank the A*STAR Graduate Academy (A*GA) Singapore for funding, and Stephen Fox and Chandra Verma for helpful discussions.	Aiello D, 2012, J MOL BIOL, V423, P257, DOI 10.1016/j.jmb.2012.06.039; Arkhipov A, 2014, PLOS COMPUT BIOL, V10, DOI 10.1371/journal.pcbi.1003742; Berggard T, 2007, PROTEOMICS, V7, P2833, DOI 10.1002/pmic.200700131; Berglund NA, 2015, PROG BIOPHYS MOL BIO, V119, P72, DOI 10.1016/j.pbiomolbio.2015.06.021; Berman HM, 2000, NUCLEIC ACIDS RES, V28, P235, DOI 10.1093/nar/28.1.235; Boersma MD, 2008, PRO…	68	1	1	0	4	CELL PRESS	CAMBRIDGE	600 TECHNOLOGY SQUARE, 5TH FLOOR, CAMBRIDGE, MA 02139 USA	0969-2126	1878-4186		STRUCTURE	Structure	2018-11-01	2016	24	11					2024	2033		10.1016/j.str.2016.09.006
J	Wang, YZ; Patil, P; Domling, A				Wang, Yuanze; Patil, Pravin; Domling, Alexander			Easy Synthesis of Two Positional Isomeric Tetrazole Libraries	SYNTHESIS-STUTTGART			English	Article						1H-tetrazole; 5H-tetrazole; cyanoacetamide; isocyanoacetamide; [2+3] cycloaddition; Oliveri-Mandala and Alagna reaction; fragment-based drug discovery	5-SUBSTITUTED TETRAZOLES; SODIUM-AZIDE; NITRILES	A fast and efficient synthesis of libraries of positional isomeric 1H-tetrazoles and 5H-tetrazoles, for the purpose of testing binding hypothesis of isomeric tetrazoles in fragment-based drug discovery, is described.	NIH [1R01GM097082]; Innovative Medicines Initiative Joint Undertaking [115489]; European Union's Seventh Framework Programme (FP7); CSC	The research leading to these results has received support from the NIH (1R01GM097082) and from the Innovative Medicines Initiative Joint Undertaking under grant agreement no. 115489. These resources are composed of financial contribution from the European Union's Seventh Framework Programme (FP7/2007-2013) and EFPIA companies' in-kind contribution. Y.W. acknowledges a CSC stipendship.	Beck B., 2006, ACS COMB SCI, V8, P872; Berman HM, 2000, NUCLEIC ACIDS RES, V28, P235, DOI 10.1093/nar/28.1.235; Cantillo D, 2011, J AM CHEM SOC, V133, P4465, DOI 10.1021/ja109700b; Chen Y, 2009, NAT CHEM BIOL, V5, P358, DOI 10.1038/nchembio.155; Das B, 2010, SYNLETT, P391, DOI 10.1055/s-0029-1219150; FINNEGAN WG, 1958, J AM CHEM SOC, V80, P3908, DOI 10.1021/ja01548a028; Gawande SD, 2013, TETRAHED…	18	0	0	1	6	GEORG THIEME VERLAG KG	STUTTGART	RUDIGERSTR 14, D-70469 STUTTGART, GERMANY	0039-7881	1437-210X		SYNTHESIS-STUTTGART	Synthesis	NOV	2016	48	21					3701	3712		10.1055/s-0035-1562435
J	Kumar, R; Gupta, D				Kumar, Rakesh; Gupta, Dinesh			Identification of CYP1B1-specific candidate inhibitors using combination of in silico screening, integrated knowledge-based filtering, and molecular dynamics simulations	CHEMICAL BIOLOGY & DRUG DESIGN			English	Article						alpha-naphthoflavone; CYP1A1; CYP1A2; CYP1B1; heme; in silico screening; MD simulation	HUMAN CYTOCHROME-P450 1B1; CATALYTIC-ACTIVITY; POTENT INHIBITORS; CYP1B1 ACTIVITIES; P4501B1; SELECTIVITY; TARGET; DERIVATIVES; ENZYMES; BINDING	CYP1B1 is a promising drug target for developing novel drugs against hormonal cancers and hypertension. The development of CYP1B1-specific inhibitors is hindered mainly due to non-specific action of known CYP inhibitors. The active site of CYP1B1 is similar to other cytochromes with different substrate preferences rendering a scope to develop specific inhibitors. We have developed a novel in sili…	Department of Biotechnology, Government of India [BT/BI/25/066/2012]	This work was financially supported by Department of Biotechnology, Government of India BT/BI/25/066/2012 awarded to DG. RK is a recipient of the Senior Research Fellowship of the Department of Biotechnology, Government of India.	Ahmad N, 2004, J INVEST DERMATOL, V123, P417, DOI 10.1111/j.0022-202X.2004.23307.x; Berman HM, 2000, NUCLEIC ACIDS RES, V28, P235, DOI 10.1093/nar/28.1.235; Case DA, 2005, J COMPUT CHEM, V26, P1668, DOI 10.1002/jcc.20290; Case D. A., 2012, AMBER 12; Chan HY, 2002, BIOMED PHARMACOTHER, V56, P269, DOI 10.1016/S0753-3322(02)00192-0; Chen DL, 2007, PROTEINS, V67, P593, DOI 10.1002/prot.21249; Chun YJ…	47	2	2	1	4	WILEY	HOBOKEN	111 RIVER ST, HOBOKEN 07030-5774, NJ USA	1747-0277	1747-0285		CHEM BIOL DRUG DES	Chem. Biol. Drug Des.	NOV	2016	88	5					730	739		10.1111/cbdd.12803
J	Sojo, V; Dessimoz, C; Pomiankowski, A; Lane, N				Sojo, Victor; Dessimoz, Christophe; Pomiankowski, Andrew; Lane, Nick			Membrane Proteins Are Dramatically Less Conserved than Water-Soluble Proteins across the Tree of Life	MOLECULAR BIOLOGY AND EVOLUTION			English	Article						membrane proteins; orthologs; homeostasis; evolution; adaptation	HORIZONTAL GENE-TRANSFER; DATA-BANK; PLASMODIUM-FALCIPARUM; SIGNAL PEPTIDES; EVOLUTION; GENOME; MODEL; POLYMORPHISMS; CONSTRAINTS; SELECTION	Membrane proteins are crucial in transport, signaling, bioenergetics, catalysis, and as drug targets. Here, we show that membrane proteins have dramatically fewer detectable orthologs than water-soluble proteins, less than half in most species analyzed. This sparse distribution could reflect rapid divergence or gene loss. We find that both mechanisms operate. First, membrane proteins evolve faste…	Engineering and Physical Sciences Research Council (EPSRC) [EP/F500351/1, EP/I017909/1, EP/K038656/1]; European Molecular Biology Organization; Biotechnology and Biological Sciences Research Council (BBSRC) [BB/L018241/1]; Swiss National Science Foundation [150654]; Leverhulme Trust; UCL Research Frontiers Origins of Life Programme	The authors thank Adrian Altenhoff, Tom Richards, Kevin Gori, Steven Muller, and Konstantinos Angelis for their support and suggestions. This work was supported by the Engineering and Physical Sciences Research Council (EPSRC EP/F500351/1 to V.S. and A.P.; EP/I017909/1 and EP/K038656/1 to A.P.), UCL-CoMPLEX (to V.S.), the European Molecular Biology Organization (to V.S.), the Biotechnology and Bi…	Akanni WA, 2015, PHILOS T R SOC B, V370, DOI 10.1098/rstb.2014.0337; Altenhoff AM, 2015, NUCLEIC ACIDS RES, V43, pD240, DOI 10.1093/nar/gku1158; ALTSCHUL SF, 1990, J MOL BIOL, V215, P403, DOI 10.1006/jmbi.1990.9999; Berman HM, 2000, NUCLEIC ACIDS RES, V28, P235, DOI 10.1093/nar/28.1.235; Boothby TC, 2015, P NATL ACAD SCI USA, V112, P15976, DOI 10.1073/pnas.1510461112; Cock PJA, 2009, BIOINFORMATI…	43	2	2	1	12	OXFORD UNIV PRESS	OXFORD	GREAT CLARENDON ST, OXFORD OX2 6DP, ENGLAND	0737-4038	1537-1719		MOL BIOL EVOL	Mol. Biol. Evol.	NOV	2016	33	11					2874	2884		10.1093/molbev/msw164
J	Spielman, SJ; Wilke, CO				Spielman, Stephanie J.; Wilke, Claus O.			Extensively Parameterized Mutation-Selection Models Reliably Capture Site-Specific Selective Constraint	MOLECULAR BIOLOGY AND EVOLUTION			English	Article						mutation-selection models; selection coefficients; protein evolution; dN/dS; sequence simulation; molecular evolution	IMPROVES PHYLOGENETIC FIT; PROTEIN EVOLUTION; COEFFICIENTS; SUBSTITUTION; HOMOLOGS	The mutation-selection model of coding sequence evolution has received renewed attention for its use in estimating site-specific amino acid propensities and selection coefficient distributions. Two computationally tractable mutation-selection inference frameworks have been introduced: One framework employs a fixed-effects, highly parameterized maximum likelihood approach, whereas the other employ…	NIH [F31 GM113622-01, R01 GM088344]; ARO [W911NF-12-1-0390]; NSF Cooperative [DBI-0939454]; BEACON Center; niversity of Texas at Austin's Center for Computational Biology and Bioinformatics (CCBB)	This work was supported in part by NIH grant F31 GM113622-01 to S.J.S., NIH grant R01 GM088344 to C.O.W., ARO grant W911NF-12-1-0390 to C.O.W., and NSF Cooperative Agreement No. DBI-0939454 (BEACON Center) to C.O.W. Computational resources were provided by the University of Texas at Austin's Center for Computational Biology and Bioinformatics (CCBB).	Abriata LA, 2015, PLOS ONE, V10, DOI 10.1371/journal.pone.0118684; Ashenberg O, 2013, P NATL ACAD SCI USA, V110, P21071, DOI 10.1073/pnas.1314781111; Berman HM, 2000, NUCLEIC ACIDS RES, V28, P235, DOI 10.1093/nar/28.1.235; Bloom JD, 2016, BIORXIV, DOI DOI 10.1101/037689; Bloom JD, 2014, MOL BIOL EVOL, V31, P2753, DOI 10.1093/molbev/msu220; Bloom JD, 2014, MOL BIOL EVOL, V31, P1956, DOI 10.1093/mo…	37	1	1	2	6	OXFORD UNIV PRESS	OXFORD	GREAT CLARENDON ST, OXFORD OX2 6DP, ENGLAND	0737-4038	1537-1719		MOL BIOL EVOL	Mol. Biol. Evol.	NOV	2016	33	11					2990	3001		10.1093/molbev/msw171
J	Ong, SS; Bhassu, S; Bin Kwong, Q; Mather, P; Simarani, K; Othman, RY				Ong, Shen-Shaun; Bhassu, Subha; Bin Kwong, Qi; Mather, Peter; Simarani, Khanom; Othman, Rofina Yasmin			Identification of a putative cellulase gene in the giant freshwater prawn, Macrobrachium rosenbergii (De Man, 1879)	AQUACULTURE RESEARCH			English	Article						cellulase; cellulose; endoglucanase; Macrobrachium; cellulose digestion	I-TASSER; CHERAX-QUADRICARINATUS; PROTEIN-STRUCTURE; ALIGNMENT; TERMITE; EXPRESSION; PREDICTION; DIGESTION; CRAYFISH; ORIGIN	Nutrition plays an important role in the development of all organisms and in particular that of farmed aquatic species where costs associated with feed can often exceed 60% of total production costs. Crustacean species in addition, have the added metabolic requirement for regular moulting to allow normal growth and this requires large amounts of energy in the form of sugars (glucose). The current…	University of Malaya [PS469/2010B, FP055/2008C]; MOHE [H23001-G000006]; MOSTI ABI [53-02-03-1030]	This work was supported by the Postgraduate Research Grant (PPP) PS469/2010B, and the Fundamental Research Grant Scheme (FRGS) FP055/2008C of the University of Malaya, Grant H23001-G000006 of MOHE and also MOSTI ABI funding: 53-02-03-1030. The authors are grateful to Miss Tian Tian Tan and Miss Nurul Hidayah for technical advice. We thank the farmers of the aquaculture farms for providing the spe…	Berman HM, 2000, NUCLEIC ACIDS RES, V28, P235, DOI 10.1093/nar/28.1.235; Byrne KA, 1999, GENE, V239, P317, DOI 10.1016/S0378-1119(99)00396-0; Chan T. Y., 1998, FAO SPECIES IDENTIFI, V2, P851; CLEVELAND LR, 1924, BIOL BULL, V46, P117; Crawford AC, 2004, GENE, V340, P267, DOI 10.1016/j.gene.2004.06.060; de Castro E, 2006, NUCLEIC ACIDS RES, V34, pW362, DOI 10.1093/nar/gkl124; FAO Fact Sheets, 2012,…	44	1	1	1	11	WILEY-BLACKWELL	HOBOKEN	111 RIVER ST, HOBOKEN 07030-5774, NJ USA	1355-557X	1365-2109		AQUAC RES	Aquac. Res.	NOV	2016	47	11					3653	3661		10.1111/are.12818
J	Shelar, A; Bansal, M				Shelar, Ashish; Bansal, Manju			Helix perturbations in membrane proteins assist in inter-helical interactions and optimal helix positioning in the bilayer	BIOCHIMICA ET BIOPHYSICA ACTA-BIOMEMBRANES			English	Article						Helix kink; pi-Helix; 3(10)-Helix; Hydrophobic mismatch; Membrane protein modelling; Helix design	TRANSMEMBRANE ALPHA-HELICES; CYTOCHROME-C-OXIDASE; HYDROPHOBIC MISMATCH; COUPLED RECEPTORS; CRYSTAL-STRUCTURE; STRUCTURAL BASIS; PROLINE KINKS; WEB SERVER; PACKING; GEOMETRY	Transmembrane (TM) helices in integral membrane proteins are primarily alpha-helical in structure. Here we analyze 1134 TM helices in 90 high resolution membrane proteins and find that apart from the widely prevalent alpha-helices, TM regions also contain stretches of 3(10) (3 to 8 residues) and pi-helices (5 to 19 residues) with distinct sequence signatures. The various helix perturbations in TM…	IISc; J.C. Bose National Fellowship of Department of Science and Technology, Government of India	AS acknowledges IISc for a fellowship. AS acknowledges Anasuya Dighe for suggestions and critical reading of the manuscript. MB is a recipient of J.C. Bose National Fellowship of Department of Science and Technology, Government of India. MB acknowledges DBT-IISc partnership program.	Abramson J, 2000, NAT STRUCT BIOL, V7, P910; ALTSCHUL SF, 1990, J MOL BIOL, V215, P403, DOI 10.1006/jmbi.1990.9999; Andreeva A, 2008, NUCLEIC ACIDS RES, V36, pD419, DOI 10.1093/nar/gkm993; Arinaminpathy Y, 2009, DRUG DISCOV TODAY, V14, P1130, DOI 10.1016/j.drudis.2009.08.006; Aurora R, 1998, PROTEIN SCI, V7, P21; Baeza-Delgado C, 2016, SCI REP-UK, V6, DOI 10.1038/srep23397; Baeza-Delgado C, 2013,…	84	1	1	3	12	ELSEVIER SCIENCE BV	AMSTERDAM	PO BOX 211, 1000 AE AMSTERDAM, NETHERLANDS	0005-2736	0006-3002		BBA-BIOMEMBRANES	Biochim. Biophys. Acta-Biomembr.	NOV	2016	1858	11					2804	2817		10.1016/j.bbamem.2016.08.003
J	Altunoglu, YC; Baloglu, P; Yer, EN; Pekol, S; Baloglu, MC				Altunoglu, Yasemin Celik; Baloglu, Pinar; Yer, Esra Nurten; Pekol, Sefa; Baloglu, Mehmet Cengiz			Identification and expression analysis of LEA gene family members in cucumber genome	PLANT GROWTH REGULATION			English	Article						LEA gene family; Cucumis sativus; Genome-wide analysis; Gene expression analysis; Drought stress	EMBRYOGENESIS ABUNDANT PROTEINS; WIDE IDENTIFICATION; TRANSCRIPTION FACTORS; WATER-DEFICIT; HIGHER-PLANTS; ORYZA-SATIVA; IN-VITRO; ARABIDOPSIS; MICRORNAS; STRESS	LEA (late embryogenesis abundant) proteins are firstly discovered in seeds and then identified in vegetative tissues of different plant species. They are mainly regulated under abiotic stress conditions. Although genome wide studies of different gene family members have been performed in cucumber, there is no such a study for LEA genes. We have identified 79 LEA genes in the cucumber genome. Base…	Scientific and Technological Research Council of Turkey (TUBITAK) [114O761]	This work was financially supported by The Scientific and Technological Research Council of Turkey (TUBITAK) with grant number 114O761.	Ambros V, 2007, DEVELOPMENT, V134, P1635, DOI 10.1242/dev.002006; Jimenez JA, 2008, J PLANT PHYSIOL, V165, P1798, DOI 10.1016/j.jplph.2007.11.013; Arteaga-Vazquez M, 2006, PLANT CELL, V18, P3355, DOI 10.1105/tpc.106.044420; Bailey TL, 1994, P 2 INT C INT SYST M, P28; Baloglu MC, 2015, BIOTECHNOL BIOTEC EQ, V29, P1024, DOI 10.1080/13102818.2015.1079144; Baloglu Mehmet Cengiz, 2014, Plant Omics, V7…	96	2	2	7	36	SPRINGER	DORDRECHT	VAN GODEWIJCKSTRAAT 30, 3311 GZ DORDRECHT, NETHERLANDS	0167-6903	1573-5087		PLANT GROWTH REGUL	Plant Growth Regul.	NOV	2016	80	2					225	241		10.1007/s10725-016-0160-4
J	Buthelezi, SG; Dirr, HW; Chakauya, E; Chikwamba, R; Martens, L; Tsekoa, TL; Stoychev, SH; Vandermarliere, E				Buthelezi, Sindisiwe G.; Dirr, Heini W.; Chakauya, Ereck; Chikwamba, Rachel; Martens, Lennart; Tsekoa, Tsepo L.; Stoychev, Stoyan H.; Vandermarliere, Elien			The Lyssavirus glycoprotein: A key to cross-immunity	VIROLOGY			English	Article						Rabies; Lyssavirus; Glycoprotein; Cross-neutralization	RABIES VIRUS GLYCOPROTEIN; HUMAN MONOCLONAL-ANTIBODY; CONSERVATION; EPITOPE; PREDICTION; FAMILIES; FEATURES; FUSION; DOMAIN; BAT	Rabies is an acute viral encephalomyelitis in warm-blooded vertebrates, caused by viruses belonging to Rhabdovirus family and genus Lyssavirus. Although rabies is categorised as a neglected disease, the rabies virus (RABV) is the most studied amongst Lyssaviruses which show nearly identical infection patterns. In efforts to improving post-exposure prophylaxis, several anti-rabies monoclonal antib…	Department of Science and Technology; National Research Foundation [64788]	H.W.D is a South African Research Chair funded by the Department of Science and Technology and the National Research Foundation (Grant 64788).	Albertini AAV, 2012, VIRUSES-BASEL, V4, P117, DOI 10.3390/v4010117; ALTSCHUL SF, 1990, J MOL BIOL, V215, P403, DOI 10.1006/jmbi.1990.9999; Ceballos NA, 2013, EMERG INFECT DIS, V19, P793, DOI 10.3201/eid1905.121071; Bakker ABH, 2005, J VIROL, V79, P9062, DOI 10.1128/JVI.79.14.9062-9068.2005; Berman HM, 2000, NUCLEIC ACIDS RES, V28, P235, DOI 10.1093/nar/28.1.235; Champion JM, 2000, J IMMUNOL METHO…	40	1	1	2	19	ACADEMIC PRESS INC ELSEVIER SCIENCE	SAN DIEGO	525 B ST, STE 1900, SAN DIEGO, CA 92101-4495 USA	0042-6822			VIROLOGY	Virology	NOV	2016	498						250	256		10.1016/j.virol.2016.08.034
J	Marchesini, S; Tu, YC; Wu, HT				Marchesini, Stefano; Tu, Yu-Chao; Wu, Hau-Tieng			Alternating projection, ptychographic imaging and phase synchronization	APPLIED AND COMPUTATIONAL HARMONIC ANALYSIS			English	Article						Phase retrieval; Ptychography; Alternating projection; Graph connection Laplacian; Phase synchronization	X-RAY-DIFFRACTION; RETRIEVAL ALGORITHMS; CONNECTION LAPLACIAN; ELECTRON-DIFFRACTION; COMPUTED-TOMOGRAPHY; MICROSCOPY; RESOLUTION; RECONSTRUCTION; MAGNITUDE; ILLUMINATION	We demonstrate necessary and sufficient conditions of the local convergence of the alternating projection algorithm to a unique solution up to a global phase factor. Additionally, for the ptychography imaging problem, we discuss phase synchronization and graph connection Laplacian, and show how to construct an accurate initial guess to accelerate convergence speed to handle the big imaging data i…	Applied Mathematical Sciences subprogram of the Office of Energy Research, U.S. Department of Energy [DE-AC02-05CH11231]; AFOSR [FA9550-09-1-0643]	This research was supported in part by the Applied Mathematical Sciences subprogram of the Office of Energy Research, U.S. Department of Energy, under contract DE-AC02-05CH11231 (SM) and by AFOSR grant FA9550-09-1-0643 (HT). The authors would like to thank Professor Arthur Szlam, Dr. Jeffrey J. Donatelli and Dr. Wenjing Liao for their inputs to improve the paper. H.-T. Wu thanks Professor Ingrid …	Alexeev B., 2013, SIAM J IMAGING SCI; Wang Y., 2013, APPL COMPUT HARMON A; Balan R, 2006, APPL COMPUT HARMON A, V20, P345, DOI 10.1016/j.acha.2005.07.001; Bandeira AS, 2013, SIAM J MATRIX ANAL A, V34, P1611, DOI 10.1137/120875338; Bandeira A. S., 2013, APPL COMPUT HARMON A; BATES RHT, 1984, COMPUT VISION GRAPH, V25, P205, DOI 10.1016/0734-189X(84)90103-8; Bauschke HH, 2002, J OPT SOC AM A, V19, P…	73	4	4	2	11	ACADEMIC PRESS INC ELSEVIER SCIENCE	SAN DIEGO	525 B ST, STE 1900, SAN DIEGO, CA 92101-4495 USA	1063-5203	1096-603X		APPL COMPUT HARMON A	Appl. Comput. Harmon. Anal.	NOV	2016	41	3					815	851		10.1016/j.acha.2015.06.005
J	Barasch, J; Hollmen, M; Deng, R; Hod, EA; Rupert, PB; Abergel, RJ; Allred, BE; Xu, K; Darrah, SF; Tekabe, Y; Perlstein, A; Wax, R; Bruck, E; Stauber, J; Corbin, KA; Buchen, C; Slavkovich, V; Graziano, J; Spitalnik, SL; Bao, GH; Strong, RK; Qiu, AD				Barasch, Jonathan; Hollmen, Maria; Deng, Rong; Hod, Eldad A.; Rupert, Peter B.; Abergel, Rebecca J.; Allred, Benjamin E.; Xu, Katherine; Darrah, Shaun F.; Tekabe, Yared; Perlstein, Alan; Wax, Rebecca; Bruck, Efrat; Stauber, Jacob; Corbin, Kaitlyn A.; Buchen, Charles; Slavkovich, Vesna; Graziano, Joseph; Spitalnik, Steven L.; Bao, Guanhu; Strong, Roland K.; Qiu, Andong			Disposal of iron by a mutant form of lipocalin 2	NATURE COMMUNICATIONS			English	Article							GELATINASE-ASSOCIATED LIPOCALIN; ISCHEMIA-REPERFUSION INJURY; HEREDITARY HEMOCHROMATOSIS; NEUTROPHIL LIPOCALIN; CHELATION-THERAPY; DISTAL NEPHRON; IMMUNE-SYSTEM; BOUND IRON; OVERLOAD; ENTEROBACTIN	Iron overload damages many organs. Unfortunately, therapeutic iron chelators also have undesired toxicity and may deliver iron to microbes. Here we show that a mutant form (K3Cys) of endogenous lipocalin 2 (LCN2) is filtered by the kidney but can bypass sites of megalin-dependent recapture, resulting in urinary excretion. Because K3Cys maintains recognition of its cognate ligand, the iron siderop…	March of Dimes Research Grant; AHA Grant [14GRNT18840098]; China National Science Foundation [81170654/H0507]; [R21 DK091729]; [R01DK073462]; [R01DK092684]; [R01DK07346]	We are grateful that for the help provided by Dr Thomas Willnow, Max-DelbruckCentrum fur Molekulare Medizin (MDC) for the megalin-floxed (Lrp2-loxp) mice. J.B. was supported by R21 DK091729, R01DK073462, R01DK092684, and by a March of Dimes Research Grant. RKS was supported by R21 DK091729, R01DK07346. AQ was supported by an AHA Grant 14GRNT18840098., G.B. was supported by China National Science …	Abergel RJ, 2006, P NATL ACAD SCI USA, V103, P18499, DOI 10.1073/pnas.0607055103; Abergel RJ, 2006, J AM CHEM SOC, V128, P10998, DOI 10.1021/ja062476+; AISEN P, 1978, J BIOL CHEM, V253, P1930; ALFREY AC, 1992, AM J PHYSIOL, V263, pF637; Allen KJ, 2008, NEW ENGL J MED, V358, P221, DOI 10.1056/NEJMoa073286; Andrews NC, 1999, NEW ENGL J MED, V341, P1986, DOI 10.1056/NEJM199912233412607; Argyropoulou…	70	3	3	4	11	NATURE PUBLISHING GROUP	LONDON	MACMILLAN BUILDING, 4 CRINAN ST, LONDON N1 9XW, ENGLAND	2041-1723			NAT COMMUN	Nat. Commun.	2018-10-31	2016	7								12973	10.1038/ncomms12973
J	Chakavorty, A; Li, L; Alexov, E				Chakavorty, Arghya; Li, Lin; Alexov, Emil			Electrostatic Component of Binding Energy: Interpreting Predictions from Poisson-Boltzmann Equation and Modeling Protocols	JOURNAL OF COMPUTATIONAL CHEMISTRY			English	Article						electrostatics; protein binding free energy; energy minimization; Gaussian-based dielectric function	BORN IMPLICIT SOLVENT; PH MOLECULAR-DYNAMICS; PROTEIN DATA-BANK; GENERALIZED BORN; DIELECTRIC FUNCTION; EXPLICIT SOLVENT; LIGAND-BINDING; FORCE-FIELD; SIMULATIONS; SOLVATION	Macromolecular interactions are essential for understanding numerous biological processes and are typically characterized by the binding free energy. Important component of the binding free energy is the electrostatics, which is frequently modeled via the solutions of the Poisson-Boltzmann Equations (PBE). However, numerous works have shown that the electrostatic component (Delta Delta G(elec)) o…	NIH [R01GM093937]	Contract grant sponsor: NIH; Contract grant number: R01GM093937	Archontis G, 2001, J MOL BIOL, V306, P307, DOI 10.1006/jmbi.2000.4285; Baker NA, 2001, P NATL ACAD SCI USA, V98, P10037, DOI 10.1073/pnas.181342398; Bashford D, 2000, ANNU REV PHYS CHEM, V51, P129, DOI 10.1146/annurev.physchem.51.1.129; Berman HM, 2002, ACTA CRYSTALLOGR D, V58, P899, DOI 10.1107/S0907444902003451; Berman HM, 2000, NUCLEIC ACIDS RES, V28, P235, DOI 10.1093/nar/28.1.235; Bertonati …	71	2	2	2	14	WILEY-BLACKWELL	HOBOKEN	111 RIVER ST, HOBOKEN 07030-5774, NJ USA	0192-8651	1096-987X		J COMPUT CHEM	J. Comput. Chem.	2018-10-30	2016	37	28					2495	2507		10.1002/jcc.24475
J	Banerjee, A; Ray, S				Banerjee, Arundhati; Ray, Sujay			Structural insight with mutational impact on tyrosinase and PKC-beta interaction from Homo sapiens: Molecular modeling and docking studies for melanogenesis, albinism and increased risk for melanoma	GENE			English	Article						Molecular modeling; Melanogenesis; Mutational impact; Multiple sequence alignment; Docked protein-protein interaction and biostatistics	PROTEIN STRUCTURES; MINIMIZATION; PREDICTION; MECHANISM; ALIGNMENT; FEATURES; DATABASE; ENERGY; SITES	Human tyrosinase, is an important protein for biosynthetic pathway of melanin. It was studied to be phosphorylated and activated by protein kinase-C, beta-subunit (PKC-beta) through earlier experimentations with in vivo evidences. Documentation documents that mutation in two essentially vital serine residues in C-terminal end of tyrosinase leads to albinism. Due to the deficiency of protective sh…	DBT; Department of Biotechnology, National Institute of Technology Durgapur	Authors are deeply indebted to DBT sponsored Bioinformatics Infrastructure Facility in Department of Biochemistry and Biophysics, University of Kalyani for providing essential infrastructural support. Authors also render gratefulness to the Department of Biotechnology, National Institute of Technology Durgapur for the support.	ALTSCHUL SF, 1990, J MOL BIOL, V215, P403, DOI 10.1006/jmbi.1990.9999; Bagchi A., 2014, APPL BIOCH BIOTECHNO; Baker D, 2001, SCIENCE, V294, P93, DOI 10.1126/science.1065659; Baldwin RL, 1996, BIOPHYS J, V71, P2056; Banerjee A., 2016, HDB RES NATURAL COMP, P802; Banerjee A., 2016, SCIENTIFICA, V1-11; Banerjee A., 2015, ADV INTELLIGENT SYST, V404, P43, DOI DOI 10.1007/978-81-322-2695-6_5; Banerjee …	59	1	1	4	27	ELSEVIER SCIENCE BV	AMSTERDAM	PO BOX 211, 1000 AE AMSTERDAM, NETHERLANDS	0378-1119	1879-0038		GENE	Gene	2018-10-30	2016	592	1					99	109		10.1016/j.gene.2016.07.046
J	Engdahl, C; Knutsson, S; Ekstrom, F; Linusson, A				Engdahl, Cecilia; Knutsson, Sofie; Ekstrom, Fredrik; Linusson, Anna			Discovery of Selective Inhibitors Targeting Acetylcholinesterase 1 from Disease-Transmitting Mosquitoes	JOURNAL OF MEDICINAL CHEMISTRY			English	Article							ANOPHELES-GAMBIAE ACETYLCHOLINESTERASE; INSECTICIDE RESISTANCE; MALARIA MOSQUITO; AEDES-AEGYPTI; MACROMOLECULAR STRUCTURES; CONFORMATIONAL ENERGIES; CARBAMATE INSECTICIDES; POTENT INHIBITORS; MOLECULAR-CLONING; WILD-TYPE	Vector control of disease-transmitting mosquitoes is increasingly important due to the re-emergence and spread of infections such as malaria and dengue. We have conducted a high throughput screen (HTS) of 17,500 compounds for inhibition of the essential AChE1 enzymes from the mosquitoes Anopheles gambiae and Aedes aegypti. In a differential HTS analysis including the human AChE, several structura…	Swedish Research Council [2014-2636]	This research was funded by the Swedish Research Council (grant number: 2014-2636). We thank staff at the LCBU for valuable support during the screening campaign, and Nina Forsgren and Tomas Kindahl for contributions to the biochemical evaluations and organic syntheses. We are also grateful for excellent technical support at the MAXIab beamlines.	About H., 2007, INSECT BIOCHEM MOLEC, V37, P41; Adams PD, 2002, ACTA CRYSTALLOGR D, V58, P1948, DOI 10.1107/S0907444902016657; Alout H, 2012, PLOS ONE, V7, DOI 10.1371/journal.pone.0047125; Andersson CD, 2013, J MED CHEM, V56, P7615, DOI 10.1021/jm400990p; ANTHONY N, 1995, FEBS LETT, V368, P461, DOI 10.1016/0014-5793(95)00711-H; Artursson E, 2009, TOXICOLOGY, V265, P108, DOI 10.1016/j.tox.2009.09…	88	2	2	7	16	AMER CHEMICAL SOC	WASHINGTON	1155 16TH ST, NW, WASHINGTON, DC 20036 USA	0022-2623	1520-4804		J MED CHEM	J. Med. Chem.	2018-10-27	2016	59	20					9409	9421		10.1021/acs.jmedchem.6b00967
J	Chernev, P; Zaharieva, I; Rossini, E; Galstyan, A; Dau, H; Knapp, EW				Chernev, Petko; Zaharieva, Ivelina; Rossini, Emanuele; Galstyan, Artur; Dau, Holger; Knapp, Ernst-Walter			Merging Structural Information from X-ray Crystallography, Quantum Chemistry, and EXAFS Spectra: The Oxygen-Evolving Complex in PSII	JOURNAL OF PHYSICAL CHEMISTRY B			English	Article							ABSORPTION FINE-STRUCTURE; O BOND FORMATION; PHOTOSYNTHETIC WATER OXIDATION; COUPLED ELECTRON-TRANSFER; EFFECTIVE CORE POTENTIALS; II MEMBRANE-PARTICLES; RESOLUTION CRYSTAL-STRUCTURE; FULL GEOMETRY OPTIMIZATIONS; NEAR-EDGE STRUCTURE; FREE R-VALUE	Structural data of the oxygen-evolving complex (OEC) in photosystem II (PSII) determined by X-ray crystallography, quantum chemistry (QC), and extended X-ray absorption fine structure (EXAFS) analyses are presently inconsistent. Therefore, a detailed study of what information can be gained about the OEC through a comparison of QC and crystallographic structure information combined with the inform…	Deutsche Forschungsgemeinschaft (DFG) through collaborative research center (CRC) 1078	The authors gratefully acknowledge financial support from the Deutsche Forschungsgemeinschaft (DFG) through collaborative research center (CRC) 1078 projects A4 and C2. They also like to thank Dr. Wolfram Saenger for fruitful discussions, Dr. Arturo Robertazzi for preliminary studies, and Dr. Dennis Diestler for critical reading of the manuscript.	AHLRICHS R, 1989, CHEM PHYS LETT, V162, P165, DOI 10.1016/0009-2614(89)85118-8; Ames W, 2011, J AM CHEM SOC, V133, P19743, DOI 10.1021/ja2041805; Ankudinov AL, 1998, PHYS REV B, V58, P7565, DOI 10.1103/PhysRevB.58.7565; ASHLEY CA, 1975, PHYS REV B, V11, P1279, DOI 10.1103/PhysRevB.11.1279; Askerka M, 2015, BIOCHEMISTRY-US, V54, P1713, DOI 10.1021/acs.biochem.5b00089; Barber J, 2009, CHEM SOC REV,…	196	4	4	4	27	AMER CHEMICAL SOC	WASHINGTON	1155 16TH ST, NW, WASHINGTON, DC 20036 USA	1520-6106			J PHYS CHEM B	J. Phys. Chem. B	2018-10-27	2016	120	42					10899	10922		10.1021/acs.jpcb.6b05800
J	Meinke, G; Bohm, A; Hauber, J; Pisabarro, MT; Buchholz, F				Meinke, Gretchen; Bohm, Andrew; Hauber, Joachim; Pisabarro, M. Teresa; Buchholz, Frank			Cre Recombinase and Other Tyrosine Recombinases	CHEMICAL REVIEWS			English	Review							SITE-SPECIFIC RECOMBINATION; PLURIPOTENT STEM-CELLS; MEDIATED CASSETTE EXCHANGE; HOLLIDAY JUNCTION COMPLEX; PROTEIN-DNA INTERACTIONS; REGULATED RNA INTERFERENCE; INHIBIT HIV-1 REPLICATION; ZINC-FINGER NUCLEASES; FLPO DELETER MICE; IN-VIVO	Tyrosine-type site-specific recombinases (T-SSRs) have opened new avenues for the predictable modification of genomes as they enable precise genome editing in heterologous hosts. These enzymes are ubiquitous in eubacteria, prevalent in archaea and temperate phages, present in certain yeast strains, but barely found in higher eukaryotes. As tools they find increasing use for the generation and sys…	EU FP7 Grant SyBoSS [242129]; DFG [SFB655, BU1400/3-1, BU1400/5-1, TPB05]; TUD Excellence initiative by the German Federal and State Governments (Institutional Strategy, measure "support the best") FunPerMed; Bayer hemophilia awards program; BMBF [GO-Bio FKZ 0315090]; Else Kroner-Fresenius-Stiftung [2010_A82]; "Viral Latency" program at the Heinrich Pette Institute-Leibniz Institute for Experimen…	The authors thank Josh Currie and Elly Tanaka (CRTD, Dresden, Germany) for providing the "Brainbow image" shown in Figure 16. The Buchholz laboratory was supported by the EU FP7 Grant SyBoSS (242129), the DFG Grants SFB655 (TPB05), BU1400/3-1, and BU1400/5-1, the TUD Excellence initiative by the German Federal and State Governments (Institutional Strategy, measure "support the best") FunPerMed, a…	Abi-Ghanem J, 2015, J COMPUT AID MOL DES, V29, P271, DOI 10.1007/s10822-014-9825-0; Abi-Ghanem J, 2013, NUCLEIC ACIDS RES, V41, P2394, DOI 10.1093/nar/gks1308; ABREMSKI K, 1984, J BIOL CHEM, V259, P1509; Aguado C, 2014, PLOS GENET, V10, DOI 10.1371/journal.pgen.1004208; Aharoni A, 2005, NAT GENET, V37, P73, DOI 10.1038/ng1482; Aihara H, 2007, MOL CELL, V27, P901, DOI 10.1016/j.molcel.2007.07.026;…	359	5	5	5	21	AMER CHEMICAL SOC	WASHINGTON	1155 16TH ST, NW, WASHINGTON, DC 20036 USA	0009-2665	1520-6890		CHEM REV	Chem. Rev.	2018-10-26	2016	116	20					12785	12820		10.1021/acs.chemrev.6b00077
J	Ebrahim, A; Brunk, E; Tan, J; O'Brien, EJ; Kim, D; Szubin, R; Lerman, JA; Lechner, A; Sastry, A; Bordbar, A; Feist, AM; Palsson, BO				Ebrahim, Ali; Brunk, Elizabeth; Tan, Justin; O'Brien, Edward J.; Kim, Donghyuk; Szubin, Richard; Lerman, Joshua A.; Lechner, Anna; Sastry, Anand; Bordbar, Aarash; Feist, Adam M.; Palsson, Bernhard O.			Multi-omic data integration enables discovery of hidden biological regularities	NATURE COMMUNICATIONS			English	Article							GENOME-SCALE MODELS; ESCHERICHIA-COLI; PROTEOME QUANTIFICATION; SYSTEMS BIOLOGY; EXIT TUNNEL; RIBOSOME; RECONSTRUCTION; EXPRESSION; YEAST; TRANSLATION	Rapid growth in size and complexity of biological data sets has led to the 'Big Data to Knowledge' challenge. We develop advanced data integration methods for multi- level analysis of genomic, transcriptomic, ribosomal profiling, proteomic and fluxomic data. First, we show that pairwise integration of primary omics data reveals regularities that tie cellular processes together in Escherichia coli…	Novo Nordisk Foundation [NNF16CC0021858]; U.S. Department of Energy [DE-FOA-000014]; National Institutes of Health [NIH R01 GM057089]; Swiss National Science Foundation [p2elp2_148961]; Office of Science of the US Department of Energy [DE-AC02-05CH11231]	This work was funded from a generous gift from the Novo Nordisk Foundation to the Center for Biosustainability (grant NNF16CC0021858). It was also supported by DE-FOA-000014 from the U.S. Department of Energy, NIH R01 GM057089 from the National Institutes of Health and by the Swiss National Science Foundation (grant p2elp2_148961 to E.B). This research used resources of the National Energy Resear…	Aebersold R, 2003, NATURE, V422, P198, DOI 10.1038/nature01511; Arike L, 2012, J PROTEOMICS, V75, P5437, DOI 10.1016/j.jprot.2012.06.020; Benson DA, 2013, NUCLEIC ACIDS RES, V41, pD36, DOI 10.1093/nar/gks1195; Berger B, 2013, NAT REV GENET, V14, P333, DOI 10.1038/nrg3433; Berman HM, 2000, NUCLEIC ACIDS RES, V28, P235, DOI 10.1093/nar/28.1.235; Bhushan S, 2010, NAT STRUCT MOL BIOL, V17, P313, DOI …	44	8	8	13	22	NATURE PUBLISHING GROUP	LONDON	MACMILLAN BUILDING, 4 CRINAN ST, LONDON N1 9XW, ENGLAND	2041-1723			NAT COMMUN	Nat. Commun.	2018-10-26	2016	7								13091	10.1038/ncomms13091
J	Garzon, JI; Deng, L; Murray, D; Shapira, S; Petrey, D; Honig, B				Garzon, Jose Ignacio; Deng, Lei; Murray, Diana; Shapira, Sagi; Petrey, Donald; Honig, Barry			A computational interactome and functional annotation for the human proteome	ELIFE			English	Article							MOLECULAR INTERACTION DATABASE; INTERACTION NETWORKS; EXPRESSION PROFILES; SCALE MAP; SEQUENCES; UPDATE; PREDICTION; EVOLUTIONARY; COMPLEXES; PROTEINS	We present a database, PrePPI (Predicting Protein-Protein Interactions), of more than 1.35 million predicted protein-protein interactions (PPIs). Of these at least 127,000 are expected to constitute direct physical interactions although the actual number may be much larger (similar to 500,000). The current PrePPI, which contains predicted interactions for about 85% of the human proteome, is relat…	National Institutes of Health [GM030518, S10OD012351, S10OD021764]	National Institutes of Health GM030518 Barry Honig; National Institutes of Health S10OD012351 Jose Ignacio Garzon Lei Deng Diana Murray Sagi Shapira Donald Petrey Barry Honig; National Institutes of Health S10OD021764 Jose Ignacio Garzon Lei Deng Diana Murray Sagi Shapira Donald Petrey Barry Honig	Altenhoff AM, 2015, NUCLEIC ACIDS RES, V43, pD240, DOI 10.1093/nar/gku1158; Ashburner M, 2000, NAT GENET, V25, P25; Auton A., 2015, NATURE, V526, P68, DOI DOI 10.1038/NATURE15393; Beigi F, 2013, CIRC RES, V113, P372, DOI 10.1161/CIRCRESAHA.113.301075; Berman HM, 2000, NUCLEIC ACIDS RES, V28, P235, DOI 10.1093/nar/28.1.235; Bhardwaj N, 2005, BIOINFORMATICS, V21, P2730, DOI 10.1093/bioinformatics/b…	78	4	4	2	4	ELIFE SCIENCES PUBLICATIONS LTD	CAMBRIDGE	SHERATON HOUSE, CASTLE PARK, CAMBRIDGE, CB3 0AX, ENGLAND	2050-084X			ELIFE	eLife	2018-10-22	2016	5								e18715	10.7554/eLife.18715
J	Salar, U; Taha, M; Khan, KM; Ismail, NH; Imran, S; Perveen, S; Gul, S; Wadood, A				Salar, Uzma; Taha, Muhammad; Khan, Khalid Mohammed; Ismail, Nor Hadiani; Imran, Syahrul; Perveen, Shahnaz; Gul, Sahib; Wadood, Abdul			Syntheses of new 3-thiazolyl coumarin derivatives, in vitro alpha-glucosidase inhibitory activity, and molecular modeling studies	EUROPEAN JOURNAL OF MEDICINAL CHEMISTRY			English	Article						Synthesis; 3-Thiazolylcoumarin; alpha-Glucosidase; Structure-activity relationship; Docking studies; Diabetic complications; Acarbose	BIOLOGICAL EVALUATION; AGENTS; DOCKING; ANALOGS; POTENT; ANTICANCER; THIAZOLES; DISCOVERY; SKELETON; CANCER	3-Thiazolylcoumarin derivatives 1-14 were synthesized via one-pot two step reactions, and screened for in vitro alpha-glucosidase inhibitory activity. All compounds showed inhibitory activity in the range of IC50 = 0.12 +/- 0.01-16.20 +/- 0.23 mu M as compared to standard acarbose (IC50 = 38.25 +/- 0.12 mu M), and also found to be nontoxic. Molecular docking study was carried out in order to esta…	Higher Education Commission (HEC) Pakistan under the National Research Program for Universities [20-1910]	The authors are thankful to Higher Education Commission (HEC) Pakistan, for funding to Project No. 20-1910 under the National Research Program for Universities.	AG H., 1994, EUR J CLIN INVEST, V24, P3; Altschul SF, 1997, NUCLEIC ACIDS RES, V25, P3389, DOI 10.1093/nar/25.17.3389; Appendino G, 2004, J NAT PROD, V67, P2108, DOI 10.1021/np049706n; Berman HM, 2000, NUCLEIC ACIDS RES, V28, P235, DOI 10.1093/nar/28.1.235; Das J, 2006, BIOORG MED CHEM LETT, V16, P3706, DOI 10.1016/j.bmcl.2006.04.060; Davis SN, 1996, PHARMACOL BASIS THER, P1487; EI-Subbagh H. I.,…	53	12	12	1	29	ELSEVIER FRANCE-EDITIONS SCIENTIFIQUES MEDICALES ELSEVIER	PARIS	23 RUE LINOIS, 75724 PARIS, FRANCE	0223-5234	1768-3254		EUR J MED CHEM	Eur. J. Med. Chem.	2018-10-21	2016	122						196	204		10.1016/j.ejmech.2016.06.037
J	Nandy, SK; Seal, A				Nandy, Suman Kumar; Seal, Alpana			Structural Dynamics Investigation of Human Family 1 & 2 Cystatin-Cathepsin L1 Interaction: A Comparison of Binding Modes	PLOS ONE			English	Article							B STEFIN-B; PROTEIN DOCKING PREDICTIONS; RAY CRYSTAL-STRUCTURE; N-TERMINAL REGION; CYSTEINE PROTEINASES; MOLECULAR-DYNAMICS; SHAPE COMPLEMENTARITY; INHIBITORS STEFIN; REACTIVE-SITE; BREAST-CANCER	Cystatin superfamily is a large group of evolutionarily related proteins involved in numerous physiological activities through their inhibitory activity towards cysteine proteases. Despite sharing the same cystatin fold, and inhibiting cysteine proteases through the same tripartite edge involving highly conserved N-terminal region, L1 and L2 loop; cystatins differ widely in their inhibitory affin…	Bioinformatics Infrastructure Facility (BIF), University of Kalyani	We convey our sincere thanks to DBT sponsored Bioinformatics Infrastructure Facility (BIF), University of Kalyani, where the whole study took place. We also acknowledge Shri Rajabrta Bhuyan for his help.	BARRETT AJ, 1986, BIOCHEM J, V236, P312; BERENDSEN HJC, 1987, J PHYS CHEM-US, V91, P6269, DOI 10.1021/j100308a038; Berman HM, 2000, NUCLEIC ACIDS RES, V28, P235, DOI 10.1093/nar/28.1.235; Bjork I, 1996, BIOCHEMISTRY-US, V35, P10720, DOI 10.1021/bi960420u; BODE W, 1988, EMBO J, V7, P2593; Bussi G, 2007, J CHEM PHYS, V126, DOI 10.1063/1.2408420; Caves LSD, 1998, PROTEIN SCI, V7, P649; Chen HL, 2005…	55	1	1	0	4	PUBLIC LIBRARY SCIENCE	SAN FRANCISCO	1160 BATTERY STREET, STE 100, SAN FRANCISCO, CA 94111 USA	1932-6203			PLOS ONE	PLoS One	2018-10-20	2016	11	10							e0164970	10.1371/journal.pone.0164970
J	Robaa, D; Wagner, T; Luise, C; Carlino, L; McMillan, J; Flaig, R; Schule, R; Jung, M; Sippl, W				Robaa, Dina; Wagner, Tobias; Luise, Chiara; Carlino, Luca; McMillan, Joel; Flaig, Ralf; Schuele, Roland; Jung, Manfred; Sippl, Wolfgang			Identification and Structure-Activity Relationship Studies of Small-Molecule Inhibitors of the Methyllysine Reader Protein Spindlin1	CHEMMEDCHEM			English	Article						AlphaLISA assay; lead optimization; methyllysine readers; Spindlin1; virtual screening	LYSINE BINDING-PROTEINS; EPIGENETIC MODIFICATIONS; CARDIOVASCULAR-DISEASE; HISTONE MODIFICATIONS; CHEMICAL PROBE; CANCER; DISCOVERY; THERAPY; LIGANDS; NEURODEGENERATION	The methyllysine reader protein Spindlin1 has been implicated in the tumorigenesis of several types of cancer and may be an attractive novel therapeutic target. Small-molecule inhibitors of Spindlin1 should be valuable as chemical probes as well as potential new therapeutics. We applied an iterative virtual screening campaign, encompassing structure-and ligand-based approaches, to identify potent…	Deutsche Forschungsgemeinschaft (DFG) [CRC992]; European Research Council [ERC] [322844]; DFG [CRC850, CRC746, Schu688/12-1]	M.J. (Project A04) and R.S. (Project B1) thank the Deutsche Forschungsgemeinschaft (DFG) [CRC992, Medical Epigenetics]. R. S. further thanks the European Research Council [ERC AdGrant 322844], the DFG [CRC850, CRC746, and Schu688/12-1]. We thank Richard T. Cummings and Nico Cantone (Constellation Pharmaceuticals, Cambridge, MA, USA) for carrying out the DOTL1 and EZH2 assays, and Holger Greschik …	Baell JB, 2010, J MED CHEM, V53, P2719, DOI 10.1021/jm901137j; Barakat SES, 2007, PHOSPHORUS SULFUR, V182, P65, DOI 10.1080/10426500600867042; Berman HM, 2000, NUCLEIC ACIDS RES, V28, P235, DOI 10.1093/nar/28.1.235; Berthold MR, 2009, ACM SIGKDD EXPLOR NE, V11, P26, DOI DOI 10.1145/1656274.1656280; Brand M, 2015, ACS CHEM BIOL, V10, P22, DOI 10.1021/cb500996u; Calestani G, 2001, TETRAHEDRON, V57,…	57	4	4	2	9	WILEY-V C H VERLAG GMBH	WEINHEIM	POSTFACH 101161, 69451 WEINHEIM, GERMANY	1860-7179	1860-7187		CHEMMEDCHEM	ChemMedChem	2018-10-19	2016	11	20					2327	2338		10.1002/cmdc.201600362
J	Tanyalcin, I; Stouffs, K; Daneels, D; Assaf, C; Lissens, W; Jansen, A; Gheldof, A				Tanyalcin, Ibrahim; Stouffs, Katrien; Daneels, Dorien; Al Assaf, Carla; Lissens, Willy; Jansen, Anna; Gheldof, Alexander			Convert your favorite protein modeling program into a mutation predictor: "MODICT"	BMC BIOINFORMATICS			English	Article						Prediction; 3D protein model; Bioinformatics	SINGLE NUCLEOTIDE POLYMORPHISMS; PHENYLALANINE-HYDROXYLASE; MISSENSE MUTATIONS; I-TASSER; VARIANTS; SERVER; POLYMICROGYRIA; DEFICIENCY; DYNAMICS; DISEASE	Background: Predict whether a mutation is deleterious based on the custom 3D model of a protein. Results: We have developed MODICT, a mutation prediction tool which is based on per residue RMSD (root mean square deviation) values of superimposed 3D protein models. Our mathematical algorithm was tested for 42 described mutations in multiple genes including renin (REN), beta-tubulin (TUBB2B), bioti…	Scientific Fund Willy Gepts; Foundation Marguerite Delacroix; Research Foundation Flanders	Ibrahim Tanyalcin received funding from Scientific Fund Willy Gepts and the Foundation Marguerite Delacroix. AJ received funding from the Research Foundation Flanders.	Abdollahi MR, 2009, AM J HUM GENET, V85, P737, DOI 10.1016/j.ajhg.2009.10.007; Adzhubei IA, 2010, NAT METHODS, V7, P248, DOI 10.1038/nmeth0410-248; Amrom D, 2014, CLIN GENET, V85, P178, DOI 10.1111/cge.12141; Arnold K, 2006, BIOINFORMATICS, V22, P195, DOI 10.1093/bioinformatics/bti770; Bateman A, 2015, NUCLEIC ACIDS RES, V43, pD204, DOI 10.1093/nar/gku989; Berman HM, 2000, NUCLEIC ACIDS RES, V28,…	55	0	0	0	2	BIOMED CENTRAL LTD	LONDON	236 GRAYS INN RD, FLOOR 6, LONDON WC1X 8HL, ENGLAND	1471-2105			BMC BIOINFORMATICS	BMC Bioinformatics	2018-10-19	2016	17								425	10.1186/s12859-016-1286-0
J	Bjornmalm, M; Faria, M; Caruso, F				Bjornmalm, Mattias; Faria, Matthew; Caruso, Frank			Increasing the Impact of Materials in and beyond Bio-Nano Science	JOURNAL OF THE AMERICAN CHEMICAL SOCIETY			English	Review							ORGANS-ON-CHIPS; DRUG-DELIVERY; MINIMUM INFORMATION; OPEN INNOVATION; GENOMICS DATA; TRIAL DATA; REPRODUCIBILITY; NANOPARTICLES; NANOTECHNOLOGY; PRINCIPLES	This is an exciting timefor the field of bio-nano science: enormous progress has been made in recent years, especially in academic research, and materials developed and studied in this area are poised to make a substantial impact in real-world applications. Herein, we discuss ways to leverage the strengths of the field, current limitations, and valuable lessons learned from neighboring fields tha…	Australian Research Council (ARC) Centre of Excellence in Convergent Bio-Nano Science and Technology [CE140100036]; ARC under the Australian Laureate Fellowship scheme [FL120100030]	This research was conducted and funded by the Australian Research Council (ARC) Centre of Excellence in Convergent Bio-Nano Science and Technology (Project CE140100036), and supported by the ARC under the Australian Laureate Fellowship scheme (FL120100030). We thank Alison E. Burke and Cassio Lynm for assistance with preparing the figure, and Edmund J. Crampin, Andrea O'Connor, and Stephen J. Ken…	Aarts AA, 2015, SCIENCE, V349, DOI 10.1126/science.aac4716; AlQuraishi M., 2016, SCI TRANSL MED, V8; Baker M, 2016, NATURE, V533, P452, DOI 10.1038/533452a; Baker M, 2016, NATURE, V530, P141, DOI 10.1038/nature.2016.19269; Barrett T, 2013, NUCLEIC ACIDS RES, V41, pD991, DOI 10.1093/nar/gks1193; Begley CG, 2015, CIRC RES, V116, P116, DOI 10.1161/CIRCRESAHA.114.303819; Benam KH, 2015, ANNU REV PATH…	128	10	10	26	76	AMER CHEMICAL SOC	WASHINGTON	1155 16TH ST, NW, WASHINGTON, DC 20036 USA	0002-7863			J AM CHEM SOC	J. Am. Chem. Soc.	2018-10-19	2016	138	41					13449	13456		10.1021/jacs.6b08673
J	Huang, JJ; Li, KJ; Gribskov, M				Huang, Jiajie; Li, Kejie; Gribskov, Michael			Accurate Classification of RNA Structures Using Topological Fingerprints	PLOS ONE			English	Article							SECONDARY STRUCTURE PREDICTION; DYNAMIC-PROGRAMMING ALGORITHM; PROTEIN DATA-BANK; INCLUDING PSEUDOKNOTS; NONCODING RNAS; ABSTRACT SHAPES; RIBONUCLEASE-P; RIBOSOMAL-RNA; SEQUENCE; GRAPHS	While RNAs are well known to possess complex structures, functionally similar RNAs often have little sequence similarity. While the exact size and spacing of base-paired regions vary, functionally similar RNAs have pronounced similarity in the arrangement, or topology, of base-paired stems. Furthermore, predicted RNA structures often lack pseudoknots (a crucial aspect of biological activity), and…	U.S. National Science Foundation [DBI-0850148]	This work was supported by The U.S. National Science Foundation [DBI-0850148] (http://www.nsf.gov/). This funder had no role in study design, data collection and analysis, decision to publish, or preparation of the manuscript. The first author, Jiajie Huang, is currently employed by Thermo Fisher Scientific. The second author, Kejie Li, is currently employed by Biogen Idec. These commercial affil…	Adams PL, 2004, NATURE, V430, P45, DOI 10.1038/nature02642; Andronescu M, 2008, BMC BIOINFORMATICS, V9, DOI 10.1186/1471-2105-9-340; Avihoo A, 2011, BMC BIOINFORMATICS, V12, DOI 10.1186/1471-2105-12-319; Barash D, 2004, J COMPUT BIOL, V11, P1169, DOI 10.1089/cmb.2004.11.1169; Barash D, 2004, BIOINFORMATICS, V20, P1861, DOI 10.1093/bioinformatics/bth157; Barash D, 2003, LECT NOTES COMPUT SC, V2695…	82	0	0	1	3	PUBLIC LIBRARY SCIENCE	SAN FRANCISCO	1160 BATTERY STREET, STE 100, SAN FRANCISCO, CA 94111 USA	1932-6203			PLOS ONE	PLoS One	2018-10-18	2016	11	10							e0164726	10.1371/journal.pone.0164726
J	Ripoll, DR; Khavrutskii, I; Wallqvist, A; Chaudhury, S				Ripoll, Daniel R.; Khavrutskii, Ilja; Wallqvist, Anders; Chaudhury, Sidhartha			Modeling the Role of Epitope Arrangement on Antibody Binding Stoichiometry in Flaviviruses	BIOPHYSICAL JOURNAL			English	Article							WEST-NILE-VIRUS; DENGUE VIRUS; MONOCLONAL-ANTIBODY; MEMBRANE-FUSION; CRYOELECTRON MICROSCOPY; MEDIATED NEUTRALIZATION; LOCALIZED ADSORPTION; STRUCTURAL INSIGHTS; SURFACE-PROTEINS; HIGHLY POTENT	Cryo-electron-microscopy (cryo-EM) structures of flaviviruses reveal significant variation in epitope occupancy across different monoclonal antibodies that have largely been attributed to epitope-level differences in conformation or accessibility that affect antibody binding. The consequences of these variations for macroscopic properties such as antibody binding and neutralization are the result…	Military Infectious Diseases Research Program of the U.S. Army Medical Research and Materiel Command; U.S. Department of Defense (DoD) High-Performance Computing Modernization Program	Support for this research was provided by the Military Infectious Diseases Research Program of the U.S. Army Medical Research and Materiel Command and the U.S. Department of Defense (DoD) High-Performance Computing Modernization Program.	ADAMCZYK Z, 1991, J COLLOID INTERF SCI, V146, P123, DOI 10.1016/0021-9797(91)90010-6; ADAMCZYK Z, 1990, J COLLOID INTERF SCI, V140, P123, DOI 10.1016/0021-9797(90)90329-M; ALTSCHUL SF, 1990, J MOL BIOL, V215, P403, DOI 10.1006/jmbi.1990.9999; Baschek JE, 2012, BMC BIOPHYS, V5, DOI 10.1186/2046-1682-5-22; Bentz J, 2000, BIOPHYS J, V78, P227; Berman HM, 2000, NUCLEIC ACIDS RES, V28, P235, DOI 10.10…	64	0	0	2	7	CELL PRESS	CAMBRIDGE	600 TECHNOLOGY SQUARE, 5TH FLOOR, CAMBRIDGE, MA 02139 USA	0006-3495	1542-0086		BIOPHYS J	Biophys. J.	2018-10-18	2016	111	8					1641	1654		10.1016/j.bpj.2016.09.003
J	Mandal, PK; Baptiste, B; d'Estaintot, BL; Kauffmann, B; Huc, I				Mandal, Pradeep K.; Baptiste, Benoit; d'Estaintot, Beatrice Langlois; Kauffmann, Brice; Huc, Ivan			Multivalent Interactions between an Aromatic Helical Foldamer and a DNA G-Quadruplex in the Solid State	CHEMBIOCHEM			English	Article						DNA ligands; DNA structures; foldamers; G-quadruplexes; solid-state interactions	ISLET AMYLOID POLYPEPTIDE; NOVA G-QUADRUPLEX; C-MYC PROMOTER; ALPHA-HELIX; OLIGOAMIDE-FOLDAMER; SMALL-MOLECULE; ANGSTROM RESOLUTION; LIGAND COMPLEX; KIT PROMOTER; PROTEIN	Quinoline-based oligoamide foldamers have been identified as a potent class of ligands for G-quadruplex DNA. Their helical structure is thought to target G-quadruplex loops or grooves and not G-tetrads. We report a co-crystal structure of the antiparallel hairpin dimeric DNA G-quadruplex (G(4)T(4)G(4))(2) with tetramer 1a helically folded oligo-quinolinecarboxamide bearing cationic side chainstha…	European Union's Seventh Framework Program through the European Research Council [ERC-2012-AdG-320892]	We thank the European Synchrotron Radiation Facility for providing access to data collection facilities, and are grateful to the beamline staff of the French beamline for Investigation of Proteins (FIP) for assistance. This work was supported by the European Union's Seventh Framework Program through the European Research Council (grant agreement no. ERC-2012-AdG-320892, postdoctoral fellowship to…	Agrawal P, 2014, J AM CHEM SOC, V136, P1750, DOI 10.1021/ja4118945; Azzarito V, 2015, CHEM SCI, V6, P2434, DOI 10.1039/c4sc03559c; Bando T, 2006, ACCOUNTS CHEM RES, V39, P935, DOI 10.1021/ar030287f; Barros S. A., 2014, ANGEW CHEM, V126, P13966; Barros SA, 2014, ANGEW CHEM INT EDIT, V53, P13746, DOI 10.1002/anie.201407061; Bejugam M, 2010, ACS MED CHEM LETT, V1, P306, DOI 10.1021/ml100062z; Berman…	84	3	3	2	20	WILEY-V C H VERLAG GMBH	WEINHEIM	POSTFACH 101161, 69451 WEINHEIM, GERMANY	1439-4227	1439-7633		CHEMBIOCHEM	ChemBioChem	2018-10-17	2016	17	20					1911	1914		10.1002/cbic.201600281
J	Jacquin, H; Rancon, A				Jacquin, Hugo; Rancon, A.			Resummed mean-field inference for strongly coupled data	PHYSICAL REVIEW E			English	Article							BOLTZMANN MACHINES; MODEL; CONTACTS; EQUATION; MATRICES	We present a resummed mean-field approximation for inferring the parameters of an Ising or a Potts model from empirical, noisy, one- and two-point correlation functions. Based on a resummation of a class of diagrams of the small correlation expansion of the log-likelihood, the method outperforms standard mean-field inference methods, even when they are regularized. The inference is stable with re…	Agence Nationale de la Recherche [ANR-13-BS04-0012-01]; Laboratoire de Physique Statistique de l'Ecole Normale Superieure de Paris; ANR "ArtiQ" project	H.J. was funded by the Agence Nationale de la Recherche Coevstat project (Grant No. ANR-13-BS04-0012-01) in early stages of this work, and acknowledges support from the Laboratoire de Physique Statistique de l'Ecole Normale Superieure de Paris. A.R. was funded by ANR "ArtiQ" project. We thank C. K. Fisher and U. Ferrari for stimulating discussions, F. Krzakala and R. Monasson for important sugges…	ACKLEY DH, 1985, COGNITIVE SCI, V9, P147; Allez R, 2013, J PHYS A-MATH THEOR, V46, DOI 10.1088/1751-8113/46/1/015001; Amari S, 1998, NEURAL COMPUT, V10, P251, DOI 10.1162/089976698300017746; Amari S. I., 2016, INFORM GEOMETRY ITS; Andreatta M., 2013, ARXIV13111301; Aurell E, 2012, PHYS REV LETT, V108, DOI 10.1103/PhysRevLett.108.090201; Baldassi C, 2014, PLOS ONE, V9, DOI 10.1371/journal.pone.009…	66	1	1	1	1	AMER PHYSICAL SOC	COLLEGE PK	ONE PHYSICS ELLIPSE, COLLEGE PK, MD 20740-3844 USA	2470-0045	2470-0053		PHYS REV E	Phys. Rev. E	2018-10-17	2016	94	4							42118	10.1103/PhysRevE.94.042118
J	Gathiaka, S; Boykin, B; Caceres, T; Hevel, JM; Acevedo, O				Gathiaka, Symon; Boykin, Brittany; Caceres, Tamar; Hevel, Joan M.; Acevedo, Orlando			Understanding protein arginine methyltransferase 1 (PRMT1) product specificity from molecular dynamics	BIOORGANIC & MEDICINAL CHEMISTRY			English	Article						Protein arginine methyltransferases; Molecular dynamics; Posttranslational methylation; Computational; Mutagenesis	TRANSCRIPTIONAL COACTIVATOR; ANDROGEN RECEPTOR; HISTONE H4; METHYLATION; BINDING; AMBER; SIMULATIONS; MECHANISM; CATALYSIS; INSIGHTS	Protein arginine methyltransferases (PRMTs) catalyze the post-translational methylation of specific arginyl groups within targeted proteins to regulate fundamental biological responses in eukaryotic cells. The major Type I PRMT enzyme, PRMT1, strictly generates monomethyl arginine (MMA) and asymmetric dimethylarginine (ADMA), but not symmetric dimethylarginine (SDMA). Multiple diseases can arise …	National Science Foundation [CHE-1626860, CHE-1412358, CHE-1412405]; Auburn University; Alabama Supercomputer Center	Gratitude is expressed to the National Science Foundation (CHE-1626860, CHE-1412358 to O.A. and CHE-1412405 to J.M.H.), Auburn University, and the Alabama Supercomputer Center for support of this research. This article is dedicated to Bill Jorgensen for his continued mentorship and friendship.	Altschul SF, 1997, NUCLEIC ACIDS RES, V25, P3389, DOI 10.1093/nar/25.17.3389; Bachand F, 2007, EUKARYOT CELL, V6, P889, DOI 10.1128/EC.00099-07; Batut J, 2011, PLOS ONE, V6, DOI 10.1371/journal.pone.0025427; Bedford MT, 2009, MOL CELL, V33, P1, DOI 10.1016/j.molcel.2008.12.013; Berman HM, 2000, NUCLEIC ACIDS RES, V28, P235, DOI 10.1093/nar/28.1.235; Blackwell E, 2012, MOL REPROD DEV, V79, P163, D…	54	1	1	4	12	PERGAMON-ELSEVIER SCIENCE LTD	OXFORD	THE BOULEVARD, LANGFORD LANE, KIDLINGTON, OXFORD OX5 1GB, ENGLAND	0968-0896	1464-3391		BIOORGAN MED CHEM	Bioorg. Med. Chem.	2018-10-15	2016	24	20					4949	4960		10.1016/j.bmc.2016.08.009
J	Tikariha, H; Pal, RR; Qureshi, A; Kapley, A; Purohit, HJ				Tikariha, Hitesh; Pal, Rajesh Ramavadh; Qureshi, Asifa; Kapley, Atya; Purohit, Hemant J.			In silico analysis for prediction of degradative capacity of Pseudomonas putida SF1	GENE			English	Article						Pseudomonas putida SF1; p-nitrophenol degradation; Genome sequencing; Catabolic gene annotation	SP STRAIN WBC-3; PROTEIN-LIGAND DOCKING; P-NITROPHENOL; PHYLOGENETIC TREES; ARTHROBACTER SP; BINDING SITES; TOOL; MONOOXYGENASE; GENERATION; CATALYZES	The study employs draft genome sequence data to explore p-nitrophenol (PNP) degradation activity of Pseudomonas putida strain SF-1 at a genomic scale. Annotation analysis proposes that the strain SF1 not only possesses the gene cluster for PNP utilization but also for the utilization of benzoate, catechol, hydroxybenzoate, protocatechuate, and homogentisate. Further, the analysis was carried out …	Junior Research Fellowship (JRF) from University Grants Commission (UGC) of India; Senior Research Fellowship (SRF) from University Grants Commission (UGC) of India; CSIR network project [ESC108]	Mr. Hitesh Tikariha and Mr. Rajesh Pal acknowledge the Junior Research Fellowship (JRF) and Senior Research Fellowship (SRF) respectively from the University Grants Commission (UGC) of India for carrying out their work. Grant from CSIR network project ESC108 is also fully acknowledged.	Altschul SF, 1997, NUCLEIC ACIDS RES, V25, P3389, DOI 10.1093/nar/25.17.3389; ALTSCHUL SF, 1990, J MOL BIOL, V215, P403, DOI 10.1006/jmbi.1990.9999; Berman HM, 2000, NUCLEIC ACIDS RES, V28, P235, DOI 10.1093/nar/28.1.235; DeLano W, 2002, PYMOL MOL GRAPHICS S; Efron B, 1996, P NATL ACAD SCI USA, V93, P7085, DOI 10.1073/pnas.93.14.7085; Grant JR, 2008, NUCLEIC ACIDS RES, V36, pW181, DOI 10.1093/nar…	47	0	0	2	14	ELSEVIER SCIENCE BV	AMSTERDAM	PO BOX 211, 1000 AE AMSTERDAM, NETHERLANDS	0378-1119	1879-0038		GENE	Gene	2018-10-15	2016	591	2					382	392		10.1016/j.gene.2016.06.028
J	Delaveau, T; Davoine, D; Jolly, A; Vallot, A; Rouviere, JO; Gerber, A; Brochet, S; Plessis, M; Roquigny, R; Merhej, J; Leger, T; Garcia, C; Lelandais, G; Laine, E; Palancade, B; Devaux, F; Garcia, M				Delaveau, Thierry; Davoine, Dimitri; Jolly, Ariane; Vallot, Antoine; Rouviere, Jerome O.; Gerber, Athenais; Brochet, Sandra; Plessis, Marion; Roquigny, Roxane; Merhej, Jawad; Leger, Thibaut; Garcia, Camille; Lelandais, Gaelle; Laine, Elodie; Palancade, Benoit; Devaux, Frederic; Garcia, Mathilde			Tma108, a putative M1 aminopeptidase, is a specific nascent chain-associated protein in Saccharomyces cerevisiae	NUCLEIC ACIDS RESEARCH			English	Article							MESSENGER-RNA; QUALITY-CONTROL; SPECIALIZED RIBOSOMES; ESCHERICHIA-COLI; ACTIVE-SITE; YEAST; MITOCHONDRIA; COMPLEXES; LOCALIZATION; TRANSLATION	The discovery of novel specific ribosome-associated factors challenges the assumption that translation relies on standardized molecular machinery. In this work, we demonstrate that Tma108, an uncharacterized translation machinery-associated factor in yeast, defines a subpopulation of cellular ribosomes specifically involved in the translation of less than 200 mRNAs encoding proteins with ATP or Z…	IBPS (Institut de Biologie Paris Seine); STRUDYEV project of the Agence Nationale pour la Recherche [ANR-10-JCJC-1603]; IBPS	IBPS (Institut de Biologie Paris Seine); STRUDYEV project (ANR-10-JCJC-1603) of the Agence Nationale pour la Recherche. Funding for open access charge: IBPS.	Adams DR, 2011, CELL COMMUN SIGNAL, V9, DOI 10.1186/1478-811X-9-22; Addlagatta A, 2008, BIOCHEMISTRY-US, V47, P5303, DOI 10.1021/bi7022333; Berman HM, 2000, NUCLEIC ACIDS RES, V28, P235, DOI 10.1093/nar/28.1.235; Boyle EI, 2004, BIOINFORMATICS, V20, P3710, DOI 10.1093/bioinformatics/bth456; Cadel S, 2015, BIOCHIMIE, V109, P67, DOI 10.1016/j.biochi.2014.12.009; del Alamo M, 2011, PLOS BIOL, V9, DO…	53	1	1	1	1	OXFORD UNIV PRESS	OXFORD	GREAT CLARENDON ST, OXFORD OX2 6DP, ENGLAND	0305-1048	1362-4962		NUCLEIC ACIDS RES	Nucleic Acids Res.	2018-10-14	2016	44	18					8826	8841		10.1093/nar/gkw732
J	Smith, CA; Nossoni, Z; Toth, M; Stewart, NK; Frase, H; Vakulenko, SB				Smith, Clyde A.; Nossoni, Zahra; Toth, Marta; Stewart, Nichole K.; Frase, Hilary; Vakulenko, Sergei B.			Role of the Conserved Disulfide Bridge in Class A Carbapenemases	JOURNAL OF BIOLOGICAL CHEMISTRY			English	Article						antibiotic resistance; crystal structure; disulfide; enzyme kinetics; hydrogen bond; carbapenemase; enzyme stability	SPECTRUM BETA-LACTAMASES; ESCHERICHIA-COLI; STRUCTURAL BASIS; ACTIVE-SITE; RESOLUTION; CRYSTALLOGRAPHY; RESISTANCE; ENTEROBACTERIACEAE; CEPHALOSPORINASE; REQUIREMENTS	Some members of the class A -lactamase family are capable of conferring resistance to the last resort antibiotics, carbapenems. A unique structural feature of these clinically important enzymes, collectively referred to as class A carbapenemases, is a disulfide bridge between invariant Cys(69) and Cys(238) residues. It was proposed that this conserved disulfide bridge is responsible for their car…	National Institutes of Health [R01AI089726]; Department of Energy Office of Biological and Environmental Research; National Institutes of Health, National Institute of General Medical Sciences [P41GM103393]	This work was supported by National Institutes of Health Grant R01AI089726 (to S. B. V.). The SSRL Structural Molecular Biology Program is supported by the Department of Energy Office of Biological and Environmental Research and by the National Institutes of Health, National Institute of General Medical Sciences (including Grant P41GM103393). The authors declare that they have no conflicts of int…	ABAGYAN R, 1994, J MOL BIOL, V235, P983, DOI 10.1006/jmbi.1994.1052; Adams PD, 2010, ACTA CRYSTALLOGR D, V66, P213, DOI 10.1107/S0907444909052925; AMBLER RP, 1980, PHILOS T ROY SOC B, V289, P321, DOI 10.1098/rstb.1980.0049; AMBLER RP, 1991, BIOCHEM J, V276, P269; An JH, 2005, MOL CELL PROTEOMICS, V4, P752, DOI 10.1074/mcp.M400159-MCP200; Berman HM, 2000, NUCLEIC ACIDS RES, V28, P235, DOI 10.1093/…	42	1	1	3	9	AMER SOC BIOCHEMISTRY MOLECULAR BIOLOGY INC	BETHESDA	9650 ROCKVILLE PIKE, BETHESDA, MD 20814-3996 USA	0021-9258	1083-351X		J BIOL CHEM	J. Biol. Chem.	2018-10-14	2016	291	42					22196	22206		10.1074/jbc.M116.749648
J	Marshall, JD; Heeke, DS; Rao, E; Maynard, SK; Hornigold, D; McCrae, C; Fraser, N; Tovchigrechko, A; Yu, L; Williams, N; King, S; Cooper, ME; Hajjar, AM; Woo, JC				Marshall, Jason D.; Heeke, Darren S.; Rao, Eileen; Maynard, Sean K.; Hornigold, David; McCrae, Christopher; Fraser, Neil; Tovchigrechko, Andrey; Yu, Li; Williams, Nicola; King, Sarah; Cooper, Martin E.; Hajjar, Adeline M.; Woo, Jennifer C.			A Novel Class of Small Molecule Agonists with Preference for Human over Mouse TLR4 Activation	PLOS ONE			English	Article							RECEPTOR 7 AGONISTS; VACCINE ADJUVANT; STRUCTURAL BASIS; LIPID-A; TOLL; TOLL-LIKE-RECEPTOR-4; LPS; DERIVATIVES; LIGANDS; CELLS	The best-characterized Toll-like receptor 4 (TLR4) ligands are lipopolysaccharide (LPS) and its chemically modified and detoxified variant, monophosphoryl lipid A (MPL). Although both molecules are active for human TLR4, they demonstrate a potency preference for mouse TLR4 based on data from transfected cell lines and primary cells of both species. After a high throughput screening process of sma…	MedImmune; global biologics R&D arm of AstraZeneca	This study was sponsored/funded by MedImmune, the global biologics R&D arm of AstraZeneca. The funder provided support in the form of salaries for authors JDM, DSH, ER, SKM, DH, CM, NF, AT, LY, NW, SK, MEC, and JCW, but did not have any additional role in the study design, data collection and analysis, decision to publish, or preparation of the manuscript. The specific roles of these authors are …	Behzad H, 2012, J INFECT DIS, V205, P466, DOI 10.1093/infdis/jir769; Berman HM, 2000, NUCLEIC ACIDS RES, V28, P235, DOI 10.1093/nar/28.1.235; Boelsterli UA, 2006, CURR DRUG METAB, V7, P715, DOI 10.2174/138920006778520606; Chan M, 2013, J MED CHEM; Coler RN, 2011, PLOS ONE, V6, DOI 10.1371/journal.pone.0016333; De Temmerman ML, 2011, DRUG DISCOV TODAY, V16, P569, DOI 10.1016/j.drudis.2011.04.006; …	51	1	1	3	7	PUBLIC LIBRARY SCIENCE	SAN FRANCISCO	1160 BATTERY STREET, STE 100, SAN FRANCISCO, CA 94111 USA	1932-6203			PLOS ONE	PLoS One	2018-10-13	2016	11	10							e0164632	10.1371/journal.pone.0164632
J	Rackelmann, N; Matter, H; Englert, H; Follmann, M; Maier, T; Weston, J; Arndt, P; Heyse, W; Mertsch, K; Wirth, K; Bialy, L				Rackelmann, Nils; Matter, Hans; Englert, Heinrich; Follmann, Markus; Maier, Thomas; Weston, John; Arndt, Petra; Heyse, Winfried; Mertsch, Katharina; Wirth, Klaus; Bialy, Laurent			Discovery and Optimization of 1-Phenoxy-2-aminoindanes as Potent, Selective, and Orally Bioavailable Inhibitors of the Na+/H+ Exchanger Type 3 (NHE3)	JOURNAL OF MEDICINAL CHEMISTRY			English	Article							DRUG-DRUG INTERACTIONS; ATOMIC PHYSICOCHEMICAL PARAMETERS; DIRECTED QUANTITATIVE STRUCTURE; PARTIAL LEAST-SQUARES; MOLECULAR-SURFACES; CARDIAC ISCHEMIA; NUCLEIC-ACIDS; CACO-2 CELLS; SLEEP-APNEA; IN-VITRO	The design, synthesis, and structure activity relationship of 1-phenoxy-2-aminoindanes as inhibitors of the Na+/H+ exchanger type 3 (NHE3) are described based on a hit from high-throughput screening (HTS). The chemical optimization resulted in the discovery of potent, selective, and orally bioavailable NHE3 inhibitors with 13d as best compound, showing high in vitro permeability and lacking CYP2D…	silico ADMET all from Sanofi	We gratefully acknowledge discussions with R. Jager and support with in silico ADMET modeling by C. Giegerich and K.F. Schmidt (all from Sanofi).	Abu-Shaweesh JM, 2002, PEDIATR RES, V52, DOI 10.1203/01.PDR.0000025348.51241.D8; ARTURSSON P, 1991, BIOCHEM BIOPH RES CO, V175, P880, DOI 10.1016/0006-291X(91)91647-U; ARTURSSON P, 1990, J PHARM SCI, V79, P476, DOI 10.1002/jps.2600790604; Baringhaus K.-H., 2014, CHEMOINFORMATICS DRU, P245; Berman HM, 2000, NUCLEIC ACIDS RES, V28, P235, DOI 10.1093/nar/28.1.235; BERNSTEIN FC, 1977, J MOL BIOL, V11…	89	0	0	3	8	AMER CHEMICAL SOC	WASHINGTON	1155 16TH ST, NW, WASHINGTON, DC 20036 USA	0022-2623	1520-4804		J MED CHEM	J. Med. Chem.	2018-10-13	2016	59	19					8812	8829		10.1021/acs.jmedchem.6b00624
J	Zhang, H; Lim, HS; Knapp, B; Deane, CM; Aleksic, M; Dushek, O; van der Merwe, PA				Zhang, Hao; Lim, Hong-Sheng; Knapp, Berhard; Deane, Charlotte M.; Aleksic, Milos; Dushek, Omer; van der Merwe, P. Anton			The contribution of major histocompatibility complex contacts to the affinity and kinetics of T cell receptor binding	SCIENTIFIC REPORTS			English	Article							ALANINE-SCANNING MUTAGENESIS; PEPTIDE-MHC; ANTIGEN RECOGNITION; CROSS-REACTIVITY; STRUCTURAL BASIS; SPECIFICITY; INTERFACE; MOLECULES; MECHANISM; PROTEINS	The interaction between the T cell antigen receptor (TCR) and antigenic peptide in complex with major histocompatibility complex (MHC) molecules is a crucial step in T cell activation. The relative contributions of TCR: peptide and TCR: MHC contacts to the overall binding energy remain unclear. This has important implications for our understanding of T cell development and function. In this study…	Cancer Research UK [C19634/A6659, C19634/A12336]; EPA Research Trust; Clarendon Fund; EPA Research-Fund; Wellcome Trust [101799/Z/13/Z]; Sir Henry Dale Fellowship - Wellcome Trust; Royal Society [098363]	This work was supported by grants from the Cancer Research UK (C19634/A6659 & C19634/A12336) and EPA Research Trust to PAvdM, and studentships from the Clarendon Fund and the EPA Research-Fund to H. Z. and H.-S.L. PAvdM is supported by a Wellcome Trust Senior Investigator Award (101799/Z/13/Z). OD is supported by a Sir Henry Dale Fellowship jointly funded by the Wellcome Trust and the Royal Socie…	Armstrong KM, 2008, J MOL RECOGNIT, V21, P275, DOI 10.1002/jmr.896; Baker BM, 2001, J EXP MED, V193, P551, DOI 10.1084/jem.193.5.551; Baker BM, 2012, IMMUNOL REV, V250, P10, DOI 10.1111/j.1600-065X.2012.01165.x; Berendsen H. J. C., 1981, INTERMOLECULAR FORCE, V31, P331, DOI [10.1007/978-94-015-7658-1, DOI 10.1007/978-94-015-7658-1_21]; Beringer DX, 2015, NAT IMMUNOL, V16, P1153, DOI 10.1038/ni.32…	38	1	1	0	4	NATURE PUBLISHING GROUP	LONDON	MACMILLAN BUILDING, 4 CRINAN ST, LONDON N1 9XW, ENGLAND	2045-2322			SCI REP-UK	Sci Rep	2018-10-13	2016	6								35326	10.1038/srep35326
J	Polonelli, L; Ciociola, T; Elviri, L; Zanello, PP; Giovati, L; Arruda, DC; Munoz, JE; Mortara, RA; Morace, G; Borghi, E; Galati, S; Marin, O; Casoli, C; Pilotti, E; Ronzi, P; Travassos, LR; Magliani, W; Conti, S				Polonelli, Luciano; Ciociola, Tecla; Elviri, Lisa; Zanello, Pier Paolo; Giovati, Laura; Arruda, Denise C.; Munoz, Julian E.; Mortara, Renato A.; Morace, Giulia; Borghi, Elisa; Galati, Serena; Marin, Oriano; Casoli, Claudio; Pilotti, Elisabetta; Ronzi, Paola; Travassos, Luiz R.; Magliani, Walter; Conti, Stefania			A Naturally Occurring Antibody Fragment Neutralizes Infectivity of Diverse Infectious Agents	SCIENTIFIC REPORTS			English	Article							DETERMINING REGIONS CDRS; IGM ANTIBODIES; POSTTRANSLATIONAL MODIFICATIONS; GALLERIA-MELLONELLA; APOPTOTIC CELLS; INNATE IMMUNITY; PEPTIDES; PHOSPHORYLATION; PROTEINS; BINDING	A phosphorylated peptide, named K40H, derived from the constant region of IgMs was detected in human serum by liquid chromatography coupled to high-resolution mass spectrometry. Synthetic K40H proved to exert a potent in vitro activity against fungal pathogens, and to inhibit HIV-1 replication in vitro and ex vivo. It also showed a therapeutic effect against an experimental infection by Candida a…			Anderson R., 2012, CONTINUING MED ED, V30, P273; Arruda DC, 2012, J BIOL CHEM, V287, P14912, DOI 10.1074/jbc.M111.322362; Assis DM, 2015, BIOCHEM PHARMACOL, V97, P203, DOI 10.1016/j.bcp.2015.07.033; Autelitano DJ, 2006, DRUG DISCOV TODAY, V11, P306, DOI 10.1016/j.drudis.2006.02.003; Berman HM, 2000, NUCLEIC ACIDS RES, V28, P235, DOI 10.1093/nar/28.1.235; Carpino LA, 2001, J ORG CHEM, V66, P5245, …	36	2	2	2	5	NATURE PUBLISHING GROUP	LONDON	MACMILLAN BUILDING, 4 CRINAN ST, LONDON N1 9XW, ENGLAND	2045-2322			SCI REP-UK	Sci Rep	2018-10-11	2016	6								35018	10.1038/srep35018
J	Gupta, SK; Gross, R; Dandekar, T				Gupta, Shishir K.; Gross, Roy; Dandekar, Thomas			An antibiotic target ranking and prioritization pipeline combining sequence, structure and network-based approaches exemplified for Serratia marcescens	GENE			English	Article						Lead; Compound; 3D structure; Homology; Pharmacological target; Nosocomial infections; Anti-microbial resistance; Protein-protein interaction; Network analysis	PROTEIN-INTERACTION NETWORK; CELL-DIVISION PROTEIN; DRUG-TARGETS; PSEUDOMONAS-AERUGINOSA; SUBCELLULAR-LOCALIZATION; ANTIBACTERIAL TARGETS; COMPARATIVE GENOMICS; MICROBIAL GENOMES; ALANINE RACEMASE; ESSENTIAL GENES	We investigate a drug target screening pipeline comparing sequence, structure and network-based criteria for prioritization. Serratia marcescens, an opportunistic pathogen, serves as test case. We rank according to (i) availability of three dimensional structures and lead compounds, (ii) not occurring in man and general sequence conservation information, and (iii) network information on the impor…	German Research Society (DFG) [TR 124/B2]	SKG would like to thank Anthony J. Chubb (University College Dublin) for help and useful discussions on the RhumPDB score. Funding by German Research Society (DFG) is gratefully acknowledged (TR 124/B2).	Aguero F, 2008, NAT REV DRUG DISCOV, V7, P900, DOI 10.1038/nrd2684; ALTSCHUL SF, 1990, J MOL BIOL, V215, P403, DOI 10.1006/jmbi.1990.9999; An G, 2011, DRUG DEVELOP RES, V72, P187, DOI 10.1002/ddr.20415; Aucken HM, 1998, J MED MICROBIOL, V47, P1105; Awasthy D, 2012, MICROBIOL-SGM, V158, P319, DOI 10.1099/mic.0.054064-0; Baba T, 2006, MOL SYST BIOL, V2, DOI 10.1038/msb4100050; Badger J, 2012, ACTA …	104	0	0	2	44	ELSEVIER SCIENCE BV	AMSTERDAM	PO BOX 211, 1000 AE AMSTERDAM, NETHERLANDS	0378-1119	1879-0038		GENE	Gene	2018-10-10	2016	591	1					268	278		10.1016/j.gene.2016.07.030
J	Goldberg, T; Rost, B; Bromberg, Y				Goldberg, Tatyana; Rost, Burkhard; Bromberg, Yana			Computational prediction shines light on type III secretion origins	SCIENTIFIC REPORTS			English	Article							BACTERIAL TYPE-III; GRAM-NEGATIVE BACTERIA; PSEUDOMONAS-SYRINGAE; MYXOCOCCUS-XANTHUS; PROTEIN SECRETION; SYSTEM EFFECTORS; DATABASE; PLANT; ANNOTATION; PATHOGENS	Type III secretion system is a key bacterial symbiosis and pathogenicity mechanism responsible for a variety of infectious diseases, ranging from food-borne illnesses to the bubonic plague. In many Gram-negative bacteria, the type III secretion system transports effector proteins into host cells, converting resources to bacterial advantage. Here we introduce a computational method that identifies…	Alexander von Humboldt foundation through the German Ministry for Research and Education (BMBF: Bundesministerium fuer Bildung und Forschung); Ernst Ludwig Ehrlich Studienwerk (ELES); NSF [1553289]; NIH [U01 GM115486]; USDA-NIFA [1015:0228906]; Technische Universitat Munchen - Institute for Advanced Study Hans Fischer Fellowship - German Excellence Initiative; European Union Seventh Framework Pro…	Thanks to Tim Karl, Guy Yachdav, Laszlo Kajan (all TUM) and Yannick Mahlich (Rutgers) for invaluable help with hardware and software; to Chengsheng Zhu (Rutgers) for helpful discussions; to Jessie Maguire (Rutgers), Marlena Drabik, Inga Weise and Lothar Richter (all TUM) for administrative support. Last, not least, thanks to all those who deposit their experimental data in public databases, and t…	Altschul SF, 1997, NUCLEIC ACIDS RES, V25, P3389, DOI 10.1093/nar/25.17.3389; Angot A, 2007, PLOS PATHOG, V3, P1, DOI 10.1371/journal.ppat.0030003; Apweiler R, 2012, NUCLEIC ACIDS RES, V40, pD71, DOI 10.1093/nar/gkr981; Arnold R, 2009, PLOS PATHOG, V5, DOI 10.1371/journal.ppat.1000376; Bairoch A, 2000, NUCLEIC ACIDS RES, V28, P45, DOI 10.1093/nar/28.1.45; Berman HM, 2000, NUCLEIC ACIDS RES, V28, …	52	1	1	3	3	NATURE PUBLISHING GROUP	LONDON	MACMILLAN BUILDING, 4 CRINAN ST, LONDON N1 9XW, ENGLAND	2045-2322			SCI REP-UK	Sci Rep	2018-10-07	2016	6								34516	10.1038/srep34516
J	Jerath, G; Hazam, PK; Shekhar, S; Ramakrishnan, V				Jerath, Gaurav; Hazam, Prakash Kishore; Shekhar, Shashi; Ramakrishnan, Vibin			Mapping the Geometric Evolution of Protein Folding Motor	PLOS ONE			English	Article							ACID SUBSTITUTION MATRICES; DESIGN; PATHWAYS; DATABASE; SIMULATION; STABILITY; KINETICS; HAIRPIN	Polypeptide chain has an invariant main-chain and a variant side-chain sequence. How the side-chain sequence determines fold in terms of its chemical constitution has been scrutinized extensively and verified periodically. However, a focussed investigation on the directive effect of side-chain geometry may provide important insights supplementing existing algorithms in mapping the geometrical evo…	Department of Biotechnology, Govt. of India [BT/350/NE/TBP/2012]; Indian Institute of Technology Guwahati, India	This study was jointly funded by Department of Biotechnology, Govt. of India (Grant number: BT/350/NE/TBP/2012), and Indian Institute of Technology Guwahati, India. The funders had no role in study design, data collection and analysis, decision to publish, or preparation of the manuscript.	ANFINSEN CB, 1973, SCIENCE, V181, P223, DOI 10.1126/science.181.4096.223; Baker D, 2001, SCIENCE, V294, P93, DOI 10.1126/science.1065659; Beauchamp KA, 2012, P NATL ACAD SCI USA, V109, P17807, DOI 10.1073/pnas.1201810109; Berman HM, 2000, NUCLEIC ACIDS RES, V28, P235, DOI 10.1093/nar/28.1.235; Bogatyreva NS, 2009, NUCLEIC ACIDS RES, V37, pD342, DOI 10.1093/nar/gkn696; Chakrabarti P, 2001, PROG BI…	31	1	1	0	1	PUBLIC LIBRARY SCIENCE	SAN FRANCISCO	1160 BATTERY STREET, STE 100, SAN FRANCISCO, CA 94111 USA	1932-6203			PLOS ONE	PLoS One	2018-10-07	2016	11	10							e0163993	10.1371/journal.pone.0163993
J	Mazmanian, K; Sargsyan, K; Grauffel, C; Dudev, T; Lim, C				Mazmanian, Karine; Sargsyan, Karen; Grauffel, Cedric; Dudev, Todor; Lim, Carmay			Preferred Hydrogen-Bonding Partners of Cysteine: Implications for Regulating Cys Functions	JOURNAL OF PHYSICAL CHEMISTRY B			English	Article							ACID SIDE-CHAINS; DENSITY FUNCTIONALS; CRYSTAL-STRUCTURES; PROTEIN FUNCTION; SOLVENT WATER; FREE-ENERGIES; MODEL SYSTEM; SULFUR-ATOMS; GAS-PHASE; PREDICTION	The hydrogen-bonding interactions of cysteine, which can serve as a hydrogen-bond donor and/or acceptor, play a central role in cysteine's diverse functional roles in proteins. They affect the balance between the neutral thiol (SH) or thiolate (S-) and the charge distribution in the rate-limiting transition state of a reaction. Despite their importance, no study has determined the preferred hydro…	Academia Sinica, Taiwan [98-2113-M-001-011]; MOST, Taiwan [98-2113-M-001-011]	We thank Dr. Yu-Ming Lee for helpful comments. This work was supported by funds from Academia Sinica and MOST (Grant No. 98-2113-M-001-011), Taiwan.	Alecu IM, 2010, J CHEM THEORY COMPUT, V6, P2872, DOI 10.1021/ct100326h; Alongi KS, 2010, ANN REP COMP CHEM, V6, P113, DOI 10.1016/S1574-1400(10)06008-1; Antonijevic IS, 2016, CRYST GROWTH DES, V16, P632, DOI 10.1021/acs.cgd.5b01058; BAKER EN, 1984, PROG BIOPHYS MOL BIO, V44, P97, DOI 10.1016/0079-6107(84)90007-5; Barford D, 2004, CURR OPIN STRUC BIOL, V14, P679, DOI 10.1016/j.sbi.2004.09.012; Bar…	58	0	0	2	6	AMER CHEMICAL SOC	WASHINGTON	1155 16TH ST, NW, WASHINGTON, DC 20036 USA	1520-6106			J PHYS CHEM B	J. Phys. Chem. B	2018-10-06	2016	120	39					10288	10296		10.1021/acs.jpcb.6b08109
J	Ghosh, S; Chakrabarti, R				Ghosh, Soumadwip; Chakrabarti, Rajarshi			Unzipping of Double-Stranded Ribonucleic Acids by Graphene and Single-Walled Carbon Nanotube: Helix Geometry versus Surface Curvature	JOURNAL OF PHYSICAL CHEMISTRY C			English	Article							SMALL INTERFERING RNA; GENE DELIVERY VECTORS; NUCLEIC-ACID; MOLECULAR-DYNAMICS; SALT CONCENTRATION; FREE-ENERGY; SELECTIVE DISPERSION; PAIRING PROPERTIES; HIGHLY EFFICIENT; GLYCINE-BETAINE	Using atomistic molecular dynamics simulations, we report graphene-assisted spontaneous unzipping of a novel duplex ribonucleic acid analogue xylonucleic acid (XNA) at physiologically relevant temperatures and salt concentrations. Our simulations for the first time confirm that XNA, having a near-orthogonal neucleobase pairing arrangement and a severely strained phosphate backbone, undergoes fast…	SERB [SB/SI/PC-55/2013]; CSIR [01(2781)/14/EMR-II]; IIT Bombay-IRCC [12IRCCSG046]; CSIR, Govt. of India	R.C. acknowledges SERB (SB/SI/PC-55/2013), CSIR (Project No. 01(2781)/14/EMR-II), and IIT Bombay-IRCC (Grant number: 12IRCCSG046) for financial support. S.G. acknowledges Mr. Jaladhar Mahato for his help during image processing and making of videos. S.G. also thanks CSIR, Govt. of India, for a senior research fellowship.	Allen M. P., 1987, COMPUTER SIMULATION; Amirani MC, 2015, J BIOMOL STRUCT DYN, V33, P1567, DOI 10.1080/07391102.2014.954315; ANDERSEN HC, 1983, J COMPUT PHYS, V52, P24, DOI 10.1016/0021-9991(83)90014-1; Antony J, 2008, PHYS CHEM CHEM PHYS, V10, P2722, DOI 10.1039/b718788b; Appella DH, 2009, CURR OPIN CHEM BIOL, V13, P687, DOI 10.1016/j.cbpa.2009.09.030; Balamurugan K, 2013, J PHYS CHEM C, V117, P…	103	2	2	1	17	AMER CHEMICAL SOC	WASHINGTON	1155 16TH ST, NW, WASHINGTON, DC 20036 USA	1932-7447			J PHYS CHEM C	J. Phys. Chem. C	2018-10-06	2016	120	39					22681	22693		10.1021/acs.jpcc.6b06943
J	Capelli, D; Cerchia, C; Montanari, R; Loiodice, F; Tortorella, P; Laghezza, A; Cervoni, L; Pochetti, G; Lavecchia, A				Capelli, Davide; Cerchia, Carmen; Montanari, Roberta; Loiodice, Fulvio; Tortorella, Paolo; Laghezza, Antonio; Cervoni, Laura; Pochetti, Giorgio; Lavecchia, Antonio			Structural basis for PPAR partial or full activation revealed by a novel ligand binding mode	SCIENTIFIC REPORTS			English	Article							DUAL-SPECIFICITY PHOSPHATASES; CANCER-CELL INVASION; RECEPTOR-GAMMA; BIOLOGICAL EVALUATION; ALPHA/GAMMA AGONISTS; NUCLEAR RECEPTORS; ACCURATE DOCKING; ALPHA ACTIVATION; GENE-EXPRESSION; DRUG DISCOVERY	The peroxisome proliferator-activated receptors (PPARs) are nuclear receptors involved in the regulation of the metabolic homeostasis and therefore represent valuable therapeutic targets for the treatment of metabolic diseases. The development of more balanced drugs interacting with PPARs, devoid of the side-effects showed by the currently marketed PPAR gamma full agonists, is considered the majo…	Italian MIUR (Ministry for the University and Research) PRIN [2010W7YRLZ_003]	The present study has been supported by a grant of Italian MIUR (Ministry for the University and Research) PRIN 2010-2011 (prot. 2010W7YRLZ_003) to A.L. We would like to thank the Biocrystal Facility at the CNR Institute of Biology and Molecular Pathology, La Sapienza University of Rome for the use of the Phoenix robot Art-Robbins robot for crystallization trials. We acknowledge the ESRF of Greno…	Adams PD, 2010, ACTA CRYSTALLOGR D, V66, P213, DOI 10.1107/S0907444909052925; Bain DL, 2007, ANNU REV PHYSIOL, V69, P201, DOI 10.1146/annurev.physiol.69.031905.160308; Battye TGG, 2011, ACTA CRYSTALLOGR D, V67, P271, DOI 10.1107/S0907444910048675; Berman HM, 2000, NUCLEIC ACIDS RES, V28, P235, DOI 10.1093/nar/28.1.235; Bernardes A, 2013, J MOL BIOL, V425, P2878, DOI 10.1016/j.jmb.2013.05.010; Bru…	55	0	0	1	7	NATURE PUBLISHING GROUP	LONDON	MACMILLAN BUILDING, 4 CRINAN ST, LONDON N1 9XW, ENGLAND	2045-2322			SCI REP-UK	Sci Rep	2018-10-06	2016	6								34792	10.1038/srep34792
J	Capelli, D; Cerchia, C; Montanari, R; Loiodice, F; Tortorella, P; Laghezza, A; Cervoni, L; Pochetti, G; Lavecchia, A				Capelli, Davide; Cerchia, Carmen; Montanari, Roberta; Loiodice, Fulvio; Tortorella, Paolo; Laghezza, Antonio; Cervoni, Laura; Pochetti, Giorgio; Lavecchia, Antonio			Structural basis for PPAR partial or full activation revealed by a novel ligand binding mode	SCIENTIFIC REPORTS			English	Article							DUAL-SPECIFICITY PHOSPHATASES; CANCER-CELL INVASION; RECEPTOR-GAMMA; BIOLOGICAL EVALUATION; ALPHA/GAMMA AGONISTS; NUCLEAR RECEPTORS; ACCURATE DOCKING; ALPHA ACTIVATION; GENE-EXPRESSION; DRUG DISCOVERY	The peroxisome proliferator-activated receptors (PPARs) are nuclear receptors involved in the regulation of the metabolic homeostasis and therefore represent valuable therapeutic targets for the treatment of metabolic diseases. The development of more balanced drugs interacting with PPARs, devoid of the side-effects showed by the currently marketed PPAR gamma full agonists, is considered the majo…	Italian MIUR (Ministry for the University and Research) PRIN [2010W7YRLZ_003]	The present study has been supported by a grant of Italian MIUR (Ministry for the University and Research) PRIN 2010-2011 (prot. 2010W7YRLZ_003) to A.L. We would like to thank the Biocrystal Facility at the CNR Institute of Biology and Molecular Pathology, La Sapienza University of Rome for the use of the Phoenix robot Art-Robbins robot for crystallization trials. We acknowledge the ESRF of Greno…	Adams PD, 2010, ACTA CRYSTALLOGR D, V66, P213, DOI 10.1107/S0907444909052925; Bain DL, 2007, ANNU REV PHYSIOL, V69, P201, DOI 10.1146/annurev.physiol.69.031905.160308; Battye TGG, 2011, ACTA CRYSTALLOGR D, V67, P271, DOI 10.1107/S0907444910048675; Berman HM, 2000, NUCLEIC ACIDS RES, V28, P235, DOI 10.1093/nar/28.1.235; Bernardes A, 2013, J MOL BIOL, V425, P2878, DOI 10.1016/j.jmb.2013.05.010; Bru…	55	0	0	0	2	NATURE PUBLISHING GROUP	LONDON	MACMILLAN BUILDING, 4 CRINAN ST, LONDON N1 9XW, ENGLAND	2045-2322			SCI REP-UK	Sci Rep	2018-10-06	2016	6								34792	10.1038/srep34792
J	Li, FY; Li, C; Revote, J; Zhang, Y; Webb, GI; Li, J; Song, JN; Lithgow, T				Li, Fuyi; Li, Chen; Revote, Jerico; Zhang, Yang; Webb, Geoffrey I.; Li, Jian; Song, Jiangning; Lithgow, Trevor			GlycoMine(struct): a new bioinformatics tool for highly accurate mapping of the human N-linked and O-linked glycoproteomes by incorporating structural features	SCIENTIFIC REPORTS			English	Article							ALPHA-L-IDURONIDASE; LARGE GENE LISTS; B-CELL EPITOPES; PROTEIN GLYCOSYLATION; POSTTRANSLATIONAL MODIFICATIONS; PHOSPHORYLATION SITES; BIOLOGICAL SEQUENCES; MASS-SPECTROMETRY; RANDOM FORESTS; PREDICTION	Glycosylation plays an important role in cell-cell adhesion, ligand-binding and subcellular recognition. Current approaches for predicting protein glycosylation are primarily based on sequence-derived features, while little work has been done to systematically assess the importance of structural features to glycosylation prediction. Here, we propose a novel bioinformatics method called GlycoMine(…	National Health and Medical Research Council of Australia (NHMRC) [1092262]; National Natural Science Foundation of China [61202167, 61303169]; Hundred Talents Program of the Chinese Academy of Sciences (CAS); Discovery Outstanding Research Award (DORA) of the Australian Research Council (ARC); Hundred Talents Program of CAS	This work was supported by grants from the National Health and Medical Research Council of Australia (NHMRC) (1092262), National Natural Science Foundation of China (61202167, 61303169) and the Hundred Talents Program of the Chinese Academy of Sciences (CAS). GIW is a recipient of Discovery Outstanding Research Award (DORA) of the Australian Research Council (ARC). JS is a recipient of the Hundre…	Aebi M, 2013, BBA-MOL CELL RES, V1833, P2430, DOI 10.1016/j.bbamcr.2013.04.001; Aertgeerts K, 2004, PROTEIN SCI, V13, P145, DOI 10.1110/ps.03352504; Altschul SF, 1997, NUCLEIC ACIDS RES, V25, P3389, DOI 10.1093/nar/25.17.3389; Andersen PH, 2006, PROTEIN SCI, V15, P2558, DOI 10.1110/ps.062405906; Apweiler R, 1999, BBA-GEN SUBJECTS, V1473, P4, DOI 10.1016/S0304-4165(99)00165-8; Avanov A Ia, 1991, M…	96	2	2	3	16	NATURE PUBLISHING GROUP	LONDON	MACMILLAN BUILDING, 4 CRINAN ST, LONDON N1 9XW, ENGLAND	2045-2322			SCI REP-UK	Sci Rep	2018-10-06	2016	6								34595	10.1038/srep34595
J	Pei, L; Xu, M; Frazier, Z; Alber, F				Pei, Long; Xu, Min; Frazier, Zachary; Alber, Frank			Simulating cryo electron tomograms of crowded cell cytoplasm for assessment of automated particle picking	BMC BIOINFORMATICS			English	Article						Cryo-electron tomography; Particle picking; Macromolecular crowding; Visual proteomics	CRYOELECTRON TOMOGRAPHY; MICROSCOPY; CLASSIFICATION; CRYOTOMOGRAPHY; VISUALIZATION; PROTEOMICS; COMPLEXES; ALGORITHM; SELECTION; BIOLOGY	Background: Cryo-electron tomography is an important tool to study structures of macromolecular complexes in close to native states. A whole cell cryo electron tomogram contains structural information of all its macromolecular complexes. However, extracting this information remains challenging, and relies on sophisticated image processing, in particular for template-free particle extraction, clas…	NIH/NIGMS [R01GM096089]; Arnold and Mabel Beckman Foundation (BYI program); Pew Charitable Trusts	The authors acknowledge financial support by the following grants: NIH/NIGMS R01GM096089 (to F.A.), Arnold and Mabel Beckman Foundation (BYI program). F.A. is a Pew Scholar in Biomedical Sciences, supported by the Pew Charitable Trusts.	Barber CB, 1996, ACM T MATH SOFTWARE, V22, P469, DOI 10.1145/235815.235821; Bartesaghi A, 2008, J STRUCT BIOL, V162, P436, DOI 10.1016/j.jsb.2008.02.008; Beck M, 2009, NAT METHODS, V6, P817, DOI [10.1038/nmeth.1390, 10.1038/NMETH.1390]; Berman HM, 2000, NUCLEIC ACIDS RES, V28, P235, DOI 10.1093/nar/28.1.235; Best C, 2007, METHOD CELL BIOL, V79, P615, DOI 10.1016/S0091-679X(06)79025-2; Bohm J, 200…	38	1	1	2	3	BIOMED CENTRAL LTD	LONDON	236 GRAYS INN RD, FLOOR 6, LONDON WC1X 8HL, ENGLAND	1471-2105			BMC BIOINFORMATICS	BMC Bioinformatics	2018-10-05	2016	17								405	10.1186/s12859-016-1283-3
J	Scheler, U; Brandt, W; Porzel, A; Rothe, K; Manzano, D; Bozic, D; Papaefthimiou, D; Balcke, GU; Henning, A; Lohse, S; Marillonnet, S; Kanellis, AK; Ferrer, A; Tissier, A				Scheler, Ulschan; Brandt, Wolfgang; Porzel, Andrea; Rothe, Kathleen; Manzano, David; Bozic, Dragana; Papaefthimiou, Dimitra; Balcke, Gerd Ulrich; Henning, Anja; Lohse, Swanhild; Marillonnet, Sylvestre; Kanellis, Angelos K.; Ferrer, Albert; Tissier, Alain			Elucidation of the biosynthesis of carnosic acid and its reconstitution in yeast	NATURE COMMUNICATIONS			English	Article							ROSEMARY ROSMARINUS-OFFICINALIS; GOLDEN GATE CLONING; ARABIDOPSIS-THALIANA; PHENOLIC DITERPENES; SALVIA-OFFICINALIS; ANTIMICROBIAL ACTIVITIES; GLANDULAR TRICHOMES; IN-VITRO; CYTOCHROME-P450; ANTIOXIDANT	Rosemary extracts containing the phenolic diterpenes carnosic acid and its derivative carnosol are approved food additives used in an increasingly wide range of products to enhance shelf-life, thanks to their high anti-oxidant activity. We describe here the elucidation of the complete biosynthetic pathway of carnosic acid and its reconstitution in yeast cells. Cytochrome P450 oxygenases (CYP76AH2…	EC [227448]; Leibniz Institute of Plant Biochemistry in Halle, Germany	We thank Jurgen Schmidt for assistance in the analysis of mass spectral data and Benedikt Athmer for his support concerning phylogenetic analysis. We also thank Arianne Schnabel and Sarah Vorndran for technical assistance. The work was supported in part by the TERPMED project (EC grant number 227448) and by the Leibniz Institute of Plant Biochemistry in Halle, Germany.	Bak Soren, 2011, Arabidopsis Book, V9, pe0144, DOI 10.1199/tab.0144; Berman HM, 2000, NUCLEIC ACIDS RES, V28, P235, DOI 10.1093/nar/28.1.235; Bicchi C, 2000, PHYTOCHEM ANALYSIS, V11, P236, DOI 10.1002/1099-1565(200007/08)11:4<236::AID-PCA503>3.0.CO;2-B; Birtic S, 2015, PHYTOCHEMISTRY, V115, P9, DOI 10.1016/j.phytochem.2014.12.026; Bozic D, 2015, PLOS ONE, V10, DOI 10.1371/journal.pone.0124106; Br…	59	4	5	9	24	NATURE PUBLISHING GROUP	LONDON	MACMILLAN BUILDING, 4 CRINAN ST, LONDON N1 9XW, ENGLAND	2041-1723			NAT COMMUN	Nat. Commun.	2018-10-05	2016	7								12942	10.1038/ncomms12942
J	Li, Q; Quan, LN; Lyu, JK; He, ZH; Wang, X; Meng, JJ; Zhao, ZJ; Zhu, LL; Liu, XF; Li, HL				Li, Qiao; Quan, Lina; Lyu, Jiankun; He, Zenghui; Wang, Xia; Meng, Jiajia; Zhao, Zhenjiang; Zhu, Lili; Liu, Xiaofeng; Li, Honglin			Discovery of peptide inhibitors targeting human programmed death 1 (PD-1) receptor	ONCOTARGET			English	Article						immunotherapy; human programmed death 1; peptide inhibitor; protein-protein interactions (PPIs); de novo peptide design	CANCER-IMMUNOTHERAPY; HOT-SPOTS; PROTEIN INTERACTIONS; MOLECULAR-DYNAMICS; WEB SERVER; BINDING; ANTIBODIES; IMMUNITY; LIGANDS; ENERGY	Blocking the interaction of human programmed death 1 (hPD-1) and its ligand hPD-L1 has been a promising immunotherapy in cancer treatment. In this paper, using a computational de novo peptide design method, we designed several hPD-1 binding peptides. The most potent peptide Ar5Y_4 showed a KD value of 1.38 +/- 0.39 mu M, comparable to the binding affinity of the cognate hPD-L1. A Surface Plasmon …	National Natural Science Foundation of China [81302697, 81230076]; National Key Research and Development Program [2016YFA0502304]	The research is supported in part by the National Natural Science Foundation of China (Grants 81302697 and 81230076) (L.Z. and H.L.), and the National Key Research and Development Program (Grant 2016YFA0502304) (H.L.).	Berman HM, 2000, NUCLEIC ACIDS RES, V28, P235, DOI 10.1093/nar/28.1.235; Case DA, 2005, J COMPUT CHEM, V26, P1668, DOI 10.1002/jcc.20290; Case DA, 2015, AMBER; Chang HN, 2015, ANGEW CHEM INT EDIT, V54, P11760, DOI 10.1002/anie.201506225; CLACKSON T, 1995, SCIENCE, V267, P383, DOI 10.1126/science.7529940; Conway P, 2014, PROTEIN SCI, V23, P47, DOI 10.1002/pro.2389; Coutsias EA, 2006, INT J QUANTUM…	52	1	2	7	13	IMPACT JOURNALS LLC	ORCHARD PARK	6666 E QUAKER ST, STE 1, ORCHARD PARK, NY 14127 USA	1949-2553			ONCOTARGET	Oncotarget	2018-10-04	2016	7	40					64967	64976		10.18632/oncotarget.11274
J	Yan, CF; Xu, XJ; Zou, XQ				Yan, Chengfei; Xu, Xianjin; Zou, Xiaoqin			Fully Blind Docking at the Atomic Level for Protein-Peptide Complex Structure Prediction	STRUCTURE			English	Article							BINDING-SITES; SCORING FUNCTION; MEDIATED INTERACTIONS; FLEXIBLE DOCKING; PRIOR KNOWLEDGE; AUTODOCK VINA; WEB SERVER; SURFACES; RECOGNITION; IDENTIFICATION	Protein-peptide interactions play an important role in many cellular processes. In silico prediction of protein-peptide complex structure is highly desirable for mechanistic investigation of these processes and for therapeutic design. However, predicting all-atom structures of protein-peptide complexes without any knowledge about the peptide binding site and the bound peptide conformation remains…	NSF CAREER Award [DBI-0953839]; NIH [R01GM109980]	This work is supported by NSF CAREER Award DBI-0953839 and the NIH R01GM109980 (X.Z.). The computations were performed on the high-performance computing infrastructure supported by NSF CNS-1429294 (principal investigator, Chi-Ren Shyu) and the HPC resources supported by the University of Missouri Bioinformatics Consortium (UMBC).	Antes I, 2010, PROTEINS, V78, P1084, DOI 10.1002/prot.22629; Ben-Shimon A, 2015, STRUCTURE, V23, P929, DOI 10.1016/j.str.2015.03.010; Berman HM, 2000, NUCLEIC ACIDS RES, V28, P235, DOI 10.1093/nar/28.1.235; Blaszczyk M, 2016, METHODS, V93, P72, DOI 10.1016/j.ymeth.2015.07.004; Craik DJ, 2013, CHEM BIOL DRUG DES, V81, P136, DOI 10.1111/cbdd.12055; Dagliyan O, 2011, STRUCTURE, V19, P1837, DOI 10.10…	45	6	6	1	6	CELL PRESS	CAMBRIDGE	600 TECHNOLOGY SQUARE, 5TH FLOOR, CAMBRIDGE, MA 02139 USA	0969-2126	1878-4186		STRUCTURE	Structure	2018-10-04	2016	24	10					1842	1853		10.1016/j.str.2016.07.021
J	Mitchell, MR; Tlusty, T; Leibler, S				Mitchell, Michael R.; Tlusty, Tsvi; Leibler, Stanislas			Strain analysis of protein structures and low dimensionality of mechanical allosteric couplings	PROCEEDINGS OF THE NATIONAL ACADEMY OF SCIENCES OF THE UNITED STATES OF AMERICA			English	Article						strain; protein mechanics; protein allostery; elasticity	HUMAN SERUM-ALBUMIN; STRESS TENSOR ANALYSIS; GLUCOKINASE ACTIVATORS; CRYSTAL-STRUCTURES; ASPARTATE CARBAMOYLTRANSFERASE; STRANGE ATTRACTORS; MOLECULAR-BIOLOGY; ADENYLATE KINASE; RIGID DOMAINS; BINDING	In many proteins, especially allosteric proteins that communicate regulatory states from allosteric to active sites, structural deformations are functionally important. To understand these deformations, dynamical experiments are ideal but challenging. Using static structural information, although more limited than dynamical analysis, is much more accessible. Underused for protein analysis, strain…	Simons Foundation [345430]; Institute for Advanced Study [345801]; National Science Foundation Graduate Research Fellowship [DGE-1325261]; Institute for Basic Science [IBS-R020-D1]; Simons Center for Systems Biology at the Institute for Advanced Study	We thank Jean-Pierre Eckmann, Doeke Hekstra, David Huse, and Olivier Rivoire for discussions, comments, and suggestions. M.R.M. thanks the Institute for Advanced Study for its hospitality. This research has been partly supported by grants from the Simons Foundation to S.L. through The Rockefeller University (Grant 345430) and the Institute for Advanced Study (Grant 345801). This material is based…	Bagi K, 1996, MECH MATER, V22, P165, DOI 10.1016/0167-6636(95)00044-5; Baroni S, 2001, EUR J BIOCHEM, V268, P6214, DOI 10.1046/j.0014-2956.2001.02569.x; Bebernitz GR, 2009, J MED CHEM, V52, P6142, DOI 10.1021/jm900839k; Beck T, 2013, BIOCHEMISTRY-US, V52, P6232, DOI 10.1021/bi400838t; Berman HM, 2000, NUCLEIC ACIDS RES, V28, P235, DOI 10.1093/nar/28.1.235; Bhattacharya AA, 2000, J BIOL CHEM, V275…	69	4	4	5	10	NATL ACAD SCIENCES	WASHINGTON	2101 CONSTITUTION AVE NW, WASHINGTON, DC 20418 USA	0027-8424			P NATL ACAD SCI USA	Proc. Natl. Acad. Sci. U. S. A.	2018-10-04	2016	113	40					E5847	E5855		10.1073/pnas.1609462113
J	Zhao, YW; Lai, HY; Tang, H; Chen, W; Lin, H				Zhao, Ya-Wei; Lai, Hong-Yan; Tang, Hua; Chen, Wei; Lin, Hao			Prediction of phosphothreonine sites in human proteins by fusing different features	SCIENTIFIC REPORTS			English	Article							AMINO-ACID-COMPOSITION; PHOSPHORYLATION SITES; PHYSICOCHEMICAL PROPERTIES; TOOL; IDENTIFICATION; INFORMATION; PROKARYOTES; MECHANISM; SEQUENCES; QUALITY	Phosphorylation is one of the most important protein post-translation modifications. With the rapid development of high-throughput mass spectrometry, phosphorylation site data is rapidly accumulating, which provides us an opportunity to systematically investigate and predict phosphorylation in proteins. The phosphorylation of threonine is the addition of a phosphoryl group to its polar side chain…	Applied Basic Research Program of Sichuan Province [2015JY0100, LZ-LY-45]; Scientific Research Foundation of the Education Department of Sichuan Province [11ZB122]; Nature Scientific Foundation of Hebei Province [C2013209105]; Fundamental Research Funds for the Central Universities of China [ZYGX2015J144, ZYGX2015Z006]; Program for the Top Young Innovative Talents of Higher Learning Institutions …	This work was supported by the Applied Basic Research Program of Sichuan Province (nos 2015JY0100 and LZ-LY-45), the Scientific Research Foundation of the Education Department of Sichuan Province (11ZB122), the Nature Scientific Foundation of Hebei Province (no. C2013209105), the Fundamental Research Funds for the Central Universities of China (nos ZYGX2015J144 and ZYGX2015Z006), and the Program …	Bailey T L, 1994, Proc Int Conf Intell Syst Mol Biol, V2, P28; Bairoch A, 2005, NUCLEIC ACIDS RES, V33, pD154, DOI 10.1093/nar/gki070; Berman HM, 2000, NUCLEIC ACIDS RES, V28, P235, DOI 10.1093/nar/28.1.235; Cao RZ, 2014, BMC BIOINFORMATICS, V15, DOI 10.1186/1471-2105-15-120; Cao RZ, 2014, BMC STRUCT BIOL, V14, DOI 10.1186/1472-6807-14-13; Chang C, 1998, PLANT PHYSIOL, V117, P723, DOI 10.1104/pp.…	35	10	10	0	13	NATURE PUBLISHING GROUP	LONDON	MACMILLAN BUILDING, 4 CRINAN ST, LONDON N1 9XW, ENGLAND	2045-2322			SCI REP-UK	Sci Rep	2018-10-04	2016	6								34817	10.1038/srep34817
J	Di Giovanni, C; Ettari, R; Sarno, S; Rotondo, A; Bitto, A; Squadrito, F; Altavilla, D; Schirmeister, T; Novellino, E; Grasso, S; Zappala, M; Lavecchia, A				Di Giovanni, Carmen; Ettari, Roberta; Sarno, Serena; Rotondo, Archimede; Bitto, Alessandra; Squadrito, Francesco; Altavilla, Domenica; Schirmeister, Tanja; Novellino, Ettore; Grasso, Silvana; Zappala, Maria; Lavecchia, Antonio			Identification of noncovalent proteasome inhibitors with high selectivity for chymotrypsin-like activity by a multistep structure based virtual screening	EUROPEAN JOURNAL OF MEDICINAL CHEMISTRY			English	Article						Proteasome inhibitors; Non-covalent; Peptide scaffold; Docking studies; Virtual screening	CANCER-CELL INVASION; 20S PROTEASOME; ANGSTROM RESOLUTION; CRYSTAL-STRUCTURES; MULTIPLE-MYELOMA; DOCKING TOOLS; BINDING-SITE; DISCOVERY; ACTIVATION; BORTEZOMIB	Noncovalent proteasome inhibitors introduce an alternative mechanism of inhibition to that of covalent inhibitors, e.g. carfilzomib, used in cancer therapy. A multistep hierarchical structure-based virtual screening (SBVS) of the 65,375 NCI lead-like compound library led to the identification of two compounds (9 and 28) which noncovalently inhibited the chymotrypsin-like (ChT-L) activity (K-i = 2…	Ministero dell'Istruzione, dell'Universita e della Ricerca Scientifica e Tecnologica [MIUR-PRIN], Rome, Italy [2010W7YRLZ_003, 2010W7YRLZ_004]; "Research & Mobility Program" of the University of Messina	This work was financially supported by the Ministero dell'Istruzione, dell'Universita e della Ricerca Scientifica e Tecnologica [MIUR-PRIN2010-2011, grants 2010W7YRLZ_003 (A.L.) and 2010W7YRLZ_004 (S.G.)], Rome, Italy and by the "Research & Mobility Program 2016" of the University of Messina. Gratitude is expressed to the National Cancer Institute for providing test compounds free of charge.	Almond JB, 2002, LEUKEMIA, V16, P433, DOI 10.1038/sj/leu/2402417; Altavilla D, 2009, BRIT J PHARMACOL, V157, P1410, DOI 10.1111/j.1476-5381.2009.00322.x; Baell JB, 2010, J MED CHEM, V53, P2719, DOI 10.1021/jm901137j; BALEJA JD, 1990, J MAGN RESON, V87, P375, DOI 10.1016/0022-2364(90)90015-2; Berman HM, 2000, NUCLEIC ACIDS RES, V28, P235, DOI 10.1093/nar/28.1.235; Blackburn C, 2010, BIOCHEM J, V43…	74	3	4	2	27	ELSEVIER FRANCE-EDITIONS SCIENTIFIQUES MEDICALES ELSEVIER	PARIS	23 RUE LINOIS, 75724 PARIS, FRANCE	0223-5234	1768-3254		EUR J MED CHEM	Eur. J. Med. Chem.	2018-10-04	2016	121						578	591		10.1016/j.ejmech.2016.05.049
J	Nunes, IKD; de Souza, ET; Cardozo, SVS; Carvalho, VD; Romeiro, NC; Silva, PMRE; Martins, MA; Barreiro, EJ; Lima, LM				da Costa Nunes, Isabelle Karine; de Souza, Everton Tenorio; Cardozo, Suzana Vanessa S.; Carvalho, Vinicius de Frias; Romeiro, Nelilma Correia; Rodrigues e Silva, Patricia Machado; Martins, Marco Aurelio; Barreiro, Eliezer J.; Lima, Lidia Moreira			Synthesis, Pharmacological Profile and Docking Studies of New Sulfonamides Designed as Phosphodiesterase-4 Inhibitors	PLOS ONE			English	Article							OBSTRUCTIVE PULMONARY-DISEASE; SWISS-MODEL WORKSPACE; PDE4 INHIBITORS; AIRWAY INFLAMMATION; DRUG DISCOVERY; ASTHMA; EOSINOPHILS; POTENT; SELECTIVITY; STRATEGY	Prior investigations showed that increased levels of cyclic AMP down-regulate lung inflammatory changes, stimulating the interest in phosphodiesterase (PDE) 4 as therapeutic target. Here, we described the synthesis, pharmacological profile and docking properties of a novel sulfonamide series (5 and 6a-k) designed as PDE4 inhibitors. Compounds were screened for their selectivity against the four i…	CNPq; FAPERJ; FAPEAL; CAPES; INCT-INOFAR [573.564/2008-6, E-26/170.020/2008]	This work was supported by CNPq, FAPERJ, FAPEAL, CAPES, and INCT-INOFAR (573.564/2008-6 and E-26/170.020/2008). The funders had no role in study design, data collection and analysis, decision to publish, or preparation of the manuscript.	Arnold K, 2006, BIOINFORMATICS, V22, P195, DOI 10.1093/bioinformatics/bti770; BARCO A, 1973, SYNTHESIS-STUTTGART, P316; Bateman ED, 2006, ANN ALLERG ASTHMA IM, V96, P679; Berman HM, 2000, NUCLEIC ACIDS RES, V28, P235, DOI 10.1093/nar/28.1.235; Bordoli L, 2009, NAT PROTOC, V4, P1, DOI 10.1038/nprot.2008.197; Burgin AB, 2010, NAT BIOTECHNOL, V28, P63, DOI 10.1038/nbt.1598; Card GL, 2005, NAT BIOTEC…	51	0	0	3	13	PUBLIC LIBRARY SCIENCE	SAN FRANCISCO	1160 BATTERY STREET, STE 100, SAN FRANCISCO, CA 94111 USA	1932-6203			PLOS ONE	PLoS One	2018-10-03	2016	11	10							e0162895	10.1371/journal.pone.0162895
J	Mazzocco, G; Lazniewski, M; Migdal, P; Szczepinska, T; Radomski, JP; Plewczynski, D				Mazzocco, Giovanni; Lazniewski, Michal; Migdal, Piotr; Szczepinska, Teresa; Radomski, Jan P.; Plewczynski, Dariusz			3DFlu: database of sequence and structural variability of the influenza hemagglutinin at population scale	DATABASE-THE JOURNAL OF BIOLOGICAL DATABASES AND CURATION			English	Article							RECEPTOR SPECIFICITY; VIRUS; INFORMATION; RESOURCE	The influenza virus type A (IVA) is an important pathogen which is able to cause annual epidemics and even pandemics. This fact is the consequence of the antigenic shifts and drifts capabilities of IVA, caused by the high mutation rate and the reassortment capabilities of the virus. The hemagglutinin (HA) protein constitutes the main IVA antigen and has a crucial role in the infection mechanism, …	Polish National Science Centre [2014/15/B/ST6/05082, 2013/09/B/NZ2/00121]; project Human Capital Operational Programme project 'Information technologies: Research and their interdisciplinary applications'	This work has been supported by the Polish National Science Centre, grant numbers (2014/15/B/ST6/05082, 2013/09/B/NZ2/00121]) and by the project Human Capital Operational Programme project 'Information technologies: Research and their interdisciplinary applications'.	ALTSCHUL SF, 1990, J MOL BIOL, V215, P403, DOI 10.1006/jmbi.1990.9999; Bakan A, 2011, BIOINFORMATICS, V27, P1575, DOI 10.1093/bioinformatics/btr168; Bao YM, 2008, J VIROL, V82, P596, DOI 10.1128/JVI.02005-07; Benkert P, 2009, NUCLEIC ACIDS RES, V37, pW510, DOI 10.1093/nar/gkp322; Berman HM, 2000, NUCLEIC ACIDS RES, V28, P235, DOI 10.1093/nar/28.1.235; Bogner P, 2006, NATURE, V442, P981, DOI 10.10…	30	0	0	0	1	OXFORD UNIV PRESS	OXFORD	GREAT CLARENDON ST, OXFORD OX2 6DP, ENGLAND	1758-0463			DATABASE-OXFORD	Database	2018-10-02	2016									baw130	10.1093/database/baw130
J	Stanishneva-Konovalova, TB; Derkacheva, NI; Polevova, SV; Sokolova, OS				Stanishneva-Konovalova, T. B.; Derkacheva, N. I.; Polevova, S. V.; Sokolova, O. S.			The Role of BAR Domain Proteins in the Regulation of Membrane Dynamics	ACTA NATURAE			English	Review						domains; lipid membranes; membrane dynamics	SYNAPTIC VESICLE ENDOCYTOSIS; MISSING-IN-METASTASIS; ENDOPHILIN N-BAR; STRUCTURAL BASIS; ACTIN DYNAMICS; NERVOUS WRECK; AMPHIPATHIC HELICES; MOLECULAR-DYNAMICS; AMPHIPHYSIN-2 BIN1; TUBULAR MEMBRANES	Many cellular processes are associated with membrane remodeling. The BAR domain protein family plays a key role in the formation and detection of local membrane curvatures and in attracting other proteins, including the regulators of actin dynamics. Based on their structural and phylogenetic properties, BAR domains are divided into several groups which affect membrane in various ways and perform …	Russian Science Foundation [14-14-00234]	This work was supported by the Russian Science Foundation (grant no. 14-14-00234).	Adam J, 2015, SCI REP-UK, V5, DOI 10.1038/srep15452; Ambroso MR, 2014, P NATL ACAD SCI USA, V111, P6982, DOI 10.1073/pnas.1402233111; Andrieu G, 2014, CARCINOGENESIS, V35, P2503, DOI 10.1093/carcin/bgu185; Aresta S, 2002, BIOCHEM J, V367, P57, DOI 10.1042/BJ20020829; Aspenstrom P, 1997, CURR BIOL, V7, P479, DOI 10.1016/S0960-9822(06)00219-3; Becalska AN, 2013, MOL BIOL CELL, V24, P2406, DOI 10.10…	103	1	1	1	1	RUSSIAN FEDERATION AGENCY SCIENCE & INNOVATION	MOSCOW	NAUCHNY PARK MGU, VLAD 1, STROENIYE 75G, LENINSKIYE GORY, MOSCOW, 119991, RUSSIA	2075-8251			ACTA NATURAE	Acta Naturae	OCT-DEC	2016	8	4					60	69
J	Hawk, MA; McCallister, C; Schafer, ZT				Hawk, Mark A.; McCallister, Chelsea; Schafer, Zachary T.			Antioxidant Activity during Tumor Progression: A Necessity for the Survival of Cancer Cells?	CANCERS			English	Review						antioxidant; reactive oxygen species; extracellular matrix; NADPH; Nrf2; pentose phosphate pathway; metastasis	BREAST-CANCER; EXTRACELLULAR-MATRIX; PYRUVATE-KINASE; METABOLISM; GLUTATHIONE; CULTURES; ACINI; M2	Antioxidant defenses encompass a variety of distinct compounds and enzymes that are linked together through their capacity to neutralize and scavenge reactive oxygen species (ROS). While the relationship between ROS and tumorigenesis is clearly complex and context dependent, a number of recent studies have suggested that neutralizing ROS can facilitate tumor progression and metastasis in multiple…	National Science Foundation; American Cancer Society [RSG-14-145-01, CCR14302768]; Phi Beta Psi National Project	We thank the members of the Schafer lab for stimulating discussion and the creation of a superb research environment. We are grateful for the variety of grants and fellowships supporting this work. Mark A. Hawk is the recipient of a Graduate Research Fellowship from the National Science Foundation. Zachary T. Schafer is the recipient of grants from the American Cancer Society (RSG-14-145-01), Sus…	Anastasiou D, 2011, SCIENCE, V334, P1278, DOI 10.1126/science.1211485; Bensinger S. J., 2012, CELL DEV BIOL, V23, P352, DOI [10.1016/j.semcdb.2012.02.00322406683, DOI 10.1016/J.SEMCDB.2012.02.00322406683]; Berman HM, 2000, NUCLEIC ACIDS RES, V28, P235, DOI 10.1093/nar/28.1.235; Buchheit CL, 2014, NAT REV CANCER, V14, P632, DOI 10.1038/nrc3789; Chen EI, 2007, CANCER RES, V67, P1472, DOI 10.1158/00…	30	0	0	3	3	MDPI AG	BASEL	ST ALBAN-ANLAGE 66, CH-4052 BASEL, SWITZERLAND	2072-6694			CANCERS	Cancers	OCT	2016	8	10							92	10.3390/cancers8100092
J	Alfinito, E; Reggiani, L				Alfinito, Eleonora; Reggiani, Lino			Modeling Current-Voltage Charateristics of Proteorhodopsin and Bacteriorhodopsin: Towards an Optoelectronics Based on Proteins	IEEE TRANSACTIONS ON NANOBIOSCIENCE			English	Article						Optoelectronics; protein electrical properties; proteotronics	TRANSPORT; MONOLAYERS; RECEPTORS; CHANNEL	Current-voltage characteristics of metal-proteinmetal structures made of proteorhodopsin and bacteriorhodopsin are modeled by using a percolation-like approach. Starting from the tertiary structure pertaining to the single protein, an analogous resistance network is created. Charge transfer inside the network is described as a sequential tunneling mechanism and the current is calculated for each …			Alfinito E, 2013, NANOTECHNOLOGY, V24, DOI 10.1088/0957-4484/24/39/395501; Alfinito E, 2011, PHYS REV E, V83, DOI 10.1103/PhysRevE.83.042902; Alfinito E, 2009, J PHYS CONF SER, V193, DOI 10.1088/1742-6596/193/1/012107; Alfinito E, 2009, EPL-EUROPHYS LETT, V85, DOI 10.1209/0295-5075/85/68002; Alfinito E., 2015, PROTEOTRONICS ELECT, P3; Alfinito E., 2015, PROTEOTRONICS DEV PR; Alfinito E, 2015, PHY…	33	0	0	0	0	IEEE-INST ELECTRICAL ELECTRONICS ENGINEERS INC	PISCATAWAY	445 HOES LANE, PISCATAWAY, NJ 08855-4141 USA	1536-1241	1558-2639		IEEE T NANOBIOSCI	IEEE Trans. Nanobiosci.	OCT	2016	15	7					775	780		10.1109/TNB.2016.2617678
J	He, DY; Huang, L; Xu, YP; Pan, XL; Liu, LJ				He, Deyong; Huang, Ling; Xu, Yaping; Pan, Xiaoliang; Liu, Lijun			Computational analysis and enzyme assay of inhibitor response to disease single nucleotide polymorphisms (SNPs) in lipoprotein lipase	Journal of Bioinformatics and Computational Biology			English	Article						Lipoprotein lipase; missense mutation; single nucleotide polymorphism; lipase inhibitor; drug response	FAMILIAL LPL DEFICIENCY; MOLECULAR-MECHANICS; CHOLESTEROL LEVELS; MISSENSE MUTATION; PANCREATIC LIPASE; PROTEIN-STRUCTURE; FORCE-FIELD; GENE; BINDING; ASSOCIATION	Lipoprotein lipase (LPL) is the rate-limiting enzyme for the hydrolysis of the triglyceride (TG) core of circulating TG-rich lipoproteins, chylomicrons, and very low-density lipoproteins. The enzyme has been established as an efficacious and safe therapeutic target for the management of obesity. Here, a systematic profile of the lipase inhibitor response of three anti-obesity agents (Orlistat, Li…	National Natural Science Foundation of China [51564024]; Natural Science Foundation of Jiangxi Province [2010GZH0073, 20122BAB213009, 20132BAB213010]; Science and Technology Support Program of Jiangxi Province [20123BBG70218]; Teaching Reform Project of Jiangxi Province [JXJG-14-9-31]; Doctoral Scientific Research Foundation of Jinggangshan University [JZB11035]	This work was supported by the National Natural Science Foundation of China (No. 51564024), the Natural Science Foundation of Jiangxi Province (Nos. 2010GZH0073, 20122BAB213009 and 20132BAB213010), the Science and Technology Support Program of Jiangxi Province (No. 20123BBG70218), the Teaching Reform Project of Jiangxi Province (No. JXJG-14-9-31) and the Doctoral Scientific Research Foundation of…	BEG OU, 1990, P NATL ACAD SCI USA, V87, P3474, DOI 10.1073/pnas.87.9.3474; Bekircan O, 2014, ARCH PHARM, V347, P387, DOI 10.1002/ardp.201300344; Berman HM, 2000, NUCLEIC ACIDS RES, V28, P235, DOI 10.1093/nar/28.1.235; Birari RB, 2007, DRUG DISCOV TODAY, V12, P879, DOI 10.1016/j.drudis.2007.07.024; Bleich S, 2008, ANNU REV PUBL HEALTH, V29, P273, DOI 10.1146/annurev.publhealth.29.020907.090954; Ch…	50	0	0	1	1	IMPERIAL COLLEGE PRESS	LONDON	57 SHELTON ST, COVENT GARDEN, LONDON WC2H 9HE, ENGLAND	0219-7200	1757-6334		J BIOINF COMPUT BIOL	J. Bioinform. Comput. Biol.	OCT	2016	14	5			SI				1650028	10.1142/S0219720016500281
J	Berman, HM; Burley, SK; Kleywegt, GJ; Markley, JL; Nakamura, H; Velankar, S				Berman, Helen M.; Burley, Stephen K.; Kleywegt, Gerard J.; Markley, John L.; Nakamura, Haruki; Velankar, Sameer			The archiving and dissemination of biological structure data	CURRENT OPINION IN STRUCTURAL BIOLOGY			English	Article							PROTEIN DATA-BANK; 3-DIMENSIONAL FOURIER SYNTHESIS; MACROMOLECULAR STRUCTURE DATA; VALIDATION TASK-FORCE; X-RAY-ANALYSIS; SCOP DATABASE; RESOLUTION; SEQUENCES; WORKSHOP; WWPDB	The global Protein Data Bank (PDB) was the first open-access digital archive in biology. The history and evolution of the PDB are described, together with the ways in which molecular structural biology data and information are collected, curated, validated, archived, and disseminated by the members of the Worldwide Protein Data Bank organization. Particular emphasis is placed on the role of commu…	NSF [DBI-1338415]; NIH, DOE; EMBL-EBI; Wellcome Trust [104948]; BBSRC [BB/J007471/1, BB/K016970/1, BB/K020013/1, BB/M013146/1, BB/M011674/1, BB/M020347/1, BB/M020428/1]; NIGMS [1RO1 GM079429-01A1, 1R01 GM109046]; EU [284209, 675858]; MRC [MR/L007835/1]; JST-NBDC	RCSB PDB is supported by NSF [DBI-1338415], NIH, DOE; PDBe by EMBL-EBI, Wellcome Trust [104948], BBSRC [BB/J007471/1, BB/K016970/1, BB/K020013/1, BB/M013146/1, BB/M011674/1, BB/M020347/1, BB/M020428/1], NIGMS [1RO1 GM079429-01A1], EU [284209,675858] and MRC [MR/L007835/1]; PDBj by JST-NBDC and BMRB by NIGMS [1R01 GM109046].	Adams PD, 2016, STRUCTURE, V24, P502, DOI 10.1016/j.str.2016.02.017; Andreeva A, 2004, NUCLEIC ACIDS RES, V32, pD226, DOI 10.1093/nar/gkh039; Andreeva A, 2008, NUCLEIC ACIDS RES, V36, pD419, DOI 10.1093/nar/gkm993; Berman H, 2003, NAT STRUCT BIOL, V10, P980, DOI 10.1038/nsb1203-980; Berman HM, 2006, STRUCTURE, V14, P1211, DOI 10.1016/j.str.2006.06.005; BERMAN HM, 1992, BIOPHYS J, V63, P751; Berma…	43	5	5	0	3	CURRENT BIOLOGY LTD	LONDON	84 THEOBALDS RD, LONDON WC1X 8RR, ENGLAND	0959-440X	1879-033X		CURR OPIN STRUC BIOL	Curr. Opin. Struct. Biol.	OCT	2016	40						17	22		10.1016/j.sbi.2016.06.018
J	Dang, TKL; Meckbach, C; Tacke, R; Waack, S; Gultas, M				Dang, Truong Khanh Linh; Meckbach, Cornelia; Tacke, Rebecca; Waack, Stephan; Gueltas, Mehmet			A Novel Sequence-Based Feature for the Identification of DNA-Binding Sites in Proteins Using Jensen-Shannon Divergence	ENTROPY			English	Article						entropy; Jensen-Shannon divergence; Random Forest; DNA-binding sites	STRUCTURE-BASED PREDICTION; COUPLED MUTATION FINDER; AMINO-ACID-SEQUENCES; STRUCTURAL INFORMATION; ACCURATE PREDICTION; RANDOM FORESTS; WEB SERVER; RESIDUES; CONSERVATION; EVOLUTIONARY	The knowledge of protein-DNA interactions is essential to fully understand the molecular activities of life. Many research groups have developed various tools which are either structure-or sequence-based approaches to predict the DNA-binding residues in proteins. The structure-based methods usually achieve good results, but require the knowledge of the 3D structure of protein; while sequence-base…	German Research Foundation; Open Access Publication Funds of the Gottingen University	We thank our colleagues Edgar Wingender, Martin Haubrock and Sebastian Zeidler for their helpful advice and insights at early stages of this project. We acknowledge support by the German Research Foundation and the Open Access Publication Funds of the Gottingen University.	Ahmad S, 2005, BMC BIOINFORMATICS, V6, DOI 10.1186/1471-2105-6-33; Ahmad S, 2004, BIOINFORMATICS, V20, P477, DOI 10.1093/bioinformatics/btg432; Bartlett GJ, 2002, J MOL BIOL, V324, P105, DOI 10.1016/S0022-2836(02)01036-7; Berman HM, 2000, NUCLEIC ACIDS RES, V28, P235, DOI 10.1093/nar/28.1.235; Bhardwaj N, 2005, P ANN INT IEEE EMBS, P2611, DOI 10.1109/IEMBS.2005.1617004; Breiman L, 2001, MACH LEAR…	48	0	0	3	4	MDPI AG	BASEL	ST ALBAN-ANLAGE 66, CH-4052 BASEL, SWITZERLAND	1099-4300			ENTROPY-SWITZ	Entropy	OCT	2016	18	10							379	10.3390/e18100379
J	Ayine-Tora, DM; Kingsford-Adaboh, R; Asomaning, WA; Harrison, JJEK; Mills-Robertson, FC; Bukari, Y; Sakyi, PO; Kaminta, S; Reynisson, J				Ayine-Tora, Daniel M.; Kingsford-Adaboh, Robert; Asomaning, William A.; Harrison, Jerry J. E. K.; Mills-Robertson, Felix C.; Bukari, Yahaya; Sakyi, Patrick O.; Kaminta, Sylvester; Reynisson, Johannes			Coumarin Antifungal Lead Compounds from Millettia thonningii and Their Predicted Mechanism of Action	MOLECULES			English	Article						natural products; Candida albicans; molecular modelling; CYP51; Sclorotium; isoflavone	PROTEIN DATA-BANK; CANDIDA-ALBICANS; RESISTANCE; DENSITY; DOCKING; CYP51; SUSCEPTIBILITY; EPIDEMIOLOGY; ISOFLAVONES; FLUCONAZOLE	Fungal pathogens continue to pose challenges to humans and plants despite efforts to control them. Two coumarins, robustic acid and thonningine-C isolated from Millettia thonningii, show promising activity against the fungus Candida albicans with minimum fungicidal concentration of 1.0 and 0.5 mg/mL, respectively. Molecular modelling against the putative bio-molecular target, lanosterol 14 alpha-…	Government of Ghana Graduate Studies Allowance; Department of Chemistry, UG Graduate Assistantship	Government of Ghana Graduate Studies Allowance and Department of Chemistry, UG Graduate Assistantship to DMA-T is duly acknowledged.	Abbiw D. K., 1990, USEFUL PLANTS GHANA; AHLUWALIA VK, 1985, MONATSH CHEM, V116, P869, DOI 10.1007/BF00809163; Al-Amiery AA, 2012, MOLECULES, V17, P5713, DOI 10.3390/molecules17055713; ALLINGER NL, 1977, J AM CHEM SOC, V99, P8127, DOI 10.1021/ja00467a001; ASOMANING WA, 1995, PHYTOCHEMISTRY, V39, P1215, DOI 10.1016/0031-9422(95)00164-3; Asomaning WA, 1999, PHYTOCHEMISTRY, V51, P937, DOI 10.1016/S00…	72	4	4	1	6	MDPI AG	BASEL	ST ALBAN-ANLAGE 66, CH-4052 BASEL, SWITZERLAND	1420-3049			MOLECULES	Molecules	OCT	2016	21	10							1369	10.3390/molecules21101369
J	Pu, YQ; Zhang, XT; Zhang, Q; Wang, B; Chen, YX; Zang, CQ; Wang, YQ; Dong, TTX; Zhang, T				Pu, Yiqiong; Zhang, Xitong; Zhang, Qi; Wang, Bing; Chen, Yuxi; Zang, Chuanqi; Wang, Yuqin; Dong, Tina Ting-Xia; Zhang, Tong			20(S)-Protopanaxadiol Phospholipid Complex: Process Optimization, Characterization, In Vitro Dissolution and Molecular Docking Studies	MOLECULES			English	Article						20(S)-protopanaxadiol; phospholipid complex; central composite design; DSC; molecular docking	IMPROVED ORAL BIOAVAILABILITY; CONTROLLED DRUG-RELEASE; MITOMYCIN-C; DELIVERY SYSTEMS; ISCHEMIC-STROKE; SD RATS; CELLS; NANOPARTICLES; IMPROVE; VIVO	20(S)-Protopanaxadiol (PPD), a bioactive compound extracted from ginseng, possesses cardioprotective, neuroprotective, anti-inflammatory, antiestrogenic, anticancer and anxiolytic effects. However, the clinical application of PPD is limited by its weak aqueous solubility. In this study, we optimized an efficient method of preparing its phospholipid complex (PPD-PLC) using a central composite desi…	National Natural Science Foundation of China [81303233]; Foundation of the Shanghai Science and Technology Commission [13401900300]	This work was financially supported by National Natural Science Foundation of China (81303233) and the Foundation of the Shanghai Science and Technology Commission (13401900300).	Bak DH, 2016, INT J MOL MED, V37, P378, DOI 10.3892/ijmm.2015.2440; Began G, 1999, J AGR FOOD CHEM, V47, P4992, DOI 10.1021/jf9900837; Ben-Eltriki M, 2016, J STEROID BIOCHEM, V158, P207, DOI [10.1016/j.jsbmb.2015.12.002, 10.1016/j.jsbmb.201512.002]; Berman HM, 2000, NUCLEIC ACIDS RES, V28, P235, DOI 10.1093/nar/28.1.235; Cai XQ, 2012, INT J PHARMACEUT, V433, P102, DOI 10.1016/j.ijpharm.2012.05.00…	74	1	1	2	6	MDPI AG	BASEL	ST ALBAN-ANLAGE 66, CH-4052 BASEL, SWITZERLAND	1420-3049			MOLECULES	Molecules	OCT	2016	21	10							1396	10.3390/molecules21101396
J	Singh, K; Zaw, AM; Sekar, R; Palak, A; Allam, AA; Ajarem, J; Chow, BKC				Singh, Kailash; Zaw, Aung Moe; Sekar, Revathi; Palak, Ahuja; Allam, Ahmed A.; Ajarem, Jamaan; Chow, Billy K. C.			Glycyrrhizic Acid Reduces Heart Rate and Blood Pressure by a Dual Mechanism	MOLECULES			English	Article						adrenergic receptors; glycyrrhizic acid; vasoactive-intestinal peptide; tachycardia	BETA(2)-ADRENERGIC RECEPTOR; DOWN-REGULATION; IN-VITRO; BETA-AR; HYPERTENSION; STIMULATION; DOCKING; ARRHYTHMIAS; COMPLEXES; ANIMALS	Beta adrenergic receptors are crucial for their role in rhythmic contraction of heart along with their role in the pathological conditions such as tachycardia and high risk of heart failure. Studies report that the levels of beta-1 adrenergic receptor tend to decrease by 50%, whereas, the levels of beta-2 adrenergic receptor remains constant during the risk of heart failure. Beta blockers-the ant…	Hong Kong Government Research Grant Council grant; Collaborative Research Grant Council grant; collaborative Research Fund [CRFHKU6/CRF/11G]; Hong Kong University [764812M]; International Scientific Partnership Program ISPP at King Saud University through ISPP [008]	The present study was supported by the Hong Kong Government Research Grant Council grant, Collaborative Research Grant Council grant, collaborative Research Fund CRFHKU6/CRF/11G and Hong Kong University 764812M to B.K.C.C. The authors extend their appreciation to the International Scientific Partnership Program ISPP at King Saud University for funding this research work through ISPP#008.	Aidietis A, 2007, CURR PHARM DESIGN, V13, P2545, DOI 10.2174/138161207781663037; ALTSCHULD RA, 1995, CIRCULATION, V92, P1612; Andrusier N, 2007, PROTEINS, V69, P139, DOI 10.1002/prot.21495; Antov G., 1997, Eksperimental'naya i Klinicheskaya Farmakologiya, V60, P65; Beard H, 2013, PLOS ONE, V8, DOI 10.1371/journal.pone.0082849; Bengtsson K, 2001, HYPERTENSION, V37, P1303; Berman HM, 2000, NUCLEIC …	60	1	1	2	4	MDPI AG	BASEL	ST ALBAN-ANLAGE 66, CH-4052 BASEL, SWITZERLAND	1420-3049			MOLECULES	Molecules	OCT	2016	21	10							1291	10.3390/molecules21101291
J	Chaharbakhshi, E; Jemc, JC				Chaharbakhshi, Edwin; Jemc, Jennifer C.			Broad-complex, tramtrack, and bric-a-brac (BTB) proteins: Critical regulators of development	GENESIS			English	Review						early development; insect; organogenesis; transcription	LEUKEMIA ZINC-FINGER; DROSOPHILA GAGA FACTOR; ACUTE PROMYELOCYTIC LEUKEMIA; POSITION-EFFECT VARIEGATION; ENHANCER-BLOCKING ACTIVITY; ZF TRANSCRIPTION FACTORS; AXON GUIDANCE GENE; POLYCOMB-GROUP; DNA-BINDING; POZ DOMAIN	Broad-complex, Tramtrack, and Bric-a-brac/poxvirus and zinc finger (BTB/POZ) family proteins are a diverse family of proteins that are characterized by the presence of a common protein-protein interaction domain, known as the BTB domain. BTB proteins have been identified in poxviruses and many eukaryotes, and have diverse functions, ranging from transcriptional regulation and chromatin remodeling…	Mulcahy Scholars Program Research Fellowship from Loyola University Chicago	Funding InformationThis research was supported by Mulcahy Scholars Program Research Fellowship from Loyola University Chicago.	Ahmad KF, 1998, P NATL ACAD SCI USA, V95, P12123, DOI 10.1073/pnas.95.21.12123; Arama E, 2006, EMBO J, V25, P232, DOI 10.1038/sj.emboj.7600920; Arama E, 2003, DEV CELL, V4, P687, DOI 10.1016/S1534-5807(03)00120-5; Arama E, 2007, PLOS BIOL, V5, P2745, DOI 10.1371/journal.pbio.0050251; Aravind L, 1999, J MOL BIOL, V285, P1353, DOI 10.1006/jmbi.1998.2394; BARDWELL VJ, 1994, GENE DEV, V8, P1664, DOI …	194	3	4	3	6	WILEY-BLACKWELL	HOBOKEN	111 RIVER ST, HOBOKEN 07030-5774, NJ USA	1526-954X	1526-968X		GENESIS	Genesis	OCT	2016	54	10					505	518		10.1002/dvg.22964
J	Ishikawa, F; Shirahashi, M; Hayakawa, H; Yamaguchi, A; Hirokawa, T; Tsumuraya, T; Fujii, I				Ishikawa, Fumihiro; Shirahashi, Masato; Hayakawa, Hiroshi; Yamaguchi, Asako; Hirokawa, Takatsugu; Tsumuraya, Takeshi; Fujii, Ikuo			Site-Directed Chemical Mutations on Abzymes: Large Rate Accelerations in the Catalysis by Exchanging the Functionalized Small Nonprotein Components	ACS CHEMICAL BIOLOGY			English	Article							TRANSITION-STATE STABILIZATION; PRODUCT CHAIN-LENGTH; COMBINATORIAL LIBRARY; DIPHOSPHATE SYNTHASE; PROTON ABSTRACTION; ESCHERICHIA-COLI; ACTIVE-SITES; AMINO-ACID; ANTIBODIES; PROTEINS	Taking advantage of antibody molecules to generate tailor-made binding sites, we propose a new class of protein modifications, termed as site-directed chemical mutation. In this modification, chemically synthesized catalytic components with a variety of steric and electronic properties can be noncovalently and nongenetically incorporated into specific sites in antibody molecules to induce enzymat…	JSPS KAKENHI [20310138]	This work was supported by JSPS KAKENHI Grant Number (20310138). The authors thank H. Hayashi (Osaka Medical College, Japan) for helpful discussions.	AlLazikani B, 1997, J MOL BIOL, V273, P927, DOI 10.1006/jmbi.1997.1354; Anslyn E. V., 2006, MODERN PHYS ORGANIC; Berman HM, 2000, NUCLEIC ACIDS RES, V28, P235, DOI 10.1093/nar/28.1.235; CAGNON C, 1991, PROTEIN ENG, V4, P843, DOI 10.1093/protein/4.7.843; Charbonnier JB, 1997, SCIENCE, V275, P1140, DOI 10.1126/science.275.5303.1140; Debler EW, 2005, P NATL ACAD SCI USA, V102, P4984, DOI 10.1073/pna…	43	0	0	3	9	AMER CHEMICAL SOC	WASHINGTON	1155 16TH ST, NW, WASHINGTON, DC 20036 USA	1554-8929	1554-8937		ACS CHEM BIOL	ACS Chem. Biol.	OCT	2016	11	10					2803	2811		10.1021/acschembio.6b00574
J	Scharinger, B; Messner, B; Turkcan, A; Schuster, D; Vuorinen, A; Pitterl, F; Heinz, K; Arnhard, K; Laufer, G; Grimm, M; Stuppner, H; Oberacher, H; Eller, P; Ritsch, A; Bernhard, D				Scharinger, Bernhard; Messner, Barbara; Tuerkcan, Adrian; Schuster, Daniela; Vuorinen, Anna; Pitterl, Florian; Heinz, Katharina; Arnhard, Kathrin; Laufer, Guenther; Grimm, Michael; Stuppner, Hermann; Oberacher, Herbert; Eller, Philipp; Ritsch, Andreas; Bernhard, David			Leoligin, the major lignan from Edelweiss, inhibits 3-hydroxy-3-methyl-glutaryl-CoA reductase and reduces cholesterol levels in ApoE -/- mice	JOURNAL OF MOLECULAR AND CELLULAR CARDIOLOGY			English	Article						Cholesterol; HMGCR inhibitor; Diabetes; Obesity; Therapy	CORONARY-HEART-DISEASE; ESTER TRANSFER PROTEIN; HMG-COA REDUCTASE; CONFORMER GENERATION; STATIN THERAPY; DATA-BANK; ATHEROSCLEROSIS; PHARMACOPHORES; METABOLISM; MECHANISM	The health benefit through the control of lipid levels in hyperlipidaemic individuals is evident from a large number of studies. The pharmacological options to achieve this goal shall be as specific and personalized as the reasons for and co-factors of hyperlipidaemia. It was the goal of this study to reveal the impact of leoligin on cholesterol levels and to define its mechanism of action. Oral …	Austrian National Bank [14745, 14590]; Joseph Skoda Award of Austrian Society of Internal Medicine [2012]; Austrian Science Fund (FWF, research network "Drugs from Nature Targeting Inflammation) [S10703, S10711]	This project was supported by the Austrian National Bank (Project 14745 to D.B. and Project 14590 to B.M.), by the Joseph Skoda Award of Austrian Society of Internal Medicine (P.E.) (#2012), and the Austrian Science Fund (FWF, research network "Drugs from Nature Targeting Inflammation, project-numbers S10703 and S10711 to D.S. and H.S.).	Ahmadian M, 2013, NAT MED, V19, P557, DOI 10.1038/nm.3159; Anitschkow NN, 1913, ZENTRALBL ALLG PATHO, V24, P1; Baigent C, 2005, LANCET, V366, P1267, DOI 10.1016/S0140-6736(05)67394-1; Barter PJ, 2003, ARTERIOSCL THROM VAS, V23, P160, DOI 10.1161/01.ATV.0000054658.91146.64; Berman HM, 2000, NUCLEIC ACIDS RES, V28, P235, DOI 10.1093/nar/28.1.235; Betteridge DJ, 2016, NAT REV ENDOCRINOL, V12, P99, D…	34	0	0	3	3	ELSEVIER SCI LTD	OXFORD	THE BOULEVARD, LANGFORD LANE, KIDLINGTON, OXFORD OX5 1GB, OXON, ENGLAND	0022-2828	1095-8584		J MOL CELL CARDIOL	J. Mol. Cell. Cardiol.	OCT	2016	99						35	46		10.1016/j.yjmcc.2016.08.003
J	Chaurasiya, ND; Gogineni, V; Elokely, KM; Leon, F; Nunez, MJ; Klein, ML; Walker, LA; Cutler, SJ; Tekwani, BL				Chaurasiya, Narayan D.; Gogineni, Vedanjali; Elokely, Khaled M.; Leon, Francisco; Nunez, Marvin J.; Klein, Michael L.; Walker, Larry A.; Cutler, Stephen J.; Tekwani, Babu L.			Isolation of Acacetin from Calea urticifolia with Inhibitory Properties against Human Monoamine Oxidase-A and -B	JOURNAL OF NATURAL PRODUCTS			English	Article							SELECTIVE INHIBITORS; NATURAL-PRODUCTS; DRUG DISCOVERY; MAO-B; MECHANISM; ZACATECHICHI; FLAVONOIDS; MODELS; CELLS; PLANT	Calea urticifolia (Asteraceae: Asteroideae) has long been, used as a traditional medicine in El Salvador to treat arthritis and fever, among other illnesses. The chloroform extract of the leaves of C. urticifolia showed potent inhibition of recombinant human monoamine oxidases (MAO-A and -B). Further bioassay-guided fractionation led to the isolation of a flavonoid, acacetin, as the most prominen…	National Institute of General Medical Sciences (NIGMS), a component of the National Institutes of Health (NIH) [P20GM104932]; NIH National Center for Research Resources (NCRR) [C06RR14503]; graduate student council (GSC)	The project described was supported in part by grant number P20GM104932 from the National Institute of General Medical Sciences (NIGMS), a component of the National Institutes of Health (NIH). The content is solely the responsibility of the authors and does not necessarily represent the official views of the NIGMS or the NIH. Furthermore, this investigation was conducted in a facility constructed…	ANDERSON MC, 1993, NEUROCHEM RES, V18, P1145, DOI 10.1007/BF00978365; Baell J, 2014, NATURE, V513, P481, DOI 10.1038/513481a; Beking K, 2010, PUBLIC HEALTH NUTR, V13, P1403, DOI 10.1017/S1368980009992990; Berman HM, 2000, NUCLEIC ACIDS RES, V28, P235, DOI 10.1093/nar/28.1.235; Binda C, 2012, ACS MED CHEM LETT, V3, P39, DOI 10.1021/ml200196p; Boege F, 1996, J BIOL CHEM, V271, P2262; Boussouar A, 2…	46	4	4	2	8	AMER CHEMICAL SOC	WASHINGTON	1155 16TH ST, NW, WASHINGTON, DC 20036 USA	0163-3864	1520-6025		J NAT PROD	J. Nat. Prod.	OCT	2016	79	10					2538	2544		10.1021/acs.jnatprod.6b00440
J	Tundo, GR; Di Muzio, E; Ciaccio, C; Sbardella, D; Di Pierro, D; Polticelli, F; Coletta, M; Marini, S				Tundo, Grazia R.; Di Muzio, Elena; Ciaccio, Chiara; Sbardella, Diego; Di Pierro, Donato; Polticelli, Fabio; Coletta, Massimo; Marini, Stefano			Multiple allosteric sites are involved in the modulation of insulin-degrading-enzyme activity by somatostatin	FEBS JOURNAL			English	Article						Alzheimer's disease; bradykinin; insulin degrading enzyme; somatostatin; beta-amyloid	IN-VIVO; MOLECULAR-BASIS; PROTEIN; SUBSTRATE; RECOGNITION; PEPTIDE; IDE; EXPRESSION; CLEARANCE; INSULYSIN	Somatostatin is a cyclic peptide, released in the gastrointestinal system and the central nervous system, where it is involved in the regulation of cognitive and sensory functions, motor activity and sleep. It is a substrate of insulin-degrading enzyme (IDE), as well as a modulator of its activity and expression. In the present study, we have investigated the modulatory role of somatostatin on ID…	Italian Ministery of University and Research (MiUR FIRB) [RBNE03PX83]	We especially thank Professor E. Rizzarelli and Dr G. Grasso for several stimulating discussions on the multiple roles of IDE during this investigation. This work has been partially financed by the Italian Ministery of University and Research (MiUR FIRB RBNE03PX83 to MC).	Anoop A, 2014, J BIOL CHEM, V289, P16884, DOI 10.1074/jbc.M114.548354; Berman HM, 2000, NUCLEIC ACIDS RES, V28, P235, DOI 10.1093/nar/28.1.235; Beuzelin C, 2013, PLOS ONE, V8, DOI 10.1371/journal.pone.0067705; Cakir B, 2012, PLOS ONE, V7; Camberos MC, 2001, EXP BIOL MED, V226, P334; Ciaccio C, 2009, J MOL BIOL, V385, P1556, DOI 10.1016/j.jmb.2008.11.025; Deprez-Poulain R, 2015, NAT COMMUN, V6, DO…	46	2	2	1	5	WILEY-BLACKWELL	HOBOKEN	111 RIVER ST, HOBOKEN 07030-5774, NJ USA	1742-464X	1742-4658		FEBS J	FEBS J.	OCT	2016	283	20					3755	3770		10.1111/febs.13841
J	Mortazavi, M; Zarenezhad, M; Gholamzadeh, S; Alavian, SM; Ghorbani, M; Dehghani, R; Malekpour, A; Meshkibaf, M; Fakhrzad, A				Mortazavi, Mojtaba; Zarenezhad, Mohammad; Gholamzadeh, Saeid; Alavian, Seyed Moayed; Ghorbani, Mohammad; Dehghani, Reza; Malekpour, Abdorrasoul; Meshkibaf, Mohammadhasan; Fakhrzad, Ali			Bioinformatic Identification of Rare Codon Clusters (RCCs) in HBV Genome and Evaluation of RCCs in Proteins Structure of Hepatitis B Virus	HEPATITIS MONTHLY			English	Article						Rare Codon Cluster; Hepatitis B Virus; Computational Analysis; Homology Modeling	HIV-1 REVERSE-TRANSCRIPTASE; E-ANTIGEN PRECURSOR; FAMILIES DATABASE; GENETIC DIVERSITY; ESCHERICHIA-COLI; DATA-BANK; X-GENE; POLYMERASE; RNA; TRANSLATION	Background: Hepatitis B virus (HBV) as an infectious disease that has nine genotypes (A-I) and a 'putative' genotype J. Objectives: The aim of this study was to identify the rare codon clusters (RCC) in the HBV genome and to evaluate these RCCs in the HBV proteins structure. Methods: For detection of protein family accession numbers (Pfam) in HBV proteins, the UniProt database and Pfam search too…			Abou Jaoude G, 2005, J VIROL, V79, P10460, DOI 10.1128/JVI.79.16.10460-10644.2005; Alexopoulou A, 2009, ANN GASTROENTEROL, V22, P13; Bairoch A, 1996, NUCLEIC ACIDS RES, V24, P21, DOI 10.1093/nar/24.1.21; Bartholomeusz A, 2006, J MED VIROL, V78, pS52, DOI 10.1002/jmv.20608; Bateman A, 2004, NUCLEIC ACIDS RES, V32, pD138, DOI 10.1093/nar/gkh121; Berman HM, 2000, NUCLEIC ACIDS RES, V28, P235, DOI 10…	74	0	0	0	5	KOWSAR PUBL	HOENSBROEK	PATERSWEG 22,, HOENSBROEK, LIMBURG 6431 GC, NETHERLANDS	1735-143X	1735-3408		HEPAT MON	Hepat. Mon.	OCT	2016	16	10							e39909	10.5812/hepatmon.39909
J	Ammazzalorso, A; De Filippis, B; Campestre, C; Laghezza, A; Marrone, A; Amoroso, R; Tortorella, P; Agamennone, M				Ammazzalorso, Alessandra; De Filippis, Barbara; Campestre, Cristina; Laghezza, Antonio; Marrone, Alessandro; Amoroso, Rosa; Tortorella, Paolo; Agamennone, Mariangela			Seeking for Non-Zinc-Binding MMP-2 Inhibitors: Synthesis, Biological Evaluation and Molecular Modelling Studies	INTERNATIONAL JOURNAL OF MOLECULAR SCIENCES			English	Article						MMPs; inhibitors; molecular dynamics; docking; quinoline; isoquinoline; ureas; non-zinc-binding group	MATRIX-METALLOPROTEINASE INHIBITORS; TISSUE INHIBITOR; ORBITAL METHODS; CANCER-THERAPY; FORCE-FIELD; DERIVATIVES; METASTASIS; SULFONAMIDES; DYNAMICS; DENSITY	Matrix metalloproteinases (MMPs) are an important family of zinc-containing enzymes with a central role in many physiological and pathological processes. Although several MMP inhibitors have been synthesized over the years, none reached the market because of off-target effects, due to the presence of a zinc binding group in the inhibitor structure. To overcome this problem non-zinc-binding inhibi…	Ministry of Education, University and Research of Italy (University "Gabriele d'Annunzio", FAR funds)	This study was supported by grants from the Ministry of Education, University and Research of Italy (University "Gabriele d'Annunzio", FAR funds to Alessandra Ammazzalorso, Barbara De Filippis, Cristina Campestre, Rosa Amoroso, Alessandro Marrone and Mariangela Agamennone).	Acero-Alarcon A, 1999, SYNTHESIS-STUTTGART, P2124; Agrawal A, 2008, CHEMMEDCHEM, V3, P812, DOI 10.1002/cmdc.200700290; Albrecht M, 2002, TETRAHEDRON, V58, P561, DOI 10.1016/S0040-4020(01)01168-1; Apte SS, 2015, MATRIX BIOL, V44-46, P1, DOI 10.1016/j.matbio.2015.04.005; Dea-Ayuela MA, 2009, BIOORGAN MED CHEM, V17, P7449, DOI 10.1016/j.bmc.2009.09.030; BECKE AD, 1993, J CHEM PHYS, V98, P5648, DOI 1…	60	0	0	0	1	MDPI AG	BASEL	ST ALBAN-ANLAGE 66, CH-4052 BASEL, SWITZERLAND	1422-0067			INT J MOL SCI	Int. J. Mol. Sci.	OCT	2016	17	10							1768	10.3390/ijms17101768
J	Ding, YJ; Tang, JJ; Guo, F				Ding, Yijie; Tang, Jijun; Guo, Fei			Identification of Protein-Protein Interactions via a Novel Matrix-Based Sequence Representation Model with Amino Acid Contact Information	INTERNATIONAL JOURNAL OF MOLECULAR SCIENCES			English	Article						protein-protein interactions; protein sequence; feature extraction; amino acid contact; substitution matrix representation	PREDICTION; HYPERPLANES	Identification of protein-protein interactions (PPIs) is a difficult and important problem in biology. Since experimental methods for predicting PPIs are both expensive and time-consuming, many computational methods have been developed to predict PPIs and interaction networks, which can be used to complement experimental approaches. However, these methods have limitations to overcome. They need a…	National Science Foundation of China (NSFC) [61402326]; Peiyang Scholar Program of Tianjin University [2016XRG-0009]; Tianjin Research Program of Application Foundation and Advanced Technology [16JCQNJC00200]	This work is supported by a grant from the National Science Foundation of China (NSFC 61402326), Peiyang Scholar Program of Tianjin University (No. 2016XRG-0009), and the Tianjin Research Program of Application Foundation and Advanced Technology (16JCQNJC00200).	Florencio P, 2002, CURR OPIN STRUC BIOL, V12, P368; Baldassi C, 2014, PLOS ONE, V9, DOI 10.1371/journal.pone.0092721; Berman HM, 2000, NUCLEIC ACIDS RES, V28, P235, DOI 10.1093/nar/28.1.235; Bock JR, 2003, BIOINFORMATICS, V19, P125, DOI 10.1093/bioinformatics/19.1.125; Dalal N., 2005, P IEEE C COMP VIS PA, V1, P886, DOI DOI 10.1109/CVPR.2005.177; Daraselia N, 2004, BIOINFORMATICS, V20, P604, DOI …	35	4	4	1	2	MDPI AG	BASEL	ST ALBAN-ANLAGE 66, CH-4052 BASEL, SWITZERLAND	1422-0067			INT J MOL SCI	Int. J. Mol. Sci.	OCT	2016	17	10							1623	10.3390/ijms17101623
[truncated: 14,457 more rows]
[truncated: 8 more columns]
